# Supplementary material for: Genetic Evidence Implicates the Immune System and Cholesterol Metabolism in the Aetiology of Alzheimer's Disease
Source: PubMed Central journal article supplement (PMC2981526; doi:10.1371/journal.pone.0013950), 2010-11-15
Supplement: pone.0013950.s001.pdf [file pone.0013950.s001.pdf]

**Table S1 Gene ontology categories identified by ALIGATOR analysis of the AD GWA data of Harold and colleagues.<sup>1</sup>**

The 589 genes identified as having GWAS SNP signals  $p < 0.001$  were used: APOE was included in the gene list. In this analysis one SNP was not allowed to add more than one gene to any gene ontology category. "Study-wide p-value" is the probability of obtaining by chance at least one GO category with a category-specific enrichment p-value at least as significant as that observed.

| GO process | Type     | total genes in category | #genes on list | p-value   | Study-wide corrected p-value | Function                                                                                  |
|------------|----------|-------------------------|----------------|-----------|------------------------------|-------------------------------------------------------------------------------------------|
| GO:0032488 | PROCESS  | 4                       | 3              | <1.00E-05 | 0.042                        | Cdc42 protein signal transduction                                                         |
| GO:0033700 | PROCESS  | 8                       | 4              | <1.00E-05 | 0.042                        | phospholipid efflux                                                                       |
| GO:0043691 | PROCESS  | 14                      | 7              | <1.00E-05 | 0.042                        | reverse cholesterol transport                                                             |
| GO:0030301 | PROCESS  | 34                      | 8              | <1.00E-05 | 0.042                        | cholesterol transport                                                                     |
| GO:0015918 | PROCESS  | 34                      | 8              | <1.00E-05 | 0.042                        | sterol transport                                                                          |
| GO:0034369 | PROCESS  | 18                      | 6              | <1.00E-05 | 0.042                        | plasma lipoprotein particle remodeling                                                    |
| GO:0034368 | PROCESS  | 18                      | 6              | <1.00E-05 | 0.042                        | protein-lipid complex remodeling                                                          |
| GO:0034367 | PROCESS  | 18                      | 6              | <1.00E-05 | 0.042                        | macromolecular complex remodeling                                                         |
| GO:0034375 | PROCESS  | 11                      | 5              | <1.00E-05 | 0.042                        | high-density lipoprotein particle remodeling                                              |
| GO:0034382 | PROCESS  | 3                       | 3              | <1.00E-05 | 0.042                        | chylomicron remnant clearance                                                             |
| GO:0016125 | PROCESS  | 87                      | 11             | 2.00E-05  | 0.066                        | sterol metabolic process                                                                  |
| GO:0034364 | CELLULAR | 20                      | 5              | 2.00E-05  | 0.066                        | high-density lipoprotein particle                                                         |
| GO:0022411 | PROCESS  | 55                      | 8              | 2.00E-05  | 0.066                        | cellular component disassembly                                                            |
| GO:0006958 | PROCESS  | 28                      | 6              | 2.00E-05  | 0.066                        | complement activation, classical pathway                                                  |
| GO:0002455 | PROCESS  | 28                      | 6              | 2.00E-05  | 0.066                        | humoral immune response mediated by circulating immunoglobulin                            |
| GO:0042632 | PROCESS  | 33                      | 7              | 4.00E-05  | 0.093                        | cholesterol homeostasis                                                                   |
| GO:0055092 | PROCESS  | 33                      | 7              | 4.00E-05  | 0.093                        | sterol homeostasis                                                                        |
| GO:0006956 | PROCESS  | 37                      | 6              | 4.00E-05  | 0.093                        | complement activation                                                                     |
| GO:0002541 | PROCESS  | 38                      | 6              | 4.00E-05  | 0.093                        | activation of plasma proteins involved in acute inflammatory response                     |
| GO:0045087 | PROCESS  | 120                     | 11             | 6.00E-05  | 0.113                        | innate immune response                                                                    |
| GO:0008203 | PROCESS  | 78                      | 10             | 8.00E-05  | 0.129                        | cholesterol metabolic process                                                             |
| GO:0034384 | PROCESS  | 5                       | 3              | 1.00E-04  | 0.146                        | high-density lipoprotein particle clearance                                               |
| GO:0032984 | PROCESS  | 34                      | 6              | 1.40E-04  | 0.192                        | macromolecular complex disassembly                                                        |
| GO:0032376 | PROCESS  | 7                       | 3              | 1.80E-04  | 0.226                        | positive regulation of cholesterol transport                                              |
| GO:0032373 | PROCESS  | 7                       | 3              | 1.80E-04  | 0.226                        | positive regulation of sterol transport                                                   |
| GO:0010873 | PROCESS  | 6                       | 3              | 2.00E-04  | 0.250                        | positive regulation of cholesterol esterification                                         |
| GO:0030001 | PROCESS  | 410                     | 36             | 2.20E-04  | 0.279                        | metal ion transport                                                                       |
| GO:0034372 | PROCESS  | 6                       | 3              | 2.20E-04  | 0.279                        | very-low-density lipoprotein particle remodeling                                          |
| GO:0008202 | PROCESS  | 174                     | 15             | 2.40E-04  | 0.294                        | steroid metabolic process                                                                 |
| GO:0055088 | PROCESS  | 43                      | 7              | 2.60E-04  | 0.316                        | lipid homeostasis                                                                         |
| GO:0006869 | PROCESS  | 131                     | 14             | 2.80E-04  | 0.336                        | lipid transport                                                                           |
| GO:0034366 | CELLULAR | 7                       | 3              | 2.80E-04  | 0.336                        | spherical high-density lipoprotein particle                                               |
| GO:0034363 | CELLULAR | 3                       | 2              | 2.80E-04  | 0.336                        | intermediate-density lipoprotein particle                                                 |
| GO:0006812 | PROCESS  | 494                     | 38             | 3.60E-04  | 0.404                        | cation transport                                                                          |
| GO:0060228 | FUNCTION | 4                       | 2              | 3.60E-04  | 0.404                        | phosphatidylcholine-sterol O-acyltransferase activator activity                           |
| GO:0032370 | PROCESS  | 9                       | 3              | 3.60E-04  | 0.404                        | positive regulation of lipid transport                                                    |
| GO:0032374 | PROCESS  | 17                      | 4              | 4.40E-04  | 0.455                        | regulation of cholesterol transport                                                       |
| GO:0032371 | PROCESS  | 17                      | 4              | 4.40E-04  | 0.455                        | regulation of sterol transport                                                            |
| GO:0010876 | PROCESS  | 142                     | 14             | 4.80E-04  | 0.487                        | lipid localization                                                                        |
| GO:0016485 | PROCESS  | 95                      | 10             | 4.80E-04  | 0.487                        | protein processing                                                                        |
| GO:0016064 | PROCESS  | 44                      | 6              | 4.80E-04  | 0.487                        | immunoglobulin mediated immune response                                                   |
| GO:0034370 | PROCESS  | 8                       | 3              | 5.00E-04  | 0.505                        | triglyceride-rich lipoprotein particle remodeling                                         |
| GO:0019724 | PROCESS  | 46                      | 6              | 5.80E-04  | 0.549                        | B cell mediated immunity                                                                  |
| GO:0032395 | FUNCTION | 8                       | 4              | 5.80E-04  | 0.549                        | MHC class II receptor activity                                                            |
| GO:0043933 | PROCESS  | 512                     | 25             | 6.00E-04  | 0.563                        | macromolecular complex subunit organization                                               |
| GO:0015672 | PROCESS  | 291                     | 25             | 6.00E-04  | 0.563                        | monovalent inorganic cation transport                                                     |
| GO:0034358 | CELLULAR | 30                      | 5              | 6.40E-04  | 0.580                        | plasma lipoprotein particle                                                               |
| GO:0032994 | CELLULAR | 30                      | 5              | 6.40E-04  | 0.580                        | protein-lipid complex                                                                     |
| GO:0034381 | PROCESS  | 14                      | 4              | 6.40E-04  | 0.580                        | lipoprotein particle clearance                                                            |
| GO:0070328 | PROCESS  | 6                       | 3              | 6.40E-04  | 0.580                        | triglyceride homeostasis                                                                  |
| GO:0051604 | PROCESS  | 104                     | 10             | 7.20E-04  | 0.618                        | protein maturation                                                                        |
| GO:0034380 | PROCESS  | 5                       | 3              | 7.60E-04  | 0.635                        | high-density lipoprotein particle assembly                                                |
| GO:0048584 | PROCESS  | 167                     | 13             | 8.00E-04  | 0.648                        | positive regulation of response to stimulus                                               |
| GO:0044242 | PROCESS  | 80                      | 8              | 8.60E-04  | 0.671                        | cellular lipid catabolic process                                                          |
| GO:0050746 | PROCESS  | 7                       | 3              | 8.80E-04  | 0.675                        | regulation of lipoprotein metabolic process                                               |
| GO:0016042 | PROCESS  | 155                     | 12             | 9.00E-04  | 0.681                        | lipid catabolic process                                                                   |
| GO:0002526 | PROCESS  | 74                      | 7              | 9.40E-04  | 0.700                        | acute inflammatory response                                                               |
| GO:0004875 | FUNCTION | 3                       | 2              | 1.12E-03  | 0.757                        | complement receptor activity                                                              |
| GO:0006707 | PROCESS  | 9                       | 3              | 1.14E-03  | 0.759                        | cholesterol catabolic process                                                             |
| GO:0016127 | PROCESS  | 9                       | 3              | 1.14E-03  | 0.759                        | sterol catabolic process                                                                  |
| GO:0010872 | PROCESS  | 7                       | 3              | 1.20E-03  | 0.772                        | regulation of cholesterol esterification                                                  |
| GO:0006955 | PROCESS  | 576                     | 25             | 1.26E-03  | 0.792                        | immune response                                                                           |
| GO:0006959 | PROCESS  | 68                      | 7              | 1.30E-03  | 0.804                        | humoral immune response                                                                   |
| GO:0002253 | PROCESS  | 66                      | 7              | 1.32E-03  | 0.809                        | activation of immune response                                                             |
| GO:0042613 | CELLULAR | 12                      | 4              | 1.88E-03  | 0.912                        | MHC class II protein complex                                                              |
| GO:0004908 | FUNCTION | 6                       | 3              | 1.88E-03  | 0.912                        | interleukin-1 receptor activity                                                           |
| GO:0002449 | PROCESS  | 56                      | 6              | 2.00E-03  | 0.921                        | lymphocyte mediated immunity                                                              |
| GO:0008324 | FUNCTION | 493                     | 35             | 2.18E-03  | 0.937                        | cation transmembrane transporter activity                                                 |
| GO:0002504 | PROCESS  | 15                      | 4              | 2.32E-03  | 0.952                        | antigen processing and presentation of peptide or polysaccharide antigen via MHC class II |

|            |          |      |    |          |       |                                                                                                                           |
|------------|----------|------|----|----------|-------|---------------------------------------------------------------------------------------------------------------------------|
| GO:0002460 | PROCESS  | 61   | 6  | 2.36E-03 | 0.953 | adaptive immune response based on somatic recombination of immune receptors built from immunoglobulin superfamily domains |
| GO:0002250 | PROCESS  | 61   | 6  | 2.36E-03 | 0.953 | adaptive immune response                                                                                                  |
| GO:0032368 | PROCESS  | 25   | 4  | 2.46E-03 | 0.960 | regulation of lipid transport                                                                                             |
| GO:0006811 | PROCESS  | 690  | 45 | 2.48E-03 | 0.961 | ion transport                                                                                                             |
| GO:0001836 | PROCESS  | 16   | 3  | 2.58E-03 | 0.963 | release of cytochrome c from mitochondria                                                                                 |
| GO:0004872 | FUNCTION | 1518 | 67 | 2.74E-03 | 0.971 | receptor activity                                                                                                         |
| GO:0010984 | PROCESS  | 4    | 2  | 2.78E-03 | 0.973 | regulation of lipoprotein particle clearance                                                                              |
| GO:0051605 | PROCESS  | 65   | 7  | 2.82E-03 | 0.974 | protein maturation by peptide bond cleavage                                                                               |
| GO:0042592 | PROCESS  | 545  | 29 | 3.02E-03 | 0.980 | homeostatic process                                                                                                       |
| GO:0019966 | FUNCTION | 9    | 3  | 3.16E-03 | 0.981 | interleukin-1 binding                                                                                                     |
| GO:0034377 | PROCESS  | 11   | 3  | 3.18E-03 | 0.981 | plasma lipoprotein particle assembly                                                                                      |
| GO:0065005 | PROCESS  | 11   | 3  | 3.18E-03 | 0.981 | protein-lipid complex assembly                                                                                            |
| GO:0010875 | PROCESS  | 6    | 2  | 3.54E-03 | 0.984 | positive regulation of cholesterol efflux                                                                                 |
| GO:0048878 | PROCESS  | 382  | 23 | 3.66E-03 | 0.986 | chemical homeostasis                                                                                                      |
| GO:0002376 | PROCESS  | 811  | 32 | 3.68E-03 | 0.986 | immune system process                                                                                                     |
| GO:0004871 | FUNCTION | 1932 | 83 | 3.90E-03 | 0.991 | signal transducer activity                                                                                                |
| GO:0060089 | FUNCTION | 1932 | 83 | 3.90E-03 | 0.991 | molecular transducer activity                                                                                             |
| GO:0034443 | PROCESS  | 3    | 2  | 3.92E-03 | 0.991 | negative regulation of lipoprotein oxidation                                                                              |
| GO:0034442 | PROCESS  | 3    | 2  | 3.92E-03 | 0.991 | regulation of lipoprotein oxidation                                                                                       |
| GO:0007266 | PROCESS  | 32   | 5  | 3.98E-03 | 0.991 | Rho protein signal transduction                                                                                           |
| GO:0002443 | PROCESS  | 66   | 6  | 4.10E-03 | 0.991 | leukocyte mediated immunity                                                                                               |
| GO:0031420 | FUNCTION | 222  | 20 | 4.40E-03 | 0.994 | alkali metal ion binding                                                                                                  |
| GO:0042176 | PROCESS  | 59   | 6  | 4.48E-03 | 0.994 | regulation of protein catabolic process                                                                                   |
| GO:0015075 | FUNCTION | 649  | 43 | 4.86E-03 | 0.996 | ion transmembrane transporter activity                                                                                    |
| GO:0022857 | FUNCTION | 818  | 50 | 4.92E-03 | 0.996 | transmembrane transporter activity                                                                                        |
| GO:0016126 | PROCESS  | 30   | 4  | 5.26E-03 | 0.996 | sterol biosynthetic process                                                                                               |
| GO:0031402 | FUNCTION | 113  | 12 | 5.34E-03 | 0.996 | sodium ion binding                                                                                                        |
| GO:0004806 | FUNCTION | 15   | 3  | 5.36E-03 | 0.996 | triglyceride lipase activity                                                                                              |
| GO:0005261 | FUNCTION | 252  | 23 | 5.52E-03 | 0.997 | cation channel activity                                                                                                   |
| GO:0051000 | PROCESS  | 7    | 2  | 5.60E-03 | 0.997 | positive regulation of nitric-oxide synthase activity                                                                     |
| GO:0051702 | PROCESS  | 7    | 2  | 5.72E-03 | 0.997 | interaction with symbiont                                                                                                 |
| GO:0005215 | FUNCTION | 1074 | 57 | 6.40E-03 | 0.999 | transporter activity                                                                                                      |
| GO:0005249 | FUNCTION | 94   | 10 | 6.94E-03 | 1.000 | voltage-gated potassium channel activity                                                                                  |
| GO:0002684 | PROCESS  | 164  | 10 | 7.16E-03 | 1.000 | positive regulation of immune system process                                                                              |
| GO:0006706 | PROCESS  | 16   | 3  | 7.16E-03 | 1.000 | steroid catabolic process                                                                                                 |
| GO:0006810 | PROCESS  | 2330 | 96 | 7.26E-03 | 1.000 | transport                                                                                                                 |
| GO:0045940 | PROCESS  | 11   | 3  | 7.50E-03 | 1.000 | positive regulation of steroid metabolic process                                                                          |
| GO:0008637 | PROCESS  | 24   | 3  | 7.56E-03 | 1.000 | apoptotic mitochondrial changes                                                                                           |
| GO:0000300 | CELLULAR | 3    | 2  | 7.70E-03 | 1.000 | peripheral to membrane of membrane fraction                                                                               |
| GO:0008633 | PROCESS  | 21   | 3  | 7.80E-03 | 1.000 | activation of pro-apoptotic gene products                                                                                 |
| GO:0048583 | PROCESS  | 332  | 17 | 8.04E-03 | 1.000 | regulation of response to stimulus                                                                                        |
| GO:0034186 | FUNCTION | 3    | 2  | 8.06E-03 | 1.000 | apolipoprotein A-I binding                                                                                                |
| GO:0046873 | FUNCTION | 296  | 25 | 8.06E-03 | 1.000 | metal ion transmembrane transporter activity                                                                              |
| GO:0006813 | PROCESS  | 146  | 14 | 8.10E-03 | 1.000 | potassium ion transport                                                                                                   |
| GO:0051055 | PROCESS  | 10   | 2  | 8.12E-03 | 1.000 | negative regulation of lipid biosynthetic process                                                                         |
| GO:0010874 | PROCESS  | 7    | 2  | 8.18E-03 | 1.000 | regulation of cholesterol efflux                                                                                          |
| GO:0022836 | FUNCTION | 284  | 25 | 8.20E-03 | 1.000 | gated channel activity                                                                                                    |
| GO:0006814 | PROCESS  | 120  | 12 | 8.74E-03 | 1.000 | sodium ion transport                                                                                                      |
| GO:0006694 | PROCESS  | 71   | 6  | 8.92E-03 | 1.000 | steroid biosynthetic process                                                                                              |
| GO:0008076 | CELLULAR | 80   | 9  | 8.92E-03 | 1.000 | voltage-gated potassium channel complex                                                                                   |
| GO:0034705 | CELLULAR | 80   | 9  | 8.92E-03 | 1.000 | potassium channel complex                                                                                                 |
| GO:0015914 | PROCESS  | 28   | 6  | 8.96E-03 | 1.000 | phospholipid transport                                                                                                    |
| GO:0006695 | PROCESS  | 21   | 3  | 8.96E-03 | 1.000 | cholesterol biosynthetic process                                                                                          |
| GO:0009593 | PROCESS  | 29   | 5  | 9.18E-03 | 1.000 | detection of chemical stimulus                                                                                            |
| GO:0002252 | PROCESS  | 95   | 7  | 9.42E-03 | 1.000 | immune effector process                                                                                                   |
| GO:0051234 | PROCESS  | 2352 | 96 | 9.60E-03 | 1.000 | establishment of localization                                                                                             |
| GO:0030162 | PROCESS  | 41   | 4  | 9.66E-03 | 1.000 | regulation of proteolysis                                                                                                 |
| GO:0046470 | PROCESS  | 16   | 3  | 9.66E-03 | 1.000 | phosphatidylcholine metabolic process                                                                                     |
| GO:0050778 | PROCESS  | 93   | 7  | 1.00E-02 | 1.000 | positive regulation of immune response                                                                                    |
| GO:0042627 | CELLULAR | 10   | 2  | 1.01E-02 | 1.000 | chylomicron                                                                                                               |
| GO:0005267 | FUNCTION | 124  | 12 | 1.01E-02 | 1.000 | potassium channel activity                                                                                                |
| GO:0009894 | PROCESS  | 91   | 7  | 1.03E-02 | 1.000 | regulation of catabolic process                                                                                           |
| GO:0034703 | CELLULAR | 123  | 13 | 1.04E-02 | 1.000 | cation channel complex                                                                                                    |
| GO:0001772 | CELLULAR | 7    | 2  | 1.07E-02 | 1.000 | immunological synapse                                                                                                     |
| GO:0065003 | PROCESS  | 465  | 19 | 1.11E-02 | 1.000 | macromolecular complex assembly                                                                                           |
| GO:0033017 | CELLULAR | 13   | 4  | 1.18E-02 | 1.000 | sarcoplasmic reticulum membrane                                                                                           |
| GO:0031232 | CELLULAR | 4    | 2  | 1.23E-02 | 1.000 | extrinsic to external side of plasma membrane                                                                             |
| GO:0001848 | FUNCTION | 8    | 2  | 1.26E-02 | 1.000 | complement binding                                                                                                        |
| GO:0034185 | FUNCTION | 10   | 3  | 1.26E-02 | 1.000 | apolipoprotein binding                                                                                                    |
| GO:0009896 | PROCESS  | 44   | 4  | 1.33E-02 | 1.000 | positive regulation of catabolic process                                                                                  |
| GO:0051044 | PROCESS  | 9    | 2  | 1.36E-02 | 1.000 | positive regulation of membrane protein ectodomain proteolysis                                                            |
| GO:0017127 | FUNCTION | 12   | 3  | 1.42E-02 | 1.000 | cholesterol transporter activity                                                                                          |
| GO:0046661 | PROCESS  | 45   | 4  | 1.42E-02 | 1.000 | male sex differentiation                                                                                                  |
| GO:0015271 | FUNCTION | 4    | 2  | 1.45E-02 | 1.000 | outward rectifier potassium channel activity                                                                              |
| GO:0022843 | FUNCTION | 134  | 13 | 1.47E-02 | 1.000 | voltage-gated cation channel activity                                                                                     |
| GO:0050748 | PROCESS  | 6    | 2  | 1.51E-02 | 1.000 | negative regulation of lipoprotein metabolic process                                                                      |
| GO:0022891 | FUNCTION | 751  | 44 | 1.57E-02 | 1.000 | substrate-specific transmembrane transporter activity                                                                     |
| GO:0045732 | PROCESS  | 25   | 3  | 1.57E-02 | 1.000 | positive regulation of protein catabolic process                                                                          |

|            |          |      |    |          |       |                                                                     |
|------------|----------|------|----|----------|-------|---------------------------------------------------------------------|
| GO:0007271 | PROCESS  | 13   | 2  | 1.57E-02 | 1.000 | synaptic transmission, cholinergic                                  |
| GO:0005892 | CELLULAR | 13   | 2  | 1.58E-02 | 1.000 | nicotinic acetylcholine-gated receptor-channel complex              |
| GO:0022892 | FUNCTION | 880  | 48 | 1.61E-02 | 1.000 | substrate-specific transporter activity                             |
| GO:0009056 | PROCESS  | 1484 | 50 | 1.61E-02 | 1.000 | catabolic process                                                   |
| GO:0034702 | CELLULAR | 187  | 16 | 1.66E-02 | 1.000 | ion channel complex                                                 |
| GO:0015267 | FUNCTION | 373  | 28 | 1.66E-02 | 1.000 | channel activity                                                    |
| GO:0022803 | FUNCTION | 373  | 28 | 1.66E-02 | 1.000 | passive transmembrane transporter activity                          |
| GO:0019433 | PROCESS  | 6    | 2  | 1.84E-02 | 1.000 | triglyceride catabolic process                                      |
| GO:0004091 | FUNCTION | 91   | 6  | 1.90E-02 | 1.000 | carboxylesterase activity                                           |
| GO:0016459 | CELLULAR | 62   | 7  | 1.93E-02 | 1.000 | myosin complex                                                      |
| GO:0060155 | PROCESS  | 4    | 2  | 1.94E-02 | 1.000 | platelet dense granule organization                                 |
| GO:0015248 | FUNCTION | 14   | 3  | 1.98E-02 | 1.000 | sterol transporter activity                                         |
| GO:0051353 | PROCESS  | 22   | 3  | 1.98E-02 | 1.000 | positive regulation of oxidoreductase activity                      |
| GO:0032770 | PROCESS  | 11   | 2  | 2.00E-02 | 1.000 | positive regulation of monooxygenase activity                       |
| GO:0004620 | FUNCTION | 80   | 7  | 2.08E-02 | 1.000 | phospholipase activity                                              |
| GO:0003950 | FUNCTION | 25   | 3  | 2.12E-02 | 1.000 | NAD+ ADP-ribosyltransferase activity                                |
| GO:0012502 | PROCESS  | 228  | 12 | 2.20E-02 | 1.000 | induction of programmed cell death                                  |
| GO:0006874 | PROCESS  | 127  | 9  | 2.26E-02 | 1.000 | cellular calcium ion homeostasis                                    |
| GO:0002682 | PROCESS  | 280  | 13 | 2.30E-02 | 1.000 | regulation of immune system process                                 |
| GO:0004889 | FUNCTION | 16   | 2  | 2.34E-02 | 1.000 | nicotinic acetylcholine-activated cation-selective channel activity |
| GO:0005216 | FUNCTION | 355  | 27 | 2.34E-02 | 1.000 | ion channel activity                                                |
| GO:0046464 | PROCESS  | 7    | 2  | 2.34E-02 | 1.000 | acylglycerol catabolic process                                      |
| GO:0044269 | PROCESS  | 7    | 2  | 2.34E-02 | 1.000 | glycerol ether catabolic process                                    |
| GO:0046461 | PROCESS  | 7    | 2  | 2.34E-02 | 1.000 | neutral lipid catabolic process                                     |
| GO:0008238 | FUNCTION | 72   | 7  | 2.39E-02 | 1.000 | exopeptidase activity                                               |
| GO:0055074 | PROCESS  | 130  | 9  | 2.41E-02 | 1.000 | calcium ion homeostasis                                             |
| GO:0030005 | PROCESS  | 163  | 10 | 2.48E-02 | 1.000 | cellular di-, tri-valent inorganic cation homeostasis               |
| GO:0009395 | PROCESS  | 19   | 3  | 2.53E-02 | 1.000 | phospholipid catabolic process                                      |
| GO:0042802 | FUNCTION | 517  | 25 | 2.61E-02 | 1.000 | identical protein binding                                           |
| GO:0005543 | FUNCTION | 153  | 11 | 2.63E-02 | 1.000 | phospholipid binding                                                |
| GO:0033344 | PROCESS  | 15   | 3  | 2.68E-02 | 1.000 | cholesterol efflux                                                  |
| GO:0004181 | FUNCTION | 25   | 4  | 2.69E-02 | 1.000 | metallocarboxypeptidase activity                                    |
| GO:0022838 | FUNCTION | 365  | 27 | 2.74E-02 | 1.000 | substrate-specific channel activity                                 |
| GO:0005184 | FUNCTION | 19   | 2  | 2.77E-02 | 1.000 | neuropeptide hormone activity                                       |
| GO:0005244 | FUNCTION | 177  | 15 | 2.77E-02 | 1.000 | voltage-gated ion channel activity                                  |
| GO:0022832 | FUNCTION | 177  | 15 | 2.77E-02 | 1.000 | voltage-gated channel activity                                      |
| GO:0006629 | PROCESS  | 733  | 30 | 2.81E-02 | 1.000 | lipid metabolic process                                             |
| GO:0007218 | PROCESS  | 81   | 7  | 2.85E-02 | 1.000 | neuropeptide signaling pathway                                      |
| GO:0016763 | FUNCTION | 45   | 4  | 2.91E-02 | 1.000 | transferase activity, transferring pentosyl groups                  |
| GO:0016455 | FUNCTION | 27   | 3  | 2.92E-02 | 1.000 | RNA polymerase II transcription mediator activity                   |
| GO:0055066 | PROCESS  | 173  | 10 | 2.94E-02 | 1.000 | di-, tri-valent inorganic cation homeostasis                        |
| GO:0050801 | PROCESS  | 301  | 17 | 2.96E-02 | 1.000 | ion homeostasis                                                     |
| GO:0031202 | FUNCTION | 24   | 2  | 2.97E-02 | 1.000 | RNA splicing factor activity, transesterification mechanism         |
| GO:0050776 | PROCESS  | 152  | 8  | 2.98E-02 | 1.000 | regulation of immune response                                       |
| GO:0032312 | PROCESS  | 27   | 3  | 3.01E-02 | 1.000 | regulation of ARF GTPase activity                                   |
| GO:0007159 | PROCESS  | 21   | 3  | 3.11E-02 | 1.000 | leukocyte adhesion                                                  |
| GO:0042611 | CELLULAR | 34   | 4  | 3.16E-02 | 1.000 | MHC protein complex                                                 |
| GO:0007548 | PROCESS  | 98   | 6  | 3.18E-02 | 1.000 | sex differentiation                                                 |
| GO:0008060 | FUNCTION | 28   | 3  | 3.20E-02 | 1.000 | ARF GTPase activator activity                                       |
| GO:0001942 | PROCESS  | 26   | 3  | 3.21E-02 | 1.000 | hair follicle development                                           |
| GO:0022405 | PROCESS  | 26   | 3  | 3.21E-02 | 1.000 | hair cycle process                                                  |
| GO:0022404 | PROCESS  | 26   | 3  | 3.21E-02 | 1.000 | molting cycle process                                               |
| GO:0052548 | PROCESS  | 68   | 5  | 3.28E-02 | 1.000 | regulation of endopeptidase activity                                |
| GO:0070325 | FUNCTION | 15   | 2  | 3.30E-02 | 1.000 | lipoprotein receptor binding                                        |
| GO:0006919 | PROCESS  | 45   | 4  | 3.34E-02 | 1.000 | activation of caspase activity                                      |
| GO:0042633 | PROCESS  | 27   | 3  | 3.42E-02 | 1.000 | hair cycle                                                          |
| GO:0042303 | PROCESS  | 27   | 3  | 3.42E-02 | 1.000 | molting cycle                                                       |
| GO:0005545 | FUNCTION | 21   | 3  | 3.44E-02 | 1.000 | phosphatidylinositol binding                                        |
| GO:0006461 | PROCESS  | 325  | 15 | 3.51E-02 | 1.000 | protein complex assembly                                            |
| GO:0070271 | PROCESS  | 325  | 15 | 3.51E-02 | 1.000 | protein complex biogenesis                                          |
| GO:0050999 | PROCESS  | 12   | 2  | 3.52E-02 | 1.000 | regulation of nitric-oxide synthase activity                        |
| GO:0001530 | FUNCTION | 11   | 2  | 3.59E-02 | 1.000 | lipopolysaccharide binding                                          |
| GO:0046503 | PROCESS  | 8    | 2  | 3.61E-02 | 1.000 | glycerolipid catabolic process                                      |
| GO:0048806 | PROCESS  | 14   | 2  | 3.69E-02 | 1.000 | genitalia development                                               |
| GO:0048070 | PROCESS  | 8    | 2  | 3.73E-02 | 1.000 | regulation of pigmentation during development                       |
| GO:0034361 | CELLULAR | 16   | 2  | 3.78E-02 | 1.000 | very-low-density lipoprotein particle                               |
| GO:0034385 | CELLULAR | 16   | 2  | 3.78E-02 | 1.000 | triglyceride-rich lipoprotein particle                              |
| GO:0033363 | PROCESS  | 7    | 2  | 3.80E-02 | 1.000 | secretory granule organization                                      |
| GO:0008034 | FUNCTION | 32   | 5  | 3.82E-02 | 1.000 | lipoprotein binding                                                 |
| GO:0008305 | CELLULAR | 28   | 4  | 3.87E-02 | 1.000 | integrin complex                                                    |
| GO:0016298 | FUNCTION | 95   | 7  | 3.88E-02 | 1.000 | lipase activity                                                     |
| GO:0006917 | PROCESS  | 227  | 11 | 3.89E-02 | 1.000 | induction of apoptosis                                              |
| GO:0044248 | PROCESS  | 951  | 30 | 3.92E-02 | 1.000 | cellular catabolic process                                          |
| GO:0044255 | PROCESS  | 598  | 25 | 3.94E-02 | 1.000 | cellular lipid metabolic process                                    |
| GO:0052547 | PROCESS  | 72   | 5  | 3.94E-02 | 1.000 | regulation of peptidase activity                                    |
| GO:0042803 | FUNCTION | 261  | 15 | 3.95E-02 | 1.000 | protein homodimerization activity                                   |
| GO:0051219 | FUNCTION | 14   | 2  | 3.99E-02 | 1.000 | phosphoprotein binding                                              |
| GO:0051043 | PROCESS  | 12   | 2  | 4.05E-02 | 1.000 | regulation of membrane protein ectodomain proteolysis               |
| GO:0005513 | PROCESS  | 9    | 3  | 4.05E-02 | 1.000 | detection of calcium ion                                            |

|            |          |      |     |          |       |                                                                                    |
|------------|----------|------|-----|----------|-------|------------------------------------------------------------------------------------|
| GO:0008092 | FUNCTION | 433  | 25  | 4.08E-02 | 1.000 | cytoskeletal protein binding                                                       |
| GO:0004715 | FUNCTION | 38   | 4   | 4.25E-02 | 1.000 | non-membrane spanning protein tyrosine kinase activity                             |
| GO:0046466 | PROCESS  | 15   | 2   | 4.26E-02 | 1.000 | membrane lipid catabolic process                                                   |
| GO:0030149 | PROCESS  | 15   | 2   | 4.26E-02 | 1.000 | sphingolipid catabolic process                                                     |
| GO:0045646 | PROCESS  | 16   | 2   | 4.35E-02 | 1.000 | regulation of erythrocyte differentiation                                          |
| GO:0006508 | PROCESS  | 926  | 32  | 4.36E-02 | 1.000 | proteolysis                                                                        |
| GO:0042439 | PROCESS  | 26   | 3   | 4.42E-02 | 1.000 | ethanolamine and derivative metabolic process                                      |
| GO:0006873 | PROCESS  | 274  | 15  | 4.44E-02 | 1.000 | cellular ion homeostasis                                                           |
| GO:0032012 | PROCESS  | 42   | 4   | 4.45E-02 | 1.000 | regulation of ARF protein signal transduction                                      |
| GO:0032367 | PROCESS  | 4    | 2   | 4.47E-02 | 1.000 | intracellular cholesterol transport                                                |
| GO:0032366 | PROCESS  | 4    | 2   | 4.47E-02 | 1.000 | intracellular sterol transport                                                     |
| GO:0030804 | PROCESS  | 9    | 2   | 4.49E-02 | 1.000 | positive regulation of cyclic nucleotide biosynthetic process                      |
| GO:0030801 | PROCESS  | 9    | 2   | 4.49E-02 | 1.000 | positive regulation of cyclic nucleotide metabolic process                         |
| GO:0030810 | PROCESS  | 9    | 2   | 4.49E-02 | 1.000 | positive regulation of nucleotide biosynthetic process                             |
| GO:0045981 | PROCESS  | 9    | 2   | 4.49E-02 | 1.000 | positive regulation of nucleotide metabolic process                                |
| GO:0050684 | PROCESS  | 15   | 2   | 4.50E-02 | 1.000 | regulation of mRNA processing                                                      |
| GO:0030163 | PROCESS  | 936  | 32  | 4.61E-02 | 1.000 | protein catabolic process                                                          |
| GO:0043280 | PROCESS  | 51   | 4   | 4.73E-02 | 1.000 | positive regulation of caspase activity                                            |
| GO:0010952 | PROCESS  | 51   | 4   | 4.73E-02 | 1.000 | positive regulation of peptidase activity                                          |
| GO:0045833 | PROCESS  | 19   | 2   | 4.77E-02 | 1.000 | negative regulation of lipid metabolic process                                     |
| GO:0009595 | PROCESS  | 15   | 2   | 4.79E-02 | 1.000 | detection of biotic stimulus                                                       |
| GO:0005217 | FUNCTION | 13   | 4   | 4.85E-02 | 1.000 | intracellular ligand-gated ion channel activity                                    |
| GO:0016021 | CELLULAR | 4844 | 168 | 4.85E-02 | 1.000 | integral to membrane                                                               |
| GO:0033036 | PROCESS  | 946  | 36  | 4.86E-02 | 1.000 | macromolecule localization                                                         |
| GO:0006641 | PROCESS  | 31   | 3   | 4.86E-02 | 1.000 | triglyceride metabolic process                                                     |
| GO:0042471 | PROCESS  | 50   | 3   | 4.86E-02 | 1.000 | ear morphogenesis                                                                  |
| GO:0005272 | FUNCTION | 31   | 4   | 4.88E-02 | 1.000 | sodium channel activity                                                            |
| GO:0006954 | PROCESS  | 263  | 11  | 4.96E-02 | 1.000 | inflammatory response                                                              |
| GO:0008015 | PROCESS  | 144  | 9   | 5.01E-02 | 1.000 | blood circulation                                                                  |
| GO:0003013 | PROCESS  | 144  | 9   | 5.01E-02 | 1.000 | circulatory system process                                                         |
| GO:0005319 | FUNCTION | 57   | 6   | 5.02E-02 | 1.000 | lipid transporter activity                                                         |
| GO:0055082 | PROCESS  | 280  | 15  | 5.04E-02 | 1.000 | cellular chemical homeostasis                                                      |
| GO:0008235 | FUNCTION | 37   | 4   | 5.12E-02 | 1.000 | metalloexopeptidase activity                                                       |
| GO:0015297 | FUNCTION | 59   | 6   | 5.30E-02 | 1.000 | antiporter activity                                                                |
| GO:0045862 | PROCESS  | 20   | 2   | 5.34E-02 | 1.000 | positive regulation of proteolysis                                                 |
| GO:0055080 | PROCESS  | 210  | 12  | 5.41E-02 | 1.000 | cation homeostasis                                                                 |
| GO:0010594 | PROCESS  | 49   | 4   | 5.46E-02 | 1.000 | regulation of endothelial cell migration                                           |
| GO:0046546 | PROCESS  | 39   | 3   | 5.49E-02 | 1.000 | development of primary male sexual characteristics                                 |
| GO:0015020 | FUNCTION | 28   | 3   | 5.52E-02 | 1.000 | glucuronosyltransferase activity                                                   |
| GO:0032365 | PROCESS  | 7    | 2   | 5.56E-02 | 1.000 | intracellular lipid transport                                                      |
| GO:0007265 | PROCESS  | 92   | 6   | 5.61E-02 | 1.000 | Ras protein signal transduction                                                    |
| GO:0015276 | FUNCTION | 113  | 11  | 5.61E-02 | 1.000 | ligand-gated ion channel activity                                                  |
| GO:0022834 | FUNCTION | 113  | 11  | 5.61E-02 | 1.000 | ligand-gated channel activity                                                      |
| GO:0032844 | PROCESS  | 80   | 5   | 5.68E-02 | 1.000 | regulation of homeostatic process                                                  |
| GO:0055091 | PROCESS  | 5    | 2   | 5.71E-02 | 1.000 | phospholipid homeostasis                                                           |
| GO:0043167 | FUNCTION | 3926 | 138 | 5.81E-02 | 1.000 | ion binding                                                                        |
| GO:0006921 | PROCESS  | 20   | 2   | 5.89E-02 | 1.000 | cell structure disassembly during apoptosis                                        |
| GO:0003006 | PROCESS  | 108  | 6   | 5.93E-02 | 1.000 | reproductive developmental process                                                 |
| GO:0043583 | PROCESS  | 68   | 5   | 5.93E-02 | 1.000 | ear development                                                                    |
| GO:0016192 | PROCESS  | 484  | 22  | 5.93E-02 | 1.000 | vesicle-mediated transport                                                         |
| GO:0005769 | CELLULAR | 64   | 4   | 5.93E-02 | 1.000 | early endosome                                                                     |
| GO:0051224 | PROCESS  | 34   | 3   | 5.98E-02 | 1.000 | negative regulation of protein transport                                           |
| GO:0030139 | CELLULAR | 52   | 5   | 5.99E-02 | 1.000 | endocytic vesicle                                                                  |
| GO:0045834 | PROCESS  | 30   | 3   | 6.03E-02 | 1.000 | positive regulation of lipid metabolic process                                     |
| GO:0007005 | PROCESS  | 104  | 5   | 6.11E-02 | 1.000 | mitochondrion organization                                                         |
| GO:0005819 | CELLULAR | 112  | 5   | 6.14E-02 | 1.000 | spindle                                                                            |
| GO:0015291 | FUNCTION | 186  | 12  | 6.20E-02 | 1.000 | secondary active transmembrane transporter activity                                |
| GO:0051179 | PROCESS  | 2739 | 106 | 6.36E-02 | 1.000 | localization                                                                       |
| GO:0004180 | FUNCTION | 36   | 4   | 6.37E-02 | 1.000 | carboxypeptidase activity                                                          |
| GO:0006897 | PROCESS  | 181  | 11  | 6.38E-02 | 1.000 | endocytosis                                                                        |
| GO:0010324 | PROCESS  | 181  | 11  | 6.38E-02 | 1.000 | membrane invagination                                                              |
| GO:0006915 | PROCESS  | 446  | 17  | 6.38E-02 | 1.000 | apoptosis                                                                          |
| GO:0051341 | PROCESS  | 33   | 3   | 6.39E-02 | 1.000 | regulation of oxidoreductase activity                                              |
| GO:0003779 | FUNCTION | 290  | 19  | 6.45E-02 | 1.000 | actin binding                                                                      |
| GO:0051336 | PROCESS  | 289  | 13  | 6.49E-02 | 1.000 | regulation of hydrolase activity                                                   |
| GO:0030201 | PROCESS  | 13   | 3   | 6.50E-02 | 1.000 | heparan sulfate proteoglycan metabolic process                                     |
| GO:0043279 | PROCESS  | 22   | 3   | 6.52E-02 | 1.000 | response to alkaloid                                                               |
| GO:0015464 | FUNCTION | 18   | 2   | 6.55E-02 | 1.000 | acetylcholine receptor activity                                                    |
| GO:0043624 | PROCESS  | 13   | 2   | 6.55E-02 | 1.000 | cellular protein complex disassembly                                               |
| GO:0043241 | PROCESS  | 13   | 2   | 6.55E-02 | 1.000 | protein complex disassembly                                                        |
| GO:0042312 | PROCESS  | 14   | 2   | 6.71E-02 | 1.000 | regulation of vasodilation                                                         |
| GO:0006875 | PROCESS  | 136  | 9   | 6.88E-02 | 1.000 | cellular metal ion homeostasis                                                     |
| GO:0007274 | PROCESS  | 15   | 2   | 6.89E-02 | 1.000 | neuromuscular synaptic transmission                                                |
| GO:0051606 | PROCESS  | 98   | 7   | 6.94E-02 | 1.000 | detection of stimulus                                                              |
| GO:0042166 | FUNCTION | 20   | 2   | 7.00E-02 | 1.000 | acetylcholine binding                                                              |
| GO:0009636 | PROCESS  | 36   | 3   | 7.01E-02 | 1.000 | response to toxin                                                                  |
| GO:0012501 | PROCESS  | 453  | 17  | 7.01E-02 | 1.000 | programmed cell death                                                              |
| GO:0051437 | PROCESS  | 63   | 3   | 7.03E-02 | 1.000 | positive regulation of ubiquitin-protein ligase activity during mitotic cell cycle |

|            |          |      |     |          |       |                                                                           |
|------------|----------|------|-----|----------|-------|---------------------------------------------------------------------------|
| GO:0032409 | PROCESS  | 27   | 3   | 7.12E-02 | 1.000 | regulation of transporter activity                                        |
| GO:0043169 | FUNCTION | 3876 | 135 | 7.13E-02 | 1.000 | cation binding                                                            |
| GO:0046928 | PROCESS  | 12   | 2   | 7.30E-02 | 1.000 | regulation of neurotransmitter secretion                                  |
| GO:0016251 | FUNCTION | 47   | 3   | 7.46E-02 | 1.000 | general RNA polymerase II transcription factor activity                   |
| GO:0043535 | PROCESS  | 40   | 3   | 7.47E-02 | 1.000 | regulation of blood vessel endothelial cell migration                     |
| GO:0015300 | FUNCTION | 48   | 5   | 7.50E-02 | 1.000 | solute:solute antiporter activity                                         |
| GO:0043285 | PROCESS  | 1074 | 34  | 7.50E-02 | 1.000 | biopolymer catabolic process                                              |
| GO:0051443 | PROCESS  | 65   | 3   | 7.51E-02 | 1.000 | positive regulation of ubiquitin-protein ligase activity                  |
| GO:0005876 | CELLULAR | 24   | 2   | 7.53E-02 | 1.000 | spindle microtubule                                                       |
| GO:0048518 | PROCESS  | 1531 | 53  | 7.59E-02 | 1.000 | positive regulation of biological process                                 |
| GO:0001816 | PROCESS  | 31   | 3   | 7.60E-02 | 1.000 | cytokine production                                                       |
| GO:0016755 | FUNCTION | 18   | 2   | 7.65E-02 | 1.000 | transferase activity, transferring amino-acyl groups                      |
| GO:0018210 | PROCESS  | 14   | 2   | 7.66E-02 | 1.000 | peptidyl-threonine modification                                           |
| GO:0009057 | PROCESS  | 1130 | 35  | 7.66E-02 | 1.000 | macromolecule catabolic process                                           |
| GO:0007528 | PROCESS  | 10   | 2   | 7.67E-02 | 1.000 | neuromuscular junction development                                        |
| GO:0051439 | PROCESS  | 66   | 3   | 7.68E-02 | 1.000 | regulation of ubiquitin-protein ligase activity during mitotic cell cycle |
| GO:0030100 | PROCESS  | 50   | 4   | 7.71E-02 | 1.000 | regulation of endocytosis                                                 |
| GO:0001950 | CELLULAR | 5    | 2   | 7.75E-02 | 1.000 | plasma membrane enriched fraction                                         |
| GO:0048286 | PROCESS  | 13   | 2   | 7.76E-02 | 1.000 | lung alveolus development                                                 |
| GO:0031331 | PROCESS  | 23   | 2   | 7.90E-02 | 1.000 | positive regulation of cellular catabolic process                         |
| GO:0030276 | FUNCTION | 8    | 2   | 7.93E-02 | 1.000 | clathrin binding                                                          |
| GO:0019882 | PROCESS  | 54   | 4   | 7.99E-02 | 1.000 | antigen processing and presentation                                       |
| GO:0006639 | PROCESS  | 35   | 3   | 8.05E-02 | 1.000 | acylglycerol metabolic process                                            |
| GO:0006638 | PROCESS  | 35   | 3   | 8.05E-02 | 1.000 | neutral lipid metabolic process                                           |
| GO:0016411 | FUNCTION | 15   | 2   | 8.06E-02 | 1.000 | acylglycerol O-acyltransferase activity                                   |
| GO:0030003 | PROCESS  | 183  | 10  | 8.24E-02 | 1.000 | cellular cation homeostasis                                               |
| GO:0015385 | FUNCTION | 7    | 2   | 8.29E-02 | 1.000 | sodium:hydrogen antiporter activity                                       |
| GO:0005451 | FUNCTION | 7    | 2   | 8.29E-02 | 1.000 | monovalent cation:hydrogen antiporter activity                            |
| GO:0034374 | PROCESS  | 9    | 2   | 8.30E-02 | 1.000 | low-density lipoprotein particle remodeling                               |
| GO:0015078 | FUNCTION | 77   | 4   | 8.34E-02 | 1.000 | hydrogen ion transmembrane transporter activity                           |
| GO:0005764 | CELLULAR | 189  | 8   | 8.36E-02 | 1.000 | lysosome                                                                  |
| GO:0000323 | CELLULAR | 189  | 8   | 8.36E-02 | 1.000 | lytic vacuole                                                             |
| GO:0044403 | PROCESS  | 35   | 3   | 8.36E-02 | 1.000 | symbiosis, encompassing mutualism through parasitism                      |
| GO:0001540 | FUNCTION | 12   | 2   | 8.37E-02 | 1.000 | beta-amyloid binding                                                      |
| GO:0015629 | CELLULAR | 224  | 14  | 8.37E-02 | 1.000 | actin cytoskeleton                                                        |
| GO:0055065 | PROCESS  | 143  | 9   | 8.40E-02 | 1.000 | metal ion homeostasis                                                     |
| GO:0005741 | CELLULAR | 79   | 4   | 8.59E-02 | 1.000 | mitochondrial outer membrane                                              |
| GO:0031526 | CELLULAR | 15   | 2   | 8.64E-02 | 1.000 | brush border membrane                                                     |
| GO:0015077 | FUNCTION | 88   | 5   | 8.68E-02 | 1.000 | monovalent inorganic cation transmembrane transporter activity            |
| GO:0006805 | PROCESS  | 20   | 2   | 8.76E-02 | 1.000 | xenobiotic metabolic process                                              |
| GO:0006778 | PROCESS  | 25   | 2   | 8.82E-02 | 1.000 | porphyrin metabolic process                                               |
| GO:0033013 | PROCESS  | 25   | 2   | 8.82E-02 | 1.000 | tetrapyrrole metabolic process                                            |
| GO:0006662 | PROCESS  | 37   | 3   | 8.84E-02 | 1.000 | glycerol ether metabolic process                                          |
| GO:0030955 | FUNCTION | 124  | 10  | 8.92E-02 | 1.000 | potassium ion binding                                                     |
| GO:0048741 | PROCESS  | 41   | 4   | 8.93E-02 | 1.000 | skeletal muscle fiber development                                         |
| GO:0006509 | PROCESS  | 13   | 2   | 8.94E-02 | 1.000 | membrane protein ectodomain proteolysis                                   |
| GO:0016363 | CELLULAR | 48   | 3   | 8.99E-02 | 1.000 | nuclear matrix                                                            |
| GO:0051351 | PROCESS  | 68   | 3   | 9.00E-02 | 1.000 | positive regulation of ligase activity                                    |
| GO:0046872 | FUNCTION | 3842 | 133 | 9.03E-02 | 1.000 | metal ion binding                                                         |
| GO:0005231 | FUNCTION | 46   | 5   | 9.10E-02 | 1.000 | excitatory extracellular ligand-gated ion channel activity                |
| GO:0030594 | FUNCTION | 92   | 6   | 9.10E-02 | 1.000 | neurotransmitter receptor activity                                        |
| GO:0016891 | FUNCTION | 24   | 2   | 9.12E-02 | 1.000 | endoribonuclease activity, producing 5'-phosphomonoesters                 |
| GO:0018904 | PROCESS  | 38   | 3   | 9.14E-02 | 1.000 | organic ether metabolic process                                           |
| GO:0030169 | FUNCTION | 21   | 4   | 9.15E-02 | 1.000 | low-density lipoprotein binding                                           |
| GO:0007165 | PROCESS  | 3016 | 106 | 9.18E-02 | 1.000 | signal transduction                                                       |
| GO:0006891 | PROCESS  | 18   | 2   | 9.19E-02 | 1.000 | intra-Golgi vesicle-mediated transport                                    |
| GO:0051049 | PROCESS  | 317  | 15  | 9.19E-02 | 1.000 | regulation of transport                                                   |
| GO:0022890 | FUNCTION | 127  | 7   | 9.21E-02 | 1.000 | inorganic cation transmembrane transporter activity                       |
| GO:0042165 | FUNCTION | 93   | 6   | 9.21E-02 | 1.000 | neurotransmitter binding                                                  |
| GO:0000041 | PROCESS  | 63   | 4   | 9.27E-02 | 1.000 | transition metal ion transport                                            |
| GO:0047555 | FUNCTION | 7    | 2   | 9.28E-02 | 1.000 | 3',5'-cyclic-GMP phosphodiesterase activity                               |
| GO:0009986 | CELLULAR | 248  | 16  | 9.34E-02 | 1.000 | cell surface                                                              |
| GO:0043281 | PROCESS  | 65   | 4   | 9.36E-02 | 1.000 | regulation of caspase activity                                            |
| GO:0034623 | PROCESS  | 20   | 2   | 9.36E-02 | 1.000 | cellular macromolecular complex disassembly                               |
| GO:0044093 | PROCESS  | 481  | 19  | 9.41E-02 | 1.000 | positive regulation of molecular function                                 |
| GO:0015674 | PROCESS  | 141  | 12  | 9.43E-02 | 1.000 | di-, tri-valent inorganic cation transport                                |
| GO:0043473 | PROCESS  | 37   | 3   | 9.51E-02 | 1.000 | pigmentation                                                              |
| GO:0016567 | PROCESS  | 96   | 5   | 9.57E-02 | 1.000 | protein ubiquitination                                                    |
| GO:0046578 | PROCESS  | 187  | 12  | 9.67E-02 | 1.000 | regulation of Ras protein signal transduction                             |
| GO:0006996 | PROCESS  | 1117 | 35  | 9.70E-02 | 1.000 | organelle organization                                                    |
| GO:0051438 | PROCESS  | 73   | 3   | 9.76E-02 | 1.000 | regulation of ubiquitin-protein ligase activity                           |
| GO:0048168 | PROCESS  | 16   | 2   | 9.91E-02 | 1.000 | regulation of neuronal synaptic plasticity                                |
| GO:0006826 | PROCESS  | 24   | 2   | 1.00E-01 | 1.000 | iron ion transport                                                        |
| GO:0042113 | PROCESS  | 53   | 4   | 1.00E-01 | 1.000 | B cell activation                                                         |
| GO:0032103 | PROCESS  | 48   | 4   | 1.01E-01 | 1.000 | positive regulation of response to external stimulus                      |
| GO:0006471 | PROCESS  | 21   | 2   | 1.01E-01 | 1.000 | protein amino acid ADP-ribosylation                                       |
| GO:0022607 | PROCESS  | 639  | 22  | 1.02E-01 | 1.000 | cellular component assembly                                               |
| GO:0004709 | FUNCTION | 17   | 2   | 1.02E-01 | 1.000 | MAP kinase kinase kinase activity                                         |
| GO:0003008 | PROCESS  | 1267 | 45  | 1.02E-01 | 1.000 | system process                                                            |

|            |          |      |     |          |       |                                                                                                              |
|------------|----------|------|-----|----------|-------|--------------------------------------------------------------------------------------------------------------|
| GO:0034399 | CELLULAR | 52   | 3   | 1.03E-01 | 1.000 | nuclear periphery                                                                                            |
| GO:0019835 | PROCESS  | 18   | 2   | 1.03E-01 | 1.000 | cytolysis                                                                                                    |
| GO:0015012 | PROCESS  | 10   | 2   | 1.04E-01 | 1.000 | heparan sulfate proteoglycan biosynthetic process                                                            |
| GO:0030552 | FUNCTION | 12   | 2   | 1.05E-01 | 1.000 | cAMP binding                                                                                                 |
| GO:0019218 | PROCESS  | 27   | 3   | 1.05E-01 | 1.000 | regulation of steroid metabolic process                                                                      |
| GO:0060401 | PROCESS  | 15   | 3   | 1.06E-01 | 1.000 | cytosolic calcium ion transport                                                                              |
| GO:0009410 | PROCESS  | 23   | 2   | 1.07E-01 | 1.000 | response to xenobiotic stimulus                                                                              |
| GO:0043235 | CELLULAR | 100  | 7   | 1.08E-01 | 1.000 | receptor complex                                                                                             |
| GO:0005886 | CELLULAR | 3374 | 132 | 1.08E-01 | 1.000 | plasma membrane                                                                                              |
| GO:0006898 | PROCESS  | 44   | 4   | 1.09E-01 | 1.000 | receptor-mediated endocytosis                                                                                |
| GO:0030193 | PROCESS  | 25   | 2   | 1.10E-01 | 1.000 | regulation of blood coagulation                                                                              |
| GO:0032768 | PROCESS  | 21   | 2   | 1.10E-01 | 1.000 | regulation of monooxygenase activity                                                                         |
| GO:0009611 | PROCESS  | 399  | 15  | 1.10E-01 | 1.000 | response to wounding                                                                                         |
| GO:0005539 | FUNCTION | 122  | 7   | 1.10E-01 | 1.000 | glycosaminoglycan binding                                                                                    |
| GO:0035091 | FUNCTION | 92   | 6   | 1.11E-01 | 1.000 | phosphoinositide binding                                                                                     |
| GO:0015380 | FUNCTION | 17   | 2   | 1.12E-01 | 1.000 | anion exchanger activity                                                                                     |
| GO:0001653 | FUNCTION | 102  | 6   | 1.12E-01 | 1.000 | peptide receptor activity                                                                                    |
| GO:0003774 | FUNCTION | 135  | 9   | 1.12E-01 | 1.000 | motor activity                                                                                               |
| GO:0010885 | PROCESS  | 10   | 2   | 1.13E-01 | 1.000 | regulation of cholesterol storage                                                                            |
| GO:0051340 | PROCESS  | 76   | 3   | 1.14E-01 | 1.000 | regulation of ligase activity                                                                                |
| GO:0007154 | PROCESS  | 3319 | 117 | 1.14E-01 | 1.000 | cell communication                                                                                           |
| GO:0046983 | FUNCTION | 420  | 19  | 1.14E-01 | 1.000 | protein dimerization activity                                                                                |
| GO:0007204 | PROCESS  | 76   | 5   | 1.15E-01 | 1.000 | elevation of cytosolic calcium ion concentration                                                             |
| GO:0030425 | CELLULAR | 77   | 6   | 1.16E-01 | 1.000 | dendrite                                                                                                     |
| GO:0000049 | FUNCTION | 21   | 2   | 1.17E-01 | 1.000 | tRNA binding                                                                                                 |
| GO:0000776 | CELLULAR | 66   | 3   | 1.17E-01 | 1.000 | kinetochore                                                                                                  |
| GO:0019838 | FUNCTION | 89   | 6   | 1.17E-01 | 1.000 | growth factor binding                                                                                        |
| GO:0015485 | FUNCTION | 15   | 2   | 1.18E-01 | 1.000 | cholesterol binding                                                                                          |
| GO:0019725 | PROCESS  | 356  | 16  | 1.18E-01 | 1.000 | cellular homeostasis                                                                                         |
| GO:0004842 | FUNCTION | 127  | 6   | 1.18E-01 | 1.000 | ubiquitin-protein ligase activity                                                                            |
| GO:0000151 | CELLULAR | 79   | 4   | 1.18E-01 | 1.000 | ubiquitin ligase complex                                                                                     |
| GO:0004114 | FUNCTION | 24   | 4   | 1.19E-01 | 1.000 | 3',5'-cyclic-nucleotide phosphodiesterase activity                                                           |
| GO:0015278 | FUNCTION | 9    | 3   | 1.19E-01 | 1.000 | calcium-release channel activity                                                                             |
| GO:0004112 | FUNCTION | 25   | 4   | 1.20E-01 | 1.000 | cyclic-nucleotide phosphodiesterase activity                                                                 |
| GO:0032446 | PROCESS  | 107  | 5   | 1.20E-01 | 1.000 | protein modification by small protein conjugation                                                            |
| GO:0033619 | PROCESS  | 18   | 2   | 1.21E-01 | 1.000 | membrane protein proteolysis                                                                                 |
| GO:0019897 | CELLULAR | 44   | 4   | 1.22E-01 | 1.000 | extrinsic to plasma membrane                                                                                 |
| GO:0007588 | PROCESS  | 46   | 4   | 1.22E-01 | 1.000 | excretion                                                                                                    |
| GO:0043068 | PROCESS  | 305  | 13  | 1.23E-01 | 1.000 | positive regulation of programmed cell death                                                                 |
| GO:0051588 | PROCESS  | 17   | 2   | 1.23E-01 | 1.000 | regulation of neurotransmitter transport                                                                     |
| GO:0004888 | FUNCTION | 1115 | 41  | 1.23E-01 | 1.000 | transmembrane receptor activity                                                                              |
| GO:0005887 | CELLULAR | 1099 | 50  | 1.24E-01 | 1.000 | integral to plasma membrane                                                                                  |
| GO:0050818 | PROCESS  | 27   | 2   | 1.24E-01 | 1.000 | regulation of coagulation                                                                                    |
| GO:0048863 | PROCESS  | 22   | 2   | 1.25E-01 | 1.000 | stem cell differentiation                                                                                    |
| GO:0008415 | FUNCTION | 178  | 7   | 1.25E-01 | 1.000 | acyltransferase activity                                                                                     |
| GO:0016893 | FUNCTION | 30   | 2   | 1.25E-01 | 1.000 | endonuclease activity, active with either ribo- or deoxyribonucleic acids and producing 5'-phosphomonoesters |
| GO:0051480 | PROCESS  | 80   | 5   | 1.25E-01 | 1.000 | cytosolic calcium ion homeostasis                                                                            |
| GO:0006066 | PROCESS  | 340  | 13  | 1.25E-01 | 1.000 | alcohol metabolic process                                                                                    |
| GO:0045137 | PROCESS  | 80   | 4   | 1.28E-01 | 1.000 | development of primary sexual characteristics                                                                |
| GO:0004702 | FUNCTION | 57   | 4   | 1.28E-01 | 1.000 | receptor signaling protein serine/threonine kinase activity                                                  |
| GO:0048747 | PROCESS  | 47   | 4   | 1.29E-01 | 1.000 | muscle fiber development                                                                                     |
| GO:0010942 | PROCESS  | 308  | 13  | 1.29E-01 | 1.000 | positive regulation of cell death                                                                            |
| GO:0004623 | FUNCTION | 25   | 2   | 1.29E-01 | 1.000 | phospholipase A2 activity                                                                                    |
| GO:0051180 | PROCESS  | 21   | 2   | 1.30E-01 | 1.000 | vitamin transport                                                                                            |
| GO:0044459 | CELLULAR | 1964 | 89  | 1.30E-01 | 1.000 | plasma membrane part                                                                                         |
| GO:0044085 | PROCESS  | 742  | 23  | 1.31E-01 | 1.000 | cellular component biogenesis                                                                                |
| GO:0046903 | PROCESS  | 216  | 12  | 1.31E-01 | 1.000 | secretion                                                                                                    |
| GO:0019935 | PROCESS  | 110  | 6   | 1.32E-01 | 1.000 | cyclic-nucleotide-mediated signaling                                                                         |
| GO:0019439 | PROCESS  | 17   | 2   | 1.33E-01 | 1.000 | aromatic compound catabolic process                                                                          |
| GO:0016747 | FUNCTION | 180  | 7   | 1.35E-01 | 1.000 | transferase activity, transferring acyl groups other than amino-acyl groups                                  |
| GO:0005540 | FUNCTION | 19   | 2   | 1.35E-01 | 1.000 | hyaluronic acid binding                                                                                      |
| GO:0015301 | FUNCTION | 19   | 2   | 1.35E-01 | 1.000 | anion:anion antiporter activity                                                                              |
| GO:0032879 | PROCESS  | 486  | 21  | 1.36E-01 | 1.000 | regulation of localization                                                                                   |
| GO:0016208 | FUNCTION | 16   | 2   | 1.36E-01 | 1.000 | AMP binding                                                                                                  |
| GO:0030247 | FUNCTION | 130  | 7   | 1.36E-01 | 1.000 | polysaccharide binding                                                                                       |
| GO:0001871 | FUNCTION | 130  | 7   | 1.36E-01 | 1.000 | pattern binding                                                                                              |
| GO:0016529 | CELLULAR | 32   | 4   | 1.36E-01 | 1.000 | sarcoplasmic reticulum                                                                                       |
| GO:0030183 | PROCESS  | 33   | 3   | 1.37E-01 | 1.000 | B cell differentiation                                                                                       |
| GO:0015491 | FUNCTION | 15   | 3   | 1.37E-01 | 1.000 | cation:cation antiporter activity                                                                            |
| GO:0005792 | CELLULAR | 174  | 7   | 1.39E-01 | 1.000 | microsome                                                                                                    |
| GO:0016050 | PROCESS  | 48   | 3   | 1.41E-01 | 1.000 | vesicle organization                                                                                         |
| GO:0031625 | FUNCTION | 30   | 2   | 1.41E-01 | 1.000 | ubiquitin protein ligase binding                                                                             |
| GO:0022403 | PROCESS  | 366  | 11  | 1.41E-01 | 1.000 | cell cycle phase                                                                                             |
| GO:0005219 | FUNCTION | 5    | 2   | 1.41E-01 | 1.000 | ryanodine-sensitive calcium-release channel activity                                                         |
| GO:0005218 | FUNCTION | 5    | 2   | 1.41E-01 | 1.000 | intracellular ligand-gated calcium channel activity                                                          |
| GO:0051345 | PROCESS  | 154  | 7   | 1.41E-01 | 1.000 | positive regulation of hydrolase activity                                                                    |
| GO:0006644 | PROCESS  | 164  | 7   | 1.42E-01 | 1.000 | phospholipid metabolic process                                                                               |

|            |          |      |    |          |       |                                                                 |
|------------|----------|------|----|----------|-------|-----------------------------------------------------------------|
| GO:0065008 | PROCESS  | 1109 | 41 | 1.42E-01 | 1.000 | regulation of biological quality                                |
| GO:0005902 | CELLULAR | 25   | 3  | 1.42E-01 | 1.000 | microvillus                                                     |
| GO:0001664 | FUNCTION | 82   | 3  | 1.43E-01 | 1.000 | G-protein-coupled receptor binding                              |
| GO:0005905 | CELLULAR | 41   | 3  | 1.44E-01 | 1.000 | coated pit                                                      |
| GO:0016746 | FUNCTION | 188  | 7  | 1.45E-01 | 1.000 | transferase activity, transferring acyl groups                  |
| GO:0034621 | PROCESS  | 302  | 8  | 1.45E-01 | 1.000 | cellular macromolecular complex subunit organization            |
| GO:0043122 | PROCESS  | 97   | 4  | 1.46E-01 | 1.000 | regulation of I-kappaB kinase/NF-kappaB cascade                 |
| GO:0019787 | FUNCTION | 141  | 6  | 1.46E-01 | 1.000 | small conjugating protein ligase activity                       |
| GO:0008194 | FUNCTION | 112  | 7  | 1.46E-01 | 1.000 | UDP-glycosyltransferase activity                                |
| GO:0016528 | CELLULAR | 33   | 4  | 1.46E-01 | 1.000 | sarcoplasm                                                      |
| GO:0006941 | PROCESS  | 30   | 3  | 1.49E-01 | 1.000 | striated muscle contraction                                     |
| GO:0005777 | CELLULAR | 97   | 4  | 1.49E-01 | 1.000 | peroxisome                                                      |
| GO:0042579 | CELLULAR | 97   | 4  | 1.49E-01 | 1.000 | microbody                                                       |
| GO:0031410 | CELLULAR | 543  | 21 | 1.50E-01 | 1.000 | cytoplasmic vesicle                                             |
| GO:0000287 | FUNCTION | 420  | 19 | 1.50E-01 | 1.000 | magnesium ion binding                                           |
| GO:0001525 | PROCESS  | 109  | 7  | 1.51E-01 | 1.000 | angiogenesis                                                    |
| GO:0010926 | PROCESS  | 839  | 29 | 1.51E-01 | 1.000 | anatomical structure formation                                  |
| GO:0043623 | PROCESS  | 136  | 5  | 1.52E-01 | 1.000 | cellular protein complex assembly                               |
| GO:0016023 | CELLULAR | 459  | 18 | 1.52E-01 | 1.000 | cytoplasmic membrane-bounded vesicle                            |
| GO:0009066 | PROCESS  | 22   | 2  | 1.52E-01 | 1.000 | aspartate family amino acid metabolic process                   |
| GO:0005548 | FUNCTION | 28   | 4  | 1.53E-01 | 1.000 | phospholipid transporter activity                               |
| GO:0044257 | PROCESS  | 523  | 15 | 1.54E-01 | 1.000 | cellular protein catabolic process                              |
| GO:0008584 | PROCESS  | 29   | 2  | 1.55E-01 | 1.000 | male gonad development                                          |
| GO:0019637 | PROCESS  | 170  | 7  | 1.56E-01 | 1.000 | organophosphate metabolic process                               |
| GO:0032991 | CELLULAR | 2674 | 73 | 1.58E-01 | 1.000 | macromolecular complex                                          |
| GO:0008080 | FUNCTION | 65   | 3  | 1.58E-01 | 1.000 | N-acetyltransferase activity                                    |
| GO:0008239 | FUNCTION | 10   | 2  | 1.60E-01 | 1.000 | dipeptidyl-peptidase activity                                   |
| GO:0019229 | PROCESS  | 18   | 2  | 1.60E-01 | 1.000 | regulation of vasoconstriction                                  |
| GO:0042472 | PROCESS  | 41   | 2  | 1.60E-01 | 1.000 | inner ear morphogenesis                                         |
| GO:0043085 | PROCESS  | 432  | 16 | 1.61E-01 | 1.000 | positive regulation of catalytic activity                       |
| GO:0005251 | FUNCTION | 12   | 2  | 1.61E-01 | 1.000 | delayed rectifier potassium channel activity                    |
| GO:0006790 | PROCESS  | 94   | 6  | 1.61E-01 | 1.000 | sulfur metabolic process                                        |
| GO:0031968 | CELLULAR | 91   | 4  | 1.62E-01 | 1.000 | organelle outer membrane                                        |
| GO:0005615 | CELLULAR | 585  | 20 | 1.62E-01 | 1.000 | extracellular space                                             |
| GO:0015277 | FUNCTION | 7    | 2  | 1.63E-01 | 1.000 | kainate selective glutamate receptor activity                   |
| GO:0031226 | CELLULAR | 1123 | 50 | 1.64E-01 | 1.000 | intrinsic to plasma membrane                                    |
| GO:0042598 | CELLULAR | 179  | 7  | 1.64E-01 | 1.000 | vesicular fraction                                              |
| GO:0007519 | PROCESS  | 59   | 4  | 1.65E-01 | 1.000 | skeletal muscle tissue development                              |
| GO:0060538 | PROCESS  | 59   | 4  | 1.65E-01 | 1.000 | skeletal muscle organ development                               |
| GO:0031988 | CELLULAR | 465  | 18 | 1.65E-01 | 1.000 | membrane-bounded vesicle                                        |
| GO:0001948 | FUNCTION | 20   | 3  | 1.66E-01 | 1.000 | glycoprotein binding                                            |
| GO:0031982 | CELLULAR | 552  | 21 | 1.67E-01 | 1.000 | vesicle                                                         |
| GO:0007157 | PROCESS  | 18   | 2  | 1.68E-01 | 1.000 | heterophilic cell adhesion                                      |
| GO:0005773 | CELLULAR | 222  | 8  | 1.70E-01 | 1.000 | vacuole                                                         |
| GO:0043065 | PROCESS  | 303  | 12 | 1.70E-01 | 1.000 | positive regulation of apoptosis                                |
| GO:0008610 | PROCESS  | 290  | 11 | 1.72E-01 | 1.000 | lipid biosynthetic process                                      |
| GO:0005024 | FUNCTION | 16   | 2  | 1.72E-01 | 1.000 | transforming growth factor beta receptor activity               |
| GO:0004675 | FUNCTION | 16   | 2  | 1.72E-01 | 1.000 | transmembrane receptor protein serine/threonine kinase activity |
| GO:0008188 | FUNCTION | 37   | 3  | 1.72E-01 | 1.000 | neuropeptide receptor activity                                  |
| GO:0046890 | PROCESS  | 30   | 2  | 1.72E-01 | 1.000 | regulation of lipid biosynthetic process                        |
| GO:0004857 | FUNCTION | 248  | 9  | 1.74E-01 | 1.000 | enzyme inhibitor activity                                       |
| GO:0044419 | PROCESS  | 265  | 9  | 1.75E-01 | 1.000 | interspecies interaction between organisms                      |
| GO:0016043 | PROCESS  | 1996 | 67 | 1.77E-01 | 1.000 | cellular component organization                                 |
| GO:0004115 | FUNCTION | 7    | 2  | 1.77E-01 | 1.000 | 3',5'-cyclic-AMP phosphodiesterase activity                     |
| GO:0042923 | FUNCTION | 38   | 3  | 1.78E-01 | 1.000 | neuropeptide binding                                            |
| GO:0032318 | PROCESS  | 94   | 5  | 1.80E-01 | 1.000 | regulation of Ras GTPase activity                               |
| GO:0031091 | CELLULAR | 93   | 3  | 1.80E-01 | 1.000 | platelet alpha granule                                          |
| GO:0019867 | CELLULAR | 54   | 4  | 1.81E-01 | 1.000 | outer membrane                                                  |
| GO:0043395 | FUNCTION | 5    | 2  | 1.82E-01 | 1.000 | heparan sulfate proteoglycan binding                            |
| GO:0015031 | PROCESS  | 679  | 22 | 1.82E-01 | 1.000 | protein transport                                               |
| GO:0010883 | PROCESS  | 19   | 2  | 1.83E-01 | 1.000 | regulation of lipid storage                                     |
| GO:0008643 | PROCESS  | 57   | 3  | 1.83E-01 | 1.000 | carbohydrate transport                                          |
| GO:0009306 | PROCESS  | 20   | 2  | 1.86E-01 | 1.000 | protein secretion                                               |
| GO:0006909 | PROCESS  | 39   | 3  | 1.86E-01 | 1.000 | phagocytosis                                                    |
| GO:0007631 | PROCESS  | 44   | 3  | 1.87E-01 | 1.000 | feeding behavior                                                |
| GO:0051099 | PROCESS  | 56   | 3  | 1.87E-01 | 1.000 | positive regulation of binding                                  |
| GO:0032101 | PROCESS  | 114  | 6  | 1.88E-01 | 1.000 | regulation of response to external stimulus                     |
| GO:0055037 | CELLULAR | 18   | 2  | 1.88E-01 | 1.000 | recycling endosome                                              |
| GO:0045884 | PROCESS  | 19   | 2  | 1.90E-01 | 1.000 | regulation of survival gene product expression                  |
| GO:0042102 | PROCESS  | 30   | 2  | 1.90E-01 | 1.000 | positive regulation of T cell proliferation                     |
| GO:0070011 | FUNCTION | 514  | 19 | 1.90E-01 | 1.000 | peptidase activity, acting on L-amino acid peptides             |
| GO:0032934 | FUNCTION | 22   | 2  | 1.90E-01 | 1.000 | sterol binding                                                  |
| GO:0008284 | PROCESS  | 306  | 11 | 1.91E-01 | 1.000 | positive regulation of cell proliferation                       |
| GO:0080134 | PROCESS  | 195  | 7  | 1.91E-01 | 1.000 | regulation of response to stress                                |
| GO:0022804 | FUNCTION | 319  | 17 | 1.91E-01 | 1.000 | active transmembrane transporter activity                       |
| GO:0005793 | CELLULAR | 39   | 2  | 1.91E-01 | 1.000 | ER-Golgi intermediate compartment                               |
| GO:0019538 | PROCESS  | 2511 | 74 | 1.91E-01 | 1.000 | protein metabolic process                                       |
| GO:0010467 | PROCESS  | 1099 | 26 | 1.92E-01 | 1.000 | gene expression                                                 |
| GO:0004521 | FUNCTION | 43   | 2  | 1.92E-01 | 1.000 | endoribonuclease activity                                       |

|            |          |      |    |          |       |                                                                                           |
|------------|----------|------|----|----------|-------|-------------------------------------------------------------------------------------------|
| GO:0050808 | PROCESS  | 36   | 3  | 1.92E-01 | 1.000 | synapse organization                                                                      |
| GO:0007586 | PROCESS  | 79   | 4  | 1.93E-01 | 1.000 | digestion                                                                                 |
| GO:0016573 | PROCESS  | 45   | 2  | 1.93E-01 | 1.000 | histone acetylation                                                                       |
| GO:0060627 | PROCESS  | 73   | 4  | 1.95E-01 | 1.000 | regulation of vesicle-mediated transport                                                  |
| GO:0006816 | PROCESS  | 112  | 10 | 1.95E-01 | 1.000 | calcium ion transport                                                                     |
| GO:0043565 | FUNCTION | 524  | 17 | 1.95E-01 | 1.000 | sequence-specific DNA binding                                                             |
| GO:0005740 | CELLULAR | 347  | 9  | 1.95E-01 | 1.000 | mitochondrial envelope                                                                    |
| GO:0070838 | PROCESS  | 113  | 10 | 1.96E-01 | 1.000 | divalent metal ion transport                                                              |
| GO:0045184 | PROCESS  | 685  | 22 | 1.97E-01 | 1.000 | establishment of protein localization                                                     |
| GO:0044057 | PROCESS  | 190  | 11 | 1.99E-01 | 1.000 | regulation of system process                                                              |
| GO:0008289 | FUNCTION | 455  | 20 | 1.99E-01 | 1.000 | lipid binding                                                                             |
| GO:0004402 | FUNCTION | 36   | 2  | 2.00E-01 | 1.000 | histone acetyltransferase activity                                                        |
| GO:0004468 | FUNCTION | 36   | 2  | 2.00E-01 | 1.000 | lysine N-acetyltransferase activity                                                       |
| GO:0007187 | PROCESS  | 100  | 5  | 2.01E-01 | 1.000 | G-protein signaling, coupled to cyclic nucleotide second messenger                        |
| GO:0016757 | FUNCTION | 250  | 11 | 2.01E-01 | 1.000 | transferase activity, transferring glycosyl groups                                        |
| GO:0065009 | PROCESS  | 814  | 27 | 2.01E-01 | 1.000 | regulation of molecular function                                                          |
| GO:0050877 | PROCESS  | 1010 | 34 | 2.01E-01 | 1.000 | neurological system process                                                               |
| GO:0051056 | PROCESS  | 228  | 13 | 2.02E-01 | 1.000 | regulation of small GTPase mediated signal transduction                                   |
| GO:0005179 | FUNCTION | 102  | 3  | 2.02E-01 | 1.000 | hormone activity                                                                          |
| GO:0018130 | PROCESS  | 41   | 2  | 2.03E-01 | 1.000 | heterocycle biosynthetic process                                                          |
| GO:0051701 | PROCESS  | 27   | 2  | 2.03E-01 | 1.000 | interaction with host                                                                     |
| GO:0015299 | FUNCTION | 19   | 2  | 2.04E-01 | 1.000 | solute:hydrogen antiporter activity                                                       |
| GO:0070647 | PROCESS  | 132  | 5  | 2.04E-01 | 1.000 | protein modification by small protein conjugation or removal                              |
| GO:0006473 | PROCESS  | 48   | 2  | 2.07E-01 | 1.000 | protein amino acid acetylation                                                            |
| GO:0051246 | PROCESS  | 467  | 15 | 2.08E-01 | 1.000 | regulation of protein metabolic process                                                   |
| GO:0016197 | PROCESS  | 47   | 3  | 2.08E-01 | 1.000 | endosome transport                                                                        |
| GO:0016570 | PROCESS  | 104  | 4  | 2.09E-01 | 1.000 | histone modification                                                                      |
| GO:0006800 | PROCESS  | 51   | 3  | 2.10E-01 | 1.000 | oxygen and reactive oxygen species metabolic process                                      |
| GO:0035258 | FUNCTION | 36   | 2  | 2.10E-01 | 1.000 | steroid hormone receptor binding                                                          |
| GO:0008233 | FUNCTION | 530  | 19 | 2.10E-01 | 1.000 | peptidase activity                                                                        |
| GO:0016758 | FUNCTION | 170  | 8  | 2.10E-01 | 1.000 | transferase activity, transferring hexosyl groups                                         |
| GO:0031333 | PROCESS  | 29   | 2  | 2.11E-01 | 1.000 | negative regulation of protein complex assembly                                           |
| GO:0031267 | FUNCTION | 72   | 5  | 2.11E-01 | 1.000 | small GTPase binding                                                                      |
| GO:0044272 | PROCESS  | 45   | 3  | 2.11E-01 | 1.000 | sulfur compound biosynthetic process                                                      |
| GO:0008219 | PROCESS  | 550  | 19 | 2.12E-01 | 1.000 | cell death                                                                                |
| GO:0007229 | PROCESS  | 55   | 4  | 2.12E-01 | 1.000 | integrin-mediated signaling pathway                                                       |
| GO:0008374 | FUNCTION | 36   | 2  | 2.12E-01 | 1.000 | O-acyltransferase activity                                                                |
| GO:0004896 | FUNCTION | 48   | 3  | 2.15E-01 | 1.000 | cytokine receptor activity                                                                |
| GO:0016569 | PROCESS  | 106  | 4  | 2.16E-01 | 1.000 | covalent chromatin modification                                                           |
| GO:0004519 | FUNCTION | 90   | 3  | 2.17E-01 | 1.000 | endonuclease activity                                                                     |
| GO:0030334 | PROCESS  | 159  | 8  | 2.17E-01 | 1.000 | regulation of cell migration                                                              |
| GO:0001726 | CELLULAR | 56   | 3  | 2.17E-01 | 1.000 | ruffle                                                                                    |
| GO:0015298 | FUNCTION | 26   | 3  | 2.18E-01 | 1.000 | solute:cation antiporter activity                                                         |
| GO:0015293 | FUNCTION | 121  | 7  | 2.18E-01 | 1.000 | symporter activity                                                                        |
| GO:0004653 | FUNCTION | 19   | 3  | 2.18E-01 | 1.000 | polypeptide N-acetylgalactosaminyltransferase activity                                    |
| GO:0016265 | PROCESS  | 554  | 19 | 2.19E-01 | 1.000 | death                                                                                     |
| GO:0042562 | FUNCTION | 29   | 3  | 2.20E-01 | 1.000 | hormone binding                                                                           |
| GO:0000279 | PROCESS  | 299  | 8  | 2.21E-01 | 1.000 | M phase                                                                                   |
| GO:0016486 | PROCESS  | 13   | 2  | 2.21E-01 | 1.000 | peptide hormone processing                                                                |
| GO:0030516 | PROCESS  | 12   | 2  | 2.21E-01 | 1.000 | regulation of axon extension                                                              |
| GO:0030246 | FUNCTION | 303  | 12 | 2.25E-01 | 1.000 | carbohydrate binding                                                                      |
| GO:0050927 | PROCESS  | 12   | 2  | 2.25E-01 | 1.000 | positive regulation of positive chemotaxis                                                |
| GO:0050926 | PROCESS  | 12   | 2  | 2.25E-01 | 1.000 | regulation of positive chemotaxis                                                         |
| GO:0008528 | FUNCTION | 97   | 5  | 2.26E-01 | 1.000 | peptide receptor activity, G-protein coupled                                              |
| GO:0030175 | CELLULAR | 24   | 2  | 2.27E-01 | 1.000 | filopodium                                                                                |
| GO:0003700 | FUNCTION | 880  | 26 | 2.28E-01 | 1.000 | transcription factor activity                                                             |
| GO:0048514 | PROCESS  | 152  | 8  | 2.28E-01 | 1.000 | blood vessel morphogenesis                                                                |
| GO:0008047 | FUNCTION | 305  | 15 | 2.29E-01 | 1.000 | enzyme activator activity                                                                 |
| GO:0016407 | FUNCTION | 78   | 3  | 2.29E-01 | 1.000 | acetyltransferase activity                                                                |
| GO:0030141 | CELLULAR | 139  | 6  | 2.30E-01 | 1.000 | secretory granule                                                                         |
| GO:0051603 | PROCESS  | 521  | 14 | 2.30E-01 | 1.000 | proteolysis involved in cellular protein catabolic process                                |
| GO:0007186 | PROCESS  | 950  | 25 | 2.30E-01 | 1.000 | G-protein coupled receptor protein signaling pathway                                      |
| GO:0016814 | FUNCTION | 30   | 2  | 2.30E-01 | 1.000 | hydrolase activity, acting on carbon-nitrogen (but not peptide) bonds, in cyclic amidines |
| GO:0008237 | FUNCTION | 172  | 9  | 2.34E-01 | 1.000 | metallopeptidase activity                                                                 |
| GO:0008629 | PROCESS  | 41   | 2  | 2.34E-01 | 1.000 | induction of apoptosis by intracellular signals                                           |
| GO:0005057 | FUNCTION | 153  | 8  | 2.35E-01 | 1.000 | receptor signaling protein activity                                                       |
| GO:0030234 | FUNCTION | 759  | 31 | 2.35E-01 | 1.000 | enzyme regulator activity                                                                 |
| GO:0050671 | PROCESS  | 37   | 2  | 2.36E-01 | 1.000 | positive regulation of lymphocyte proliferation                                           |
| GO:0008236 | FUNCTION | 174  | 7  | 2.36E-01 | 1.000 | serine-type peptidase activity                                                            |
| GO:0043087 | PROCESS  | 106  | 5  | 2.38E-01 | 1.000 | regulation of GTPase activity                                                             |
| GO:0008081 | FUNCTION | 81   | 6  | 2.39E-01 | 1.000 | phosphoric diester hydrolase activity                                                     |
| GO:0043025 | CELLULAR | 73   | 4  | 2.39E-01 | 1.000 | cell soma                                                                                 |
| GO:0030228 | FUNCTION | 14   | 2  | 2.40E-01 | 1.000 | lipoprotein receptor activity                                                             |
| GO:0005230 | FUNCTION | 67   | 5  | 2.41E-01 | 1.000 | extracellular ligand-gated ion channel activity                                           |
| GO:0000777 | CELLULAR | 48   | 2  | 2.41E-01 | 1.000 | condensed chromosome kinetochore                                                          |
| GO:0043394 | FUNCTION | 7    | 2  | 2.42E-01 | 1.000 | proteoglycan binding                                                                      |
| GO:0042277 | FUNCTION | 169  | 8  | 2.43E-01 | 1.000 | peptide binding                                                                           |
| GO:0017171 | FUNCTION | 176  | 7  | 2.43E-01 | 1.000 | serine hydrolase activity                                                                 |



|            |          |      |    |          |       |                                                                             |
|------------|----------|------|----|----------|-------|-----------------------------------------------------------------------------|
| GO:0005626 | CELLULAR | 628  | 26 | 2.45E-01 | 1.000 | insoluble fraction                                                          |
| GO:0008406 | PROCESS  | 68   | 3  | 2.45E-01 | 1.000 | gonad development                                                           |
| GO:0032946 | PROCESS  | 38   | 2  | 2.46E-01 | 1.000 | positive regulation of mononuclear cell proliferation                       |
| GO:0070665 | PROCESS  | 38   | 2  | 2.46E-01 | 1.000 | positive regulation of leukocyte proliferation                              |
| GO:0046486 | PROCESS  | 127  | 5  | 2.46E-01 | 1.000 | glycerolipid metabolic process                                              |
| GO:0009190 | PROCESS  | 22   | 2  | 2.47E-01 | 1.000 | cyclic nucleotide biosynthetic process                                      |
| GO:0016787 | FUNCTION | 2094 | 66 | 2.47E-01 | 1.000 | hydrolase activity                                                          |
| GO:0008624 | PROCESS  | 59   | 3  | 2.47E-01 | 1.000 | induction of apoptosis by extracellular signals                             |
| GO:0060402 | PROCESS  | 14   | 2  | 2.47E-01 | 1.000 | calcium ion transport into cytosol                                          |
| GO:0051128 | PROCESS  | 362  | 14 | 2.48E-01 | 1.000 | regulation of cellular component organization                               |
| GO:0030335 | PROCESS  | 70   | 4  | 2.48E-01 | 1.000 | positive regulation of cell migration                                       |
| GO:0005938 | CELLULAR | 104  | 5  | 2.49E-01 | 1.000 | cell cortex                                                                 |
| GO:0003725 | FUNCTION | 30   | 2  | 2.50E-01 | 1.000 | double-stranded RNA binding                                                 |
| GO:0031329 | PROCESS  | 39   | 2  | 2.50E-01 | 1.000 | regulation of cellular catabolic process                                    |
| GO:0016410 | FUNCTION | 77   | 3  | 2.50E-01 | 1.000 | N-acyltransferase activity                                                  |
| GO:0016765 | FUNCTION | 47   | 2  | 2.50E-01 | 1.000 | transferase activity, transferring alkyl or aryl (other than methyl) groups |
| GO:0051651 | PROCESS  | 41   | 2  | 2.51E-01 | 1.000 | maintenance of location in cell                                             |
| GO:0044450 | CELLULAR | 44   | 2  | 2.52E-01 | 1.000 | microtubule organizing center part                                          |
| GO:0007605 | PROCESS  | 80   | 6  | 2.53E-01 | 1.000 | sensory perception of sound                                                 |
| GO:0008277 | PROCESS  | 48   | 3  | 2.53E-01 | 1.000 | regulation of G-protein coupled receptor protein signaling pathway          |
| GO:0001701 | PROCESS  | 115  | 5  | 2.54E-01 | 1.000 | in utero embryonic development                                              |
| GO:0006952 | PROCESS  | 514  | 15 | 2.55E-01 | 1.000 | defense response                                                            |
| GO:0009897 | CELLULAR | 114  | 8  | 2.55E-01 | 1.000 | external side of plasma membrane                                            |
| GO:0051705 | PROCESS  | 17   | 2  | 2.56E-01 | 1.000 | behavioral interaction between organisms                                    |
| GO:0044448 | CELLULAR | 60   | 3  | 2.56E-01 | 1.000 | cell cortex part                                                            |
| GO:0019898 | CELLULAR | 461  | 21 | 2.57E-01 | 1.000 | extrinsic to membrane                                                       |
| GO:0045471 | PROCESS  | 23   | 2  | 2.58E-01 | 1.000 | response to ethanol                                                         |
| GO:0006887 | PROCESS  | 86   | 5  | 2.60E-01 | 1.000 | exocytosis                                                                  |
| GO:0000775 | CELLULAR | 106  | 3  | 2.61E-01 | 1.000 | chromosome, centromeric region                                              |
| GO:0030667 | CELLULAR | 20   | 2  | 2.62E-01 | 1.000 | secretory granule membrane                                                  |
| GO:0022402 | PROCESS  | 506  | 13 | 2.64E-01 | 1.000 | cell cycle process                                                          |
| GO:0016788 | FUNCTION | 638  | 22 | 2.64E-01 | 1.000 | hydrolase activity, acting on ester bonds                                   |
| GO:0042129 | PROCESS  | 43   | 2  | 2.64E-01 | 1.000 | regulation of T cell proliferation                                          |
| GO:0019955 | FUNCTION | 97   | 4  | 2.64E-01 | 1.000 | cytokine binding                                                            |
| GO:0031966 | CELLULAR | 326  | 8  | 2.65E-01 | 1.000 | mitochondrial membrane                                                      |
| GO:0015103 | FUNCTION | 30   | 2  | 2.65E-01 | 1.000 | inorganic anion transmembrane transporter activity                          |
| GO:0034622 | PROCESS  | 269  | 6  | 2.66E-01 | 1.000 | cellular macromolecular complex assembly                                    |
| GO:0006164 | PROCESS  | 130  | 6  | 2.66E-01 | 1.000 | purine nucleotide biosynthetic process                                      |
| GO:0008270 | FUNCTION | 2124 | 60 | 2.67E-01 | 1.000 | zinc ion binding                                                            |
| GO:0006029 | PROCESS  | 34   | 3  | 2.68E-01 | 1.000 | proteoglycan metabolic process                                              |
| GO:0080135 | PROCESS  | 80   | 3  | 2.68E-01 | 1.000 | regulation of cellular response to stress                                   |
| GO:0008016 | PROCESS  | 60   | 4  | 2.69E-01 | 1.000 | regulation of heart contraction                                             |
| GO:0007268 | PROCESS  | 235  | 14 | 2.69E-01 | 1.000 | synaptic transmission                                                       |
| GO:0043543 | PROCESS  | 54   | 2  | 2.70E-01 | 1.000 | protein amino acid acylation                                                |
| GO:0009895 | PROCESS  | 35   | 2  | 2.71E-01 | 1.000 | negative regulation of catabolic process                                    |
| GO:0010743 | PROCESS  | 25   | 2  | 2.71E-01 | 1.000 | regulation of macrophage derived foam cell differentiation                  |
| GO:0017016 | FUNCTION | 64   | 4  | 2.72E-01 | 1.000 | Ras GTPase binding                                                          |
| GO:0030414 | FUNCTION | 141  | 5  | 2.74E-01 | 1.000 | peptidase inhibitor activity                                                |
| GO:0016849 | FUNCTION | 20   | 2  | 2.76E-01 | 1.000 | phosphorus-oxygen lyase activity                                            |
| GO:0007067 | PROCESS  | 201  | 5  | 2.77E-01 | 1.000 | mitosis                                                                     |
| GO:0000280 | PROCESS  | 201  | 5  | 2.77E-01 | 1.000 | nuclear division                                                            |
| GO:0034962 | PROCESS  | 635  | 16 | 2.77E-01 | 1.000 | cellular biopolymer catabolic process                                       |
| GO:0050896 | PROCESS  | 2795 | 74 | 2.77E-01 | 1.000 | response to stimulus                                                        |
| GO:0001709 | PROCESS  | 29   | 2  | 2.78E-01 | 1.000 | cell fate determination                                                     |
| GO:0001894 | PROCESS  | 33   | 2  | 2.78E-01 | 1.000 | tissue homeostasis                                                          |
| GO:0044433 | CELLULAR | 154  | 7  | 2.79E-01 | 1.000 | cytoplasmic vesicle part                                                    |
| GO:0048661 | PROCESS  | 16   | 2  | 2.80E-01 | 1.000 | positive regulation of smooth muscle cell proliferation                     |
| GO:0051272 | PROCESS  | 75   | 4  | 2.80E-01 | 1.000 | positive regulation of cell motion                                          |
| GO:0043067 | PROCESS  | 616  | 20 | 2.81E-01 | 1.000 | regulation of programmed cell death                                         |
| GO:0043123 | PROCESS  | 89   | 3  | 2.81E-01 | 1.000 | positive regulation of I-kappaB kinase/NF-kappaB cascade                    |
| GO:0017111 | FUNCTION | 657  | 23 | 2.82E-01 | 1.000 | nucleoside-triphosphatase activity                                          |
| GO:0000779 | CELLULAR | 53   | 2  | 2.82E-01 | 1.000 | condensed chromosome, centromeric region                                    |
| GO:0044265 | PROCESS  | 690  | 17 | 2.82E-01 | 1.000 | cellular macromolecule catabolic process                                    |
| GO:0017137 | FUNCTION | 20   | 2  | 2.82E-01 | 1.000 | Rab GTPase binding                                                          |
| GO:0006163 | PROCESS  | 155  | 7  | 2.82E-01 | 1.000 | purine nucleotide metabolic process                                         |
| GO:0006885 | PROCESS  | 26   | 2  | 2.82E-01 | 1.000 | regulation of pH                                                            |
| GO:0048871 | PROCESS  | 34   | 2  | 2.84E-01 | 1.000 | multicellular organismal homeostasis                                        |
| GO:0046914 | FUNCTION | 2560 | 73 | 2.84E-01 | 1.000 | transition metal ion binding                                                |
| GO:0010941 | PROCESS  | 618  | 20 | 2.84E-01 | 1.000 | regulation of cell death                                                    |
| GO:0060193 | PROCESS  | 61   | 3  | 2.85E-01 | 1.000 | positive regulation of lipase activity                                      |
| GO:0006979 | PROCESS  | 106  | 4  | 2.86E-01 | 1.000 | response to oxidative stress                                                |
| GO:0005096 | FUNCTION | 204  | 11 | 2.86E-01 | 1.000 | GTPase activator activity                                                   |
| GO:0000087 | PROCESS  | 203  | 5  | 2.87E-01 | 1.000 | M phase of mitotic cell cycle                                               |
| GO:0006916 | PROCESS  | 172  | 6  | 2.87E-01 | 1.000 | anti-apoptosis                                                              |
| GO:0007127 | PROCESS  | 36   | 2  | 2.89E-01 | 1.000 | meiosis I                                                                   |
| GO:0051301 | PROCESS  | 266  | 7  | 2.89E-01 | 1.000 | cell division                                                               |
| GO:0009892 | PROCESS  | 618  | 19 | 2.91E-01 | 1.000 | negative regulation of metabolic process                                    |
| GO:0030802 | PROCESS  | 88   | 5  | 2.92E-01 | 1.000 | regulation of cyclic nucleotide biosynthetic process                        |
| GO:0030808 | PROCESS  | 88   | 5  | 2.92E-01 | 1.000 | regulation of nucleotide biosynthetic process                               |

|            |          |      |    |          |       |                                                                                      |
|------------|----------|------|----|----------|-------|--------------------------------------------------------------------------------------|
| GO:0045177 | CELLULAR | 107  | 6  | 2.92E-01 | 1.000 | apical part of cell                                                                  |
| GO:0005903 | CELLULAR | 31   | 2  | 2.94E-01 | 1.000 | brush border                                                                         |
| GO:0051248 | PROCESS  | 132  | 5  | 2.94E-01 | 1.000 | negative regulation of protein metabolic process                                     |
| GO:0043234 | CELLULAR | 2177 | 63 | 2.95E-01 | 1.000 | protein complex                                                                      |
| GO:0008217 | PROCESS  | 69   | 3  | 2.95E-01 | 1.000 | regulation of blood pressure                                                         |
| GO:0016836 | FUNCTION | 40   | 2  | 2.95E-01 | 1.000 | hydro-lyase activity                                                                 |
| GO:0051020 | FUNCTION | 78   | 5  | 2.96E-01 | 1.000 | GTPase binding                                                                       |
| GO:0048522 | PROCESS  | 1406 | 44 | 2.96E-01 | 1.000 | positive regulation of cellular process                                              |
| GO:0048839 | PROCESS  | 55   | 3  | 2.96E-01 | 1.000 | inner ear development                                                                |
| GO:0003702 | FUNCTION | 216  | 7  | 2.97E-01 | 1.000 | RNA polymerase II transcription factor activity                                      |
| GO:0051704 | PROCESS  | 553  | 15 | 2.97E-01 | 1.000 | multi-organism process                                                               |
| GO:0048608 | PROCESS  | 77   | 3  | 2.97E-01 | 1.000 | reproductive structure development                                                   |
| GO:0001568 | PROCESS  | 171  | 8  | 2.98E-01 | 1.000 | blood vessel development                                                             |
| GO:0009975 | FUNCTION | 21   | 2  | 2.99E-01 | 1.000 | cyclase activity                                                                     |
| GO:0007517 | PROCESS  | 176  | 8  | 2.99E-01 | 1.000 | muscle organ development                                                             |
| GO:0005275 | FUNCTION | 66   | 4  | 2.99E-01 | 1.000 | amine transmembrane transporter activity                                             |
| GO:0048285 | PROCESS  | 208  | 5  | 3.00E-01 | 1.000 | organelle fission                                                                    |
| GO:0000398 | PROCESS  | 140  | 3  | 3.04E-01 | 1.000 | nuclear mRNA splicing, via spliceosome                                               |
| GO:0000377 | PROCESS  | 140  | 3  | 3.04E-01 | 1.000 | RNA splicing, via transesterification reactions with bulged adenosine as nucleophile |
| GO:0000375 | PROCESS  | 140  | 3  | 3.04E-01 | 1.000 | RNA splicing, via transesterification reactions                                      |
| GO:0030145 | FUNCTION | 146  | 7  | 3.04E-01 | 1.000 | manganese ion binding                                                                |
| GO:0008064 | PROCESS  | 49   | 2  | 3.06E-01 | 1.000 | regulation of actin polymerization or depolymerization                               |
| GO:0006518 | PROCESS  | 46   | 2  | 3.06E-01 | 1.000 | peptide metabolic process                                                            |
| GO:0040012 | PROCESS  | 174  | 8  | 3.07E-01 | 1.000 | regulation of locomotion                                                             |
| GO:0000278 | PROCESS  | 328  | 8  | 3.08E-01 | 1.000 | mitotic cell cycle                                                                   |
| GO:0051252 | PROCESS  | 1601 | 40 | 3.10E-01 | 1.000 | regulation of RNA metabolic process                                                  |
| GO:0003704 | FUNCTION | 34   | 2  | 3.11E-01 | 1.000 | specific RNA polymerase II transcription factor activity                             |
| GO:0016044 | PROCESS  | 313  | 12 | 3.11E-01 | 1.000 | membrane organization                                                                |
| GO:0031093 | CELLULAR | 38   | 2  | 3.13E-01 | 1.000 | platelet alpha granule lumen                                                         |
| GO:0001944 | PROCESS  | 176  | 8  | 3.15E-01 | 1.000 | vasculature development                                                              |
| GO:0007126 | PROCESS  | 82   | 3  | 3.16E-01 | 1.000 | meiosis                                                                              |
| GO:0051327 | PROCESS  | 82   | 3  | 3.16E-01 | 1.000 | M phase of meiotic cell cycle                                                        |
| GO:0050954 | PROCESS  | 84   | 6  | 3.17E-01 | 1.000 | sensory perception of mechanical stimulus                                            |
| GO:0043542 | PROCESS  | 16   | 2  | 3.17E-01 | 1.000 | endothelial cell migration                                                           |
| GO:0030799 | PROCESS  | 91   | 5  | 3.17E-01 | 1.000 | regulation of cyclic nucleotide metabolic process                                    |
| GO:0051321 | PROCESS  | 84   | 3  | 3.19E-01 | 1.000 | meiotic cell cycle                                                                   |
| GO:0006950 | PROCESS  | 1334 | 36 | 3.20E-01 | 1.000 | response to stress                                                                   |
| GO:0016881 | FUNCTION | 176  | 6  | 3.20E-01 | 1.000 | acid-amino acid ligase activity                                                      |
| GO:0004540 | FUNCTION | 62   | 2  | 3.20E-01 | 1.000 | ribonuclease activity                                                                |
| GO:0005624 | CELLULAR | 613  | 24 | 3.21E-01 | 1.000 | membrane fraction                                                                    |
| GO:0050790 | PROCESS  | 712  | 22 | 3.21E-01 | 1.000 | regulation of catalytic activity                                                     |
| GO:0000302 | PROCESS  | 42   | 2  | 3.22E-01 | 1.000 | response to reactive oxygen species                                                  |
| GO:0015085 | FUNCTION | 12   | 2  | 3.22E-01 | 1.000 | calcium ion transmembrane transporter activity                                       |
| GO:0051329 | PROCESS  | 81   | 3  | 3.22E-01 | 1.000 | interphase of mitotic cell cycle                                                     |
| GO:0060191 | PROCESS  | 70   | 3  | 3.23E-01 | 1.000 | regulation of lipase activity                                                        |
| GO:0016209 | FUNCTION | 44   | 2  | 3.24E-01 | 1.000 | antioxidant activity                                                                 |
| GO:0030666 | CELLULAR | 31   | 2  | 3.25E-01 | 1.000 | endocytic vesicle membrane                                                           |
| GO:0035023 | PROCESS  | 88   | 6  | 3.25E-01 | 1.000 | regulation of Rho protein signal transduction                                        |
| GO:0019941 | PROCESS  | 517  | 13 | 3.26E-01 | 1.000 | modification-dependent protein catabolic process                                     |
| GO:0043632 | PROCESS  | 517  | 13 | 3.26E-01 | 1.000 | modification-dependent macromolecule catabolic process                               |
| GO:0006352 | PROCESS  | 73   | 2  | 3.27E-01 | 1.000 | transcription initiation                                                             |
| GO:0006140 | PROCESS  | 94   | 5  | 3.29E-01 | 1.000 | regulation of nucleotide metabolic process                                           |
| GO:0000082 | PROCESS  | 46   | 2  | 3.29E-01 | 1.000 | G1/S transition of mitotic cell cycle                                                |
| GO:0050670 | PROCESS  | 52   | 2  | 3.30E-01 | 1.000 | regulation of lymphocyte proliferation                                               |
| GO:0005581 | CELLULAR | 33   | 3  | 3.31E-01 | 1.000 | collagen                                                                             |
| GO:0006631 | PROCESS  | 179  | 6  | 3.32E-01 | 1.000 | fatty acid metabolic process                                                         |
| GO:0030863 | CELLULAR | 37   | 2  | 3.33E-01 | 1.000 | cortical cytoskeleton                                                                |
| GO:0006281 | PROCESS  | 257  | 7  | 3.36E-01 | 1.000 | DNA repair                                                                           |
| GO:0051270 | PROCESS  | 175  | 8  | 3.37E-01 | 1.000 | regulation of cell motion                                                            |
| GO:0043170 | PROCESS  | 3776 | 97 | 3.38E-01 | 1.000 | macromolecule metabolic process                                                      |
| GO:0032268 | PROCESS  | 408  | 12 | 3.38E-01 | 1.000 | regulation of cellular protein metabolic process                                     |
| GO:0008104 | PROCESS  | 773  | 23 | 3.38E-01 | 1.000 | protein localization                                                                 |
| GO:0046328 | PROCESS  | 53   | 2  | 3.38E-01 | 1.000 | regulation of JNK cascade                                                            |
| GO:0043283 | PROCESS  | 3670 | 95 | 3.39E-01 | 1.000 | biopolymer metabolic process                                                         |
| GO:0000267 | CELLULAR | 796  | 29 | 3.39E-01 | 1.000 | cell fraction                                                                        |
| GO:0016810 | FUNCTION | 107  | 4  | 3.39E-01 | 1.000 | hydrolase activity, acting on carbon-nitrogen (but not peptide) bonds                |
| GO:0042060 | PROCESS  | 131  | 5  | 3.40E-01 | 1.000 | wound healing                                                                        |
| GO:0032944 | PROCESS  | 53   | 2  | 3.41E-01 | 1.000 | regulation of mononuclear cell proliferation                                         |
| GO:0070663 | PROCESS  | 53   | 2  | 3.41E-01 | 1.000 | regulation of leukocyte proliferation                                                |
| GO:0060205 | CELLULAR | 40   | 2  | 3.42E-01 | 1.000 | cytoplasmic membrane-bounded vesicle lumen                                           |
| GO:0031983 | CELLULAR | 40   | 2  | 3.42E-01 | 1.000 | vesicle lumen                                                                        |
| GO:0030166 | PROCESS  | 22   | 2  | 3.43E-01 | 1.000 | proteoglycan biosynthetic process                                                    |
| GO:0051235 | PROCESS  | 53   | 2  | 3.44E-01 | 1.000 | maintenance of location                                                              |
| GO:0060255 | PROCESS  | 2929 | 72 | 3.44E-01 | 1.000 | regulation of macromolecule metabolic process                                        |
| GO:0032561 | FUNCTION | 343  | 10 | 3.44E-01 | 1.000 | guanyl ribonucleotide binding                                                        |
| GO:0019001 | FUNCTION | 343  | 10 | 3.44E-01 | 1.000 | guanyl nucleotide binding                                                            |
| GO:0033554 | PROCESS  | 442  | 12 | 3.44E-01 | 1.000 | cellular response to stress                                                          |
| GO:0009411 | PROCESS  | 49   | 2  | 3.45E-01 | 1.000 | response to UV                                                                       |

|            |          |      |     |          |       |                                                                                         |
|------------|----------|------|-----|----------|-------|-----------------------------------------------------------------------------------------|
| GO:0051325 | PROCESS  | 84   | 3   | 3.45E-01 | 1.000 | interphase                                                                              |
| GO:0045121 | CELLULAR | 82   | 5   | 3.45E-01 | 1.000 | membrane raft                                                                           |
| GO:0034984 | PROCESS  | 299  | 8   | 3.46E-01 | 1.000 | cellular response to DNA damage stimulus                                                |
| GO:0030551 | FUNCTION | 20   | 2   | 3.46E-01 | 1.000 | cyclic nucleotide binding                                                               |
| GO:0001508 | PROCESS  | 49   | 3   | 3.48E-01 | 1.000 | regulation of action potential                                                          |
| GO:0034470 | PROCESS  | 175  | 4   | 3.49E-01 | 1.000 | ncRNA processing                                                                        |
| GO:0004867 | FUNCTION | 88   | 3   | 3.49E-01 | 1.000 | serine-type endopeptidase inhibitor activity                                            |
| GO:0000793 | CELLULAR | 102  | 3   | 3.49E-01 | 1.000 | condensed chromosome                                                                    |
| GO:0031072 | FUNCTION | 63   | 2   | 3.51E-01 | 1.000 | heat shock protein binding                                                              |
| GO:0042391 | PROCESS  | 89   | 5   | 3.52E-01 | 1.000 | regulation of membrane potential                                                        |
| GO:0019226 | PROCESS  | 276  | 15  | 3.52E-01 | 1.000 | transmission of nerve impulse                                                           |
| GO:0032940 | PROCESS  | 147  | 7   | 3.53E-01 | 1.000 | secretion by cell                                                                       |
| GO:0048872 | PROCESS  | 61   | 2   | 3.53E-01 | 1.000 | homeostasis of number of cells                                                          |
| GO:0014070 | PROCESS  | 29   | 2   | 3.53E-01 | 1.000 | response to organic cyclic substance                                                    |
| GO:0070302 | PROCESS  | 54   | 2   | 3.53E-01 | 1.000 | regulation of stress-activated protein kinase signaling pathway                         |
| GO:0051046 | PROCESS  | 133  | 5   | 3.57E-01 | 1.000 | regulation of secretion                                                                 |
| GO:0060341 | PROCESS  | 174  | 6   | 3.59E-01 | 1.000 | regulation of cellular localization                                                     |
| GO:0005525 | FUNCTION | 334  | 9   | 3.59E-01 | 1.000 | GTP binding                                                                             |
| GO:0051899 | PROCESS  | 19   | 2   | 3.59E-01 | 1.000 | membrane depolarization                                                                 |
| GO:0008376 | FUNCTION | 31   | 3   | 3.60E-01 | 1.000 | acetylgalactosaminyltransferase activity                                                |
| GO:0016776 | FUNCTION | 29   | 2   | 3.65E-01 | 1.000 | phosphotransferase activity, phosphate group as acceptor                                |
| GO:0008201 | FUNCTION | 88   | 4   | 3.65E-01 | 1.000 | heparin binding                                                                         |
| GO:0031253 | CELLULAR | 40   | 2   | 3.65E-01 | 1.000 | cell projection membrane                                                                |
| GO:0002521 | PROCESS  | 88   | 4   | 3.65E-01 | 1.000 | leukocyte differentiation                                                               |
| GO:0030324 | PROCESS  | 67   | 3   | 3.65E-01 | 1.000 | lung development                                                                        |
| GO:0044238 | PROCESS  | 4857 | 124 | 3.65E-01 | 1.000 | primary metabolic process                                                               |
| GO:0030054 | CELLULAR | 461  | 26  | 3.65E-01 | 1.000 | cell junction                                                                           |
| GO:0005834 | CELLULAR | 26   | 2   | 3.66E-01 | 1.000 | heterotrimeric G-protein complex                                                        |
| GO:0007596 | PROCESS  | 82   | 3   | 3.67E-01 | 1.000 | blood coagulation                                                                       |
| GO:0050817 | PROCESS  | 82   | 3   | 3.67E-01 | 1.000 | coagulation                                                                             |
| GO:0048660 | PROCESS  | 25   | 2   | 3.68E-01 | 1.000 | regulation of smooth muscle cell proliferation                                          |
| GO:0016835 | FUNCTION | 50   | 2   | 3.71E-01 | 1.000 | carbon-oxygen lyase activity                                                            |
| GO:0007189 | PROCESS  | 33   | 2   | 3.71E-01 | 1.000 | activation of adenylate cyclase activity by G-protein signaling pathway                 |
| GO:0010579 | PROCESS  | 33   | 2   | 3.71E-01 | 1.000 | positive regulation of adenylate cyclase activity by G-protein signaling pathway        |
| GO:0010578 | PROCESS  | 33   | 2   | 3.71E-01 | 1.000 | regulation of adenylate cyclase activity involved in G-protein signaling                |
| GO:0034704 | CELLULAR | 26   | 3   | 3.72E-01 | 1.000 | calcium channel complex                                                                 |
| GO:0051592 | PROCESS  | 37   | 3   | 3.73E-01 | 1.000 | response to calcium ion                                                                 |
| GO:0005768 | CELLULAR | 260  | 8   | 3.76E-01 | 1.000 | endosome                                                                                |
| GO:0045165 | PROCESS  | 107  | 4   | 3.78E-01 | 1.000 | cell fate commitment                                                                    |
| GO:0044421 | CELLULAR | 842  | 29  | 3.78E-01 | 1.000 | extracellular region part                                                               |
| GO:0030832 | PROCESS  | 51   | 2   | 3.78E-01 | 1.000 | regulation of actin filament length                                                     |
| GO:0007188 | PROCESS  | 67   | 3   | 3.79E-01 | 1.000 | G-protein signaling, coupled to cAMP nucleotide second messenger                        |
| GO:0019992 | FUNCTION | 64   | 5   | 3.79E-01 | 1.000 | diacylglycerol binding                                                                  |
| GO:0007600 | PROCESS  | 703  | 18  | 3.82E-01 | 1.000 | sensory perception                                                                      |
| GO:0030695 | FUNCTION | 364  | 18  | 3.83E-01 | 1.000 | GTPase regulator activity                                                               |
| GO:0045637 | PROCESS  | 53   | 2   | 3.83E-01 | 1.000 | regulation of myeloid cell differentiation                                              |
| GO:0051223 | PROCESS  | 90   | 3   | 3.84E-01 | 1.000 | regulation of protein transport                                                         |
| GO:0010975 | PROCESS  | 42   | 3   | 3.86E-01 | 1.000 | regulation of neuron projection development                                             |
| GO:0050804 | PROCESS  | 65   | 4   | 3.87E-01 | 1.000 | regulation of synaptic transmission                                                     |
| GO:0016462 | FUNCTION | 684  | 23  | 3.87E-01 | 1.000 | pyrophosphatase activity                                                                |
| GO:0009605 | PROCESS  | 677  | 21  | 3.89E-01 | 1.000 | response to external stimulus                                                           |
| GO:0050727 | PROCESS  | 53   | 2   | 3.90E-01 | 1.000 | regulation of inflammatory response                                                     |
| GO:0030659 | CELLULAR | 112  | 5   | 3.91E-01 | 1.000 | cytoplasmic vesicle membrane                                                            |
| GO:0003677 | FUNCTION | 2132 | 48  | 3.91E-01 | 1.000 | DNA binding                                                                             |
| GO:0016811 | FUNCTION | 54   | 2   | 3.92E-01 | 1.000 | hydrolase activity, acting on carbon-nitrogen (but not peptide) bonds, in linear amides |
| GO:0016887 | FUNCTION | 299  | 12  | 3.93E-01 | 1.000 | ATPase activity                                                                         |
| GO:0051094 | PROCESS  | 504  | 17  | 3.94E-01 | 1.000 | positive regulation of developmental process                                            |
| GO:0080090 | PROCESS  | 2941 | 73  | 3.94E-01 | 1.000 | regulation of primary metabolic process                                                 |
| GO:0015837 | PROCESS  | 97   | 4   | 3.95E-01 | 1.000 | amine transport                                                                         |
| GO:0006355 | PROCESS  | 1570 | 38  | 3.95E-01 | 1.000 | regulation of transcription, DNA-dependent                                              |
| GO:0007254 | PROCESS  | 47   | 2   | 3.97E-01 | 1.000 | JNK cascade                                                                             |
| GO:0060589 | FUNCTION | 373  | 18  | 3.98E-01 | 1.000 | nucleoside-triphosphatase regulator activity                                            |
| GO:0016818 | FUNCTION | 687  | 23  | 3.99E-01 | 1.000 | hydrolase activity, acting on acid anhydrides, in phosphorus-containing anhydrides      |
| GO:0016798 | FUNCTION | 103  | 3   | 3.99E-01 | 1.000 | hydrolase activity, acting on glycosyl bonds                                            |
| GO:0007599 | PROCESS  | 86   | 3   | 3.99E-01 | 1.000 | hemostasis                                                                              |
| GO:0050921 | PROCESS  | 24   | 2   | 4.01E-01 | 1.000 | positive regulation of chemotaxis                                                       |
| GO:0040017 | PROCESS  | 24   | 2   | 4.01E-01 | 1.000 | positive regulation of locomotion                                                       |
| GO:0004012 | FUNCTION | 14   | 2   | 4.02E-01 | 1.000 | phospholipid-translocating ATPase activity                                              |
| GO:0015247 | FUNCTION | 14   | 2   | 4.02E-01 | 1.000 | aminophospholipid transporter activity                                                  |
| GO:0006397 | PROCESS  | 296  | 7   | 4.02E-01 | 1.000 | mRNA processing                                                                         |
| GO:0042157 | PROCESS  | 68   | 2   | 4.03E-01 | 1.000 | lipoprotein metabolic process                                                           |
| GO:0042127 | PROCESS  | 603  | 18  | 4.03E-01 | 1.000 | regulation of cell proliferation                                                        |
| GO:0003014 | PROCESS  | 19   | 2   | 4.03E-01 | 1.000 | renal system process                                                                    |
| GO:0005083 | FUNCTION | 235  | 12  | 4.04E-01 | 1.000 | small GTPase regulator activity                                                         |
| GO:0015630 | CELLULAR | 467  | 14  | 4.04E-01 | 1.000 | microtubule cytoskeleton                                                                |
| GO:0016817 | FUNCTION | 691  | 23  | 4.05E-01 | 1.000 | hydrolase activity, acting on acid anhydrides                                           |

|            |          |      |    |          |       |                                                                                                                                |
|------------|----------|------|----|----------|-------|--------------------------------------------------------------------------------------------------------------------------------|
| GO:0046982 | FUNCTION | 139  | 5  | 4.05E-01 | 1.000 | protein heterodimerization activity                                                                                            |
| GO:0043069 | PROCESS  | 277  | 8  | 4.05E-01 | 1.000 | negative regulation of programmed cell death                                                                                   |
| GO:0060548 | PROCESS  | 277  | 8  | 4.05E-01 | 1.000 | negative regulation of cell death                                                                                              |
| GO:0015698 | PROCESS  | 73   | 3  | 4.06E-01 | 1.000 | inorganic anion transport                                                                                                      |
| GO:0005739 | CELLULAR | 949  | 21 | 4.06E-01 | 1.000 | mitochondrion                                                                                                                  |
| GO:0044429 | CELLULAR | 517  | 11 | 4.07E-01 | 1.000 | mitochondrial part                                                                                                             |
| GO:0005044 | FUNCTION | 39   | 2  | 4.09E-01 | 1.000 | scavenger receptor activity                                                                                                    |
| GO:0005529 | FUNCTION | 172  | 6  | 4.09E-01 | 1.000 | sugar binding                                                                                                                  |
| GO:0010605 | PROCESS  | 589  | 17 | 4.11E-01 | 1.000 | negative regulation of macromolecule metabolic process                                                                         |
| GO:0042981 | PROCESS  | 607  | 18 | 4.12E-01 | 1.000 | regulation of apoptosis                                                                                                        |
| GO:0030323 | PROCESS  | 69   | 3  | 4.14E-01 | 1.000 | respiratory tube development                                                                                                   |
| GO:0070201 | PROCESS  | 96   | 3  | 4.14E-01 | 1.000 | regulation of establishment of protein localization                                                                            |
| GO:0009314 | PROCESS  | 146  | 5  | 4.15E-01 | 1.000 | response to radiation                                                                                                          |
| GO:0045017 | PROCESS  | 69   | 2  | 4.16E-01 | 1.000 | glycerolipid biosynthetic process                                                                                              |
| GO:0009790 | PROCESS  | 405  | 13 | 4.16E-01 | 1.000 | embryonic development                                                                                                          |
| GO:0007200 | PROCESS  | 43   | 2  | 4.17E-01 | 1.000 | activation of phospholipase C activity by G-protein coupled receptor protein signaling pathway coupled to IP3 second messenger |
| GO:0009205 | PROCESS  | 100  | 4  | 4.17E-01 | 1.000 | purine ribonucleoside triphosphate metabolic process                                                                           |
| GO:0048520 | PROCESS  | 27   | 2  | 4.17E-01 | 1.000 | positive regulation of behavior                                                                                                |
| GO:0010769 | PROCESS  | 49   | 3  | 4.18E-01 | 1.000 | regulation of cell morphogenesis involved in differentiation                                                                   |
| GO:0009199 | PROCESS  | 101  | 4  | 4.20E-01 | 1.000 | ribonucleoside triphosphate metabolic process                                                                                  |
| GO:0050920 | PROCESS  | 27   | 2  | 4.20E-01 | 1.000 | regulation of chemotaxis                                                                                                       |
| GO:0042221 | PROCESS  | 868  | 27 | 4.21E-01 | 1.000 | response to chemical stimulus                                                                                                  |
| GO:0004866 | FUNCTION | 134  | 4  | 4.21E-01 | 1.000 | endopeptidase inhibitor activity                                                                                               |
| GO:0006974 | PROCESS  | 329  | 8  | 4.21E-01 | 1.000 | response to DNA damage stimulus                                                                                                |
| GO:0046649 | PROCESS  | 135  | 5  | 4.21E-01 | 1.000 | lymphocyte activation                                                                                                          |
| GO:0008033 | PROCESS  | 72   | 2  | 4.21E-01 | 1.000 | tRNA processing                                                                                                                |
| GO:0009144 | PROCESS  | 101  | 4  | 4.21E-01 | 1.000 | purine nucleoside triphosphate metabolic process                                                                               |
| GO:0051969 | PROCESS  | 72   | 4  | 4.22E-01 | 1.000 | regulation of transmission of nerve impulse                                                                                    |
| GO:0060541 | PROCESS  | 73   | 3  | 4.22E-01 | 1.000 | respiratory system development                                                                                                 |
| GO:0031098 | PROCESS  | 50   | 2  | 4.23E-01 | 1.000 | stress-activated protein kinase signaling pathway                                                                              |
| GO:0016071 | PROCESS  | 339  | 8  | 4.25E-01 | 1.000 | mRNA metabolic process                                                                                                         |
| GO:0044430 | CELLULAR | 797  | 24 | 4.27E-01 | 1.000 | cytoskeletal part                                                                                                              |
| GO:0004252 | FUNCTION | 150  | 4  | 4.28E-01 | 1.000 | serine-type endopeptidase activity                                                                                             |
| GO:0055085 | PROCESS  | 204  | 6  | 4.28E-01 | 1.000 | transmembrane transport                                                                                                        |
| GO:0007050 | PROCESS  | 95   | 3  | 4.29E-01 | 1.000 | cell cycle arrest                                                                                                              |
| GO:0030099 | PROCESS  | 64   | 2  | 4.29E-01 | 1.000 | myeloid cell differentiation                                                                                                   |
| GO:0007166 | PROCESS  | 1577 | 46 | 4.30E-01 | 1.000 | cell surface receptor linked signal transduction                                                                               |
| GO:0043176 | FUNCTION | 80   | 3  | 4.30E-01 | 1.000 | amine binding                                                                                                                  |
| GO:0032269 | PROCESS  | 126  | 4  | 4.31E-01 | 1.000 | negative regulation of cellular protein metabolic process                                                                      |
| GO:0019932 | PROCESS  | 199  | 7  | 4.31E-01 | 1.000 | second-messenger-mediated signaling                                                                                            |
| GO:0031644 | PROCESS  | 75   | 4  | 4.33E-01 | 1.000 | regulation of neurological system process                                                                                      |
| GO:0051028 | PROCESS  | 75   | 2  | 4.33E-01 | 1.000 | mRNA transport                                                                                                                 |
| GO:0016568 | PROCESS  | 246  | 7  | 4.33E-01 | 1.000 | chromatin modification                                                                                                         |
| GO:0005743 | CELLULAR | 243  | 5  | 4.34E-01 | 1.000 | mitochondrial inner membrane                                                                                                   |
| GO:0007155 | PROCESS  | 647  | 34 | 4.35E-01 | 1.000 | cell adhesion                                                                                                                  |
| GO:0001936 | PROCESS  | 29   | 2  | 4.35E-01 | 1.000 | regulation of endothelial cell proliferation                                                                                   |
| GO:0022610 | PROCESS  | 648  | 34 | 4.36E-01 | 1.000 | biological adhesion                                                                                                            |
| GO:0009755 | PROCESS  | 48   | 2  | 4.39E-01 | 1.000 | hormone-mediated signaling                                                                                                     |
| GO:0012506 | CELLULAR | 120  | 5  | 4.39E-01 | 1.000 | vesicle membrane                                                                                                               |
| GO:0048754 | PROCESS  | 42   | 2  | 4.43E-01 | 1.000 | branching morphogenesis of a tube                                                                                              |
| GO:0006396 | PROCESS  | 509  | 11 | 4.43E-01 | 1.000 | RNA processing                                                                                                                 |
| GO:0022603 | PROCESS  | 231  | 9  | 4.46E-01 | 1.000 | regulation of anatomical structure morphogenesis                                                                               |
| GO:0005516 | FUNCTION | 130  | 7  | 4.47E-01 | 1.000 | calmodulin binding                                                                                                             |
| GO:0006865 | PROCESS  | 74   | 3  | 4.48E-01 | 1.000 | amino acid transport                                                                                                           |
| GO:0033559 | PROCESS  | 50   | 2  | 4.50E-01 | 1.000 | unsaturated fatty acid metabolic process                                                                                       |
| GO:0005795 | CELLULAR | 40   | 2  | 4.51E-01 | 1.000 | Golgi stack                                                                                                                    |
| GO:0046907 | PROCESS  | 548  | 15 | 4.51E-01 | 1.000 | intracellular transport                                                                                                        |
| GO:0004713 | FUNCTION | 147  | 7  | 4.52E-01 | 1.000 | protein tyrosine kinase activity                                                                                               |
| GO:0035239 | PROCESS  | 70   | 3  | 4.52E-01 | 1.000 | tube morphogenesis                                                                                                             |
| GO:0031344 | PROCESS  | 54   | 3  | 4.52E-01 | 1.000 | regulation of cell projection organization                                                                                     |
| GO:0010646 | PROCESS  | 801  | 28 | 4.53E-01 | 1.000 | regulation of cell communication                                                                                               |
| GO:0050795 | PROCESS  | 33   | 2  | 4.53E-01 | 1.000 | regulation of behavior                                                                                                         |
| GO:0016604 | CELLULAR | 150  | 4  | 4.53E-01 | 1.000 | nuclear body                                                                                                                   |
| GO:0009141 | PROCESS  | 107  | 4  | 4.54E-01 | 1.000 | nucleoside triphosphate metabolic process                                                                                      |
| GO:0050870 | PROCESS  | 57   | 2  | 4.55E-01 | 1.000 | positive regulation of T cell activation                                                                                       |
| GO:0019205 | FUNCTION | 39   | 2  | 4.56E-01 | 1.000 | nucleobase, nucleoside, nucleotide kinase activity                                                                             |
| GO:0030528 | FUNCTION | 1359 | 36 | 4.57E-01 | 1.000 | transcription regulator activity                                                                                               |
| GO:0042578 | FUNCTION | 313  | 13 | 4.58E-01 | 1.000 | phosphoric ester hydrolase activity                                                                                            |
| GO:0032787 | PROCESS  | 266  | 8  | 4.59E-01 | 1.000 | monocarboxylic acid metabolic process                                                                                          |
| GO:0006936 | PROCESS  | 123  | 6  | 4.60E-01 | 1.000 | muscle contraction                                                                                                             |
| GO:0046395 | PROCESS  | 98   | 3  | 4.60E-01 | 1.000 | carboxylic acid catabolic process                                                                                              |
| GO:0016054 | PROCESS  | 98   | 3  | 4.60E-01 | 1.000 | organic acid catabolic process                                                                                                 |
| GO:0045211 | CELLULAR | 119  | 9  | 4.60E-01 | 1.000 | postsynaptic membrane                                                                                                          |
| GO:0050900 | PROCESS  | 48   | 2  | 4.61E-01 | 1.000 | leukocyte migration                                                                                                            |
| GO:0022604 | PROCESS  | 97   | 5  | 4.61E-01 | 1.000 | regulation of cell morphogenesis                                                                                               |
| GO:0019933 | PROCESS  | 73   | 3  | 4.61E-01 | 1.000 | cAMP-mediated signaling                                                                                                        |
| GO:0043254 | PROCESS  | 62   | 2  | 4.62E-01 | 1.000 | regulation of protein complex assembly                                                                                         |
| GO:0015082 | FUNCTION | 31   | 2  | 4.62E-01 | 1.000 | di-, tri-valent inorganic cation transmembrane transporter activity                                                            |

|            |          |      |     |          |       |                                                             |
|------------|----------|------|-----|----------|-------|-------------------------------------------------------------|
| GO:0019222 | PROCESS  | 3218 | 79  | 4.64E-01 | 1.000 | regulation of metabolic process                             |
| GO:0030098 | PROCESS  | 69   | 3   | 4.64E-01 | 1.000 | lymphocyte differentiation                                  |
| GO:0030855 | PROCESS  | 57   | 2   | 4.66E-01 | 1.000 | epithelial cell differentiation                             |
| GO:0006650 | PROCESS  | 95   | 3   | 4.67E-01 | 1.000 | glycerophospholipid metabolic process                       |
| GO:0035295 | PROCESS  | 130  | 5   | 4.67E-01 | 1.000 | tube development                                            |
| GO:0007160 | PROCESS  | 79   | 4   | 4.68E-01 | 1.000 | cell-matrix adhesion                                        |
| GO:0048193 | PROCESS  | 110  | 3   | 4.69E-01 | 1.000 | Golgi vesicle transport                                     |
| GO:0035257 | FUNCTION | 69   | 2   | 4.70E-01 | 1.000 | nuclear hormone receptor binding                            |
| GO:0030817 | PROCESS  | 83   | 4   | 4.72E-01 | 1.000 | regulation of cAMP biosynthetic process                     |
| GO:0051247 | PROCESS  | 163  | 5   | 4.73E-01 | 1.000 | positive regulation of protein metabolic process            |
| GO:0031667 | PROCESS  | 102  | 3   | 4.76E-01 | 1.000 | response to nutrient levels                                 |
| GO:0048534 | PROCESS  | 183  | 6   | 4.77E-01 | 1.000 | hemopoietic or lymphoid organ development                   |
| GO:0032313 | PROCESS  | 43   | 2   | 4.79E-01 | 1.000 | regulation of Rab GTPase activity                           |
| GO:0032483 | PROCESS  | 43   | 2   | 4.79E-01 | 1.000 | regulation of Rab protein signal transduction               |
| GO:0004175 | FUNCTION | 354  | 10  | 4.79E-01 | 1.000 | endopeptidase activity                                      |
| GO:0045765 | PROCESS  | 83   | 3   | 4.79E-01 | 1.000 | regulation of angiogenesis                                  |
| GO:0003723 | FUNCTION | 655  | 15  | 4.80E-01 | 1.000 | RNA binding                                                 |
| GO:0006357 | PROCESS  | 592  | 16  | 4.81E-01 | 1.000 | regulation of transcription from RNA polymerase II promoter |
| GO:0005097 | FUNCTION | 44   | 2   | 4.81E-01 | 1.000 | Rab GTPase activator activity                               |
| GO:0009165 | PROCESS  | 165  | 6   | 4.82E-01 | 1.000 | nucleotide biosynthetic process                             |
| GO:0005262 | FUNCTION | 73   | 6   | 4.82E-01 | 1.000 | calcium channel activity                                    |
| GO:0017038 | PROCESS  | 108  | 3   | 4.82E-01 | 1.000 | protein import                                              |
| GO:0016879 | FUNCTION | 203  | 6   | 4.83E-01 | 1.000 | ligase activity, forming carbon-nitrogen bonds              |
| GO:0009150 | PROCESS  | 118  | 4   | 4.84E-01 | 1.000 | purine ribonucleotide metabolic process                     |
| GO:0006937 | PROCESS  | 54   | 3   | 4.84E-01 | 1.000 | regulation of muscle contraction                            |
| GO:0006511 | PROCESS  | 207  | 5   | 4.85E-01 | 1.000 | ubiquitin-dependent protein catabolic process               |
| GO:0003824 | FUNCTION | 4762 | 134 | 4.85E-01 | 1.000 | catalytic activity                                          |
| GO:0046930 | CELLULAR | 86   | 2   | 4.85E-01 | 1.000 | pore complex                                                |
| GO:0006576 | PROCESS  | 81   | 3   | 4.85E-01 | 1.000 | biogenic amine metabolic process                            |
| GO:0009791 | PROCESS  | 39   | 2   | 4.86E-01 | 1.000 | post-embryonic development                                  |
| GO:0014706 | PROCESS  | 95   | 4   | 4.87E-01 | 1.000 | striated muscle tissue development                          |
| GO:0001822 | PROCESS  | 64   | 3   | 4.88E-01 | 1.000 | kidney development                                          |
| GO:0051649 | PROCESS  | 697  | 20  | 4.89E-01 | 1.000 | establishment of localization in cell                       |
| GO:0006940 | PROCESS  | 27   | 2   | 4.89E-01 | 1.000 | regulation of smooth muscle contraction                     |
| GO:0006725 | PROCESS  | 107  | 4   | 4.92E-01 | 1.000 | cellular aromatic compound metabolic process                |
| GO:0019866 | CELLULAR | 259  | 5   | 4.92E-01 | 1.000 | organelle inner membrane                                    |
| GO:0000075 | PROCESS  | 74   | 2   | 4.93E-01 | 1.000 | cell cycle checkpoint                                       |
| GO:0050793 | PROCESS  | 1051 | 33  | 4.93E-01 | 1.000 | regulation of developmental process                         |
| GO:0032501 | PROCESS  | 3427 | 108 | 4.95E-01 | 1.000 | multicellular organismal process                            |
| GO:0004518 | FUNCTION | 147  | 3   | 4.95E-01 | 1.000 | nuclease activity                                           |
| GO:0007601 | PROCESS  | 205  | 8   | 4.95E-01 | 1.000 | visual perception                                           |
| GO:0050953 | PROCESS  | 205  | 8   | 4.95E-01 | 1.000 | sensory perception of light stimulus                        |
| GO:0030529 | CELLULAR | 442  | 7   | 4.96E-01 | 1.000 | ribonucleoprotein complex                                   |
| GO:0010468 | PROCESS  | 2575 | 60  | 4.97E-01 | 1.000 | regulation of gene expression                               |
| GO:0050890 | PROCESS  | 760  | 19  | 4.97E-01 | 1.000 | cognition                                                   |
| GO:0032880 | PROCESS  | 107  | 3   | 4.97E-01 | 1.000 | regulation of protein localization                          |
| GO:0009187 | PROCESS  | 31   | 2   | 4.98E-01 | 1.000 | cyclic nucleotide metabolic process                         |
| GO:0007049 | PROCESS  | 696  | 15  | 4.98E-01 | 1.000 | cell cycle                                                  |
| GO:0060249 | PROCESS  | 45   | 2   | 4.99E-01 | 1.000 | anatomical structure homeostasis                            |
| GO:0050880 | PROCESS  | 41   | 2   | 5.00E-01 | 1.000 | regulation of blood vessel size                             |
| GO:0035150 | PROCESS  | 41   | 2   | 5.00E-01 | 1.000 | regulation of tube size                                     |
| GO:0005891 | CELLULAR | 21   | 2   | 5.00E-01 | 1.000 | voltage-gated calcium channel complex                       |
| GO:0030814 | PROCESS  | 86   | 4   | 5.02E-01 | 1.000 | regulation of cAMP metabolic process                        |
| GO:0006606 | PROCESS  | 71   | 2   | 5.02E-01 | 1.000 | protein import into nucleus                                 |
| GO:0008509 | FUNCTION | 131  | 6   | 5.04E-01 | 1.000 | anion transmembrane transporter activity                    |
| GO:0007584 | PROCESS  | 66   | 2   | 5.05E-01 | 1.000 | response to nutrient                                        |
| GO:0005576 | CELLULAR | 1837 | 53  | 5.06E-01 | 1.000 | extracellular region                                        |
| GO:0007242 | PROCESS  | 1082 | 35  | 5.06E-01 | 1.000 | intracellular signalling cascade                            |
| GO:0051251 | PROCESS  | 68   | 2   | 5.07E-01 | 1.000 | positive regulation of lymphocyte activation                |
| GO:0009124 | PROCESS  | 45   | 2   | 5.08E-01 | 1.000 | nucleoside monophosphate biosynthetic process               |
| GO:0051170 | PROCESS  | 73   | 2   | 5.08E-01 | 1.000 | nuclear import                                              |
| GO:0046394 | PROCESS  | 139  | 4   | 5.10E-01 | 1.000 | carboxylic acid biosynthetic process                        |
| GO:0016053 | PROCESS  | 139  | 4   | 5.10E-01 | 1.000 | organic acid biosynthetic process                           |
| GO:0006259 | PROCESS  | 444  | 10  | 5.11E-01 | 1.000 | DNA metabolic process                                       |
| GO:0005925 | CELLULAR | 89   | 4   | 5.14E-01 | 1.000 | focal adhesion                                              |
| GO:0000904 | PROCESS  | 158  | 9   | 5.14E-01 | 1.000 | cell morphogenesis involved in differentiation              |
| GO:0060537 | PROCESS  | 100  | 4   | 5.15E-01 | 1.000 | muscle tissue development                                   |
| GO:0051427 | FUNCTION | 75   | 2   | 5.15E-01 | 1.000 | hormone receptor binding                                    |
| GO:0002520 | PROCESS  | 194  | 6   | 5.20E-01 | 1.000 | immune system development                                   |
| GO:0030336 | PROCESS  | 49   | 2   | 5.22E-01 | 1.000 | negative regulation of cell migration                       |
| GO:0045202 | CELLULAR | 266  | 17  | 5.23E-01 | 1.000 | synapse                                                     |
| GO:0031967 | CELLULAR | 520  | 11  | 5.23E-01 | 1.000 | organelle envelope                                          |
| GO:0008022 | FUNCTION | 114  | 4   | 5.23E-01 | 1.000 | protein C-terminus binding                                  |
| GO:0043066 | PROCESS  | 271  | 7   | 5.23E-01 | 1.000 | negative regulation of apoptosis                            |
| GO:0001763 | PROCESS  | 48   | 2   | 5.25E-01 | 1.000 | morphogenesis of a branching structure                      |
| GO:0031328 | PROCESS  | 536  | 16  | 5.25E-01 | 1.000 | positive regulation of cellular biosynthetic process        |
| GO:0005102 | FUNCTION | 771  | 22  | 5.26E-01 | 1.000 | receptor binding                                            |
| GO:0031975 | CELLULAR | 522  | 11  | 5.26E-01 | 1.000 | envelope                                                    |
| GO:0005788 | CELLULAR | 75   | 2   | 5.27E-01 | 1.000 | endoplasmic reticulum lumen                                 |

|            |          |      |     |          |       |                                                                                     |
|------------|----------|------|-----|----------|-------|-------------------------------------------------------------------------------------|
| GO:0032555 | FUNCTION | 1693 | 53  | 5.28E-01 | 1.000 | purine ribonucleotide binding                                                       |
| GO:0032553 | FUNCTION | 1693 | 53  | 5.28E-01 | 1.000 | ribonucleotide binding                                                              |
| GO:0019899 | FUNCTION | 405  | 14  | 5.29E-01 | 1.000 | enzyme binding                                                                      |
| GO:0004725 | FUNCTION | 92   | 5   | 5.29E-01 | 1.000 | protein tyrosine phosphatase activity                                               |
| GO:0030203 | PROCESS  | 47   | 2   | 5.29E-01 | 1.000 | glycosaminoglycan metabolic process                                                 |
| GO:0001655 | PROCESS  | 74   | 3   | 5.30E-01 | 1.000 | urogenital system development                                                       |
| GO:0006575 | PROCESS  | 138  | 4   | 5.31E-01 | 1.000 | cellular amino acid derivative metabolic process                                    |
| GO:0044444 | CELLULAR | 4282 | 107 | 5.33E-01 | 1.000 | cytoplasmic part                                                                    |
| GO:0031323 | PROCESS  | 3082 | 74  | 5.33E-01 | 1.000 | regulation of cellular metabolic process                                            |
| GO:0009891 | PROCESS  | 539  | 16  | 5.34E-01 | 1.000 | positive regulation of biosynthetic process                                         |
| GO:0007283 | PROCESS  | 229  | 5   | 5.34E-01 | 1.000 | spermatogenesis                                                                     |
| GO:0048232 | PROCESS  | 229  | 5   | 5.34E-01 | 1.000 | male gamete generation                                                              |
| GO:0003018 | PROCESS  | 44   | 2   | 5.37E-01 | 1.000 | vascular process in circulatory system                                              |
| GO:0007190 | PROCESS  | 47   | 2   | 5.38E-01 | 1.000 | activation of adenylate cyclase activity                                            |
| GO:0007202 | PROCESS  | 55   | 2   | 5.39E-01 | 1.000 | activation of phospholipase C activity                                              |
| GO:0010863 | PROCESS  | 55   | 2   | 5.39E-01 | 1.000 | positive regulation of phospholipase C activity                                     |
| GO:0051641 | PROCESS  | 764  | 22  | 5.40E-01 | 1.000 | cellular localization                                                               |
| GO:0016324 | CELLULAR | 81   | 4   | 5.40E-01 | 1.000 | apical plasma membrane                                                              |
| GO:0033365 | PROCESS  | 119  | 3   | 5.40E-01 | 1.000 | protein localization in organelle                                                   |
| GO:0010518 | PROCESS  | 56   | 2   | 5.42E-01 | 1.000 | positive regulation of phospholipase activity                                       |
| GO:0045762 | PROCESS  | 48   | 2   | 5.45E-01 | 1.000 | positive regulation of adenylate cyclase activity                                   |
| GO:0048167 | PROCESS  | 29   | 2   | 5.45E-01 | 1.000 | regulation of synaptic plasticity                                                   |
| GO:0007264 | PROCESS  | 248  | 7   | 5.45E-01 | 1.000 | small GTPase mediated signal transduction                                           |
| GO:0045595 | PROCESS  | 352  | 12  | 5.46E-01 | 1.000 | regulation of cell differentiation                                                  |
| GO:0031589 | PROCESS  | 89   | 4   | 5.47E-01 | 1.000 | cell-substrate adhesion                                                             |
| GO:0032559 | FUNCTION | 1380 | 46  | 5.48E-01 | 1.000 | adenyl ribonucleotide binding                                                       |
| GO:0050839 | FUNCTION | 21   | 3   | 5.48E-01 | 1.000 | cell adhesion molecule binding                                                      |
| GO:0016477 | PROCESS  | 196  | 8   | 5.48E-01 | 1.000 | cell migration                                                                      |
| GO:0051186 | PROCESS  | 169  | 4   | 5.49E-01 | 1.000 | cofactor metabolic process                                                          |
| GO:0031281 | PROCESS  | 49   | 2   | 5.50E-01 | 1.000 | positive regulation of cyclase activity                                             |
| GO:0051093 | PROCESS  | 445  | 13  | 5.50E-01 | 1.000 | negative regulation of developmental process                                        |
| GO:0008380 | PROCESS  | 258  | 5   | 5.50E-01 | 1.000 | RNA splicing                                                                        |
| GO:0004553 | FUNCTION | 81   | 2   | 5.51E-01 | 1.000 | hydrolase activity, hydrolyzing O-glycosyl compounds                                |
| GO:0010517 | PROCESS  | 58   | 2   | 5.51E-01 | 1.000 | regulation of phospholipase activity                                                |
| GO:0007010 | PROCESS  | 355  | 12  | 5.52E-01 | 1.000 | cytoskeleton organization                                                           |
| GO:0032386 | PROCESS  | 60   | 2   | 5.52E-01 | 1.000 | regulation of intracellular transport                                               |
| GO:0046483 | PROCESS  | 280  | 9   | 5.53E-01 | 1.000 | heterocycle metabolic process                                                       |
| GO:0019219 | PROCESS  | 2514 | 59  | 5.53E-01 | 1.000 | regulation of nucleobase, nucleoside, nucleotide and nucleic acid metabolic process |
| GO:0006310 | PROCESS  | 88   | 2   | 5.56E-01 | 1.000 | DNA recombination                                                                   |
| GO:0004222 | FUNCTION | 98   | 4   | 5.57E-01 | 1.000 | metalloendopeptidase activity                                                       |
| GO:0005912 | CELLULAR | 130  | 7   | 5.58E-01 | 1.000 | adherens junction                                                                   |
| GO:0016829 | FUNCTION | 139  | 4   | 5.58E-01 | 1.000 | lyase activity                                                                      |
| GO:0034504 | PROCESS  | 79   | 2   | 5.59E-01 | 1.000 | protein localization in nucleus                                                     |
| GO:0015294 | FUNCTION | 74   | 3   | 5.61E-01 | 1.000 | solute:cation symporter activity                                                    |
| GO:0051349 | PROCESS  | 51   | 2   | 5.61E-01 | 1.000 | positive regulation of lyase activity                                               |
| GO:0005178 | FUNCTION | 51   | 2   | 5.61E-01 | 1.000 | integrin binding                                                                    |
| GO:0006886 | PROCESS  | 323  | 8   | 5.61E-01 | 1.000 | intracellular protein transport                                                     |
| GO:0009206 | PROCESS  | 87   | 3   | 5.61E-01 | 1.000 | purine ribonucleoside triphosphate biosynthetic process                             |
| GO:0009145 | PROCESS  | 87   | 3   | 5.61E-01 | 1.000 | purine nucleoside triphosphate biosynthetic process                                 |
| GO:0048598 | PROCESS  | 220  | 6   | 5.61E-01 | 1.000 | embryonic morphogenesis                                                             |
| GO:0005924 | CELLULAR | 93   | 4   | 5.63E-01 | 1.000 | cell-substrate adherens junction                                                    |
| GO:0009201 | PROCESS  | 88   | 3   | 5.64E-01 | 1.000 | ribonucleoside triphosphate biosynthetic process                                    |
| GO:0009142 | PROCESS  | 88   | 3   | 5.64E-01 | 1.000 | nucleoside triphosphate biosynthetic process                                        |
| GO:0046700 | PROCESS  | 56   | 2   | 5.65E-01 | 1.000 | heterocycle catabolic process                                                       |
| GO:0006820 | PROCESS  | 116  | 4   | 5.66E-01 | 1.000 | anion transport                                                                     |
| GO:0016791 | FUNCTION | 231  | 8   | 5.68E-01 | 1.000 | phosphatase activity                                                                |
| GO:0031324 | PROCESS  | 567  | 15  | 5.68E-01 | 1.000 | negative regulation of cellular metabolic process                                   |
| GO:0002696 | PROCESS  | 76   | 2   | 5.68E-01 | 1.000 | positive regulation of leukocyte activation                                         |
| GO:0051015 | FUNCTION | 38   | 2   | 5.70E-01 | 1.000 | actin filament binding                                                              |
| GO:0007565 | PROCESS  | 76   | 2   | 5.71E-01 | 1.000 | female pregnancy                                                                    |
| GO:0042623 | FUNCTION | 238  | 8   | 5.72E-01 | 1.000 | ATPase activity, coupled                                                            |
| GO:0051129 | PROCESS  | 114  | 3   | 5.72E-01 | 1.000 | negative regulation of cellular component organization                              |
| GO:0051239 | PROCESS  | 689  | 22  | 5.72E-01 | 1.000 | regulation of multicellular organismal process                                      |
| GO:0007215 | PROCESS  | 22   | 2   | 5.74E-01 | 1.000 | glutamate signaling pathway                                                         |
| GO:0005783 | CELLULAR | 867  | 23  | 5.74E-01 | 1.000 | endoplasmic reticulum                                                               |
| GO:0032956 | PROCESS  | 66   | 2   | 5.75E-01 | 1.000 | regulation of actin cytoskeleton organization                                       |
| GO:0051241 | PROCESS  | 100  | 3   | 5.75E-01 | 1.000 | negative regulation of multicellular organismal process                             |
| GO:0009991 | PROCESS  | 118  | 3   | 5.75E-01 | 1.000 | response to extracellular stimulus                                                  |
| GO:0048870 | PROCESS  | 223  | 9   | 5.76E-01 | 1.000 | cell motility                                                                       |
| GO:0045182 | FUNCTION | 106  | 2   | 5.79E-01 | 1.000 | translation regulator activity                                                      |
| GO:0030097 | PROCESS  | 163  | 5   | 5.79E-01 | 1.000 | hemopoiesis                                                                         |
| GO:0003012 | PROCESS  | 153  | 6   | 5.80E-01 | 1.000 | muscle system process                                                               |
| GO:0030326 | PROCESS  | 54   | 2   | 5.80E-01 | 1.000 | embryonic limb morphogenesis                                                        |
| GO:0035113 | PROCESS  | 54   | 2   | 5.80E-01 | 1.000 | embryonic appendage morphogenesis                                                   |
| GO:0051171 | PROCESS  | 2531 | 59  | 5.81E-01 | 1.000 | regulation of nitrogen compound metabolic process                                   |
| GO:0009893 | PROCESS  | 681  | 20  | 5.81E-01 | 1.000 | positive regulation of metabolic process                                            |
| GO:0006519 | PROCESS  | 316  | 8   | 5.82E-01 | 1.000 | cellular amino acid and derivative metabolic process                                |
| GO:0048646 | PROCESS  | 244  | 9   | 5.82E-01 | 1.000 | anatomical structure formation involved in morphogenesis                            |

|            |          |      |    |          |       |                                                                                              |
|------------|----------|------|----|----------|-------|----------------------------------------------------------------------------------------------|
| GO:0000166 | FUNCTION | 2046 | 61 | 5.83E-01 | 1.000 | nucleotide binding                                                                           |
| GO:0017076 | FUNCTION | 1768 | 54 | 5.85E-01 | 1.000 | purine nucleotide binding                                                                    |
| GO:0032970 | PROCESS  | 69   | 2  | 5.85E-01 | 1.000 | regulation of actin filament-based process                                                   |
| GO:0051051 | PROCESS  | 96   | 3  | 5.85E-01 | 1.000 | negative regulation of transport                                                             |
| GO:0005125 | FUNCTION | 191  | 3  | 5.85E-01 | 1.000 | cytokine activity                                                                            |
| GO:0019216 | PROCESS  | 86   | 3  | 5.86E-01 | 1.000 | regulation of lipid metabolic process                                                        |
| GO:0030055 | CELLULAR | 96   | 4  | 5.86E-01 | 1.000 | cell-substrate junction                                                                      |
| GO:0030136 | CELLULAR | 101  | 4  | 5.86E-01 | 1.000 | clathrin-coated vesicle                                                                      |
| GO:0009259 | PROCESS  | 127  | 4  | 5.87E-01 | 1.000 | ribonucleotide metabolic process                                                             |
| GO:0046777 | PROCESS  | 57   | 2  | 5.90E-01 | 1.000 | protein amino acid autophosphorylation                                                       |
| GO:0015631 | FUNCTION | 72   | 2  | 5.90E-01 | 1.000 | tubulin binding                                                                              |
| GO:0009966 | PROCESS  | 716  | 23 | 5.92E-01 | 1.000 | regulation of signal transduction                                                            |
| GO:0009581 | PROCESS  | 60   | 2  | 5.93E-01 | 1.000 | detection of external stimulus                                                               |
| GO:0006022 | PROCESS  | 57   | 2  | 5.94E-01 | 1.000 | aminoglycan metabolic process                                                                |
| GO:0051716 | PROCESS  | 604  | 15 | 5.95E-01 | 1.000 | cellular response to stimulus                                                                |
| GO:0045321 | PROCESS  | 168  | 5  | 5.96E-01 | 1.000 | leukocyte activation                                                                         |
| GO:0050867 | PROCESS  | 79   | 2  | 5.97E-01 | 1.000 | positive regulation of cell activation                                                       |
| GO:0004970 | FUNCTION | 17   | 2  | 5.98E-01 | 1.000 | ionotropic glutamate receptor activity                                                       |
| GO:0005234 | FUNCTION | 18   | 2  | 5.99E-01 | 1.000 | extracellular-glutamate-gated ion channel activity                                           |
| GO:0003676 | FUNCTION | 2957 | 62 | 6.01E-01 | 1.000 | nucleic acid binding                                                                         |
| GO:0045935 | PROCESS  | 484  | 14 | 6.01E-01 | 1.000 | positive regulation of nucleobase, nucleoside, nucleotide and nucleic acid metabolic process |
| GO:0031327 | PROCESS  | 459  | 12 | 6.01E-01 | 1.000 | negative regulation of cellular biosynthetic process                                         |
| GO:0010033 | PROCESS  | 417  | 12 | 6.01E-01 | 1.000 | response to organic substance                                                                |
| GO:0010038 | PROCESS  | 67   | 3  | 6.02E-01 | 1.000 | response to metal ion                                                                        |
| GO:0010647 | PROCESS  | 253  | 7  | 6.02E-01 | 1.000 | positive regulation of cell communication                                                    |
| GO:0042493 | PROCESS  | 84   | 3  | 6.03E-01 | 1.000 | response to drug                                                                             |
| GO:0030554 | FUNCTION | 1453 | 47 | 6.04E-01 | 1.000 | adenyl nucleotide binding                                                                    |
| GO:0006730 | PROCESS  | 89   | 2  | 6.05E-01 | 1.000 | one-carbon metabolic process                                                                 |
| GO:0030036 | PROCESS  | 188  | 7  | 6.05E-01 | 1.000 | actin cytoskeleton organization                                                              |
| GO:0042445 | PROCESS  | 87   | 3  | 6.06E-01 | 1.000 | hormone metabolic process                                                                    |
| GO:0040011 | PROCESS  | 333  | 11 | 6.07E-01 | 1.000 | locomotion                                                                                   |
| GO:0046034 | PROCESS  | 89   | 3  | 6.08E-01 | 1.000 | ATP metabolic process                                                                        |
| GO:0010629 | PROCESS  | 420  | 11 | 6.08E-01 | 1.000 | negative regulation of gene expression                                                       |
| GO:0010740 | PROCESS  | 145  | 3  | 6.10E-01 | 1.000 | positive regulation of protein kinase cascade                                                |
| GO:0045944 | PROCESS  | 273  | 8  | 6.11E-01 | 1.000 | positive regulation of transcription from RNA polymerase II promoter                         |
| GO:0032403 | FUNCTION | 126  | 4  | 6.12E-01 | 1.000 | protein complex binding                                                                      |
| GO:0007346 | PROCESS  | 138  | 3  | 6.12E-01 | 1.000 | regulation of mitotic cell cycle                                                             |
| GO:0008146 | FUNCTION | 45   | 2  | 6.12E-01 | 1.000 | sulfotransferase activity                                                                    |
| GO:0006325 | PROCESS  | 332  | 7  | 6.14E-01 | 1.000 | chromatin organization                                                                       |
| GO:0009890 | PROCESS  | 465  | 12 | 6.16E-01 | 1.000 | negative regulation of biosynthetic process                                                  |
| GO:0005089 | FUNCTION | 66   | 4  | 6.17E-01 | 1.000 | Rho guanyl-nucleotide exchange factor activity                                               |
| GO:0045893 | PROCESS  | 378  | 11 | 6.20E-01 | 1.000 | positive regulation of transcription, DNA-dependent                                          |
| GO:0031981 | CELLULAR | 1297 | 26 | 6.21E-01 | 1.000 | nuclear lumen                                                                                |
| GO:0010035 | PROCESS  | 72   | 3  | 6.22E-01 | 1.000 | response to inorganic substance                                                              |
| GO:0031326 | PROCESS  | 2641 | 61 | 6.24E-01 | 1.000 | regulation of cellular biosynthetic process                                                  |
| GO:0050863 | PROCESS  | 84   | 2  | 6.25E-01 | 1.000 | regulation of T cell activation                                                              |
| GO:0050770 | PROCESS  | 36   | 2  | 6.26E-01 | 1.000 | regulation of axonogenesis                                                                   |
| GO:0051254 | PROCESS  | 381  | 11 | 6.28E-01 | 1.000 | positive regulation of RNA metabolic process                                                 |
| GO:0001883 | FUNCTION | 1469 | 47 | 6.28E-01 | 1.000 | purine nucleoside binding                                                                    |
| GO:0006928 | PROCESS  | 361  | 15 | 6.29E-01 | 1.000 | cell motion                                                                                  |
| GO:0051674 | PROCESS  | 361  | 15 | 6.29E-01 | 1.000 | localization of cell                                                                         |
| GO:0010627 | PROCESS  | 225  | 5  | 6.29E-01 | 1.000 | regulation of protein kinase cascade                                                         |
| GO:0005245 | FUNCTION | 24   | 2  | 6.30E-01 | 1.000 | voltage-gated calcium channel activity                                                       |
| GO:0048705 | PROCESS  | 74   | 2  | 6.30E-01 | 1.000 | skeletal system morphogenesis                                                                |
| GO:0051173 | PROCESS  | 495  | 14 | 6.31E-01 | 1.000 | positive regulation of nitrogen compound metabolic process                                   |
| GO:0008654 | PROCESS  | 91   | 2  | 6.31E-01 | 1.000 | phospholipid biosynthetic process                                                            |
| GO:0043168 | FUNCTION | 78   | 3  | 6.32E-01 | 1.000 | anion binding                                                                                |
| GO:0005524 | FUNCTION | 1366 | 44 | 6.34E-01 | 1.000 | ATP binding                                                                                  |
| GO:0008360 | PROCESS  | 48   | 2  | 6.34E-01 | 1.000 | regulation of cell shape                                                                     |
| GO:0009889 | PROCESS  | 2649 | 61 | 6.34E-01 | 1.000 | regulation of biosynthetic process                                                           |
| GO:0051098 | PROCESS  | 118  | 3  | 6.35E-01 | 1.000 | regulation of binding                                                                        |
| GO:0032147 | PROCESS  | 83   | 3  | 6.35E-01 | 1.000 | activation of protein kinase activity                                                        |
| GO:0007411 | PROCESS  | 71   | 5  | 6.36E-01 | 1.000 | axon guidance                                                                                |
| GO:0006470 | PROCESS  | 118  | 5  | 6.36E-01 | 1.000 | protein amino acid dephosphorylation                                                         |
| GO:0032270 | PROCESS  | 158  | 4  | 6.37E-01 | 1.000 | positive regulation of cellular protein metabolic process                                    |
| GO:0007219 | PROCESS  | 43   | 2  | 6.39E-01 | 1.000 | Notch signaling pathway                                                                      |
| GO:0050865 | PROCESS  | 125  | 3  | 6.40E-01 | 1.000 | regulation of cell activation                                                                |
| GO:0016782 | FUNCTION | 54   | 2  | 6.40E-01 | 1.000 | transferase activity, transferring sulfur-containing groups                                  |
| GO:0031252 | CELLULAR | 108  | 4  | 6.41E-01 | 1.000 | cell leading edge                                                                            |
| GO:0000226 | PROCESS  | 108  | 2  | 6.41E-01 | 1.000 | microtubule cytoskeleton organization                                                        |
| GO:0043687 | PROCESS  | 1043 | 33 | 6.41E-01 | 1.000 | post-translational protein modification                                                      |
| GO:0051188 | PROCESS  | 88   | 2  | 6.41E-01 | 1.000 | cofactor biosynthetic process                                                                |
| GO:0051052 | PROCESS  | 101  | 2  | 6.41E-01 | 1.000 | regulation of DNA metabolic process                                                          |
| GO:0016607 | CELLULAR | 95   | 2  | 6.42E-01 | 1.000 | nuclear speck                                                                                |
| GO:0015171 | FUNCTION | 52   | 2  | 6.42E-01 | 1.000 | amino acid transmembrane transporter activity                                                |
| GO:0009967 | PROCESS  | 241  | 6  | 6.43E-01 | 1.000 | positive regulation of signal transduction                                                   |
| GO:0007423 | PROCESS  | 159  | 5  | 6.45E-01 | 1.000 | sensory organ development                                                                    |
| GO:0051271 | PROCESS  | 54   | 2  | 6.46E-01 | 1.000 | negative regulation of cell motion                                                           |

|            |          |      |    |          |       |                                                                                       |
|------------|----------|------|----|----------|-------|---------------------------------------------------------------------------------------|
| GO:0045449 | PROCESS  | 2339 | 52 | 6.47E-01 | 1.000 | regulation of transcription                                                           |
| GO:0001882 | FUNCTION | 1478 | 47 | 6.47E-01 | 1.000 | nucleoside binding                                                                    |
| GO:0009416 | PROCESS  | 108  | 3  | 6.47E-01 | 1.000 | response to light stimulus                                                            |
| GO:0005911 | CELLULAR | 156  | 6  | 6.47E-01 | 1.000 | cell-cell junction                                                                    |
| GO:0031325 | PROCESS  | 658  | 18 | 6.49E-01 | 1.000 | positive regulation of cellular metabolic process                                     |
| GO:0009308 | PROCESS  | 351  | 9  | 6.52E-01 | 1.000 | amine metabolic process                                                               |
| GO:0006399 | PROCESS  | 114  | 2  | 6.52E-01 | 1.000 | tRNA metabolic process                                                                |
| GO:0005509 | FUNCTION | 865  | 38 | 6.53E-01 | 1.000 | calcium ion binding                                                                   |
| GO:0055067 | PROCESS  | 32   | 2  | 6.53E-01 | 1.000 | monovalent inorganic cation homeostasis                                               |
| GO:0048015 | PROCESS  | 75   | 2  | 6.57E-01 | 1.000 | phosphoinositide-mediated signaling                                                   |
| GO:0009152 | PROCESS  | 105  | 3  | 6.58E-01 | 1.000 | purine ribonucleotide biosynthetic process                                            |
| GO:0015662 | FUNCTION | 44   | 2  | 6.59E-01 | 1.000 | ATPase activity, coupled to transmembrane movement of ions, phosphorylative mechanism |
| GO:0043009 | PROCESS  | 229  | 6  | 6.59E-01 | 1.000 | chordate embryonic development                                                        |
| GO:0046906 | FUNCTION | 119  | 3  | 6.61E-01 | 1.000 | tetrapyrrole binding                                                                  |
| GO:0030135 | CELLULAR | 126  | 4  | 6.62E-01 | 1.000 | coated vesicle                                                                        |
| GO:0006633 | PROCESS  | 74   | 2  | 6.62E-01 | 1.000 | fatty acid biosynthetic process                                                       |
| GO:0030029 | PROCESS  | 204  | 7  | 6.63E-01 | 1.000 | actin filament-based process                                                          |
| GO:0016616 | FUNCTION | 96   | 2  | 6.64E-01 | 1.000 | oxidoreductase activity, acting on the CH-OH group of donors, NAD or NADP as acceptor |
| GO:0031974 | CELLULAR | 1668 | 33 | 6.64E-01 | 1.000 | membrane-enclosed lumen                                                               |
| GO:0030016 | CELLULAR | 91   | 3  | 6.65E-01 | 1.000 | myofibril                                                                             |
| GO:0019752 | PROCESS  | 497  | 12 | 6.65E-01 | 1.000 | carboxylic acid metabolic process                                                     |
| GO:0043436 | PROCESS  | 497  | 12 | 6.65E-01 | 1.000 | oxoacid metabolic process                                                             |
| GO:0009792 | PROCESS  | 231  | 6  | 6.66E-01 | 1.000 | embryonic development ending in birth or egg hatching                                 |
| GO:0008544 | PROCESS  | 153  | 3  | 6.66E-01 | 1.000 | epidermis development                                                                 |
| GO:0043005 | CELLULAR | 171  | 9  | 6.67E-01 | 1.000 | neuron projection                                                                     |
| GO:0051253 | PROCESS  | 288  | 7  | 6.68E-01 | 1.000 | negative regulation of RNA metabolic process                                          |
| GO:0006082 | PROCESS  | 500  | 12 | 6.69E-01 | 1.000 | organic acid metabolic process                                                        |
| GO:0048469 | PROCESS  | 53   | 2  | 6.69E-01 | 1.000 | cell maturation                                                                       |
| GO:0048609 | PROCESS  | 68   | 2  | 6.70E-01 | 1.000 | reproductive process in a multicellular organism                                      |
| GO:0032504 | PROCESS  | 68   | 2  | 6.70E-01 | 1.000 | multicellular organism reproduction                                                   |
| GO:0006665 | PROCESS  | 67   | 2  | 6.72E-01 | 1.000 | sphingolipid metabolic process                                                        |
| GO:0009628 | PROCESS  | 242  | 7  | 6.72E-01 | 1.000 | response to abiotic stimulus                                                          |
| GO:0034613 | PROCESS  | 355  | 8  | 6.73E-01 | 1.000 | cellular protein localization                                                         |
| GO:0051259 | PROCESS  | 106  | 3  | 6.73E-01 | 1.000 | protein oligomerization                                                               |
| GO:0005625 | CELLULAR | 199  | 5  | 6.75E-01 | 1.000 | soluble fraction                                                                      |
| GO:0010604 | PROCESS  | 646  | 18 | 6.75E-01 | 1.000 | positive regulation of macromolecule metabolic process                                |
| GO:0009101 | PROCESS  | 144  | 5  | 6.77E-01 | 1.000 | glycoprotein biosynthetic process                                                     |
| GO:0031090 | CELLULAR | 931  | 23 | 6.78E-01 | 1.000 | organelle membrane                                                                    |
| GO:0005856 | CELLULAR | 1187 | 37 | 6.79E-01 | 1.000 | cytoskeleton                                                                          |
| GO:0043408 | PROCESS  | 83   | 2  | 6.80E-01 | 1.000 | regulation of MAPKKK cascade                                                          |
| GO:0070161 | CELLULAR | 149  | 7  | 6.83E-01 | 1.000 | anchoring junction                                                                    |
| GO:0042180 | PROCESS  | 507  | 12 | 6.86E-01 | 1.000 | cellular ketone metabolic process                                                     |
| GO:0022613 | PROCESS  | 164  | 2  | 6.86E-01 | 1.000 | ribonucleoprotein complex biogenesis                                                  |
| GO:0005794 | CELLULAR | 774  | 24 | 6.88E-01 | 1.000 | Golgi apparatus                                                                       |
| GO:0070727 | PROCESS  | 358  | 8  | 6.91E-01 | 1.000 | cellular macromolecule localization                                                   |
| GO:0043292 | CELLULAR | 99   | 3  | 6.92E-01 | 1.000 | contractile fiber                                                                     |
| GO:0009968 | PROCESS  | 195  | 5  | 6.94E-01 | 1.000 | negative regulation of signal transduction                                            |
| GO:0005829 | CELLULAR | 1075 | 25 | 6.95E-01 | 1.000 | cytosol                                                                               |
| GO:0051249 | PROCESS  | 102  | 2  | 6.95E-01 | 1.000 | regulation of lymphocyte activation                                                   |
| GO:0009617 | PROCESS  | 127  | 2  | 6.95E-01 | 1.000 | response to bacterium                                                                 |
| GO:0031347 | PROCESS  | 94   | 2  | 6.96E-01 | 1.000 | regulation of defense response                                                        |
| GO:0035108 | PROCESS  | 63   | 2  | 6.99E-01 | 1.000 | limb morphogenesis                                                                    |
| GO:0035107 | PROCESS  | 63   | 2  | 6.99E-01 | 1.000 | appendage morphogenesis                                                               |
| GO:0043233 | CELLULAR | 1637 | 32 | 7.01E-01 | 1.000 | organelle lumen                                                                       |
| GO:0050878 | PROCESS  | 109  | 3  | 7.01E-01 | 1.000 | regulation of body fluid levels                                                       |
| GO:0043269 | PROCESS  | 67   | 2  | 7.03E-01 | 1.000 | regulation of ion transport                                                           |
| GO:0016311 | PROCESS  | 133  | 5  | 7.03E-01 | 1.000 | dephosphorylation                                                                     |
| GO:0007169 | PROCESS  | 186  | 7  | 7.04E-01 | 1.000 | transmembrane receptor protein tyrosine kinase signaling pathway                      |
| GO:0048812 | PROCESS  | 131  | 7  | 7.04E-01 | 1.000 | neuron projection morphogenesis                                                       |
| GO:0001775 | PROCESS  | 201  | 5  | 7.05E-01 | 1.000 | cell activation                                                                       |
| GO:0009123 | PROCESS  | 55   | 2  | 7.06E-01 | 1.000 | nucleoside monophosphate metabolic process                                            |
| GO:0007178 | PROCESS  | 83   | 2  | 7.06E-01 | 1.000 | transmembrane receptor protein serine/threonine kinase signaling pathway              |
| GO:0005099 | FUNCTION | 80   | 3  | 7.06E-01 | 1.000 | Ras GTPase activator activity                                                         |
| GO:0006643 | PROCESS  | 73   | 2  | 7.07E-01 | 1.000 | membrane lipid metabolic process                                                      |
| GO:0022414 | PROCESS  | 547  | 12 | 7.07E-01 | 1.000 | reproductive process                                                                  |
| GO:0050662 | FUNCTION | 154  | 4  | 7.08E-01 | 1.000 | coenzyme binding                                                                      |
| GO:0051726 | PROCESS  | 270  | 5  | 7.09E-01 | 1.000 | regulation of cell cycle                                                              |
| GO:0010817 | PROCESS  | 111  | 3  | 7.10E-01 | 1.000 | regulation of hormone levels                                                          |
| GO:0000003 | PROCESS  | 551  | 12 | 7.10E-01 | 1.000 | reproduction                                                                          |
| GO:0016614 | FUNCTION | 108  | 2  | 7.13E-01 | 1.000 | oxidoreductase activity, acting on CH-OH group of donors                              |
| GO:0005923 | CELLULAR | 65   | 2  | 7.14E-01 | 1.000 | tight junction                                                                        |
| GO:0070160 | CELLULAR | 65   | 2  | 7.14E-01 | 1.000 | occluding junction                                                                    |
| GO:0009100 | PROCESS  | 181  | 6  | 7.15E-01 | 1.000 | glycoprotein metabolic process                                                        |
| GO:0060173 | PROCESS  | 65   | 2  | 7.15E-01 | 1.000 | limb development                                                                      |
| GO:0048736 | PROCESS  | 65   | 2  | 7.15E-01 | 1.000 | appendage development                                                                 |
| GO:0007398 | PROCESS  | 167  | 3  | 7.15E-01 | 1.000 | ectoderm development                                                                  |



|            |          |      |     |          |       |                                                                                              |
|------------|----------|------|-----|----------|-------|----------------------------------------------------------------------------------------------|
| GO:0004930 | FUNCTION | 743  | 14  | 7.15E-01 | 1.000 | G-protein coupled receptor activity                                                          |
| GO:0005088 | FUNCTION | 78   | 4   | 7.16E-01 | 1.000 | Ras guanyl-nucleotide exchange factor activity                                               |
| GO:0048667 | PROCESS  | 133  | 7   | 7.17E-01 | 1.000 | cell morphogenesis involved in neuron differentiation                                        |
| GO:0005200 | FUNCTION | 71   | 2   | 7.18E-01 | 1.000 | structural constituent of cytoskeleton                                                       |
| GO:0042625 | FUNCTION | 61   | 2   | 7.20E-01 | 1.000 | ATPase activity, coupled to transmembrane movement of ions                                   |
| GO:0050658 | PROCESS  | 84   | 2   | 7.20E-01 | 1.000 | RNA transport                                                                                |
| GO:0050657 | PROCESS  | 84   | 2   | 7.20E-01 | 1.000 | nucleic acid transport                                                                       |
| GO:0051236 | PROCESS  | 84   | 2   | 7.20E-01 | 1.000 | establishment of RNA localization                                                            |
| GO:0051276 | PROCESS  | 423  | 8   | 7.21E-01 | 1.000 | chromosome organization                                                                      |
| GO:0034660 | PROCESS  | 217  | 3   | 7.21E-01 | 1.000 | ncRNA metabolic process                                                                      |
| GO:0045597 | PROCESS  | 169  | 5   | 7.21E-01 | 1.000 | positive regulation of cell differentiation                                                  |
| GO:0044432 | CELLULAR | 302  | 7   | 7.21E-01 | 1.000 | endoplasmic reticulum part                                                                   |
| GO:0003924 | FUNCTION | 181  | 3   | 7.22E-01 | 1.000 | GTPase activity                                                                              |
| GO:0019199 | FUNCTION | 80   | 4   | 7.23E-01 | 1.000 | transmembrane receptor protein kinase activity                                               |
| GO:0014069 | CELLULAR | 43   | 3   | 7.23E-01 | 1.000 | postsynaptic density                                                                         |
| GO:0004672 | FUNCTION | 559  | 19  | 7.26E-01 | 1.000 | protein kinase activity                                                                      |
| GO:0010648 | PROCESS  | 204  | 5   | 7.27E-01 | 1.000 | negative regulation of cell communication                                                    |
| GO:0009117 | PROCESS  | 247  | 7   | 7.27E-01 | 1.000 | nucleotide metabolic process                                                                 |
| GO:0006753 | PROCESS  | 247  | 7   | 7.27E-01 | 1.000 | nucleoside phosphate metabolic process                                                       |
| GO:0048858 | PROCESS  | 138  | 7   | 7.29E-01 | 1.000 | cell projection morphogenesis                                                                |
| GO:0042110 | PROCESS  | 80   | 2   | 7.30E-01 | 1.000 | T cell activation                                                                            |
| GO:0044267 | PROCESS  | 2072 | 51  | 7.32E-01 | 1.000 | cellular protein metabolic process                                                           |
| GO:0016874 | FUNCTION | 355  | 8   | 7.32E-01 | 1.000 | ligase activity                                                                              |
| GO:0019887 | FUNCTION | 73   | 2   | 7.36E-01 | 1.000 | protein kinase regulator activity                                                            |
| GO:0006457 | PROCESS  | 153  | 2   | 7.36E-01 | 1.000 | protein folding                                                                              |
| GO:0045934 | PROCESS  | 420  | 10  | 7.38E-01 | 1.000 | negative regulation of nucleobase, nucleoside, nucleotide and nucleic acid metabolic process |
| GO:0007608 | PROCESS  | 363  | 4   | 7.38E-01 | 1.000 | sensory perception of smell                                                                  |
| GO:0048523 | PROCESS  | 1309 | 33  | 7.38E-01 | 1.000 | negative regulation of cellular process                                                      |
| GO:0004721 | FUNCTION | 150  | 5   | 7.40E-01 | 1.000 | phosphoprotein phosphatase activity                                                          |
| GO:0051172 | PROCESS  | 421  | 10  | 7.41E-01 | 1.000 | negative regulation of nitrogen compound metabolic process                                   |
| GO:0009260 | PROCESS  | 112  | 3   | 7.41E-01 | 1.000 | ribonucleotide biosynthetic process                                                          |
| GO:0016070 | PROCESS  | 830  | 15  | 7.42E-01 | 1.000 | RNA metabolic process                                                                        |
| GO:0031225 | CELLULAR | 208  | 8   | 7.42E-01 | 1.000 | anchored to membrane                                                                         |
| GO:0021700 | PROCESS  | 66   | 2   | 7.43E-01 | 1.000 | developmental maturation                                                                     |
| GO:0004497 | FUNCTION | 88   | 2   | 7.44E-01 | 1.000 | monooxygenase activity                                                                       |
| GO:0046942 | PROCESS  | 115  | 3   | 7.45E-01 | 1.000 | carboxylic acid transport                                                                    |
| GO:0032990 | PROCESS  | 145  | 7   | 7.45E-01 | 1.000 | cell part morphogenesis                                                                      |
| GO:0010608 | PROCESS  | 184  | 3   | 7.45E-01 | 1.000 | posttranscriptional regulation of gene expression                                            |
| GO:0015849 | PROCESS  | 116  | 3   | 7.45E-01 | 1.000 | organic acid transport                                                                       |
| GO:0045596 | PROCESS  | 157  | 4   | 7.46E-01 | 1.000 | negative regulation of cell differentiation                                                  |
| GO:0007267 | PROCESS  | 497  | 16  | 7.46E-01 | 1.000 | cell-cell signaling                                                                          |
| GO:0048513 | PROCESS  | 1319 | 40  | 7.48E-01 | 1.000 | organ development                                                                            |
| GO:0051493 | PROCESS  | 101  | 2   | 7.51E-01 | 1.000 | regulation of cytoskeleton organization                                                      |
| GO:0005901 | CELLULAR | 30   | 2   | 7.51E-01 | 1.000 | caveola                                                                                      |
| GO:0006403 | PROCESS  | 86   | 2   | 7.52E-01 | 1.000 | RNA localization                                                                             |
| GO:0030674 | FUNCTION | 84   | 2   | 7.54E-01 | 1.000 | protein binding, bridging                                                                    |
| GO:0044249 | PROCESS  | 1587 | 36  | 7.54E-01 | 1.000 | cellular biosynthetic process                                                                |
| GO:0040008 | PROCESS  | 244  | 5   | 7.55E-01 | 1.000 | regulation of growth                                                                         |
| GO:0007167 | PROCESS  | 282  | 10  | 7.55E-01 | 1.000 | enzyme linked receptor protein signaling pathway                                             |
| GO:0090066 | PROCESS  | 222  | 5   | 7.55E-01 | 1.000 | regulation of anatomical structure size                                                      |
| GO:0044451 | CELLULAR | 470  | 9   | 7.56E-01 | 1.000 | nucleoplasm part                                                                             |
| GO:0006351 | PROCESS  | 226  | 4   | 7.57E-01 | 1.000 | transcription, DNA-dependent                                                                 |
| GO:0045664 | PROCESS  | 85   | 3   | 7.57E-01 | 1.000 | regulation of neuron differentiation                                                         |
| GO:0010556 | PROCESS  | 2541 | 54  | 7.58E-01 | 1.000 | regulation of macromolecule biosynthetic process                                             |
| GO:0005730 | CELLULAR | 628  | 11  | 7.59E-01 | 1.000 | nucleolus                                                                                    |
| GO:0016740 | FUNCTION | 1568 | 44  | 7.62E-01 | 1.000 | transferase activity                                                                         |
| GO:0009887 | PROCESS  | 521  | 15  | 7.63E-01 | 1.000 | organ morphogenesis                                                                          |
| GO:0070013 | CELLULAR | 1601 | 30  | 7.66E-01 | 1.000 | intracellular organelle lumen                                                                |
| GO:0016564 | FUNCTION | 261  | 6   | 7.66E-01 | 1.000 | transcription repressor activity                                                             |
| GO:0016337 | PROCESS  | 256  | 11  | 7.67E-01 | 1.000 | cell-cell adhesion                                                                           |
| GO:0010628 | PROCESS  | 455  | 12  | 7.67E-01 | 1.000 | positive regulation of gene expression                                                       |
| GO:0005085 | FUNCTION | 140  | 6   | 7.68E-01 | 1.000 | guanyl-nucleotide exchange factor activity                                                   |
| GO:0032774 | PROCESS  | 230  | 4   | 7.70E-01 | 1.000 | RNA biosynthetic process                                                                     |
| GO:0000902 | PROCESS  | 218  | 9   | 7.71E-01 | 1.000 | cell morphogenesis                                                                           |
| GO:0044270 | PROCESS  | 85   | 2   | 7.72E-01 | 1.000 | nitrogen compound catabolic process                                                          |
| GO:0005001 | FUNCTION | 18   | 2   | 7.72E-01 | 1.000 | transmembrane receptor protein tyrosine phosphatase activity                                 |
| GO:0019198 | FUNCTION | 18   | 2   | 7.72E-01 | 1.000 | transmembrane receptor protein phosphatase activity                                          |
| GO:0044087 | PROCESS  | 108  | 2   | 7.73E-01 | 1.000 | regulation of cellular component biogenesis                                                  |
| GO:0030031 | PROCESS  | 60   | 2   | 7.73E-01 | 1.000 | cell projection assembly                                                                     |
| GO:0044237 | PROCESS  | 4589 | 106 | 7.73E-01 | 1.000 | cellular metabolic process                                                                   |
| GO:0006754 | PROCESS  | 78   | 2   | 7.74E-01 | 1.000 | ATP biosynthetic process                                                                     |
| GO:0008283 | PROCESS  | 302  | 7   | 7.74E-01 | 1.000 | cell proliferation                                                                           |
| GO:0045941 | PROCESS  | 440  | 11  | 7.75E-01 | 1.000 | positive regulation of transcription                                                         |
| GO:0055086 | PROCESS  | 267  | 7   | 7.75E-01 | 1.000 | nucleobase, nucleoside and nucleotide metabolic process                                      |
| GO:0006412 | PROCESS  | 273  | 3   | 7.76E-01 | 1.000 | translation                                                                                  |
| GO:0019207 | FUNCTION | 83   | 2   | 7.77E-01 | 1.000 | kinase regulator activity                                                                    |
| GO:0005813 | CELLULAR | 191  | 4   | 7.77E-01 | 1.000 | centrosome                                                                                   |
| GO:0003712 | FUNCTION | 325  | 7   | 7.77E-01 | 1.000 | transcription cofactor activity                                                              |

|            |          |      |    |          |       |                                                                       |
|------------|----------|------|----|----------|-------|-----------------------------------------------------------------------|
| GO:0004674 | FUNCTION | 395  | 12 | 7.80E-01 | 1.000 | protein serine/threonine kinase activity                              |
| GO:0032870 | PROCESS  | 96   | 2  | 7.80E-01 | 1.000 | cellular response to hormone stimulus                                 |
| GO:0043062 | PROCESS  | 104  | 3  | 7.81E-01 | 1.000 | extracellular structure organization                                  |
| GO:0007409 | PROCESS  | 123  | 6  | 7.81E-01 | 1.000 | axonogenesis                                                          |
| GO:0044456 | CELLULAR | 182  | 10 | 7.82E-01 | 1.000 | synapse part                                                          |
| GO:0033043 | PROCESS  | 179  | 3  | 7.84E-01 | 1.000 | regulation of organelle organization                                  |
| GO:0005789 | CELLULAR | 228  | 5  | 7.86E-01 | 1.000 | endoplasmic reticulum membrane                                        |
| GO:0051707 | PROCESS  | 219  | 3  | 7.89E-01 | 1.000 | response to other organism                                            |
| GO:0008083 | FUNCTION | 151  | 3  | 7.90E-01 | 1.000 | growth factor activity                                                |
| GO:0045892 | PROCESS  | 283  | 6  | 7.91E-01 | 1.000 | negative regulation of transcription, DNA-dependent                   |
| GO:0008037 | PROCESS  | 47   | 3  | 7.91E-01 | 1.000 | cell recognition                                                      |
| GO:0044446 | CELLULAR | 3686 | 79 | 7.95E-01 | 1.000 | intracellular organelle part                                          |
| GO:0016323 | CELLULAR | 150  | 5  | 7.95E-01 | 1.000 | basolateral plasma membrane                                           |
| GO:0031404 | FUNCTION | 66   | 2  | 7.96E-01 | 1.000 | chloride ion binding                                                  |
| GO:0005654 | CELLULAR | 781  | 14 | 7.98E-01 | 1.000 | nucleoplasm                                                           |
| GO:0006366 | PROCESS  | 176  | 3  | 8.01E-01 | 1.000 | transcription from RNA polymerase II promoter                         |
| GO:0045296 | FUNCTION | 13   | 2  | 8.02E-01 | 1.000 | cadherin binding                                                      |
| GO:0030027 | CELLULAR | 57   | 2  | 8.02E-01 | 1.000 | lamellipodium                                                         |
| GO:0006520 | PROCESS  | 213  | 4  | 8.02E-01 | 1.000 | cellular amino acid metabolic process                                 |
| GO:0044106 | PROCESS  | 213  | 4  | 8.02E-01 | 1.000 | cellular amine metabolic process                                      |
| GO:0001817 | PROCESS  | 130  | 2  | 8.03E-01 | 1.000 | regulation of cytokine production                                     |
| GO:0044428 | CELLULAR | 1605 | 30 | 8.04E-01 | 1.000 | nuclear part                                                          |
| GO:0007606 | PROCESS  | 405  | 4  | 8.06E-01 | 1.000 | sensory perception of chemical stimulus                               |
| GO:0009058 | PROCESS  | 1657 | 37 | 8.07E-01 | 1.000 | biosynthetic process                                                  |
| GO:0015931 | PROCESS  | 99   | 2  | 8.07E-01 | 1.000 | nucleobase, nucleoside, nucleotide and nucleic acid transport         |
| GO:0030534 | PROCESS  | 59   | 2  | 8.09E-01 | 1.000 | adult behavior                                                        |
| GO:0042995 | CELLULAR | 464  | 18 | 8.11E-01 | 1.000 | cell projection                                                       |
| GO:0012505 | CELLULAR | 680  | 18 | 8.12E-01 | 1.000 | endomembrane system                                                   |
| GO:0003777 | FUNCTION | 72   | 2  | 8.12E-01 | 1.000 | microtubule motor activity                                            |
| GO:0005254 | FUNCTION | 63   | 2  | 8.13E-01 | 1.000 | chloride channel activity                                             |
| GO:0030900 | PROCESS  | 88   | 2  | 8.14E-01 | 1.000 | forebrain development                                                 |
| GO:0005976 | PROCESS  | 97   | 2  | 8.14E-01 | 1.000 | polysaccharide metabolic process                                      |
| GO:0020037 | FUNCTION | 111  | 2  | 8.14E-01 | 1.000 | heme binding                                                          |
| GO:0005634 | CELLULAR | 4571 | 94 | 8.15E-01 | 1.000 | nucleus                                                               |
| GO:0005253 | FUNCTION | 67   | 2  | 8.21E-01 | 1.000 | anion channel activity                                                |
| GO:0007276 | PROCESS  | 286  | 5  | 8.21E-01 | 1.000 | gamete generation                                                     |
| GO:0048519 | PROCESS  | 1431 | 36 | 8.23E-01 | 1.000 | negative regulation of biological process                             |
| GO:0007017 | PROCESS  | 207  | 4  | 8.23E-01 | 1.000 | microtubule-based process                                             |
| GO:0051050 | PROCESS  | 159  | 3  | 8.24E-01 | 1.000 | positive regulation of transport                                      |
| GO:0006486 | PROCESS  | 119  | 3  | 8.24E-01 | 1.000 | protein amino acid glycosylation                                      |
| GO:0043413 | PROCESS  | 119  | 3  | 8.24E-01 | 1.000 | biopolymer glycosylation                                              |
| GO:0070085 | PROCESS  | 119  | 3  | 8.24E-01 | 1.000 | glycosylation                                                         |
| GO:0006913 | PROCESS  | 132  | 2  | 8.24E-01 | 1.000 | nucleocytoplasmic transport                                           |
| GO:0005694 | CELLULAR | 386  | 5  | 8.25E-01 | 1.000 | chromosome                                                            |
| GO:0051240 | PROCESS  | 147  | 3  | 8.26E-01 | 1.000 | positive regulation of multicellular organismal process               |
| GO:0051169 | PROCESS  | 134  | 2  | 8.28E-01 | 1.000 | nuclear transport                                                     |
| GO:0043405 | PROCESS  | 115  | 2  | 8.29E-01 | 1.000 | regulation of MAP kinase activity                                     |
| GO:0032989 | PROCESS  | 246  | 9  | 8.29E-01 | 1.000 | cellular component morphogenesis                                      |
| GO:0010557 | PROCESS  | 513  | 12 | 8.29E-01 | 1.000 | positive regulation of macromolecule biosynthetic process             |
| GO:0055114 | PROCESS  | 570  | 12 | 8.30E-01 | 1.000 | oxidation reduction                                                   |
| GO:0002694 | PROCESS  | 119  | 2  | 8.30E-01 | 1.000 | regulation of leukocyte activation                                    |
| GO:0016301 | FUNCTION | 717  | 22 | 8.31E-01 | 1.000 | kinase activity                                                       |
| GO:0050767 | PROCESS  | 110  | 3  | 8.31E-01 | 1.000 | regulation of neurogenesis                                            |
| GO:0006807 | PROCESS  | 1885 | 39 | 8.33E-01 | 1.000 | nitrogen compound metabolic process                                   |
| GO:0006732 | PROCESS  | 132  | 2  | 8.35E-01 | 1.000 | coenzyme metabolic process                                            |
| GO:0042175 | CELLULAR | 241  | 5  | 8.35E-01 | 1.000 | nuclear envelope-endoplasmic reticulum network                        |
| GO:0044422 | CELLULAR | 3708 | 79 | 8.37E-01 | 1.000 | organelle part                                                        |
| GO:0003714 | FUNCTION | 124  | 2  | 8.37E-01 | 1.000 | transcription corepressor activity                                    |
| GO:0044260 | PROCESS  | 3304 | 73 | 8.38E-01 | 1.000 | cellular macromolecule metabolic process                              |
| GO:0044449 | CELLULAR | 91   | 2  | 8.38E-01 | 1.000 | contractile fiber part                                                |
| GO:0005201 | FUNCTION | 76   | 2  | 8.40E-01 | 1.000 | extracellular matrix structural constituent                           |
| GO:0009607 | PROCESS  | 304  | 4  | 8.41E-01 | 1.000 | response to biotic stimulus                                           |
| GO:0044092 | PROCESS  | 277  | 5  | 8.42E-01 | 1.000 | negative regulation of molecular function                             |
| GO:0016481 | PROCESS  | 378  | 8  | 8.42E-01 | 1.000 | negative regulation of transcription                                  |
| GO:0005815 | CELLULAR | 213  | 4  | 8.43E-01 | 1.000 | microtubule organizing center                                         |
| GO:0000139 | CELLULAR | 172  | 4  | 8.43E-01 | 1.000 | Golgi membrane                                                        |
| GO:0030030 | PROCESS  | 239  | 10 | 8.44E-01 | 1.000 | cell projection organization                                          |
| GO:0031175 | PROCESS  | 155  | 7  | 8.47E-01 | 1.000 | neuron projection development                                         |
| GO:0005874 | CELLULAR | 240  | 5  | 8.48E-01 | 1.000 | microtubule                                                           |
| GO:0006605 | PROCESS  | 180  | 3  | 8.49E-01 | 1.000 | protein targeting                                                     |
| GO:0070887 | PROCESS  | 197  | 4  | 8.49E-01 | 1.000 | cellular response to chemical stimulus                                |
| GO:0006139 | PROCESS  | 1548 | 30 | 8.51E-01 | 1.000 | nucleobase, nucleoside, nucleotide and nucleic acid metabolic process |
| GO:0032535 | PROCESS  | 184  | 3  | 8.51E-01 | 1.000 | regulation of cellular component size                                 |
| GO:0001666 | PROCESS  | 72   | 2  | 8.52E-01 | 1.000 | response to hypoxia                                                   |
| GO:0006464 | PROCESS  | 1290 | 36 | 8.52E-01 | 1.000 | protein modification process                                          |
| GO:0043086 | PROCESS  | 233  | 4  | 8.52E-01 | 1.000 | negative regulation of catalytic activity                             |
| GO:0006350 | PROCESS  | 268  | 4  | 8.53E-01 | 1.000 | transcription                                                         |
| GO:0043412 | PROCESS  | 1356 | 37 | 8.53E-01 | 1.000 | biopolymer modification                                               |
| GO:0045761 | PROCESS  | 79   | 2  | 8.53E-01 | 1.000 | regulation of adenylate cyclase activity                              |

|            |          |      |    |          |       |                                                                                                |
|------------|----------|------|----|----------|-------|------------------------------------------------------------------------------------------------|
| GO:0034641 | PROCESS  | 224  | 4  | 8.53E-01 | 1.000 | cellular nitrogen compound metabolic process                                                   |
| GO:0000122 | PROCESS  | 205  | 4  | 8.54E-01 | 1.000 | negative regulation of transcription from RNA polymerase II promoter                           |
| GO:0060429 | PROCESS  | 117  | 2  | 8.54E-01 | 1.000 | epithelium development                                                                         |
| GO:0045860 | PROCESS  | 172  | 4  | 8.54E-01 | 1.000 | positive regulation of protein kinase activity                                                 |
| GO:0016773 | FUNCTION | 667  | 20 | 8.54E-01 | 1.000 | phosphotransferase activity, alcohol group as acceptor                                         |
| GO:0001501 | PROCESS  | 243  | 5  | 8.55E-01 | 1.000 | skeletal system development                                                                    |
| GO:0034960 | PROCESS  | 3187 | 70 | 8.55E-01 | 1.000 | cellular biopolymer metabolic process                                                          |
| GO:0070482 | PROCESS  | 74   | 2  | 8.55E-01 | 1.000 | response to oxygen levels                                                                      |
| GO:0033674 | PROCESS  | 173  | 4  | 8.56E-01 | 1.000 | positive regulation of kinase activity                                                         |
| GO:0046943 | FUNCTION | 80   | 2  | 8.58E-01 | 1.000 | carboxylic acid transmembrane transporter activity                                             |
| GO:0005342 | FUNCTION | 81   | 2  | 8.59E-01 | 1.000 | organic acid transmembrane transporter activity                                                |
| GO:0007610 | PROCESS  | 349  | 9  | 8.59E-01 | 1.000 | behavior                                                                                       |
| GO:0031279 | PROCESS  | 81   | 2  | 8.60E-01 | 1.000 | regulation of cyclase activity                                                                 |
| GO:0005578 | CELLULAR | 290  | 10 | 8.61E-01 | 1.000 | proteinaceous extracellular matrix                                                             |
| GO:0048666 | PROCESS  | 211  | 8  | 8.61E-01 | 1.000 | neuron development                                                                             |
| GO:0051339 | PROCESS  | 83   | 2  | 8.64E-01 | 1.000 | regulation of lyase activity                                                                   |
| GO:0010558 | PROCESS  | 450  | 9  | 8.64E-01 | 1.000 | negative regulation of macromolecule biosynthetic process                                      |
| GO:0051960 | PROCESS  | 125  | 3  | 8.66E-01 | 1.000 | regulation of nervous system development                                                       |
| GO:0017124 | FUNCTION | 83   | 2  | 8.71E-01 | 1.000 | SH3 domain binding                                                                             |
| GO:0007018 | PROCESS  | 98   | 2  | 8.71E-01 | 1.000 | microtubule-based movement                                                                     |
| GO:0008066 | FUNCTION | 29   | 2  | 8.71E-01 | 1.000 | glutamate receptor activity                                                                    |
| GO:0042626 | FUNCTION | 93   | 3  | 8.74E-01 | 1.000 | ATPase activity, coupled to transmembrane movement of substances                               |
| GO:0051347 | PROCESS  | 180  | 4  | 8.75E-01 | 1.000 | positive regulation of transferase activity                                                    |
| GO:0044420 | CELLULAR | 97   | 3  | 8.77E-01 | 1.000 | extracellular matrix part                                                                      |
| GO:0043492 | FUNCTION | 94   | 3  | 8.77E-01 | 1.000 | ATPase activity, coupled to movement of substances                                             |
| GO:0044271 | PROCESS  | 132  | 2  | 8.78E-01 | 1.000 | nitrogen compound biosynthetic process                                                         |
| GO:0016820 | FUNCTION | 95   | 3  | 8.78E-01 | 1.000 | hydrolase activity, acting on acid anhydrides, catalyzing transmembrane movement of substances |
| GO:0048037 | FUNCTION | 214  | 4  | 8.80E-01 | 1.000 | cofactor binding                                                                               |
| GO:0048468 | PROCESS  | 587  | 18 | 8.81E-01 | 1.000 | cell development                                                                               |
| GO:0018193 | PROCESS  | 122  | 2  | 8.82E-01 | 1.000 | peptidyl-amino acid modification                                                               |
| GO:0016772 | FUNCTION | 833  | 23 | 8.85E-01 | 1.000 | transferase activity, transferring phosphorus-containing groups                                |
| GO:0043296 | CELLULAR | 89   | 2  | 8.85E-01 | 1.000 | apical junction complex                                                                        |
| GO:0015405 | FUNCTION | 104  | 3  | 8.85E-01 | 1.000 | P-P-bond-hydrolysis-driven transmembrane transporter activity                                  |
| GO:0015399 | FUNCTION | 104  | 3  | 8.85E-01 | 1.000 | primary active transmembrane transporter activity                                              |
| GO:0004984 | FUNCTION | 346  | 2  | 8.86E-01 | 1.000 | olfactory receptor activity                                                                    |
| GO:0003713 | FUNCTION | 196  | 3  | 8.89E-01 | 1.000 | transcription coactivator activity                                                             |
| GO:0005496 | FUNCTION | 112  | 2  | 8.90E-01 | 1.000 | steroid binding                                                                                |
| GO:0007275 | PROCESS  | 2322 | 69 | 8.92E-01 | 1.000 | multicellular organismal development                                                           |
| GO:0031012 | CELLULAR | 308  | 10 | 8.94E-01 | 1.000 | extracellular matrix                                                                           |
| GO:0048699 | PROCESS  | 367  | 12 | 8.96E-01 | 1.000 | generation of neurons                                                                          |
| GO:0009653 | PROCESS  | 843  | 24 | 8.98E-01 | 1.000 | anatomical structure morphogenesis                                                             |
| GO:0043284 | PROCESS  | 741  | 11 | 9.01E-01 | 1.000 | biopolymer biosynthetic process                                                                |
| GO:0019953 | PROCESS  | 343  | 5  | 9.03E-01 | 1.000 | sexual reproduction                                                                            |
| GO:0016327 | CELLULAR | 92   | 2  | 9.05E-01 | 1.000 | apicolateral plasma membrane                                                                   |
| GO:0009059 | PROCESS  | 930  | 16 | 9.05E-01 | 1.000 | macromolecule biosynthetic process                                                             |
| GO:0008285 | PROCESS  | 288  | 6  | 9.07E-01 | 1.000 | negative regulation of cell proliferation                                                      |
| GO:0060284 | PROCESS  | 138  | 3  | 9.08E-01 | 1.000 | regulation of cell development                                                                 |
| GO:0044427 | CELLULAR | 314  | 3  | 9.08E-01 | 1.000 | chromosomal part                                                                               |
| GO:0001558 | PROCESS  | 134  | 2  | 9.10E-01 | 1.000 | regulation of cell growth                                                                      |
| GO:0016563 | FUNCTION | 341  | 6  | 9.10E-01 | 1.000 | transcription activator activity                                                               |
| GO:0009719 | PROCESS  | 200  | 4  | 9.10E-01 | 1.000 | response to endogenous stimulus                                                                |
| GO:0009725 | PROCESS  | 186  | 3  | 9.10E-01 | 1.000 | response to hormone stimulus                                                                   |
| GO:0045859 | PROCESS  | 278  | 5  | 9.12E-01 | 1.000 | regulation of protein kinase activity                                                          |
| GO:0043232 | CELLULAR | 2236 | 50 | 9.13E-01 | 1.000 | intracellular non-membrane-bounded organelle                                                   |
| GO:0043228 | CELLULAR | 2236 | 50 | 9.13E-01 | 1.000 | non-membrane-bounded organelle                                                                 |
| GO:0000165 | PROCESS  | 142  | 2  | 9.13E-01 | 1.000 | MAPKKK cascade                                                                                 |
| GO:0043549 | PROCESS  | 283  | 5  | 9.14E-01 | 1.000 | regulation of kinase activity                                                                  |
| GO:0019900 | FUNCTION | 124  | 2  | 9.15E-01 | 1.000 | kinase binding                                                                                 |
| GO:0016491 | FUNCTION | 624  | 12 | 9.15E-01 | 1.000 | oxidoreductase activity                                                                        |
| GO:0007507 | PROCESS  | 158  | 3  | 9.16E-01 | 1.000 | heart development                                                                              |
| GO:0009055 | FUNCTION | 198  | 3  | 9.16E-01 | 1.000 | electron carrier activity                                                                      |
| GO:0006468 | PROCESS  | 588  | 16 | 9.20E-01 | 1.000 | protein amino acid phosphorylation                                                             |
| GO:0030154 | PROCESS  | 1245 | 35 | 9.20E-01 | 1.000 | cell differentiation                                                                           |
| GO:0034645 | PROCESS  | 912  | 15 | 9.22E-01 | 1.000 | cellular macromolecule biosynthetic process                                                    |
| GO:0022008 | PROCESS  | 392  | 12 | 9.24E-01 | 1.000 | neurogenesis                                                                                   |
| GO:0009888 | PROCESS  | 537  | 10 | 9.25E-01 | 1.000 | tissue development                                                                             |
| GO:0008134 | FUNCTION | 450  | 8  | 9.27E-01 | 1.000 | transcription factor binding                                                                   |
| GO:0048729 | PROCESS  | 134  | 2  | 9.28E-01 | 1.000 | tissue morphogenesis                                                                           |
| GO:0006796 | PROCESS  | 848  | 23 | 9.29E-01 | 1.000 | phosphate metabolic process                                                                    |
| GO:0006793 | PROCESS  | 848  | 23 | 9.29E-01 | 1.000 | phosphorus metabolic process                                                                   |
| GO:0004714 | FUNCTION | 64   | 2  | 9.29E-01 | 1.000 | transmembrane receptor protein tyrosine kinase activity                                        |
| GO:0051338 | PROCESS  | 294  | 5  | 9.30E-01 | 1.000 | regulation of transferase activity                                                             |
| GO:0009898 | CELLULAR | 292  | 6  | 9.31E-01 | 1.000 | internal side of plasma membrane                                                               |
| GO:0005759 | CELLULAR | 210  | 2  | 9.32E-01 | 1.000 | mitochondrial matrix                                                                           |
| GO:0031980 | CELLULAR | 210  | 2  | 9.32E-01 | 1.000 | mitochondrial lumen                                                                            |
| GO:0034961 | PROCESS  | 731  | 10 | 9.34E-01 | 1.000 | cellular biopolymer biosynthetic process                                                       |
| GO:0051130 | PROCESS  | 137  | 2  | 9.36E-01 | 1.000 | positive regulation of cellular component organization                                         |
| GO:0048471 | CELLULAR | 223  | 4  | 9.36E-01 | 1.000 | perinuclear region of cytoplasm                                                                |

|            |          |      |    |          |       |                                            |
|------------|----------|------|----|----------|-------|--------------------------------------------|
| GO:0030182 | PROCESS  | 283  | 9  | 9.36E-01 | 1.000 | neuron differentiation                     |
| GO:0048869 | PROCESS  | 1286 | 35 | 9.45E-01 | 1.000 | cellular developmental process             |
| GO:0044463 | CELLULAR | 134  | 3  | 9.46E-01 | 1.000 | cell projection part                       |
| GO:0016310 | PROCESS  | 696  | 17 | 9.47E-01 | 1.000 | phosphorylation                            |
| GO:0005635 | CELLULAR | 176  | 2  | 9.49E-01 | 1.000 | nuclear envelope                           |
| GO:0044431 | CELLULAR | 257  | 5  | 9.56E-01 | 1.000 | Golgi apparatus part                       |
| GO:0007626 | PROCESS  | 216  | 4  | 9.57E-01 | 1.000 | locomotory behavior                        |
| GO:0032502 | PROCESS  | 2538 | 71 | 9.59E-01 | 1.000 | developmental process                      |
| GO:0042325 | PROCESS  | 373  | 6  | 9.59E-01 | 1.000 | regulation of phosphorylation              |
| GO:0005506 | FUNCTION | 278  | 4  | 9.59E-01 | 1.000 | iron ion binding                           |
| GO:0005198 | FUNCTION | 555  | 9  | 9.60E-01 | 1.000 | structural molecule activity               |
| GO:0048731 | PROCESS  | 1804 | 51 | 9.67E-01 | 1.000 | system development                         |
| GO:0007156 | PROCESS  | 131  | 3  | 9.69E-01 | 1.000 | homophilic cell adhesion                   |
| GO:0005975 | PROCESS  | 455  | 7  | 9.70E-01 | 1.000 | carbohydrate metabolic process             |
| GO:0007420 | PROCESS  | 184  | 4  | 9.72E-01 | 1.000 | brain development                          |
| GO:0019220 | PROCESS  | 387  | 6  | 9.73E-01 | 1.000 | regulation of phosphate metabolic process  |
| GO:0051174 | PROCESS  | 387  | 6  | 9.73E-01 | 1.000 | regulation of phosphorus metabolic process |
| GO:0007417 | PROCESS  | 293  | 8  | 9.78E-01 | 1.000 | central nervous system development         |
| GO:0048856 | PROCESS  | 1940 | 53 | 9.80E-01 | 1.000 | anatomical structure development           |
| GO:0007243 | PROCESS  | 292  | 4  | 9.81E-01 | 1.000 | protein kinase cascade                     |
| GO:0044262 | PROCESS  | 257  | 3  | 9.83E-01 | 1.000 | cellular carbohydrate metabolic process    |
| GO:0019904 | FUNCTION | 253  | 4  | 9.86E-01 | 1.000 | protein domain specific binding            |
| GO:0007399 | PROCESS  | 802  | 21 | 9.98E-01 | 1.000 | nervous system development                 |
