# Supplementary material for: Genetic Evidence Implicates the Immune System and Cholesterol Metabolism in the Aetiology of Alzheimer's Disease
Source: PubMed Central journal article supplement (PMC2981526; doi:10.1371/journal.pone.0013950), 2010-11-15
Supplement: pone.0013950.s002.pdf [file pone.0013950.s002.pdf]

**Table S2 Gene ontology categories identified by ALIGATOR analysis of the AD GWA data of Lambert and colleagues (8)**

The 423 genes identified as having GWAS SNP signals  $p < 0.001$  were used: APOE was included in the gene list. In this analysis one SNP was not allowed to add more than one gene to any gene ontology category. "Study-wide p-value" is the probability of obtaining by chance at least one GO category with a category-specific enrichment p-value at least as significant as that observed.

| GO process | Type     | total genes<br>in category | #genes on<br>list | p-value | Study-wide<br>corrected p-<br>value | Function                                                                                     |
|------------|----------|----------------------------|-------------------|---------|-------------------------------------|----------------------------------------------------------------------------------------------|
| GO:0032395 | FUNCTION | 8                          | 4                 | 0.0002  | 0.478                               | MHC class II receptor activity                                                               |
| GO:0004875 | FUNCTION | 3                          | 2                 | 0.0004  | 0.597                               | complement receptor activity                                                                 |
| GO:0042613 | CELLULAR | 12                         | 4                 | 0.0006  | 0.675                               | MHC class II protein complex                                                                 |
| GO:0002504 | PROCESS  | 15                         | 4                 | 0.0008  | 0.758                               | antigen processing and presentation of peptide or polysaccharide<br>antigen via MHC class II |
| GO:0030301 | PROCESS  | 34                         | 5                 | 0.0012  | 0.839                               | cholesterol transport                                                                        |
| GO:0015918 | PROCESS  | 34                         | 5                 | 0.0012  | 0.839                               | sterol transport                                                                             |
| GO:0031490 | FUNCTION | 7                          | 2                 | 0.0032  | 0.976                               | chromatin DNA binding                                                                        |
| GO:0019276 | PROCESS  | 3                          | 2                 | 0.0034  | 0.979                               | UDP-N-acetylgalactosamine metabolic process                                                  |
| GO:0005319 | FUNCTION | 57                         | 7                 | 0.0038  | 0.985                               | lipid transporter activity                                                                   |
| GO:0042611 | CELLULAR | 34                         | 4                 | 0.0050  | 0.996                               | MHC protein complex                                                                          |
| GO:0001848 | FUNCTION | 8                          | 2                 | 0.0066  | 0.999                               | complement binding                                                                           |
| GO:0045540 | PROCESS  | 7                          | 2                 | 0.0070  | 1                                   | regulation of cholesterol biosynthetic process                                               |
| GO:0005543 | FUNCTION | 153                        | 10                | 0.0084  | 1                                   | phospholipid binding                                                                         |
| GO:0043691 | PROCESS  | 14                         | 3                 | 0.0086  | 1                                   | reverse cholesterol transport                                                                |
| GO:0007271 | PROCESS  | 13                         | 2                 | 0.0090  | 1                                   | synaptic transmission, cholinergic                                                           |
| GO:0042632 | PROCESS  | 33                         | 4                 | 0.0092  | 1                                   | cholesterol homeostasis                                                                      |
| GO:0055092 | PROCESS  | 33                         | 4                 | 0.0092  | 1                                   | sterol homeostasis                                                                           |
| GO:0033344 | PROCESS  | 15                         | 3                 | 0.0108  | 1                                   | cholesterol efflux                                                                           |
| GO:0006958 | PROCESS  | 28                         | 3                 | 0.0108  | 1                                   | complement activation, classical pathway                                                     |
| GO:0002455 | PROCESS  | 28                         | 3                 | 0.0108  | 1                                   | humoral immune response mediated by circulating<br>immunoglobulin                            |
| GO:0015248 | FUNCTION | 14                         | 3                 | 0.0112  | 1                                   | sterol transporter activity                                                                  |
| GO:0051775 | PROCESS  | 6                          | 2                 | 0.0124  | 1                                   | response to redox state                                                                      |
| GO:0008289 | FUNCTION | 454                        | 20                | 0.0158  | 1                                   | lipid binding                                                                                |
| GO:0055088 | PROCESS  | 43                         | 4                 | 0.0170  | 1                                   | lipid homeostasis                                                                            |
| GO:0016525 | PROCESS  | 20                         | 3                 | 0.0174  | 1                                   | negative regulation of angiogenesis                                                          |
| GO:0032526 | PROCESS  | 14                         | 2                 | 0.0180  | 1                                   | response to retinoic acid                                                                    |
| GO:0003705 | FUNCTION | 29                         | 3                 | 0.0186  | 1                                   | RNA polymerase II transcription factor activity, enhancer binding                            |
| GO:0010872 | PROCESS  | 7                          | 2                 | 0.0198  | 1                                   | regulation of cholesterol esterification                                                     |
| GO:0033189 | PROCESS  | 15                         | 2                 | 0.0198  | 1                                   | response to vitamin A                                                                        |
| GO:0006040 | PROCESS  | 26                         | 3                 | 0.0202  | 1                                   | amino sugar metabolic process                                                                |
| GO:0006955 | PROCESS  | 570                        | 16                | 0.0214  | 1                                   | immune response                                                                              |
| GO:0031228 | CELLULAR | 46                         | 5                 | 0.0220  | 1                                   | intrinsic to Golgi membrane                                                                  |
| GO:0030195 | PROCESS  | 15                         | 2                 | 0.0220  | 1                                   | negative regulation of blood coagulation                                                     |
| GO:0051393 | FUNCTION | 3                          | 2                 | 0.0222  | 1                                   | alpha-actinin binding                                                                        |
| GO:0019882 | PROCESS  | 54                         | 4                 | 0.0224  | 1                                   | antigen processing and presentation                                                          |
| GO:0006956 | PROCESS  | 37                         | 3                 | 0.0226  | 1                                   | complement activation                                                                        |
| GO:0016592 | CELLULAR | 19                         | 2                 | 0.0226  | 1                                   | mediator complex                                                                             |
| GO:0002541 | PROCESS  | 38                         | 3                 | 0.0228  | 1                                   | activation of plasma proteins involved in acute inflammatory<br>response                     |
| GO:0007010 | PROCESS  | 354                        | 15                | 0.0232  | 1                                   | cytoskeleton organization                                                                    |
| GO:0005587 | CELLULAR | 4                          | 2                 | 0.0248  | 1                                   | collagen type IV                                                                             |
| GO:0034377 | PROCESS  | 11                         | 2                 | 0.0250  | 1                                   | plasma lipoprotein particle assembly                                                         |
| GO:0065005 | PROCESS  | 11                         | 2                 | 0.0250  | 1                                   | protein-lipid complex assembly                                                               |
| GO:0004364 | FUNCTION | 19                         | 2                 | 0.0252  | 1                                   | glutathione transferase activity                                                             |
| GO:0006997 | PROCESS  | 40                         | 3                 | 0.0258  | 1                                   | nucleus organization                                                                         |
| GO:0006297 | PROCESS  | 17                         | 2                 | 0.0258  | 1                                   | nucleotide-excision repair, DNA gap filling                                                  |
| GO:0050819 | PROCESS  | 17                         | 2                 | 0.0276  | 1                                   | negative regulation of coagulation                                                           |
| GO:0033700 | PROCESS  | 8                          | 2                 | 0.0278  | 1                                   | phospholipid efflux                                                                          |
| GO:0019748 | PROCESS  | 65                         | 4                 | 0.0308  | 1                                   | secondary metabolic process                                                                  |
| GO:0030935 | CELLULAR | 5                          | 2                 | 0.0318  | 1                                   | sheet-forming collagen                                                                       |
| GO:0002443 | PROCESS  | 66                         | 4                 | 0.0320  | 1                                   | leukocyte mediated immunity                                                                  |
| GO:0042805 | FUNCTION | 4                          | 2                 | 0.0324  | 1                                   | actinin binding                                                                              |
| GO:0032420 | CELLULAR | 12                         | 3                 | 0.0328  | 1                                   | stereocilium                                                                                 |
| GO:0006869 | PROCESS  | 131                        | 8                 | 0.0332  | 1                                   | lipid transport                                                                              |
| GO:0034375 | PROCESS  | 11                         | 2                 | 0.0348  | 1                                   | high-density lipoprotein particle remodeling                                                 |
| GO:0033293 | FUNCTION | 42                         | 3                 | 0.0350  | 1                                   | monocarboxylic acid binding                                                                  |
| GO:0051592 | PROCESS  | 37                         | 4                 | 0.0364  | 1                                   | response to calcium ion                                                                      |
| GO:0010038 | PROCESS  | 67                         | 5                 | 0.0376  | 1                                   | response to metal ion                                                                        |
| GO:0015931 | PROCESS  | 98                         | 5                 | 0.0394  | 1                                   | nucleobase, nucleoside, nucleotide and nucleic acid transport                                |

|            |          |      |    |        |   |                                                                      |
|------------|----------|------|----|--------|---|----------------------------------------------------------------------|
| GO:0050810 | PROCESS  | 17   | 2  | 0.0398 | 1 | regulation of steroid biosynthetic process                           |
| GO:0030414 | FUNCTION | 141  | 6  | 0.0400 | 1 | peptidase inhibitor activity                                         |
| GO:0032421 | CELLULAR | 13   | 3  | 0.0400 | 1 | stereocilium bundle                                                  |
| GO:0034364 | CELLULAR | 20   | 2  | 0.0406 | 1 | high-density lipoprotein particle                                    |
| GO:0010596 | PROCESS  | 12   | 2  | 0.0408 | 1 | negative regulation of endothelial cell migration                    |
| GO:0016064 | PROCESS  | 44   | 3  | 0.0412 | 1 | immunoglobulin mediated immune response                              |
| GO:0010035 | PROCESS  | 72   | 5  | 0.0422 | 1 | response to inorganic substance                                      |
| GO:0010876 | PROCESS  | 142  | 8  | 0.0426 | 1 | lipid localization                                                   |
| GO:0019724 | PROCESS  | 46   | 3  | 0.0450 | 1 | B cell mediated immunity                                             |
| GO:0045940 | PROCESS  | 11   | 2  | 0.0464 | 1 | positive regulation of steroid metabolic process                     |
| GO:0005634 | CELLULAR | 4560 | 86 | 0.0474 | 1 | nucleus                                                              |
| GO:0051179 | PROCESS  | 2732 | 80 | 0.0486 | 1 | localization                                                         |
| GO:0044445 | CELLULAR | 128  | 4  | 0.0506 | 1 | cytosolic part                                                       |
| GO:0048168 | PROCESS  | 16   | 2  | 0.0510 | 1 | regulation of neuronal synaptic plasticity                           |
| GO:0015914 | PROCESS  | 28   | 4  | 0.0526 | 1 | phospholipid transport                                               |
| GO:0000139 | CELLULAR | 172  | 8  | 0.0530 | 1 | Golgi membrane                                                       |
| GO:0008376 | FUNCTION | 31   | 4  | 0.0558 | 1 | acetylgalactosaminyltransferase activity                             |
| GO:0046068 | PROCESS  | 9    | 2  | 0.0558 | 1 | cGMP metabolic process                                               |
| GO:0030261 | PROCESS  | 24   | 2  | 0.0564 | 1 | chromosome condensation                                              |
| GO:0051605 | PROCESS  | 65   | 4  | 0.0566 | 1 | protein maturation by peptide bond cleavage                          |
| GO:0009225 | PROCESS  | 11   | 2  | 0.0572 | 1 | nucleotide-sugar metabolic process                                   |
| GO:0015485 | FUNCTION | 15   | 2  | 0.0576 | 1 | cholesterol binding                                                  |
| GO:0017127 | FUNCTION | 12   | 2  | 0.0578 | 1 | cholesterol transporter activity                                     |
| GO:0012505 | CELLULAR | 681  | 22 | 0.0586 | 1 | endomembrane system                                                  |
| GO:0051235 | PROCESS  | 53   | 3  | 0.0590 | 1 | maintenance of location                                              |
| GO:0006952 | PROCESS  | 510  | 14 | 0.0596 | 1 | defense response                                                     |
| GO:0048738 | PROCESS  | 28   | 3  | 0.0596 | 1 | cardiac muscle tissue development                                    |
| GO:0005548 | FUNCTION | 28   | 4  | 0.0598 | 1 | phospholipid transporter activity                                    |
| GO:0030374 | FUNCTION | 30   | 2  | 0.0602 | 1 | ligand-dependent nuclear receptor transcription coactivator activity |
| GO:0001937 | PROCESS  | 17   | 2  | 0.0608 | 1 | negative regulation of endothelial cell proliferation                |
| GO:0015294 | FUNCTION | 74   | 5  | 0.0608 | 1 | solute:cation symporter activity                                     |
| GO:0016485 | PROCESS  | 95   | 5  | 0.0616 | 1 | protein processing                                                   |
| GO:0015293 | FUNCTION | 121  | 7  | 0.0620 | 1 | symporter activity                                                   |
| GO:0030193 | PROCESS  | 25   | 2  | 0.0626 | 1 | regulation of blood coagulation                                      |
| GO:0005902 | CELLULAR | 25   | 3  | 0.0626 | 1 | microvillus                                                          |
| GO:0001764 | PROCESS  | 42   | 4  | 0.0634 | 1 | neuron migration                                                     |
| GO:0004867 | FUNCTION | 88   | 4  | 0.0664 | 1 | serine-type endopeptidase inhibitor activity                         |
| GO:0005504 | FUNCTION | 28   | 2  | 0.0668 | 1 | fatty acid binding                                                   |
| GO:0001523 | PROCESS  | 20   | 2  | 0.0672 | 1 | retinoid metabolic process                                           |
| GO:0016101 | PROCESS  | 20   | 2  | 0.0672 | 1 | diterpenoid metabolic process                                        |
| GO:0033273 | PROCESS  | 22   | 2  | 0.0674 | 1 | response to vitamin                                                  |
| GO:0008375 | FUNCTION | 35   | 3  | 0.0684 | 1 | acetylglucosaminyltransferase activity                               |
| GO:0031290 | PROCESS  | 9    | 2  | 0.0688 | 1 | retinal ganglion cell axon guidance                                  |
| GO:0004690 | FUNCTION | 8    | 2  | 0.0692 | 1 | cyclic nucleotide-dependent protein kinase activity                  |
| GO:0050658 | PROCESS  | 83   | 4  | 0.0706 | 1 | RNA transport                                                        |
| GO:0050657 | PROCESS  | 83   | 4  | 0.0706 | 1 | nucleic acid transport                                               |
| GO:0051236 | PROCESS  | 83   | 4  | 0.0706 | 1 | establishment of RNA localization                                    |
| GO:0006721 | PROCESS  | 22   | 2  | 0.0720 | 1 | terpenoid metabolic process                                          |
| GO:0051604 | PROCESS  | 104  | 5  | 0.0722 | 1 | protein maturation                                                   |
| GO:0050818 | PROCESS  | 27   | 2  | 0.0722 | 1 | regulation of coagulation                                            |
| GO:0034369 | PROCESS  | 18   | 2  | 0.0740 | 1 | plasma lipoprotein particle remodeling                               |
| GO:0034368 | PROCESS  | 18   | 2  | 0.0740 | 1 | protein-lipid complex remodeling                                     |
| GO:0034367 | PROCESS  | 18   | 2  | 0.0740 | 1 | macromolecular complex remodeling                                    |
| GO:0051234 | PROCESS  | 2346 | 66 | 0.0742 | 1 | establishment of localization                                        |
| GO:0022603 | PROCESS  | 231  | 10 | 0.0758 | 1 | regulation of anatomical structure morphogenesis                     |
| GO:0007051 | PROCESS  | 39   | 2  | 0.0758 | 1 | spindle organization                                                 |
| GO:0015934 | CELLULAR | 58   | 2  | 0.0758 | 1 | large ribosomal subunit                                              |
| GO:0030173 | CELLULAR | 43   | 4  | 0.0760 | 1 | integral to Golgi membrane                                           |
| GO:0030099 | PROCESS  | 64   | 3  | 0.0776 | 1 | myeloid cell differentiation                                         |
| GO:0006917 | PROCESS  | 227  | 8  | 0.0780 | 1 | induction of apoptosis                                               |
| GO:0019538 | PROCESS  | 2512 | 58 | 0.0784 | 1 | protein metabolic process                                            |
| GO:0006081 | PROCESS  | 25   | 2  | 0.0786 | 1 | cellular aldehyde metabolic process                                  |
| GO:0009593 | PROCESS  | 29   | 3  | 0.0802 | 1 | detection of chemical stimulus                                       |
| GO:0031098 | PROCESS  | 50   | 3  | 0.0804 | 1 | stress-activated protein kinase signaling pathway                    |
| GO:0002449 | PROCESS  | 56   | 3  | 0.0808 | 1 | lymphocyte mediated immunity                                         |
| GO:0015291 | FUNCTION | 186  | 9  | 0.0810 | 1 | secondary active transmembrane transporter activity                  |
| GO:0050896 | PROCESS  | 2782 | 59 | 0.0812 | 1 | response to stimulus                                                 |
| GO:0030518 | PROCESS  | 53   | 3  | 0.0814 | 1 | steroid hormone receptor signaling pathway                           |
| GO:0015301 | FUNCTION | 19   | 2  | 0.0818 | 1 | anion:anion antiporter activity                                      |
| GO:0006954 | PROCESS  | 263  | 8  | 0.0824 | 1 | inflammatory response                                                |

|            |          |      |    |        |   |                                                                                                                           |
|------------|----------|------|----|--------|---|---------------------------------------------------------------------------------------------------------------------------|
| GO:0006044 | PROCESS  | 20   | 2  | 0.0830 | 1 | N-acetylglucosamine metabolic process                                                                                     |
| GO:0005769 | CELLULAR | 64   | 3  | 0.0832 | 1 | early endosome                                                                                                            |
| GO:0051028 | PROCESS  | 74   | 3  | 0.0834 | 1 | mRNA transport                                                                                                            |
| GO:0006403 | PROCESS  | 85   | 4  | 0.0846 | 1 | RNA localization                                                                                                          |
| GO:0004871 | FUNCTION | 1929 | 55 | 0.0850 | 1 | signal transducer activity                                                                                                |
| GO:0060089 | FUNCTION | 1929 | 55 | 0.0850 | 1 | molecular transducer activity                                                                                             |
| GO:0001843 | PROCESS  | 17   | 2  | 0.0850 | 1 | neural tube closure                                                                                                       |
| GO:0060606 | PROCESS  | 17   | 2  | 0.0850 | 1 | tube closure                                                                                                              |
| GO:0006041 | PROCESS  | 21   | 2  | 0.0860 | 1 | glucosamine metabolic process                                                                                             |
| GO:0006096 | PROCESS  | 38   | 2  | 0.0862 | 1 | glycolysis                                                                                                                |
| GO:0002460 | PROCESS  | 61   | 3  | 0.0874 | 1 | adaptive immune response based on somatic recombination of immune receptors built from immunoglobulin superfamily domains |
| GO:0002250 | PROCESS  | 61   | 3  | 0.0874 | 1 | adaptive immune response                                                                                                  |
| GO:0016055 | PROCESS  | 104  | 4  | 0.0878 | 1 | Wnt receptor signaling pathway                                                                                            |
| GO:0050767 | PROCESS  | 110  | 6  | 0.0888 | 1 | regulation of neurogenesis                                                                                                |
| GO:0008194 | FUNCTION | 112  | 6  | 0.0890 | 1 | UDP-glycosyltransferase activity                                                                                          |
| GO:0012502 | PROCESS  | 228  | 8  | 0.0892 | 1 | induction of programmed cell death                                                                                        |
| GO:0031985 | CELLULAR | 18   | 2  | 0.0902 | 1 | Golgi cisterna                                                                                                            |
| GO:0004866 | FUNCTION | 134  | 5  | 0.0904 | 1 | endopeptidase inhibitor activity                                                                                          |
| GO:0005328 | FUNCTION | 17   | 2  | 0.0906 | 1 | neurotransmitter:sodium symporter activity                                                                                |
| GO:0035148 | PROCESS  | 18   | 2  | 0.0914 | 1 | tube lumen formation                                                                                                      |
| GO:0044238 | PROCESS  | 4851 | 98 | 0.0918 | 1 | primary metabolic process                                                                                                 |
| GO:0014020 | PROCESS  | 19   | 2  | 0.0940 | 1 | primary neural tube formation                                                                                             |
| GO:0004674 | FUNCTION | 393  | 15 | 0.0942 | 1 | protein serine/threonine kinase activity                                                                                  |
| GO:0031300 | CELLULAR | 135  | 6  | 0.0946 | 1 | intrinsic to organelle membrane                                                                                           |
| GO:0050866 | PROCESS  | 37   | 2  | 0.0948 | 1 | negative regulation of cell activation                                                                                    |
| GO:0005086 | FUNCTION | 16   | 2  | 0.0960 | 1 | ARF guanyl-nucleotide exchange factor activity                                                                            |
| GO:0004722 | FUNCTION | 41   | 2  | 0.0984 | 1 | protein serine/threonine phosphatase activity                                                                             |
| GO:0016455 | FUNCTION | 27   | 2  | 0.0990 | 1 | RNA polymerase II transcription mediator activity                                                                         |
| GO:0034358 | CELLULAR | 30   | 2  | 0.0994 | 1 | plasma lipoprotein particle                                                                                               |
| GO:0032994 | CELLULAR | 30   | 2  | 0.0994 | 1 | protein-lipid complex                                                                                                     |
| GO:0003702 | FUNCTION | 217  | 7  | 0.1004 | 1 | RNA polymerase II transcription factor activity                                                                           |
| GO:0032934 | FUNCTION | 22   | 2  | 0.1006 | 1 | sterol binding                                                                                                            |
| GO:0008015 | PROCESS  | 143  | 6  | 0.1022 | 1 | blood circulation                                                                                                         |
| GO:0003013 | PROCESS  | 143  | 6  | 0.1022 | 1 | circulatory system process                                                                                                |
| GO:0007059 | PROCESS  | 72   | 3  | 0.1026 | 1 | chromosome segregation                                                                                                    |
| GO:0043407 | PROCESS  | 30   | 2  | 0.1046 | 1 | negative regulation of MAP kinase activity                                                                                |
| GO:0006996 | PROCESS  | 1114 | 26 | 0.1048 | 1 | organelle organization                                                                                                    |
| GO:0046890 | PROCESS  | 30   | 2  | 0.1048 | 1 | regulation of lipid biosynthetic process                                                                                  |
| GO:0002376 | PROCESS  | 805  | 19 | 0.1056 | 1 | immune system process                                                                                                     |
| GO:0015459 | FUNCTION | 22   | 2  | 0.1066 | 1 | potassium channel regulator activity                                                                                      |
| GO:0051018 | FUNCTION | 9    | 2  | 0.1080 | 1 | protein kinase A binding                                                                                                  |
| GO:0002252 | PROCESS  | 95   | 4  | 0.1088 | 1 | immune effector process                                                                                                   |
| GO:0006810 | PROCESS  | 2324 | 64 | 0.1106 | 1 | transport                                                                                                                 |
| GO:0005326 | FUNCTION | 20   | 2  | 0.1106 | 1 | neurotransmitter transporter activity                                                                                     |
| GO:0055037 | CELLULAR | 18   | 2  | 0.1108 | 1 | recycling endosome                                                                                                        |
| GO:0002526 | PROCESS  | 74   | 3  | 0.1118 | 1 | acute inflammatory response                                                                                               |
| GO:0031984 | CELLULAR | 20   | 2  | 0.1128 | 1 | organelle subcompartment                                                                                                  |
| GO:0050768 | PROCESS  | 30   | 2  | 0.1130 | 1 | negative regulation of neurogenesis                                                                                       |
| GO:0006007 | PROCESS  | 45   | 2  | 0.1136 | 1 | glucose catabolic process                                                                                                 |
| GO:0003007 | PROCESS  | 59   | 3  | 0.1144 | 1 | heart morphogenesis                                                                                                       |
| GO:0051960 | PROCESS  | 125  | 6  | 0.1154 | 1 | regulation of nervous system development                                                                                  |
| GO:0000794 | CELLULAR | 36   | 2  | 0.1180 | 1 | condensed nuclear chromosome                                                                                              |
| GO:0001841 | PROCESS  | 24   | 2  | 0.1188 | 1 | neural tube formation                                                                                                     |
| GO:0006915 | PROCESS  | 445  | 12 | 0.1190 | 1 | apoptosis                                                                                                                 |
| GO:0055007 | PROCESS  | 17   | 2  | 0.1204 | 1 | cardiac muscle cell differentiation                                                                                       |
| GO:0006066 | PROCESS  | 339  | 10 | 0.1212 | 1 | alcohol metabolic process                                                                                                 |
| GO:0030675 | FUNCTION | 8    | 2  | 0.1220 | 1 | Rac GTPase activator activity                                                                                             |
| GO:0030336 | PROCESS  | 49   | 3  | 0.1226 | 1 | negative regulation of cell migration                                                                                     |
| GO:0030522 | PROCESS  | 63   | 3  | 0.1228 | 1 | intracellular receptor-mediated signaling pathway                                                                         |
| GO:0005768 | CELLULAR | 260  | 8  | 0.1238 | 1 | endosome                                                                                                                  |
| GO:0045087 | PROCESS  | 120  | 4  | 0.1238 | 1 | innate immune response                                                                                                    |
| GO:0005513 | PROCESS  | 9    | 2  | 0.1248 | 1 | detection of calcium ion                                                                                                  |
| GO:0006979 | PROCESS  | 106  | 4  | 0.1254 | 1 | response to oxidative stress                                                                                              |
| GO:0043170 | PROCESS  | 3772 | 76 | 0.1258 | 1 | macromolecule metabolic process                                                                                           |
| GO:0001838 | PROCESS  | 25   | 2  | 0.1264 | 1 | embryonic epithelial tube formation                                                                                       |
| GO:0005215 | FUNCTION | 1072 | 36 | 0.1268 | 1 | transporter activity                                                                                                      |
| GO:0012501 | PROCESS  | 452  | 12 | 0.1270 | 1 | programmed cell death                                                                                                     |
| GO:0033036 | PROCESS  | 943  | 25 | 0.1274 | 1 | macromolecule localization                                                                                                |
| GO:0006469 | PROCESS  | 72   | 3  | 0.1276 | 1 | negative regulation of protein kinase activity                                                                            |
| GO:0019239 | FUNCTION | 24   | 2  | 0.1282 | 1 | deaminase activity                                                                                                        |

|            |          |      |    |        |   |                                                                             |
|------------|----------|------|----|--------|---|-----------------------------------------------------------------------------|
| GO:0008624 | PROCESS  | 59   | 3  | 0.1286 | 1 | induction of apoptosis by extracellular signals                             |
| GO:0045664 | PROCESS  | 85   | 5  | 0.1286 | 1 | regulation of neuron differentiation                                        |
| GO:0015297 | FUNCTION | 59   | 4  | 0.1292 | 1 | antiporter activity                                                         |
| GO:0007242 | PROCESS  | 1079 | 31 | 0.1294 | 1 | intracellular signaling cascade                                             |
| GO:0010721 | PROCESS  | 32   | 2  | 0.1294 | 1 | negative regulation of cell development                                     |
| GO:0042596 | PROCESS  | 14   | 2  | 0.1308 | 1 | fear response                                                               |
| GO:0004672 | FUNCTION | 556  | 20 | 0.1318 | 1 | protein kinase activity                                                     |
| GO:0016757 | FUNCTION | 250  | 9  | 0.1320 | 1 | transferase activity, transferring glycosyl groups                          |
| GO:0004872 | FUNCTION | 1515 | 42 | 0.1324 | 1 | receptor activity                                                           |
| GO:0007283 | PROCESS  | 228  | 6  | 0.1330 | 1 | spermatogenesis                                                             |
| GO:0048232 | PROCESS  | 228  | 6  | 0.1330 | 1 | male gamete generation                                                      |
| GO:0005227 | FUNCTION | 17   | 2  | 0.1330 | 1 | calcium activated cation channel activity                                   |
| GO:0002253 | PROCESS  | 66   | 3  | 0.1332 | 1 | activation of immune response                                               |
| GO:0006829 | PROCESS  | 23   | 2  | 0.1354 | 1 | zinc ion transport                                                          |
| GO:0016125 | PROCESS  | 87   | 4  | 0.1364 | 1 | sterol metabolic process                                                    |
| GO:0042169 | FUNCTION | 21   | 2  | 0.1366 | 1 | SH2 domain binding                                                          |
| GO:0033673 | PROCESS  | 76   | 3  | 0.1376 | 1 | negative regulation of kinase activity                                      |
| GO:0005003 | FUNCTION | 17   | 2  | 0.1376 | 1 | ephrin receptor activity                                                    |
| GO:0043086 | PROCESS  | 233  | 7  | 0.1382 | 1 | negative regulation of catalytic activity                                   |
| GO:0006959 | PROCESS  | 68   | 3  | 0.1388 | 1 | humoral immune response                                                     |
| GO:0016740 | FUNCTION | 1562 | 41 | 0.1392 | 1 | transferase activity                                                        |
| GO:0015370 | FUNCTION | 43   | 3  | 0.1394 | 1 | solute:sodium symporter activity                                            |
| GO:0000910 | PROCESS  | 36   | 2  | 0.1396 | 1 | cytokinesis                                                                 |
| GO:0021575 | PROCESS  | 16   | 2  | 0.1398 | 1 | hindbrain morphogenesis                                                     |
| GO:0045786 | PROCESS  | 65   | 3  | 0.1424 | 1 | negative regulation of cell cycle                                           |
| GO:0006950 | PROCESS  | 1330 | 29 | 0.1430 | 1 | response to stress                                                          |
| GO:0031329 | PROCESS  | 40   | 2  | 0.1452 | 1 | regulation of cellular catabolic process                                    |
| GO:0045834 | PROCESS  | 30   | 2  | 0.1484 | 1 | positive regulation of lipid metabolic process                              |
| GO:0043623 | PROCESS  | 134  | 4  | 0.1486 | 1 | cellular protein complex assembly                                           |
| GO:0030036 | PROCESS  | 187  | 8  | 0.1488 | 1 | actin cytoskeleton organization                                             |
| GO:0022892 | FUNCTION | 878  | 31 | 0.1492 | 1 | substrate-specific transporter activity                                     |
| GO:0007265 | PROCESS  | 92   | 4  | 0.1496 | 1 | Ras protein signal transduction                                             |
| GO:0035051 | PROCESS  | 20   | 2  | 0.1516 | 1 | cardiac cell differentiation                                                |
| GO:0042054 | FUNCTION | 38   | 2  | 0.1532 | 1 | histone methyltransferase activity                                          |
| GO:0051348 | PROCESS  | 81   | 3  | 0.1534 | 1 | negative regulation of transferase activity                                 |
| GO:0044267 | PROCESS  | 2072 | 46 | 0.1542 | 1 | cellular protein metabolic process                                          |
| GO:0016765 | FUNCTION | 46   | 2  | 0.1552 | 1 | transferase activity, transferring alkyl or aryl (other than methyl) groups |
| GO:0019897 | CELLULAR | 44   | 3  | 0.1566 | 1 | extrinsic to plasma membrane                                                |
| GO:0051651 | PROCESS  | 41   | 2  | 0.1588 | 1 | maintenance of location in cell                                             |
| GO:0001654 | PROCESS  | 91   | 4  | 0.1610 | 1 | eye development                                                             |
| GO:0019218 | PROCESS  | 27   | 2  | 0.1616 | 1 | regulation of steroid metabolic process                                     |
| GO:0006836 | PROCESS  | 67   | 4  | 0.1616 | 1 | neurotransmitter transport                                                  |
| GO:0006412 | PROCESS  | 274  | 5  | 0.1618 | 1 | translation                                                                 |
| GO:0015833 | PROCESS  | 34   | 2  | 0.1618 | 1 | peptide transport                                                           |
| GO:0016773 | FUNCTION | 664  | 22 | 0.1626 | 1 | phosphotransferase activity, alcohol group as acceptor                      |
| GO:0000165 | PROCESS  | 142  | 5  | 0.1632 | 1 | MAPKKK cascade                                                              |
| GO:0043065 | PROCESS  | 303  | 9  | 0.1640 | 1 | positive regulation of apoptosis                                            |
| GO:0016251 | FUNCTION | 47   | 2  | 0.1652 | 1 | general RNA polymerase II transcription factor activity                     |
| GO:0003777 | FUNCTION | 72   | 4  | 0.1656 | 1 | microtubule motor activity                                                  |
| GO:0005996 | PROCESS  | 165  | 5  | 0.1672 | 1 | monosaccharide metabolic process                                            |
| GO:0006289 | PROCESS  | 51   | 2  | 0.1680 | 1 | nucleotide-excision repair                                                  |
| GO:0019320 | PROCESS  | 55   | 2  | 0.1684 | 1 | hexose catabolic process                                                    |
| GO:0060284 | PROCESS  | 138  | 6  | 0.1690 | 1 | regulation of cell development                                              |
| GO:0006928 | PROCESS  | 360  | 15 | 0.1694 | 1 | cell motion                                                                 |
| GO:0051674 | PROCESS  | 360  | 15 | 0.1694 | 1 | localization of cell                                                        |
| GO:0055085 | PROCESS  | 204  | 6  | 0.1718 | 1 | transmembrane transport                                                     |
| GO:0016247 | FUNCTION | 46   | 3  | 0.1728 | 1 | channel regulator activity                                                  |
| GO:0005581 | CELLULAR | 33   | 3  | 0.1740 | 1 | collagen                                                                    |
| GO:0050770 | PROCESS  | 36   | 3  | 0.1750 | 1 | regulation of axonogenesis                                                  |
| GO:0007165 | PROCESS  | 3008 | 76 | 0.1752 | 1 | signal transduction                                                         |
| GO:0050793 | PROCESS  | 1051 | 28 | 0.1756 | 1 | regulation of developmental process                                         |
| GO:0005102 | FUNCTION | 771  | 20 | 0.1760 | 1 | receptor binding                                                            |
| GO:0006629 | PROCESS  | 733  | 19 | 0.1762 | 1 | lipid metabolic process                                                     |
| GO:0005085 | FUNCTION | 140  | 8  | 0.1762 | 1 | guanyl-nucleotide exchange factor activity                                  |
| GO:0005125 | FUNCTION | 191  | 4  | 0.1762 | 1 | cytokine activity                                                           |
| GO:0009055 | FUNCTION | 197  | 6  | 0.1770 | 1 | electron carrier activity                                                   |
| GO:0005794 | CELLULAR | 771  | 23 | 0.1802 | 1 | Golgi apparatus                                                             |
| GO:0016310 | PROCESS  | 694  | 21 | 0.1804 | 1 | phosphorylation                                                             |
| GO:0009059 | PROCESS  | 929  | 19 | 0.1818 | 1 | macromolecule biosynthetic process                                          |
| GO:0044275 | PROCESS  | 57   | 2  | 0.1824 | 1 | cellular carbohydrate catabolic process                                     |

|            |          |      |    |        |   |                                                      |
|------------|----------|------|----|--------|---|------------------------------------------------------|
| GO:0007411 | PROCESS  | 70   | 6  | 0.1828 | 1 | axon guidance                                        |
| GO:0008373 | FUNCTION | 20   | 2  | 0.1832 | 1 | sialyltransferase activity                           |
| GO:0048523 | PROCESS  | 1310 | 31 | 0.1836 | 1 | negative regulation of cellular process              |
| GO:0016301 | FUNCTION | 713  | 23 | 0.1836 | 1 | kinase activity                                      |
| GO:0005975 | PROCESS  | 454  | 12 | 0.1840 | 1 | carbohydrate metabolic process                       |
| GO:0005789 | CELLULAR | 229  | 7  | 0.1850 | 1 | endoplasmic reticulum membrane                       |
| GO:0043283 | PROCESS  | 3666 | 73 | 0.1858 | 1 | biopolymer metabolic process                         |
| GO:0006163 | PROCESS  | 155  | 6  | 0.1858 | 1 | purine nucleotide metabolic process                  |
| GO:0030029 | PROCESS  | 203  | 8  | 0.1878 | 1 | actin filament-based process                         |
| GO:0016763 | FUNCTION | 45   | 2  | 0.1886 | 1 | transferase activity, transferring pentosyl groups   |
| GO:0043068 | PROCESS  | 305  | 9  | 0.1896 | 1 | positive regulation of programmed cell death         |
| GO:0005777 | CELLULAR | 97   | 3  | 0.1900 | 1 | peroxisome                                           |
| GO:0042579 | CELLULAR | 97   | 3  | 0.1900 | 1 | microbody                                            |
| GO:0043405 | PROCESS  | 115  | 4  | 0.1910 | 1 | regulation of MAP kinase activity                    |
| GO:0031327 | PROCESS  | 459  | 12 | 0.1914 | 1 | negative regulation of cellular biosynthetic process |
| GO:0051301 | PROCESS  | 266  | 6  | 0.1914 | 1 | cell division                                        |
| GO:0015457 | FUNCTION | 50   | 3  | 0.1932 | 1 | auxiliary transport protein activity                 |
| GO:0006720 | PROCESS  | 41   | 2  | 0.1934 | 1 | isoprenoid metabolic process                         |
| GO:0006818 | PROCESS  | 55   | 2  | 0.1942 | 1 | hydrogen transport                                   |
| GO:0048878 | PROCESS  | 382  | 12 | 0.1958 | 1 | chemical homeostasis                                 |
| GO:0008276 | FUNCTION | 47   | 2  | 0.1958 | 1 | protein methyltransferase activity                   |
| GO:0006024 | PROCESS  | 20   | 2  | 0.1960 | 1 | glycosaminoglycan biosynthetic process               |
| GO:0010942 | PROCESS  | 308  | 9  | 0.1968 | 1 | positive regulation of cell death                    |
| GO:0051271 | PROCESS  | 54   | 3  | 0.1968 | 1 | negative regulation of cell motion                   |
| GO:0045892 | PROCESS  | 283  | 8  | 0.1968 | 1 | negative regulation of transcription, DNA-dependent  |
| GO:0043284 | PROCESS  | 740  | 14 | 0.1970 | 1 | biopolymer biosynthetic process                      |
| GO:0044431 | CELLULAR | 257  | 9  | 0.1986 | 1 | Golgi apparatus part                                 |
| GO:0009890 | PROCESS  | 465  | 12 | 0.1986 | 1 | negative regulation of biosynthetic process          |
| GO:0000226 | PROCESS  | 108  | 3  | 0.2016 | 1 | microtubule cytoskeleton organization                |
| GO:0006023 | PROCESS  | 22   | 2  | 0.2016 | 1 | aminoglycan biosynthetic process                     |
| GO:0000793 | CELLULAR | 102  | 3  | 0.2032 | 1 | condensed chromosome                                 |
| GO:0051253 | PROCESS  | 288  | 8  | 0.2038 | 1 | negative regulation of RNA metabolic process         |
| GO:0016209 | FUNCTION | 44   | 2  | 0.2044 | 1 | antioxidant activity                                 |
| GO:0030145 | FUNCTION | 147  | 6  | 0.2050 | 1 | manganese ion binding                                |
| GO:0002009 | PROCESS  | 69   | 3  | 0.2054 | 1 | morphogenesis of an epithelium                       |
| GO:0048592 | PROCESS  | 54   | 3  | 0.2058 | 1 | eye morphogenesis                                    |
| GO:0006164 | PROCESS  | 130  | 5  | 0.2064 | 1 | purine nucleotide biosynthetic process               |
| GO:0048519 | PROCESS  | 1432 | 34 | 0.2072 | 1 | negative regulation of biological process            |
| GO:0043010 | PROCESS  | 71   | 3  | 0.2076 | 1 | camera-type eye development                          |
| GO:0009165 | PROCESS  | 165  | 6  | 0.2084 | 1 | nucleotide biosynthetic process                      |
| GO:0048609 | PROCESS  | 68   | 3  | 0.2102 | 1 | reproductive process in a multicellular organism     |
| GO:0032504 | PROCESS  | 68   | 3  | 0.2102 | 1 | multicellular organism reproduction                  |
| GO:0050865 | PROCESS  | 125  | 4  | 0.2114 | 1 | regulation of cell activation                        |
| GO:0034645 | PROCESS  | 911  | 18 | 0.2122 | 1 | cellular macromolecule biosynthetic process          |
| GO:0044260 | PROCESS  | 3299 | 64 | 0.2124 | 1 | cellular macromolecule metabolic process             |
| GO:0009152 | PROCESS  | 105  | 4  | 0.2124 | 1 | purine ribonucleotide biosynthetic process           |
| GO:0006323 | PROCESS  | 98   | 2  | 0.2124 | 1 | DNA packaging                                        |
| GO:0010975 | PROCESS  | 42   | 3  | 0.2126 | 1 | regulation of neuron projection development          |
| GO:0022604 | PROCESS  | 97   | 5  | 0.2136 | 1 | regulation of cell morphogenesis                     |
| GO:0060429 | PROCESS  | 116  | 4  | 0.2138 | 1 | epithelium development                               |
| GO:0033279 | CELLULAR | 112  | 2  | 0.2160 | 1 | ribosomal subunit                                    |
| GO:0051094 | PROCESS  | 504  | 14 | 0.2162 | 1 | positive regulation of developmental process         |
| GO:0006897 | PROCESS  | 181  | 7  | 0.2164 | 1 | endocytosis                                          |
| GO:0010324 | PROCESS  | 181  | 7  | 0.2164 | 1 | membrane invagination                                |
| GO:0032102 | PROCESS  | 30   | 2  | 0.2166 | 1 | negative regulation of response to external stimulus |
| GO:0046486 | PROCESS  | 127  | 4  | 0.2166 | 1 | glycerolipid metabolic process                       |
| GO:0004697 | FUNCTION | 14   | 2  | 0.2166 | 1 | protein kinase C activity                            |
| GO:0008324 | FUNCTION | 492  | 19 | 0.2172 | 1 | cation transmembrane transporter activity            |
| GO:0007017 | PROCESS  | 205  | 6  | 0.2172 | 1 | microtubule-based process                            |
| GO:0000776 | CELLULAR | 66   | 2  | 0.2172 | 1 | kinetochore                                          |
| GO:0005764 | CELLULAR | 189  | 5  | 0.2194 | 1 | lysosome                                             |
| GO:0000323 | CELLULAR | 189  | 5  | 0.2194 | 1 | lytic vacuole                                        |
| GO:0030258 | PROCESS  | 57   | 2  | 0.2196 | 1 | lipid modification                                   |
| GO:0007276 | PROCESS  | 285  | 7  | 0.2196 | 1 | gamete generation                                    |
| GO:0048585 | PROCESS  | 68   | 3  | 0.2204 | 1 | negative regulation of response to stimulus          |
| GO:0035091 | FUNCTION | 92   | 4  | 0.2204 | 1 | phosphoinositide binding                             |
| GO:0046907 | PROCESS  | 545  | 13 | 0.2206 | 1 | intracellular transport                              |
| GO:0050880 | PROCESS  | 41   | 2  | 0.2208 | 1 | regulation of blood vessel size                      |
| GO:0035150 | PROCESS  | 41   | 2  | 0.2208 | 1 | regulation of tube size                              |
| GO:0031324 | PROCESS  | 567  | 14 | 0.2212 | 1 | negative regulation of cellular metabolic process    |
| GO:0005643 | CELLULAR | 73   | 2  | 0.2218 | 1 | nuclear pore                                         |

|            |          |      |    |        |   |                                                                                       |
|------------|----------|------|----|--------|---|---------------------------------------------------------------------------------------|
| GO:0006766 | PROCESS  | 82   | 3  | 0.2220 | 1 | vitamin metabolic process                                                             |
| GO:0048015 | PROCESS  | 75   | 3  | 0.2220 | 1 | phosphoinositide-mediated signaling                                                   |
| GO:0042981 | PROCESS  | 607  | 15 | 0.2222 | 1 | regulation of apoptosis                                                               |
| GO:0046365 | PROCESS  | 64   | 2  | 0.2236 | 1 | monosaccharide catabolic process                                                      |
| GO:0005576 | CELLULAR | 1821 | 43 | 0.2248 | 1 | extracellular region                                                                  |
| GO:0016758 | FUNCTION | 170  | 6  | 0.2250 | 1 | transferase activity, transferring hexosyl groups                                     |
| GO:0006605 | PROCESS  | 180  | 5  | 0.2250 | 1 | protein targeting                                                                     |
| GO:0043687 | PROCESS  | 1041 | 29 | 0.2268 | 1 | post-translational protein modification                                               |
| GO:0016616 | FUNCTION | 96   | 3  | 0.2272 | 1 | oxidoreductase activity, acting on the CH-OH group of donors, NAD or NADP as acceptor |
| GO:0030148 | PROCESS  | 27   | 2  | 0.2274 | 1 | sphingolipid biosynthetic process                                                     |
| GO:0008202 | PROCESS  | 174  | 6  | 0.2282 | 1 | steroid metabolic process                                                             |
| GO:0015300 | FUNCTION | 48   | 3  | 0.2296 | 1 | solute:solute antiporter activity                                                     |
| GO:0051146 | PROCESS  | 34   | 2  | 0.2302 | 1 | striated muscle cell differentiation                                                  |
| GO:0051168 | PROCESS  | 52   | 2  | 0.2304 | 1 | nuclear export                                                                        |
| GO:0007194 | PROCESS  | 44   | 3  | 0.2310 | 1 | negative regulation of adenylate cyclase activity                                     |
| GO:0031280 | PROCESS  | 44   | 3  | 0.2310 | 1 | negative regulation of cyclase activity                                               |
| GO:0051350 | PROCESS  | 44   | 3  | 0.2310 | 1 | negative regulation of lyase activity                                                 |
| GO:0007154 | PROCESS  | 3311 | 83 | 0.2320 | 1 | cell communication                                                                    |
| GO:0021915 | PROCESS  | 41   | 2  | 0.2320 | 1 | neural tube development                                                               |
| GO:0016331 | PROCESS  | 41   | 2  | 0.2324 | 1 | morphogenesis of embryonic epithelium                                                 |
| GO:0042175 | CELLULAR | 242  | 7  | 0.2348 | 1 | nuclear envelope-endoplasmic reticulum network                                        |
| GO:0010769 | PROCESS  | 49   | 3  | 0.2354 | 1 | regulation of cell morphogenesis involved in differentiation                          |
| GO:0060090 | FUNCTION | 58   | 3  | 0.2356 | 1 | molecular adaptor activity                                                            |
| GO:0009117 | PROCESS  | 247  | 8  | 0.2362 | 1 | nucleotide metabolic process                                                          |
| GO:0006753 | PROCESS  | 247  | 8  | 0.2362 | 1 | nucleoside phosphate metabolic process                                                |
| GO:0007018 | PROCESS  | 96   | 4  | 0.2370 | 1 | microtubule-based movement                                                            |
| GO:0007169 | PROCESS  | 187  | 8  | 0.2372 | 1 | transmembrane receptor protein tyrosine kinase signaling pathway                      |
| GO:0007067 | PROCESS  | 200  | 4  | 0.2372 | 1 | mitosis                                                                               |
| GO:0000280 | PROCESS  | 200  | 4  | 0.2372 | 1 | nuclear division                                                                      |
| GO:0060562 | PROCESS  | 37   | 2  | 0.2384 | 1 | epithelial tube morphogenesis                                                         |
| GO:0007264 | PROCESS  | 247  | 7  | 0.2396 | 1 | small GTPase mediated signal transduction                                             |
| GO:0045184 | PROCESS  | 683  | 16 | 0.2406 | 1 | establishment of protein localization                                                 |
| GO:0048568 | PROCESS  | 36   | 2  | 0.2418 | 1 | embryonic organ development                                                           |
| GO:0000287 | FUNCTION | 420  | 13 | 0.2430 | 1 | magnesium ion binding                                                                 |
| GO:0035023 | PROCESS  | 88   | 5  | 0.2442 | 1 | regulation of Rho protein signal transduction                                         |
| GO:0009123 | PROCESS  | 55   | 3  | 0.2442 | 1 | nucleoside monophosphate metabolic process                                            |
| GO:0003018 | PROCESS  | 44   | 2  | 0.2444 | 1 | vascular process in circulatory system                                                |
| GO:0000087 | PROCESS  | 202  | 4  | 0.2456 | 1 | M phase of mitotic cell cycle                                                         |
| GO:0009058 | PROCESS  | 1655 | 34 | 0.2462 | 1 | biosynthetic process                                                                  |
| GO:0007229 | PROCESS  | 55   | 3  | 0.2462 | 1 | integrin-mediated signaling pathway                                                   |
| GO:0003677 | FUNCTION | 2129 | 37 | 0.2466 | 1 | DNA binding                                                                           |
| GO:0016481 | PROCESS  | 378  | 10 | 0.2480 | 1 | negative regulation of transcription                                                  |
| GO:0009150 | PROCESS  | 118  | 4  | 0.2494 | 1 | purine ribonucleotide metabolic process                                               |
| GO:0008305 | CELLULAR | 28   | 2  | 0.2496 | 1 | integrin complex                                                                      |
| GO:0043412 | PROCESS  | 1354 | 35 | 0.2500 | 1 | biopolymer modification                                                               |
| GO:0008170 | FUNCTION | 51   | 2  | 0.2514 | 1 | N-methyltransferase activity                                                          |
| GO:0051649 | PROCESS  | 694  | 17 | 0.2516 | 1 | establishment of localization in cell                                                 |
| GO:0005524 | FUNCTION | 1360 | 37 | 0.2518 | 1 | ATP binding                                                                           |
| GO:0006796 | PROCESS  | 847  | 25 | 0.2522 | 1 | phosphate metabolic process                                                           |
| GO:0006793 | PROCESS  | 847  | 25 | 0.2522 | 1 | phosphorus metabolic process                                                          |
| GO:0030554 | FUNCTION | 1446 | 39 | 0.2524 | 1 | adenyl nucleotide binding                                                             |
| GO:0006767 | PROCESS  | 52   | 2  | 0.2526 | 1 | water-soluble vitamin metabolic process                                               |
| GO:0044265 | PROCESS  | 690  | 13 | 0.2526 | 1 | cellular macromolecule catabolic process                                              |
| GO:0044092 | PROCESS  | 277  | 7  | 0.2536 | 1 | negative regulation of molecular function                                             |
| GO:0009100 | PROCESS  | 181  | 7  | 0.2548 | 1 | glycoprotein metabolic process                                                        |
| GO:0009888 | PROCESS  | 536  | 13 | 0.2552 | 1 | tissue development                                                                    |
| GO:0043025 | CELLULAR | 73   | 3  | 0.2552 | 1 | cell soma                                                                             |
| GO:0046467 | PROCESS  | 30   | 2  | 0.2558 | 1 | membrane lipid biosynthetic process                                                   |
| GO:0031090 | CELLULAR | 931  | 21 | 0.2588 | 1 | organelle membrane                                                                    |
| GO:0031344 | PROCESS  | 54   | 3  | 0.2596 | 1 | regulation of cell projection organization                                            |
| GO:0008203 | PROCESS  | 78   | 3  | 0.2598 | 1 | cholesterol metabolic process                                                         |
| GO:0006464 | PROCESS  | 1288 | 34 | 0.2604 | 1 | protein modification process                                                          |
| GO:0002682 | PROCESS  | 279  | 7  | 0.2606 | 1 | regulation of immune system process                                                   |
| GO:0048285 | PROCESS  | 207  | 4  | 0.2606 | 1 | organelle fission                                                                     |
| GO:0022414 | PROCESS  | 544  | 12 | 0.2608 | 1 | reproductive process                                                                  |
| GO:0035239 | PROCESS  | 70   | 3  | 0.2608 | 1 | tube morphogenesis                                                                    |
| GO:0022804 | FUNCTION | 319  | 12 | 0.2616 | 1 | active transmembrane transporter activity                                             |
| GO:0000003 | PROCESS  | 548  | 12 | 0.2618 | 1 | reproduction                                                                          |
| GO:0010558 | PROCESS  | 450  | 11 | 0.2618 | 1 | negative regulation of macromolecule biosynthetic process                             |

|            |          |      |    |        |   |                                                                                                                               |
|------------|----------|------|----|--------|---|-------------------------------------------------------------------------------------------------------------------------------|
| GO:0043067 | PROCESS  | 616  | 15 | 0.2626 | 1 | regulation of programmed cell death                                                                                           |
| GO:0014706 | PROCESS  | 95   | 4  | 0.2626 | 1 | striated muscle tissue development                                                                                            |
| GO:0010941 | PROCESS  | 618  | 15 | 0.2636 | 1 | regulation of cell death                                                                                                      |
| GO:0048598 | PROCESS  | 220  | 6  | 0.2640 | 1 | embryonic morphogenesis                                                                                                       |
| GO:0005100 | FUNCTION | 23   | 2  | 0.2646 | 1 | Rho GTPase activator activity                                                                                                 |
| GO:0044255 | PROCESS  | 598  | 15 | 0.2654 | 1 | cellular lipid metabolic process                                                                                              |
| GO:0007254 | PROCESS  | 47   | 2  | 0.2658 | 1 | JNK cascade                                                                                                                   |
| GO:0034961 | PROCESS  | 730  | 13 | 0.2662 | 1 | cellular biopolymer biosynthetic process                                                                                      |
| GO:0005802 | CELLULAR | 30   | 2  | 0.2668 | 1 | trans-Golgi network                                                                                                           |
| GO:0016614 | FUNCTION | 108  | 3  | 0.2672 | 1 | oxidoreductase activity, acting on CH-OH group of donors                                                                      |
| GO:0044420 | CELLULAR | 97   | 5  | 0.2684 | 1 | extracellular matrix part                                                                                                     |
| GO:0001883 | FUNCTION | 1462 | 39 | 0.2694 | 1 | purine nucleoside binding                                                                                                     |
| GO:0006650 | PROCESS  | 95   | 3  | 0.2694 | 1 | glycerophospholipid metabolic process                                                                                         |
| GO:0050727 | PROCESS  | 53   | 2  | 0.2696 | 1 | regulation of inflammatory response                                                                                           |
| GO:0031328 | PROCESS  | 535  | 14 | 0.2700 | 1 | positive regulation of cellular biosynthetic process                                                                          |
| GO:0003823 | FUNCTION | 40   | 2  | 0.2702 | 1 | antigen binding                                                                                                               |
| GO:0030802 | PROCESS  | 88   | 4  | 0.2704 | 1 | regulation of cyclic nucleotide biosynthetic process                                                                          |
| GO:0030808 | PROCESS  | 88   | 4  | 0.2704 | 1 | regulation of nucleotide biosynthetic process                                                                                 |
| GO:0044249 | PROCESS  | 1585 | 32 | 0.2706 | 1 | cellular biosynthetic process                                                                                                 |
| GO:0003700 | FUNCTION | 879  | 19 | 0.2712 | 1 | transcription factor activity                                                                                                 |
| GO:0050778 | PROCESS  | 93   | 3  | 0.2716 | 1 | positive regulation of immune response                                                                                        |
| GO:0006941 | PROCESS  | 30   | 2  | 0.2718 | 1 | striated muscle contraction                                                                                                   |
| GO:0009260 | PROCESS  | 112  | 4  | 0.2752 | 1 | ribonucleotide biosynthetic process                                                                                           |
| GO:0009891 | PROCESS  | 538  | 14 | 0.2756 | 1 | positive regulation of biosynthetic process                                                                                   |
| GO:0006260 | PROCESS  | 163  | 4  | 0.2758 | 1 | DNA replication                                                                                                               |
| GO:0032501 | PROCESS  | 3421 | 83 | 0.2762 | 1 | multicellular organismal process                                                                                              |
| GO:0007399 | PROCESS  | 801  | 28 | 0.2772 | 1 | nervous system development                                                                                                    |
| GO:0046164 | PROCESS  | 72   | 2  | 0.2780 | 1 | alcohol catabolic process                                                                                                     |
| GO:0010648 | PROCESS  | 205  | 6  | 0.2782 | 1 | negative regulation of cell communication                                                                                     |
| GO:0044262 | PROCESS  | 257  | 7  | 0.2790 | 1 | cellular carbohydrate metabolic process                                                                                       |
| GO:0032012 | PROCESS  | 41   | 2  | 0.2792 | 1 | regulation of ARF protein signal transduction                                                                                 |
| GO:0048593 | PROCESS  | 34   | 2  | 0.2802 | 1 | camera-type eye morphogenesis                                                                                                 |
| GO:0032559 | FUNCTION | 1374 | 37 | 0.2804 | 1 | adenyl ribonucleotide binding                                                                                                 |
| GO:0055086 | PROCESS  | 267  | 8  | 0.2804 | 1 | nucleobase, nucleoside and nucleotide metabolic process                                                                       |
| GO:0030384 | PROCESS  | 61   | 2  | 0.2820 | 1 | phosphoinositide metabolic process                                                                                            |
| GO:0001882 | FUNCTION | 1471 | 39 | 0.2824 | 1 | nucleoside binding                                                                                                            |
| GO:0060537 | PROCESS  | 100  | 4  | 0.2830 | 1 | muscle tissue development                                                                                                     |
| GO:0022411 | PROCESS  | 54   | 2  | 0.2848 | 1 | cellular component disassembly                                                                                                |
| GO:0051606 | PROCESS  | 98   | 4  | 0.2864 | 1 | detection of stimulus                                                                                                         |
| GO:0032787 | PROCESS  | 266  | 7  | 0.2876 | 1 | monocarboxylic acid metabolic process                                                                                         |
|            |          | 60   | 2  | 0.2892 | 1 | oxidoreductase activity, acting on single donors with incorporation of molecular oxygen, incorporation of two atoms of oxygen |
| GO:0016702 | FUNCTION |      |    |        |   |                                                                                                                               |
| GO:0051213 | FUNCTION | 60   | 2  | 0.2892 | 1 | dioxygenase activity                                                                                                          |
| GO:0044444 | CELLULAR | 4277 | 82 | 0.2898 | 1 | cytoplasmic part                                                                                                              |
| GO:0033555 | PROCESS  | 25   | 2  | 0.2898 | 1 | multicellular organismal response to stress                                                                                   |
|            |          | 61   | 2  | 0.2908 | 1 | oxidoreductase activity, acting on single donors with incorporation of molecular oxygen                                       |
| GO:0016701 | FUNCTION |      |    |        |   |                                                                                                                               |
| GO:0045765 | PROCESS  | 83   | 3  | 0.2910 | 1 | regulation of angiogenesis                                                                                                    |
| GO:0005795 | CELLULAR | 40   | 2  | 0.2912 | 1 | Golgi stack                                                                                                                   |
| GO:0006468 | PROCESS  | 586  | 18 | 0.2914 | 1 | protein amino acid phosphorylation                                                                                            |
| GO:0030799 | PROCESS  | 91   | 4  | 0.2944 | 1 | regulation of cyclic nucleotide metabolic process                                                                             |
| GO:0007266 | PROCESS  | 32   | 2  | 0.2950 | 1 | Rho protein signal transduction                                                                                               |
| GO:0031091 | CELLULAR | 53   | 2  | 0.2978 | 1 | platelet alpha granule                                                                                                        |
| GO:0001936 | PROCESS  | 29   | 2  | 0.2992 | 1 | regulation of endothelial cell proliferation                                                                                  |
| GO:0044248 | PROCESS  | 951  | 18 | 0.2994 | 1 | cellular catabolic process                                                                                                    |
| GO:0006487 | PROCESS  | 41   | 2  | 0.2996 | 1 | protein amino acid N-linked glycosylation                                                                                     |
| GO:0010594 | PROCESS  | 49   | 2  | 0.3008 | 1 | regulation of endothelial cell migration                                                                                      |
| GO:0022403 | PROCESS  | 365  | 7  | 0.3024 | 1 | cell cycle phase                                                                                                              |
| GO:0000271 | PROCESS  | 40   | 2  | 0.3036 | 1 | polysaccharide biosynthetic process                                                                                           |
| GO:0006936 | PROCESS  | 123  | 5  | 0.3048 | 1 | muscle contraction                                                                                                            |
| GO:0004857 | FUNCTION | 247  | 6  | 0.3054 | 1 | enzyme inhibitor activity                                                                                                     |
| GO:0007423 | PROCESS  | 159  | 5  | 0.3056 | 1 | sensory organ development                                                                                                     |
| GO:0008016 | PROCESS  | 60   | 3  | 0.3058 | 1 | regulation of heart contraction                                                                                               |
| GO:0030674 | FUNCTION | 84   | 3  | 0.3062 | 1 | protein binding, bridging                                                                                                     |
| GO:0006140 | PROCESS  | 94   | 4  | 0.3064 | 1 | regulation of nucleotide metabolic process                                                                                    |
| GO:0000278 | PROCESS  | 327  | 6  | 0.3066 | 1 | mitotic cell cycle                                                                                                            |
| GO:0008135 | FUNCTION | 88   | 2  | 0.3092 | 1 | translation factor activity, nucleic acid binding                                                                             |
| GO:0008643 | PROCESS  | 57   | 2  | 0.3098 | 1 | carbohydrate transport                                                                                                        |
| GO:0010467 | PROCESS  | 1095 | 18 | 0.3106 | 1 | gene expression                                                                                                               |
| GO:0030005 | PROCESS  | 163  | 5  | 0.3122 | 1 | cellular di-, tri-valent inorganic cation homeostasis                                                                         |

|            |          |      |    |        |   |                                                                                              |
|------------|----------|------|----|--------|---|----------------------------------------------------------------------------------------------|
| GO:0031301 | CELLULAR | 114  | 4  | 0.3130 | 1 | integral to organelle membrane                                                               |
| GO:0009892 | PROCESS  | 618  | 14 | 0.3148 | 1 | negative regulation of metabolic process                                                     |
| GO:0022857 | FUNCTION | 816  | 28 | 0.3150 | 1 | transmembrane transporter activity                                                           |
| GO:0015082 | FUNCTION | 31   | 2  | 0.3158 | 1 | di-, tri-valent inorganic cation transmembrane transporter activity                          |
| GO:0016772 | FUNCTION | 829  | 23 | 0.3172 | 1 | transferase activity, transferring phosphorus-containing groups                              |
| GO:0015031 | PROCESS  | 677  | 15 | 0.3176 | 1 | protein transport                                                                            |
| GO:0046930 | CELLULAR | 86   | 2  | 0.3190 | 1 | pore complex                                                                                 |
| GO:0035257 | FUNCTION | 69   | 2  | 0.3200 | 1 | nuclear hormone receptor binding                                                             |
| GO:0031325 | PROCESS  | 657  | 16 | 0.3212 | 1 | positive regulation of cellular metabolic process                                            |
| GO:0016651 | FUNCTION | 70   | 2  | 0.3218 | 1 | oxidoreductase activity, acting on NADH or NADPH                                             |
| GO:0006754 | PROCESS  | 78   | 3  | 0.3220 | 1 | ATP biosynthetic process                                                                     |
| GO:0050801 | PROCESS  | 301  | 9  | 0.3222 | 1 | ion homeostasis                                                                              |
| GO:0009259 | PROCESS  | 127  | 4  | 0.3228 | 1 | ribonucleotide metabolic process                                                             |
| GO:0003735 | FUNCTION | 146  | 2  | 0.3238 | 1 | structural constituent of ribosome                                                           |
| GO:0030528 | FUNCTION | 1358 | 28 | 0.3264 | 1 | transcription regulator activity                                                             |
| GO:0044421 | CELLULAR | 842  | 22 | 0.3274 | 1 | extracellular region part                                                                    |
| GO:0007584 | PROCESS  | 66   | 2  | 0.3274 | 1 | response to nutrient                                                                         |
| GO:0044237 | PROCESS  | 4582 | 85 | 0.3290 | 1 | cellular metabolic process                                                                   |
| GO:0019953 | PROCESS  | 342  | 7  | 0.3294 | 1 | sexual reproduction                                                                          |
| GO:0009615 | PROCESS  | 96   | 2  | 0.3312 | 1 | response to virus                                                                            |
| GO:0010629 | PROCESS  | 420  | 10 | 0.3328 | 1 | negative regulation of gene expression                                                       |
| GO:0055066 | PROCESS  | 173  | 5  | 0.3340 | 1 | di-, tri-valent inorganic cation homeostasis                                                 |
| GO:0051707 | PROCESS  | 216  | 4  | 0.3348 | 1 | response to other organism                                                                   |
| GO:0022890 | FUNCTION | 126  | 4  | 0.3352 | 1 | inorganic cation transmembrane transporter activity                                          |
| GO:0042592 | PROCESS  | 544  | 14 | 0.3356 | 1 | homeostatic process                                                                          |
| GO:0009991 | PROCESS  | 118  | 3  | 0.3356 | 1 | response to extracellular stimulus                                                           |
| GO:0042802 | FUNCTION | 517  | 14 | 0.3366 | 1 | identical protein binding                                                                    |
| GO:0007166 | PROCESS  | 1573 | 35 | 0.3372 | 1 | cell surface receptor linked signal transduction                                             |
| GO:0005070 | FUNCTION | 42   | 2  | 0.3382 | 1 | SH3/SH2 adaptor activity                                                                     |
| GO:0009057 | PROCESS  | 1131 | 22 | 0.3388 | 1 | macromolecule catabolic process                                                              |
| GO:0004620 | FUNCTION | 80   | 3  | 0.3394 | 1 | phospholipase activity                                                                       |
| GO:0051093 | PROCESS  | 445  | 11 | 0.3400 | 1 | negative regulation of developmental process                                                 |
| GO:0004653 | FUNCTION | 19   | 2  | 0.3404 | 1 | polypeptide N-acetylgalactosaminyltransferase activity                                       |
| GO:0009124 | PROCESS  | 45   | 2  | 0.3412 | 1 | nucleoside monophosphate biosynthetic process                                                |
| GO:0046982 | FUNCTION | 139  | 4  | 0.3420 | 1 | protein heterodimerization activity                                                          |
| GO:0043235 | CELLULAR | 100  | 4  | 0.3424 | 1 | receptor complex                                                                             |
| GO:0007015 | PROCESS  | 54   | 2  | 0.3430 | 1 | actin filament organization                                                                  |
| GO:0005773 | CELLULAR | 222  | 5  | 0.3432 | 1 | vacuole                                                                                      |
| GO:0051129 | PROCESS  | 113  | 3  | 0.3444 | 1 | negative regulation of cellular component organization                                       |
| GO:0032101 | PROCESS  | 114  | 4  | 0.3456 | 1 | regulation of response to external stimulus                                                  |
| GO:0009206 | PROCESS  | 87   | 3  | 0.3460 | 1 | purine ribonucleoside triphosphate biosynthetic process                                      |
| GO:0009145 | PROCESS  | 87   | 3  | 0.3460 | 1 | purine nucleoside triphosphate biosynthetic process                                          |
| GO:0007588 | PROCESS  | 46   | 2  | 0.3468 | 1 | excretion                                                                                    |
| GO:0005741 | CELLULAR | 79   | 2  | 0.3472 | 1 | mitochondrial outer membrane                                                                 |
| GO:0007606 | PROCESS  | 402  | 5  | 0.3474 | 1 | sensory perception of chemical stimulus                                                      |
| GO:0008219 | PROCESS  | 548  | 13 | 0.3476 | 1 | cell death                                                                                   |
| GO:0019992 | FUNCTION | 63   | 4  | 0.3480 | 1 | diacylglycerol binding                                                                       |
| GO:0016042 | PROCESS  | 155  | 4  | 0.3486 | 1 | lipid catabolic process                                                                      |
| GO:0045934 | PROCESS  | 421  | 10 | 0.3488 | 1 | negative regulation of nucleobase, nucleoside, nucleotide and nucleic acid metabolic process |
| GO:0009201 | PROCESS  | 88   | 3  | 0.3488 | 1 | ribonucleoside triphosphate biosynthetic process                                             |
| GO:0009142 | PROCESS  | 88   | 3  | 0.3488 | 1 | nucleoside triphosphate biosynthetic process                                                 |
| GO:0002684 | PROCESS  | 164  | 4  | 0.3494 | 1 | positive regulation of immune system process                                                 |
| GO:0007507 | PROCESS  | 158  | 5  | 0.3504 | 1 | heart development                                                                            |
| GO:0009187 | PROCESS  | 31   | 2  | 0.3508 | 1 | cyclic nucleotide metabolic process                                                          |
| GO:0051172 | PROCESS  | 422  | 10 | 0.3508 | 1 | negative regulation of nitrogen compound metabolic process                                   |
| GO:0016051 | PROCESS  | 86   | 3  | 0.3522 | 1 | carbohydrate biosynthetic process                                                            |
| GO:0016563 | FUNCTION | 340  | 8  | 0.3540 | 1 | transcription activator activity                                                             |
| GO:0051427 | FUNCTION | 75   | 2  | 0.3542 | 1 | hormone receptor binding                                                                     |
| GO:0016265 | PROCESS  | 552  | 13 | 0.3544 | 1 | death                                                                                        |
| GO:0046578 | PROCESS  | 185  | 7  | 0.3548 | 1 | regulation of Ras protein signal transduction                                                |
| GO:0050730 | PROCESS  | 56   | 2  | 0.3556 | 1 | regulation of peptidyl-tyrosine phosphorylation                                              |
| GO:0048729 | PROCESS  | 134  | 4  | 0.3558 | 1 | tissue morphogenesis                                                                         |
| GO:0009611 | PROCESS  | 399  | 9  | 0.3560 | 1 | response to wounding                                                                         |
| GO:0042803 | FUNCTION | 262  | 8  | 0.3564 | 1 | protein homodimerization activity                                                            |
| GO:0030203 | PROCESS  | 47   | 2  | 0.3582 | 1 | glycosaminoglycan metabolic process                                                          |
| GO:0031402 | FUNCTION | 113  | 5  | 0.3584 | 1 | sodium ion binding                                                                           |
| GO:0034960 | PROCESS  | 3182 | 59 | 0.3592 | 1 | cellular biopolymer metabolic process                                                        |
| GO:0030165 | FUNCTION | 31   | 2  | 0.3592 | 1 | PDZ domain binding                                                                           |
| GO:0015078 | FUNCTION | 77   | 2  | 0.3602 | 1 | hydrogen ion transmembrane transporter activity                                              |



|            |          |      |    |        |   |                                                                                              |
|------------|----------|------|----|--------|---|----------------------------------------------------------------------------------------------|
| GO:0000775 | CELLULAR | 106  | 2  | 0.3626 | 1 | chromosome, centromeric region                                                               |
| GO:0045859 | PROCESS  | 277  | 7  | 0.3636 | 1 | regulation of protein kinase activity                                                        |
| GO:0005882 | CELLULAR | 159  | 2  | 0.3642 | 1 | intermediate filament                                                                        |
| GO:0048699 | PROCESS  | 366  | 13 | 0.3648 | 1 | generation of neurons                                                                        |
| GO:0005615 | CELLULAR | 585  | 13 | 0.3662 | 1 | extracellular space                                                                          |
| GO:0017076 | FUNCTION | 1758 | 42 | 0.3664 | 1 | purine nucleotide binding                                                                    |
| GO:0005089 | FUNCTION | 66   | 4  | 0.3672 | 1 | Rho guanyl-nucleotide exchange factor activity                                               |
| GO:0006644 | PROCESS  | 164  | 4  | 0.3674 | 1 | phospholipid metabolic process                                                               |
|            |          | 48   | 2  | 0.3682 | 1 | regulation of G-protein coupled receptor protein signaling pathway                           |
| GO:0008277 | PROCESS  |      |    |        |   |                                                                                              |
| GO:0016052 | PROCESS  | 92   | 2  | 0.3682 | 1 | carbohydrate catabolic process                                                               |
| GO:0045111 | CELLULAR | 160  | 2  | 0.3682 | 1 | intermediate filament cytoskeleton                                                           |
| GO:0045595 | PROCESS  | 352  | 10 | 0.3696 | 1 | regulation of cell differentiation                                                           |
| GO:0031406 | FUNCTION | 107  | 3  | 0.3698 | 1 | carboxylic acid binding                                                                      |
| GO:0043549 | PROCESS  | 282  | 7  | 0.3700 | 1 | regulation of kinase activity                                                                |
| GO:0031175 | PROCESS  | 154  | 8  | 0.3700 | 1 | neuron projection development                                                                |
| GO:0048812 | PROCESS  | 130  | 7  | 0.3718 | 1 | neuron projection morphogenesis                                                              |
| GO:0005694 | CELLULAR | 386  | 6  | 0.3718 | 1 | chromosome                                                                                   |
| GO:0032270 | PROCESS  | 158  | 4  | 0.3734 | 1 | positive regulation of cellular protein metabolic process                                    |
| GO:0048167 | PROCESS  | 29   | 2  | 0.3736 | 1 | regulation of synaptic plasticity                                                            |
| GO:0016874 | FUNCTION | 355  | 8  | 0.3750 | 1 | ligase activity                                                                              |
| GO:0044422 | CELLULAR | 3701 | 65 | 0.3756 | 1 | organelle part                                                                               |
| GO:0000041 | PROCESS  | 63   | 2  | 0.3756 | 1 | transition metal ion transport                                                               |
| GO:0008757 | FUNCTION | 79   | 2  | 0.3762 | 1 | S-adenosylmethionine-dependent methyltransferase activity                                    |
|            |          | 484  | 12 | 0.3764 | 1 | positive regulation of nucleobase, nucleoside, nucleotide and nucleic acid metabolic process |
| GO:0045935 | PROCESS  |      |    |        |   |                                                                                              |
| GO:0044432 | CELLULAR | 303  | 7  | 0.3782 | 1 | endoplasmic reticulum part                                                                   |
| GO:0034622 | PROCESS  | 265  | 4  | 0.3804 | 1 | cellular macromolecular complex assembly                                                     |
| GO:0005829 | CELLULAR | 1072 | 21 | 0.3808 | 1 | cytosol                                                                                      |
| GO:0007275 | PROCESS  | 2320 | 59 | 0.3812 | 1 | multicellular organismal development                                                         |
| GO:0022891 | FUNCTION | 749  | 25 | 0.3812 | 1 | substrate-specific transmembrane transporter activity                                        |
| GO:0005604 | CELLULAR | 59   | 3  | 0.3826 | 1 | basement membrane                                                                            |
|            |          | 1542 | 27 | 0.3836 | 1 | nucleobase, nucleoside, nucleotide and nucleic acid metabolic process                        |
| GO:0006139 | PROCESS  |      |    |        |   |                                                                                              |
| GO:0006913 | PROCESS  | 130  | 3  | 0.3838 | 1 | nucleocytoplasmic transport                                                                  |
| GO:0048667 | PROCESS  | 132  | 7  | 0.3840 | 1 | cell morphogenesis involved in neuron differentiation                                        |
| GO:0019637 | PROCESS  | 170  | 4  | 0.3846 | 1 | organophosphate metabolic process                                                            |
| GO:0006486 | PROCESS  | 119  | 4  | 0.3852 | 1 | protein amino acid glycosylation                                                             |
| GO:0043413 | PROCESS  | 119  | 4  | 0.3852 | 1 | biopolymer glycosylation                                                                     |
| GO:0070085 | PROCESS  | 119  | 4  | 0.3852 | 1 | glycosylation                                                                                |
| GO:0032386 | PROCESS  | 60   | 2  | 0.3868 | 1 | regulation of intracellular transport                                                        |
| GO:0044428 | CELLULAR | 1600 | 26 | 0.3872 | 1 | nuclear part                                                                                 |
| GO:0046034 | PROCESS  | 89   | 3  | 0.3872 | 1 | ATP metabolic process                                                                        |
| GO:0009887 | PROCESS  | 522  | 14 | 0.3880 | 1 | organ morphogenesis                                                                          |
| GO:0034962 | PROCESS  | 635  | 11 | 0.3880 | 1 | cellular biopolymer catabolic process                                                        |
| GO:0051169 | PROCESS  | 132  | 3  | 0.3886 | 1 | nuclear transport                                                                            |
| GO:0050660 | FUNCTION | 64   | 2  | 0.3896 | 1 | FAD binding                                                                                  |
| GO:0000279 | PROCESS  | 298  | 5  | 0.3922 | 1 | M phase                                                                                      |
| GO:0006874 | PROCESS  | 127  | 4  | 0.3922 | 1 | cellular calcium ion homeostasis                                                             |
| GO:0050769 | PROCESS  | 39   | 2  | 0.3922 | 1 | positive regulation of neurogenesis                                                          |
| GO:0006006 | PROCESS  | 96   | 2  | 0.3942 | 1 | glucose metabolic process                                                                    |
| GO:0008217 | PROCESS  | 69   | 2  | 0.3950 | 1 | regulation of blood pressure                                                                 |
| GO:0006694 | PROCESS  | 71   | 2  | 0.3950 | 1 | steroid biosynthetic process                                                                 |
| GO:0009101 | PROCESS  | 144  | 5  | 0.3966 | 1 | glycoprotein biosynthetic process                                                            |
| GO:0007218 | PROCESS  | 80   | 3  | 0.3968 | 1 | neuropeptide signaling pathway                                                               |
| GO:0005083 | FUNCTION | 233  | 9  | 0.3970 | 1 | small GTPase regulator activity                                                              |
| GO:0000187 | PROCESS  | 67   | 2  | 0.3970 | 1 | activation of MAPK activity                                                                  |
| GO:0051247 | PROCESS  | 163  | 4  | 0.3974 | 1 | positive regulation of protein metabolic process                                             |
| GO:0048858 | PROCESS  | 137  | 7  | 0.3978 | 1 | cell projection morphogenesis                                                                |
| GO:0032555 | FUNCTION | 1684 | 40 | 0.4010 | 1 | purine ribonucleotide binding                                                                |
| GO:0032553 | FUNCTION | 1684 | 40 | 0.4010 | 1 | ribonucleotide binding                                                                       |
| GO:0002694 | PROCESS  | 119  | 3  | 0.4014 | 1 | regulation of leukocyte activation                                                           |
| GO:0055074 | PROCESS  | 130  | 4  | 0.4014 | 1 | calcium ion homeostasis                                                                      |
| GO:0051173 | PROCESS  | 495  | 12 | 0.4026 | 1 | positive regulation of nitrogen compound metabolic process                                   |
| GO:0030326 | PROCESS  | 54   | 2  | 0.4032 | 1 | embryonic limb morphogenesis                                                                 |
| GO:0035113 | PROCESS  | 54   | 2  | 0.4032 | 1 | embryonic appendage morphogenesis                                                            |
| GO:0005874 | CELLULAR | 238  | 6  | 0.4040 | 1 | microtubule                                                                                  |
| GO:0055080 | PROCESS  | 210  | 6  | 0.4042 | 1 | cation homeostasis                                                                           |
| GO:0035295 | PROCESS  | 130  | 4  | 0.4044 | 1 | tube development                                                                             |
| GO:0003012 | PROCESS  | 153  | 5  | 0.4054 | 1 | muscle system process                                                                        |
| GO:0007215 | PROCESS  | 22   | 2  | 0.4068 | 1 | glutamate signaling pathway                                                                  |

|            |          |      |    |        |   |                                                                      |
|------------|----------|------|----|--------|---|----------------------------------------------------------------------|
| GO:0016298 | FUNCTION | 95   | 3  | 0.4076 | 1 | lipase activity                                                      |
| GO:0045182 | FUNCTION | 106  | 2  | 0.4106 | 1 | translation regulator activity                                       |
| GO:0044242 | PROCESS  | 80   | 2  | 0.4106 | 1 | cellular lipid catabolic process                                     |
| GO:0051338 | PROCESS  | 294  | 7  | 0.4110 | 1 | regulation of transferase activity                                   |
| GO:0007417 | PROCESS  | 293  | 11 | 0.4128 | 1 | central nervous system development                                   |
| GO:0006814 | PROCESS  | 120  | 5  | 0.4138 | 1 | sodium ion transport                                                 |
| GO:0010557 | PROCESS  | 513  | 12 | 0.4142 | 1 | positive regulation of macromolecule biosynthetic process            |
| GO:0043232 | CELLULAR | 2233 | 44 | 0.4166 | 1 | intracellular non-membrane-bounded organelle                         |
| GO:0043228 | CELLULAR | 2233 | 44 | 0.4166 | 1 | non-membrane-bounded organelle                                       |
| GO:0048518 | PROCESS  | 1530 | 33 | 0.4182 | 1 | positive regulation of biological process                            |
| GO:0006022 | PROCESS  | 57   | 2  | 0.4186 | 1 | aminoglycan metabolic process                                        |
| GO:0005635 | CELLULAR | 176  | 4  | 0.4192 | 1 | nuclear envelope                                                     |
| GO:0009056 | PROCESS  | 1485 | 28 | 0.4196 | 1 | catabolic process                                                    |
| GO:0009205 | PROCESS  | 100  | 3  | 0.4198 | 1 | purine ribonucleoside triphosphate metabolic process                 |
| GO:0032990 | PROCESS  | 144  | 7  | 0.4198 | 1 | cell part morphogenesis                                              |
| GO:0009968 | PROCESS  | 196  | 5  | 0.4202 | 1 | negative regulation of signal transduction                           |
| GO:0015631 | FUNCTION | 72   | 2  | 0.4202 | 1 | tubulin binding                                                      |
| GO:0015672 | PROCESS  | 291  | 10 | 0.4206 | 1 | monovalent inorganic cation transport                                |
| GO:0051726 | PROCESS  | 270  | 5  | 0.4210 | 1 | regulation of cell cycle                                             |
| GO:0032502 | PROCESS  | 2536 | 63 | 0.4216 | 1 | developmental process                                                |
| GO:0022008 | PROCESS  | 391  | 13 | 0.4224 | 1 | neurogenesis                                                         |
| GO:0009199 | PROCESS  | 101  | 3  | 0.4226 | 1 | ribonucleoside triphosphate metabolic process                        |
| GO:0019941 | PROCESS  | 517  | 9  | 0.4230 | 1 | modification-dependent protein catabolic process                     |
| GO:0043632 | PROCESS  | 517  | 9  | 0.4230 | 1 | modification-dependent macromolecule catabolic process               |
| GO:0048869 | PROCESS  | 1285 | 33 | 0.4238 | 1 | cellular developmental process                                       |
| GO:0006898 | PROCESS  | 44   | 2  | 0.4238 | 1 | receptor-mediated endocytosis                                        |
| GO:0009144 | PROCESS  | 101  | 3  | 0.4240 | 1 | purine nucleoside triphosphate metabolic process                     |
| GO:0045761 | PROCESS  | 79   | 3  | 0.4248 | 1 | regulation of adenylate cyclase activity                             |
| GO:0009893 | PROCESS  | 680  | 16 | 0.4264 | 1 | positive regulation of metabolic process                             |
| GO:0009653 | PROCESS  | 843  | 23 | 0.4268 | 1 | anatomical structure morphogenesis                                   |
| GO:0048747 | PROCESS  | 47   | 2  | 0.4268 | 1 | muscle fiber development                                             |
| GO:0051603 | PROCESS  | 521  | 9  | 0.4272 | 1 | proteolysis involved in cellular protein catabolic process           |
| GO:0051329 | PROCESS  | 81   | 2  | 0.4276 | 1 | interphase of mitotic cell cycle                                     |
| GO:0044257 | PROCESS  | 523  | 9  | 0.4292 | 1 | cellular protein catabolic process                                   |
| GO:0006916 | PROCESS  | 172  | 4  | 0.4302 | 1 | anti-apoptosis                                                       |
| GO:0016043 | PROCESS  | 1989 | 45 | 0.4326 | 1 | cellular component organization                                      |
| GO:0030154 | PROCESS  | 1244 | 32 | 0.4332 | 1 | cell differentiation                                                 |
| GO:0051716 | PROCESS  | 603  | 12 | 0.4338 | 1 | cellular response to stimulus                                        |
| GO:0030003 | PROCESS  | 183  | 5  | 0.4350 | 1 | cellular cation homeostasis                                          |
| GO:0042734 | CELLULAR | 16   | 2  | 0.4354 | 1 | presynaptic membrane                                                 |
| GO:0005783 | CELLULAR | 866  | 18 | 0.4360 | 1 | endoplasmic reticulum                                                |
| GO:0031279 | PROCESS  | 81   | 3  | 0.4368 | 1 | regulation of cyclase activity                                       |
| GO:0031982 | CELLULAR | 553  | 13 | 0.4378 | 1 | vesicle                                                              |
| GO:0030695 | FUNCTION | 362  | 13 | 0.4384 | 1 | GTPase regulator activity                                            |
| GO:0051641 | PROCESS  | 761  | 17 | 0.4400 | 1 | cellular localization                                                |
| GO:0008104 | PROCESS  | 771  | 16 | 0.4400 | 1 | protein localization                                                 |
| GO:0080134 | PROCESS  | 194  | 4  | 0.4404 | 1 | regulation of response to stress                                     |
| GO:0051339 | PROCESS  | 83   | 3  | 0.4436 | 1 | regulation of lyase activity                                         |
| GO:0000122 | PROCESS  | 205  | 5  | 0.4436 | 1 | negative regulation of transcription from RNA polymerase II promoter |
| GO:0005681 | CELLULAR | 123  | 2  | 0.4438 | 1 | spliceosomal complex                                                 |
| GO:0016604 | CELLULAR | 150  | 3  | 0.4448 | 1 | nuclear body                                                         |
| GO:0016607 | CELLULAR | 95   | 2  | 0.4452 | 1 | nuclear speck                                                        |
| GO:0030425 | CELLULAR | 77   | 3  | 0.4464 | 1 | dendrite                                                             |
| GO:0060589 | FUNCTION | 371  | 13 | 0.4482 | 1 | nucleoside-triphosphatase regulator activity                         |
| GO:0009141 | PROCESS  | 107  | 3  | 0.4492 | 1 | nucleoside triphosphate metabolic process                            |
| GO:0008168 | FUNCTION | 159  | 3  | 0.4496 | 1 | methyltransferase activity                                           |
| GO:0015075 | FUNCTION | 647  | 22 | 0.4504 | 1 | ion transmembrane transporter activity                               |
| GO:0007586 | PROCESS  | 78   | 2  | 0.4506 | 1 | digestion                                                            |
| GO:0010604 | PROCESS  | 646  | 15 | 0.4516 | 1 | positive regulation of macromolecule metabolic process               |
| GO:0007612 | PROCESS  | 35   | 2  | 0.4516 | 1 | learning                                                             |
| GO:0008066 | FUNCTION | 29   | 3  | 0.4516 | 1 | glutamate receptor activity                                          |
| GO:0004888 | FUNCTION | 1113 | 26 | 0.4518 | 1 | transmembrane receptor activity                                      |
| GO:0051325 | PROCESS  | 84   | 2  | 0.4520 | 1 | interphase                                                           |
| GO:0043285 | PROCESS  | 1075 | 20 | 0.4522 | 1 | biopolymer catabolic process                                         |
| GO:0050863 | PROCESS  | 84   | 2  | 0.4524 | 1 | regulation of T cell activation                                      |
| GO:0008360 | PROCESS  | 48   | 2  | 0.4532 | 1 | regulation of cell shape                                             |
| GO:0016741 | FUNCTION | 161  | 3  | 0.4542 | 1 | transferase activity, transferring one-carbon groups                 |
| GO:0031968 | CELLULAR | 91   | 2  | 0.4574 | 1 | organelle outer membrane                                             |
| GO:0016192 | PROCESS  | 483  | 12 | 0.4582 | 1 | vesicle-mediated transport                                           |
| GO:0007005 | PROCESS  | 104  | 2  | 0.4596 | 1 | mitochondrion organization                                           |

|            |          |      |    |        |   |                                                                                       |
|------------|----------|------|----|--------|---|---------------------------------------------------------------------------------------|
| GO:0016782 | FUNCTION | 54   | 2  | 0.4598 | 1 | transferase activity, transferring sulfur-containing groups                           |
| GO:0048468 | PROCESS  | 586  | 17 | 0.4624 | 1 | cell development                                                                      |
| GO:0006399 | PROCESS  | 114  | 2  | 0.4634 | 1 | tRNA metabolic process                                                                |
| GO:0005088 | FUNCTION | 78   | 4  | 0.4634 | 1 | Ras guanyl-nucleotide exchange factor activity                                        |
| GO:0019219 | PROCESS  | 2511 | 44 | 0.4638 | 1 | regulation of nucleobase, nucleoside, nucleotide and nucleic acid metabolic process   |
| GO:0010564 | PROCESS  | 90   | 2  | 0.4646 | 1 | regulation of cell cycle process                                                      |
| GO:0016529 | CELLULAR | 32   | 2  | 0.4650 | 1 | sarcoplasmic reticulum                                                                |
| GO:0007243 | PROCESS  | 292  | 7  | 0.4652 | 1 | protein kinase cascade                                                                |
| GO:0000228 | CELLULAR | 114  | 2  | 0.4656 | 1 | nuclear chromosome                                                                    |
| GO:0005198 | FUNCTION | 554  | 11 | 0.4666 | 1 | structural molecule activity                                                          |
| GO:0033554 | PROCESS  | 442  | 8  | 0.4678 | 1 | cellular response to stress                                                           |
| GO:0032989 | PROCESS  | 245  | 9  | 0.4698 | 1 | cellular component morphogenesis                                                      |
| GO:0016568 | PROCESS  | 246  | 5  | 0.4704 | 1 | chromatin modification                                                                |
| GO:0010720 | PROCESS  | 48   | 2  | 0.4706 | 1 | positive regulation of cell development                                               |
| GO:0019752 | PROCESS  | 496  | 10 | 0.4716 | 1 | carboxylic acid metabolic process                                                     |
| GO:0043436 | PROCESS  | 496  | 10 | 0.4716 | 1 | oxoacid metabolic process                                                             |
| GO:0007608 | PROCESS  | 360  | 4  | 0.4718 | 1 | sensory perception of smell                                                           |
| GO:0005840 | CELLULAR | 182  | 2  | 0.4720 | 1 | ribosome                                                                              |
| GO:0030902 | PROCESS  | 41   | 2  | 0.4722 | 1 | hindbrain development                                                                 |
| GO:0016564 | FUNCTION | 262  | 6  | 0.4726 | 1 | transcription repressor activity                                                      |
| GO:0006082 | PROCESS  | 499  | 10 | 0.4748 | 1 | organic acid metabolic process                                                        |
| GO:0019932 | PROCESS  | 199  | 5  | 0.4760 | 1 | second-messenger-mediated signaling                                                   |
| GO:0004984 | FUNCTION | 343  | 3  | 0.4766 | 1 | olfactory receptor activity                                                           |
| GO:0016528 | CELLULAR | 33   | 2  | 0.4778 | 1 | sarcoplasm                                                                            |
| GO:0010605 | PROCESS  | 588  | 12 | 0.4786 | 1 | negative regulation of macromolecule metabolic process                                |
| GO:0008076 | CELLULAR | 80   | 3  | 0.4790 | 1 | voltage-gated potassium channel complex                                               |
| GO:0034705 | CELLULAR | 80   | 3  | 0.4790 | 1 | potassium channel complex                                                             |
| GO:0031326 | PROCESS  | 2636 | 46 | 0.4792 | 1 | regulation of cellular biosynthetic process                                           |
| GO:0030817 | PROCESS  | 83   | 3  | 0.4808 | 1 | regulation of cAMP biosynthetic process                                               |
| GO:0000904 | PROCESS  | 157  | 7  | 0.4808 | 1 | cell morphogenesis involved in differentiation                                        |
| GO:0015662 | FUNCTION | 44   | 2  | 0.4810 | 1 | ATPase activity, coupled to transmembrane movement of ions, phosphorylative mechanism |
| GO:0034704 | CELLULAR | 26   | 2  | 0.4818 | 1 | calcium channel complex                                                               |
| GO:0019867 | CELLULAR | 94   | 2  | 0.4822 | 1 | outer membrane                                                                        |
| GO:0031981 | CELLULAR | 1293 | 20 | 0.4828 | 1 | nuclear lumen                                                                         |
| GO:0005506 | FUNCTION | 277  | 6  | 0.4848 | 1 | iron ion binding                                                                      |
| GO:0003001 | PROCESS  | 54   | 2  | 0.4860 | 1 | generation of a signal involved in cell-cell signaling                                |
| GO:0007409 | PROCESS  | 122  | 6  | 0.4860 | 1 | axonogenesis                                                                          |
| GO:0051171 | PROCESS  | 2528 | 44 | 0.4868 | 1 | regulation of nitrogen compound metabolic process                                     |
| GO:0009889 | PROCESS  | 2644 | 46 | 0.4870 | 1 | regulation of biosynthetic process                                                    |
| GO:0005496 | FUNCTION | 112  | 3  | 0.4874 | 1 | steroid binding                                                                       |
| GO:0006875 | PROCESS  | 136  | 4  | 0.4892 | 1 | cellular metal ion homeostasis                                                        |
| GO:0006937 | PROCESS  | 54   | 2  | 0.4906 | 1 | regulation of muscle contraction                                                      |
| GO:0003682 | FUNCTION | 104  | 2  | 0.4924 | 1 | chromatin binding                                                                     |
| GO:0006665 | PROCESS  | 67   | 2  | 0.4932 | 1 | sphingolipid metabolic process                                                        |
| GO:0045941 | PROCESS  | 440  | 10 | 0.4938 | 1 | positive regulation of transcription                                                  |
| GO:0042180 | PROCESS  | 506  | 10 | 0.4944 | 1 | cellular ketone metabolic process                                                     |
| GO:0007517 | PROCESS  | 175  | 5  | 0.4968 | 1 | muscle organ development                                                              |
| GO:0006873 | PROCESS  | 274  | 7  | 0.4970 | 1 | cellular ion homeostasis                                                              |
| GO:0034703 | CELLULAR | 123  | 5  | 0.4974 | 1 | cation channel complex                                                                |
| GO:0004713 | FUNCTION | 147  | 5  | 0.4982 | 1 | protein tyrosine kinase activity                                                      |
| GO:0003713 | FUNCTION | 195  | 4  | 0.4992 | 1 | transcription coactivator activity                                                    |
| GO:0048583 | PROCESS  | 332  | 7  | 0.5014 | 1 | regulation of response to stimulus                                                    |
| GO:0019904 | FUNCTION | 253  | 7  | 0.5020 | 1 | protein domain specific binding                                                       |
| GO:0007167 | PROCESS  | 283  | 9  | 0.5024 | 1 | enzyme linked receptor protein signaling pathway                                      |
| GO:0030234 | FUNCTION | 755  | 20 | 0.5026 | 1 | enzyme regulator activity                                                             |
| GO:0008285 | PROCESS  | 289  | 7  | 0.5034 | 1 | negative regulation of cell proliferation                                             |
| GO:0003676 | FUNCTION | 2951 | 46 | 0.5036 | 1 | nucleic acid binding                                                                  |
| GO:0005925 | CELLULAR | 89   | 3  | 0.5038 | 1 | focal adhesion                                                                        |
| GO:0043406 | PROCESS  | 82   | 2  | 0.5040 | 1 | positive regulation of MAP kinase activity                                            |
| GO:0051276 | PROCESS  | 422  | 7  | 0.5048 | 1 | chromosome organization                                                               |
| GO:0043176 | FUNCTION | 80   | 2  | 0.5050 | 1 | amine binding                                                                         |
| GO:0008236 | FUNCTION | 175  | 4  | 0.5052 | 1 | serine-type peptidase activity                                                        |
| GO:0050776 | PROCESS  | 151  | 3  | 0.5066 | 1 | regulation of immune response                                                         |
| GO:0031420 | FUNCTION | 222  | 8  | 0.5066 | 1 | alkali metal ion binding                                                              |
| GO:0030814 | PROCESS  | 86   | 3  | 0.5088 | 1 | regulation of cAMP metabolic process                                                  |
| GO:0006812 | PROCESS  | 494  | 16 | 0.5102 | 1 | cation transport                                                                      |
| GO:0048870 | PROCESS  | 223  | 7  | 0.5106 | 1 | cell motility                                                                         |
| GO:0017171 | FUNCTION | 177  | 4  | 0.5114 | 1 | serine hydrolase activity                                                             |
| GO:0009617 | PROCESS  | 124  | 2  | 0.5116 | 1 | response to bacterium                                                                 |

|            |          |      |    |        |   |                                                                |
|------------|----------|------|----|--------|---|----------------------------------------------------------------|
| GO:0016323 | CELLULAR | 150  | 5  | 0.5118 | 1 | basolateral plasma membrane                                    |
| GO:0030529 | CELLULAR | 442  | 5  | 0.5130 | 1 | ribonucleoprotein complex                                      |
| GO:0001505 | PROCESS  | 52   | 2  | 0.5132 | 1 | regulation of neurotransmitter levels                          |
| GO:0031967 | CELLULAR | 519  | 8  | 0.5138 | 1 | organelle envelope                                             |
| GO:0055082 | PROCESS  | 280  | 7  | 0.5140 | 1 | cellular chemical homeostasis                                  |
| GO:0007420 | PROCESS  | 184  | 6  | 0.5154 | 1 | brain development                                              |
| GO:0051249 | PROCESS  | 102  | 2  | 0.5164 | 1 | regulation of lymphocyte activation                            |
| GO:0048646 | PROCESS  | 245  | 7  | 0.5166 | 1 | anatomical structure formation involved in morphogenesis       |
| GO:0031975 | CELLULAR | 521  | 8  | 0.5178 | 1 | envelope                                                       |
| GO:0000166 | FUNCTION | 2036 | 45 | 0.5182 | 1 | nucleotide binding                                             |
| GO:0035108 | PROCESS  | 63   | 2  | 0.5200 | 1 | limb morphogenesis                                             |
| GO:0035107 | PROCESS  | 63   | 2  | 0.5200 | 1 | appendage morphogenesis                                        |
| GO:0055065 | PROCESS  | 143  | 4  | 0.5216 | 1 | metal ion homeostasis                                          |
| GO:0006886 | PROCESS  | 323  | 6  | 0.5224 | 1 | intracellular protein transport                                |
| GO:0034621 | PROCESS  | 298  | 4  | 0.5226 | 1 | cellular macromolecular complex subunit organization           |
| GO:0048584 | PROCESS  | 167  | 4  | 0.5228 | 1 | positive regulation of response to stimulus                    |
| GO:0031347 | PROCESS  | 93   | 2  | 0.5250 | 1 | regulation of defense response                                 |
| GO:0005887 | CELLULAR | 1096 | 31 | 0.5256 | 1 | integral to plasma membrane                                    |
| GO:0031667 | PROCESS  | 102  | 2  | 0.5290 | 1 | response to nutrient levels                                    |
| GO:0031410 | CELLULAR | 544  | 12 | 0.5300 | 1 | cytoplasmic vesicle                                            |
| GO:0009725 | PROCESS  | 185  | 4  | 0.5308 | 1 | response to hormone stimulus                                   |
| GO:0045449 | PROCESS  | 2335 | 39 | 0.5310 | 1 | regulation of transcription                                    |
| GO:0005886 | CELLULAR | 3366 | 87 | 0.5312 | 1 | plasma membrane                                                |
| GO:0006643 | PROCESS  | 73   | 2  | 0.5330 | 1 | membrane lipid metabolic process                               |
| GO:0031225 | CELLULAR | 209  | 7  | 0.5336 | 1 | anchored to membrane                                           |
| GO:0048666 | PROCESS  | 210  | 8  | 0.5360 | 1 | neuron development                                             |
| GO:0006508 | PROCESS  | 927  | 17 | 0.5362 | 1 | proteolysis                                                    |
| GO:0009894 | PROCESS  | 92   | 2  | 0.5372 | 1 | regulation of catabolic process                                |
| GO:0010556 | PROCESS  | 2537 | 42 | 0.5374 | 1 | regulation of macromolecule biosynthetic process               |
| GO:0015077 | FUNCTION | 88   | 2  | 0.5378 | 1 | monovalent inorganic cation transmembrane transporter activity |
| GO:0060173 | PROCESS  | 65   | 2  | 0.5392 | 1 | limb development                                               |
| GO:0048736 | PROCESS  | 65   | 2  | 0.5392 | 1 | appendage development                                          |
| GO:0044427 | CELLULAR | 314  | 4  | 0.5416 | 1 | chromosomal part                                               |
| GO:0030198 | PROCESS  | 69   | 2  | 0.5418 | 1 | extracellular matrix organization                              |
| GO:0044446 | CELLULAR | 3679 | 61 | 0.5424 | 1 | intracellular organelle part                                   |
| GO:0030163 | PROCESS  | 937  | 17 | 0.5428 | 1 | protein catabolic process                                      |
| GO:0005654 | CELLULAR | 777  | 12 | 0.5428 | 1 | nucleoplasm                                                    |
| GO:0008022 | FUNCTION | 114  | 3  | 0.5430 | 1 | protein C-terminus binding                                     |
| GO:0042625 | FUNCTION | 61   | 2  | 0.5434 | 1 | ATPase activity, coupled to transmembrane movement of ions     |
| GO:0046903 | PROCESS  | 216  | 6  | 0.5444 | 1 | secretion                                                      |
| GO:0048522 | PROCESS  | 1405 | 29 | 0.5470 | 1 | positive regulation of cellular process                        |
| GO:0005924 | CELLULAR | 93   | 3  | 0.5476 | 1 | cell-substrate adherens junction                               |
| GO:0044057 | PROCESS  | 190  | 6  | 0.5520 | 1 | regulation of system process                                   |
| GO:0017038 | PROCESS  | 108  | 2  | 0.5526 | 1 | protein import                                                 |
| GO:0043066 | PROCESS  | 271  | 5  | 0.5532 | 1 | negative regulation of apoptosis                               |
| GO:0000902 | PROCESS  | 217  | 8  | 0.5542 | 1 | cell morphogenesis                                             |
| GO:0003707 | FUNCTION | 47   | 2  | 0.5552 | 1 | steroid hormone receptor activity                              |
| GO:0016829 | FUNCTION | 139  | 3  | 0.5554 | 1 | lyase activity                                                 |
| GO:0043566 | FUNCTION | 104  | 2  | 0.5576 | 1 | structure-specific DNA binding                                 |
| GO:0051241 | PROCESS  | 100  | 2  | 0.5582 | 1 | negative regulation of multicellular organismal process        |
| GO:0045211 | CELLULAR | 118  | 6  | 0.5584 | 1 | postsynaptic membrane                                          |
| GO:0010033 | PROCESS  | 416  | 9  | 0.5624 | 1 | response to organic substance                                  |
| GO:0043062 | PROCESS  | 104  | 3  | 0.5628 | 1 | extracellular structure organization                           |
| GO:0016567 | PROCESS  | 96   | 2  | 0.5630 | 1 | protein ubiquitination                                         |
| GO:0005739 | CELLULAR | 948  | 14 | 0.5636 | 1 | mitochondrion                                                  |
| GO:0042221 | PROCESS  | 866  | 18 | 0.5640 | 1 | response to chemical stimulus                                  |
| GO:0006813 | PROCESS  | 146  | 5  | 0.5644 | 1 | potassium ion transport                                        |
| GO:0005875 | CELLULAR | 86   | 2  | 0.5654 | 1 | microtubule associated complex                                 |
| GO:0030055 | CELLULAR | 96   | 3  | 0.5676 | 1 | cell-substrate junction                                        |
| GO:0019216 | PROCESS  | 85   | 2  | 0.5718 | 1 | regulation of lipid metabolic process                          |
| GO:0005231 | FUNCTION | 46   | 2  | 0.5720 | 1 | excitatory extracellular ligand-gated ion channel activity     |
| GO:0006091 | PROCESS  | 267  | 4  | 0.5734 | 1 | generation of precursor metabolites and energy                 |
| GO:0019220 | PROCESS  | 386  | 8  | 0.5742 | 1 | regulation of phosphate metabolic process                      |
| GO:0051174 | PROCESS  | 386  | 8  | 0.5742 | 1 | regulation of phosphorus metabolic process                     |
| GO:0016879 | FUNCTION | 203  | 4  | 0.5748 | 1 | ligase activity, forming carbon-nitrogen bonds                 |
| GO:0044087 | PROCESS  | 108  | 2  | 0.5748 | 1 | regulation of cellular component biogenesis                    |
| GO:0051704 | PROCESS  | 548  | 9  | 0.5752 | 1 | multi-organism process                                         |
| GO:0008037 | PROCESS  | 47   | 3  | 0.5784 | 1 | cell recognition                                               |
| GO:0008083 | FUNCTION | 151  | 3  | 0.5824 | 1 | growth factor activity                                         |
| GO:0045937 | PROCESS  | 85   | 2  | 0.5826 | 1 | positive regulation of phosphate metabolic process             |
| GO:0010562 | PROCESS  | 85   | 2  | 0.5826 | 1 | positive regulation of phosphorus metabolic process            |

|            |          |      |     |        |   |                                                                                                       |
|------------|----------|------|-----|--------|---|-------------------------------------------------------------------------------------------------------|
| GO:0006470 | PROCESS  | 119  | 4   | 0.5838 | 1 | protein amino acid dephosphorylation                                                                  |
| GO:0031226 | CELLULAR | 1120 | 31  | 0.5846 | 1 | intrinsic to plasma membrane                                                                          |
| GO:0043069 | PROCESS  | 277  | 5   | 0.5870 | 1 | negative regulation of programmed cell death                                                          |
| GO:0060548 | PROCESS  | 277  | 5   | 0.5870 | 1 | negative regulation of cell death                                                                     |
| GO:0005792 | CELLULAR | 174  | 3   | 0.5874 | 1 | microsome                                                                                             |
| GO:0004930 | FUNCTION | 740  | 11  | 0.5874 | 1 | G-protein coupled receptor activity                                                                   |
| GO:0006357 | PROCESS  | 593  | 11  | 0.5876 | 1 | regulation of transcription from RNA polymerase II promoter                                           |
| GO:0016021 | CELLULAR | 4828 | 108 | 0.5882 | 1 | integral to membrane                                                                                  |
| GO:0007204 | PROCESS  | 76   | 2   | 0.5884 | 1 | elevation of cytosolic calcium ion concentration                                                      |
|            |          |      |     |        |   | positive regulation of transcription from RNA polymerase II promoter                                  |
| GO:0045944 | PROCESS  | 273  | 6   | 0.5908 | 1 | promoter                                                                                              |
| GO:0033365 | PROCESS  | 119  | 2   | 0.5918 | 1 | protein localization in organelle                                                                     |
| GO:0005730 | CELLULAR | 627  | 9   | 0.5922 | 1 | nucleolus                                                                                             |
| GO:0032446 | PROCESS  | 107  | 2   | 0.5926 | 1 | protein modification by small protein conjugation                                                     |
| GO:0005267 | FUNCTION | 124  | 4   | 0.5932 | 1 | potassium channel activity                                                                            |
| GO:0007268 | PROCESS  | 235  | 8   | 0.5940 | 1 | synaptic transmission                                                                                 |
| GO:0030141 | CELLULAR | 139  | 3   | 0.5954 | 1 | secretory granule                                                                                     |
| GO:0008092 | FUNCTION | 431  | 12  | 0.5964 | 1 | cytoskeletal protein binding                                                                          |
| GO:0019725 | PROCESS  | 356  | 8   | 0.5968 | 1 | cellular homeostasis                                                                                  |
| GO:0046983 | FUNCTION | 421  | 10  | 0.5972 | 1 | protein dimerization activity                                                                         |
| GO:0002520 | PROCESS  | 194  | 4   | 0.5986 | 1 | immune system development                                                                             |
| GO:0051056 | PROCESS  | 226  | 7   | 0.6000 | 1 | regulation of small GTPase mediated signal transduction                                               |
| GO:0010628 | PROCESS  | 455  | 10  | 0.6006 | 1 | positive regulation of gene expression                                                                |
| GO:0051480 | PROCESS  | 80   | 2   | 0.6018 | 1 | cytosolic calcium ion homeostasis                                                                     |
| GO:0009607 | PROCESS  | 301  | 4   | 0.6032 | 1 | response to biotic stimulus                                                                           |
| GO:0008283 | PROCESS  | 302  | 6   | 0.6038 | 1 | cell proliferation                                                                                    |
| GO:0008081 | FUNCTION | 81   | 3   | 0.6048 | 1 | phosphoric diester hydrolase activity                                                                 |
| GO:0042692 | PROCESS  | 66   | 2   | 0.6054 | 1 | muscle cell differentiation                                                                           |
| GO:0019717 | CELLULAR | 48   | 2   | 0.6060 | 1 | synaptosome                                                                                           |
| GO:0032870 | PROCESS  | 95   | 2   | 0.6064 | 1 | cellular response to hormone stimulus                                                                 |
| GO:0016044 | PROCESS  | 313  | 7   | 0.6064 | 1 | membrane organization                                                                                 |
|            |          |      |     |        |   | oxidoreductase activity, acting on paired donors, with incorporation or reduction of molecular oxygen |
| GO:0016705 | FUNCTION | 119  | 2   | 0.6086 | 1 | motor activity                                                                                        |
| GO:0003774 | FUNCTION | 135  | 4   | 0.6108 | 1 | ligand-dependent nuclear receptor activity                                                            |
| GO:0004879 | FUNCTION | 57   | 2   | 0.6110 | 1 | secretion by cell                                                                                     |
| GO:0032940 | PROCESS  | 147  | 4   | 0.6116 | 1 | transcription cofactor activity                                                                       |
| GO:0003712 | FUNCTION | 325  | 6   | 0.6128 | 1 | cell projection organization                                                                          |
| GO:0030030 | PROCESS  | 238  | 9   | 0.6132 | 1 | sensory perception                                                                                    |
| GO:0007600 | PROCESS  | 700  | 11  | 0.6156 | 1 | cellular protein localization                                                                         |
| GO:0034613 | PROCESS  | 355  | 6   | 0.6184 | 1 | vesicular fraction                                                                                    |
| GO:0042598 | CELLULAR | 179  | 3   | 0.6188 | 1 | regulation of biological quality                                                                      |
| GO:0065008 | PROCESS  | 1108 | 24  | 0.6190 | 1 | chromatin organization                                                                                |
| GO:0006325 | PROCESS  | 331  | 5   | 0.6190 | 1 | membrane fraction                                                                                     |
| GO:0005624 | CELLULAR | 611  | 15  | 0.6202 | 1 | mRNA metabolic process                                                                                |
| GO:0016071 | PROCESS  | 334  | 5   | 0.6204 | 1 | response to external stimulus                                                                         |
| GO:0009605 | PROCESS  | 677  | 13  | 0.6210 | 1 | neuron differentiation                                                                                |
| GO:0030182 | PROCESS  | 282  | 9   | 0.6222 | 1 | proteinaceous extracellular matrix                                                                    |
| GO:0005578 | CELLULAR | 290  | 9   | 0.6230 | 1 | positive regulation of transcription, DNA-dependent                                                   |
| GO:0045893 | PROCESS  | 378  | 8   | 0.6254 | 1 | regulation of primary metabolic process                                                               |
| GO:0080090 | PROCESS  | 2937 | 49  | 0.6260 | 1 | hexose metabolic process                                                                              |
| GO:0019318 | PROCESS  | 133  | 2   | 0.6296 | 1 | ion channel complex                                                                                   |
| GO:0034702 | CELLULAR | 187  | 6   | 0.6304 | 1 | external side of plasma membrane                                                                      |
| GO:0009897 | CELLULAR | 114  | 4   | 0.6332 | 1 | positive regulation of RNA metabolic process                                                          |
| GO:0051254 | PROCESS  | 381  | 8   | 0.6336 | 1 | forebrain development                                                                                 |
| GO:0030900 | PROCESS  | 88   | 2   | 0.6336 | 1 | macromolecular complex                                                                                |
| GO:0032991 | CELLULAR | 2668 | 45  | 0.6348 | 1 | vesicle membrane                                                                                      |
| GO:0012506 | CELLULAR | 120  | 3   | 0.6368 | 1 | polysaccharide metabolic process                                                                      |
| GO:0005976 | PROCESS  | 97   | 2   | 0.6374 | 1 | cellular macromolecule localization                                                                   |
| GO:0070727 | PROCESS  | 358  | 6   | 0.6378 | 1 | heterocycle metabolic process                                                                         |
| GO:0046483 | PROCESS  | 280  | 6   | 0.6396 | 1 | dephosphorylation                                                                                     |
| GO:0016311 | PROCESS  | 134  | 4   | 0.6396 | 1 | exo-peptidase activity                                                                                |
| GO:0008238 | FUNCTION | 72   | 2   | 0.6402 | 1 | cadherin binding                                                                                      |
| GO:0045296 | FUNCTION | 13   | 2   | 0.6402 | 1 | oxidation reduction                                                                                   |
| GO:0055114 | PROCESS  | 569  | 10  | 0.6408 | 1 | learning or memory                                                                                    |
| GO:0007611 | PROCESS  | 63   | 2   | 0.6412 | 1 | cell cycle process                                                                                    |
| GO:0022402 | PROCESS  | 505  | 7   | 0.6424 | 1 | cell-cell signaling                                                                                   |
| GO:0007267 | PROCESS  | 497  | 12  | 0.6450 | 1 | organ development                                                                                     |
| GO:0048513 | PROCESS  | 1318 | 30  | 0.6452 | 1 | mitochondrial membrane                                                                                |
| GO:0031966 | CELLULAR | 325  | 4   | 0.6452 | 1 | heme binding                                                                                          |
| GO:0020037 | FUNCTION | 111  | 2   | 0.6454 | 1 | positive regulation of cell differentiation                                                           |
| GO:0045597 | PROCESS  | 169  | 4   | 0.6456 | 1 |                                                                                                       |

|            |          |      |    |        |   |                                                                                                |
|------------|----------|------|----|--------|---|------------------------------------------------------------------------------------------------|
| GO:0030955 | FUNCTION | 124  | 4  | 0.6464 | 1 | potassium ion binding                                                                          |
| GO:0048731 | PROCESS  | 1802 | 44 | 0.6468 | 1 | system development                                                                             |
| GO:0048514 | PROCESS  | 153  | 4  | 0.6494 | 1 | blood vessel morphogenesis                                                                     |
| GO:0007601 | PROCESS  | 205  | 5  | 0.6500 | 1 | visual perception                                                                              |
| GO:0050953 | PROCESS  | 205  | 5  | 0.6500 | 1 | sensory perception of light stimulus                                                           |
| GO:0009790 | PROCESS  | 405  | 8  | 0.6506 | 1 | embryonic development                                                                          |
| GO:0008270 | FUNCTION | 2119 | 38 | 0.6532 | 1 | zinc ion binding                                                                               |
| GO:0005126 | FUNCTION | 171  | 2  | 0.6538 | 1 | cytokine receptor binding                                                                      |
| GO:0048037 | FUNCTION | 213  | 4  | 0.6542 | 1 | cofactor binding                                                                               |
| GO:0042325 | PROCESS  | 372  | 7  | 0.6568 | 1 | regulation of phosphorylation                                                                  |
| GO:0010740 | PROCESS  | 145  | 2  | 0.6612 | 1 | positive regulation of protein kinase cascade                                                  |
| GO:0051239 | PROCESS  | 689  | 15 | 0.6614 | 1 | regulation of multicellular organismal process                                                 |
| GO:0031323 | PROCESS  | 3075 | 51 | 0.6626 | 1 | regulation of cellular metabolic process                                                       |
| GO:0050878 | PROCESS  | 109  | 2  | 0.6642 | 1 | regulation of body fluid levels                                                                |
| GO:0000267 | CELLULAR | 794  | 18 | 0.6646 | 1 | cell fraction                                                                                  |
| GO:0006397 | PROCESS  | 291  | 4  | 0.6650 | 1 | mRNA processing                                                                                |
| GO:0016881 | FUNCTION | 176  | 3  | 0.6660 | 1 | acid-amino acid ligase activity                                                                |
| GO:0050662 | FUNCTION | 153  | 3  | 0.6662 | 1 | coenzyme binding                                                                               |
| GO:0007346 | PROCESS  | 138  | 2  | 0.6666 | 1 | regulation of mitotic cell cycle                                                               |
| GO:0005201 | FUNCTION | 76   | 2  | 0.6682 | 1 | extracellular matrix structural constituent                                                    |
| GO:0019898 | CELLULAR | 460  | 12 | 0.6684 | 1 | extrinsic to membrane                                                                          |
| GO:0010468 | PROCESS  | 2571 | 41 | 0.6696 | 1 | regulation of gene expression                                                                  |
| GO:0006631 | PROCESS  | 179  | 3  | 0.6698 | 1 | fatty acid metabolic process                                                                   |
| GO:0050890 | PROCESS  | 757  | 12 | 0.6714 | 1 | cognition                                                                                      |
| GO:0031401 | PROCESS  | 101  | 2  | 0.6738 | 1 | positive regulation of protein modification process                                            |
| GO:0065003 | PROCESS  | 461  | 7  | 0.6744 | 1 | macromolecular complex assembly                                                                |
| GO:0040008 | PROCESS  | 243  | 4  | 0.6746 | 1 | regulation of growth                                                                           |
| GO:0004721 | FUNCTION | 150  | 4  | 0.6748 | 1 | phosphoprotein phosphatase activity                                                            |
| GO:0019901 | FUNCTION | 104  | 2  | 0.6752 | 1 | protein kinase binding                                                                         |
| GO:0003008 | PROCESS  | 1263 | 25 | 0.6766 | 1 | system process                                                                                 |
| GO:0031012 | CELLULAR | 308  | 9  | 0.6766 | 1 | extracellular matrix                                                                           |
| GO:0070161 | CELLULAR | 149  | 5  | 0.6778 | 1 | anchoring junction                                                                             |
| GO:0006807 | PROCESS  | 1878 | 30 | 0.6786 | 1 | nitrogen compound metabolic process                                                            |
| GO:0050839 | FUNCTION | 21   | 2  | 0.6816 | 1 | cell adhesion molecule binding                                                                 |
| GO:0042127 | PROCESS  | 604  | 11 | 0.6834 | 1 | regulation of cell proliferation                                                               |
| GO:0005626 | CELLULAR | 626  | 15 | 0.6836 | 1 | insoluble fraction                                                                             |
| GO:0043933 | PROCESS  | 508  | 8  | 0.6852 | 1 | macromolecular complex subunit organization                                                    |
| GO:0005740 | CELLULAR | 346  | 4  | 0.6870 | 1 | mitochondrial envelope                                                                         |
| GO:0046873 | FUNCTION | 296  | 10 | 0.6874 | 1 | metal ion transmembrane transporter activity                                                   |
| GO:0008361 | PROCESS  | 131  | 2  | 0.6880 | 1 | regulation of cell size                                                                        |
| GO:0007186 | PROCESS  | 945  | 14 | 0.6882 | 1 | G-protein coupled receptor protein signaling pathway                                           |
| GO:0070647 | PROCESS  | 132  | 2  | 0.6916 | 1 | protein modification by small protein conjugation or removal                                   |
| GO:0042626 | FUNCTION | 93   | 3  | 0.6946 | 1 | ATPase activity, coupled to transmembrane movement of substances                               |
| GO:0042623 | FUNCTION | 238  | 5  | 0.6946 | 1 | ATPase activity, coupled                                                                       |
| GO:0019899 | FUNCTION | 404  | 9  | 0.6950 | 1 | enzyme binding                                                                                 |
| GO:0031988 | CELLULAR | 466  | 9  | 0.6964 | 1 | membrane-bounded vesicle                                                                       |
| GO:0043492 | FUNCTION | 94   | 3  | 0.6986 | 1 | ATPase activity, coupled to movement of substances                                             |
| GO:0050804 | PROCESS  | 65   | 2  | 0.6996 | 1 | regulation of synaptic transmission                                                            |
| GO:0046906 | FUNCTION | 119  | 2  | 0.6996 | 1 | tetrapyrrole binding                                                                           |
| GO:0032269 | PROCESS  | 125  | 2  | 0.7000 | 1 | negative regulation of cellular protein metabolic process                                      |
| GO:0003002 | PROCESS  | 146  | 2  | 0.7000 | 1 | regionalization                                                                                |
| GO:0016820 | FUNCTION | 95   | 3  | 0.7002 | 1 | hydrolase activity, acting on acid anhydrides, catalyzing transmembrane movement of substances |
| GO:0015629 | CELLULAR | 224  | 6  | 0.7010 | 1 | actin cytoskeleton                                                                             |
| GO:0008544 | PROCESS  | 153  | 2  | 0.7030 | 1 | epidermis development                                                                          |
| GO:0030097 | PROCESS  | 163  | 3  | 0.7030 | 1 | hemopoiesis                                                                                    |
| GO:0046943 | FUNCTION | 80   | 2  | 0.7030 | 1 | carboxylic acid transmembrane transporter activity                                             |
| GO:0001568 | PROCESS  | 172  | 4  | 0.7036 | 1 | blood vessel development                                                                       |
| GO:0016477 | PROCESS  | 196  | 5  | 0.7038 | 1 | cell migration                                                                                 |
| GO:0005342 | FUNCTION | 81   | 2  | 0.7046 | 1 | organic acid transmembrane transporter activity                                                |
| GO:0045596 | PROCESS  | 157  | 3  | 0.7050 | 1 | negative regulation of cell differentiation                                                    |
| GO:0030001 | PROCESS  | 410  | 13 | 0.7060 | 1 | metal ion transport                                                                            |
| GO:0004252 | FUNCTION | 151  | 2  | 0.7070 | 1 | serine-type endopeptidase activity                                                             |
| GO:0006355 | PROCESS  | 1567 | 24 | 0.7084 | 1 | regulation of transcription, DNA-dependent                                                     |
| GO:0034984 | PROCESS  | 299  | 4  | 0.7092 | 1 | cellular response to DNA damage stimulus                                                       |
| GO:0015405 | FUNCTION | 104  | 3  | 0.7104 | 1 | P-P-bond-hydrolysis-driven transmembrane transporter activity                                  |
| GO:0015399 | FUNCTION | 104  | 3  | 0.7104 | 1 | primary active transmembrane transporter activity                                              |
| GO:0001944 | PROCESS  | 177  | 4  | 0.7130 | 1 | vasculature development                                                                        |
| GO:0007156 | PROCESS  | 131  | 4  | 0.7132 | 1 | homophilic cell adhesion                                                                       |
| GO:0043169 | FUNCTION | 3870 | 83 | 0.7134 | 1 | cation binding                                                                                 |

|            |          |      |    |        |   |                                                       |
|------------|----------|------|----|--------|---|-------------------------------------------------------|
| GO:0019935 | PROCESS  | 110  | 2  | 0.7136 | 1 | cyclic-nucleotide-mediated signaling                  |
| GO:0050877 | PROCESS  | 1007 | 19 | 0.7160 | 1 | neurological system process                           |
| GO:0006259 | PROCESS  | 443  | 6  | 0.7160 | 1 | DNA metabolic process                                 |
| GO:0046914 | FUNCTION | 2555 | 46 | 0.7162 | 1 | transition metal ion binding                          |
| GO:0019838 | FUNCTION | 89   | 2  | 0.7164 | 1 | growth factor binding                                 |
| GO:0051969 | PROCESS  | 72   | 2  | 0.7180 | 1 | regulation of transmission of nerve impulse           |
| GO:0009719 | PROCESS  | 199  | 4  | 0.7204 | 1 | response to endogenous stimulus                       |
| GO:0001701 | PROCESS  | 115  | 2  | 0.7204 | 1 | in utero embryonic development                        |
| GO:0043009 | PROCESS  | 229  | 4  | 0.7206 | 1 | chordate embryonic development                        |
| GO:0008380 | PROCESS  | 255  | 3  | 0.7220 | 1 | RNA splicing                                          |
| GO:0040012 | PROCESS  | 174  | 4  | 0.7222 | 1 | regulation of locomotion                              |
| GO:0031644 | PROCESS  | 75   | 2  | 0.7238 | 1 | regulation of neurological system process             |
| GO:0004842 | FUNCTION | 127  | 2  | 0.7238 | 1 | ubiquitin-protein ligase activity                     |
| GO:0001653 | FUNCTION | 102  | 2  | 0.7242 | 1 | peptide receptor activity                             |
| GO:0009792 | PROCESS  | 231  | 4  | 0.7250 | 1 | embryonic development ending in birth or egg hatching |
| GO:0007049 | PROCESS  | 696  | 9  | 0.7278 | 1 | cell cycle                                            |
| GO:0017124 | FUNCTION | 83   | 2  | 0.7300 | 1 | SH3 domain binding                                    |
| GO:0018193 | PROCESS  | 121  | 2  | 0.7304 | 1 | peptidyl-amino acid modification                      |
| GO:0046872 | FUNCTION | 3836 | 82 | 0.7306 | 1 | metal ion binding                                     |
| GO:0003779 | FUNCTION | 288  | 8  | 0.7326 | 1 | actin binding                                         |
| GO:0005529 | FUNCTION | 170  | 3  | 0.7342 | 1 | sugar binding                                         |
| GO:0051128 | PROCESS  | 361  | 7  | 0.7342 | 1 | regulation of cellular component organization         |
| GO:0007389 | PROCESS  | 195  | 3  | 0.7346 | 1 | pattern specification process                         |
| GO:0042391 | PROCESS  | 89   | 2  | 0.7354 | 1 | regulation of membrane potential                      |
| GO:0005230 | FUNCTION | 66   | 2  | 0.7360 | 1 | extracellular ligand-gated ion channel activity       |
| GO:0040007 | PROCESS  | 121  | 2  | 0.7368 | 1 | growth                                                |
| GO:0060255 | PROCESS  | 2924 | 46 | 0.7378 | 1 | regulation of macromolecule metabolic process         |
| GO:0051252 | PROCESS  | 1598 | 24 | 0.7380 | 1 | regulation of RNA metabolic process                   |
| GO:0034660 | PROCESS  | 217  | 2  | 0.7388 | 1 | ncRNA metabolic process                               |
| GO:0007160 | PROCESS  | 79   | 2  | 0.7418 | 1 | cell-matrix adhesion                                  |
| GO:0048856 | PROCESS  | 1938 | 45 | 0.7430 | 1 | anatomical structure development                      |
| GO:0007398 | PROCESS  | 167  | 2  | 0.7434 | 1 | ectoderm development                                  |
| GO:0051248 | PROCESS  | 131  | 2  | 0.7450 | 1 | negative regulation of protein metabolic process      |
| GO:0005509 | FUNCTION | 864  | 26 | 0.7458 | 1 | calcium ion binding                                   |
| GO:0006520 | PROCESS  | 213  | 3  | 0.7466 | 1 | cellular amino acid metabolic process                 |
| GO:0044106 | PROCESS  | 213  | 3  | 0.7466 | 1 | cellular amine metabolic process                      |
| GO:0031399 | PROCESS  | 178  | 3  | 0.7468 | 1 | regulation of protein modification process            |
| GO:0005099 | FUNCTION | 79   | 2  | 0.7468 | 1 | Ras GTPase activator activity                         |
| GO:0040011 | PROCESS  | 333  | 7  | 0.7480 | 1 | locomotion                                            |
| GO:0019226 | PROCESS  | 276  | 8  | 0.7494 | 1 | transmission of nerve impulse                         |
| GO:0019222 | PROCESS  | 3211 | 52 | 0.7522 | 1 | regulation of metabolic process                       |
| GO:0051246 | PROCESS  | 466  | 7  | 0.7532 | 1 | regulation of protein metabolic process               |
| GO:0019787 | FUNCTION | 141  | 2  | 0.7534 | 1 | small conjugating protein ligase activity             |
| GO:0043233 | CELLULAR | 1633 | 22 | 0.7538 | 1 | organelle lumen                                       |
| GO:0032268 | PROCESS  | 407  | 6  | 0.7542 | 1 | regulation of cellular protein metabolic process      |
| GO:0015276 | FUNCTION | 112  | 4  | 0.7548 | 1 | ligand-gated ion channel activity                     |
| GO:0022834 | FUNCTION | 112  | 4  | 0.7548 | 1 | ligand-gated channel activity                         |
| GO:0006974 | PROCESS  | 329  | 4  | 0.7564 | 1 | response to DNA damage stimulus                       |
| GO:0048534 | PROCESS  | 183  | 3  | 0.7572 | 1 | hemopoietic or lymphoid organ development             |
| GO:0005912 | CELLULAR | 130  | 4  | 0.7582 | 1 | adherens junction                                     |
| GO:0044433 | CELLULAR | 154  | 3  | 0.7606 | 1 | cytoplasmic vesicle part                              |
| GO:0005261 | FUNCTION | 252  | 8  | 0.7622 | 1 | cation channel activity                               |
| GO:0010817 | PROCESS  | 111  | 2  | 0.7636 | 1 | regulation of hormone levels                          |
| GO:0016491 | FUNCTION | 623  | 10 | 0.7648 | 1 | oxidoreductase activity                               |
| GO:0051020 | FUNCTION | 77   | 2  | 0.7654 | 1 | GTPase binding                                        |
| GO:0014069 | CELLULAR | 43   | 2  | 0.7660 | 1 | postsynaptic density                                  |
| GO:0010926 | PROCESS  | 836  | 15 | 0.7676 | 1 | anatomical structure formation                        |
| GO:0045121 | CELLULAR | 82   | 2  | 0.7676 | 1 | membrane raft                                         |
| GO:0006790 | PROCESS  | 94   | 2  | 0.7676 | 1 | sulfur metabolic process                              |
| GO:0044456 | CELLULAR | 181  | 7  | 0.7678 | 1 | synapse part                                          |
| GO:0010646 | PROCESS  | 800  | 17 | 0.7680 | 1 | regulation of cell communication                      |
| GO:0044463 | CELLULAR | 134  | 3  | 0.7710 | 1 | cell projection part                                  |
| GO:0043565 | FUNCTION | 523  | 8  | 0.7732 | 1 | sequence-specific DNA binding                         |
| GO:0043167 | FUNCTION | 3920 | 83 | 0.7734 | 1 | ion binding                                           |
| GO:0031974 | CELLULAR | 1664 | 22 | 0.7744 | 1 | membrane-enclosed lumen                               |
| GO:0006281 | PROCESS  | 257  | 3  | 0.7756 | 1 | DNA repair                                            |
| GO:0070013 | CELLULAR | 1597 | 21 | 0.7766 | 1 | intracellular organelle lumen                         |
| GO:0019900 | FUNCTION | 125  | 2  | 0.7770 | 1 | kinase binding                                        |
| GO:0022607 | PROCESS  | 635  | 10 | 0.7784 | 1 | cellular component assembly                           |
| GO:0003824 | FUNCTION | 4750 | 90 | 0.7856 | 1 | catalytic activity                                    |
| GO:0044451 | CELLULAR | 468  | 6  | 0.7860 | 1 | nucleoplasm part                                      |

|            |          |      |    |        |   |                                                                             |
|------------|----------|------|----|--------|---|-----------------------------------------------------------------------------|
| GO:0001558 | PROCESS  | 133  | 2  | 0.7866 | 1 | regulation of cell growth                                                   |
| GO:0005625 | CELLULAR | 199  | 3  | 0.7878 | 1 | soluble fraction                                                            |
| GO:0005856 | CELLULAR | 1184 | 25 | 0.7878 | 1 | cytoskeleton                                                                |
| GO:0043085 | PROCESS  | 431  | 7  | 0.7886 | 1 | positive regulation of catalytic activity                                   |
| GO:0016887 | FUNCTION | 299  | 6  | 0.7896 | 1 | ATPase activity                                                             |
| GO:0006461 | PROCESS  | 323  | 5  | 0.7928 | 1 | protein complex assembly                                                    |
| GO:0070271 | PROCESS  | 323  | 5  | 0.7928 | 1 | protein complex biogenesis                                                  |
| GO:0001932 | PROCESS  | 136  | 2  | 0.7942 | 1 | regulation of protein amino acid phosphorylation                            |
| GO:0005096 | FUNCTION | 202  | 5  | 0.7946 | 1 | GTPase activator activity                                                   |
| GO:0005249 | FUNCTION | 94   | 2  | 0.7958 | 1 | voltage-gated potassium channel activity                                    |
| GO:0090066 | PROCESS  | 222  | 3  | 0.7964 | 1 | regulation of anatomical structure size                                     |
| GO:0031589 | PROCESS  | 89   | 2  | 0.7968 | 1 | cell-substrate adhesion                                                     |
| GO:0005539 | FUNCTION | 122  | 2  | 0.7992 | 1 | glycosaminoglycan binding                                                   |
| GO:0070887 | PROCESS  | 196  | 3  | 0.8008 | 1 | cellular response to chemical stimulus                                      |
| GO:0034641 | PROCESS  | 224  | 3  | 0.8010 | 1 | cellular nitrogen compound metabolic process                                |
| GO:0001775 | PROCESS  | 201  | 3  | 0.8020 | 1 | cell activation                                                             |
| GO:0007605 | PROCESS  | 80   | 2  | 0.8030 | 1 | sensory perception of sound                                                 |
| GO:0030136 | CELLULAR | 101  | 2  | 0.8036 | 1 | clathrin-coated vesicle                                                     |
| GO:0006350 | PROCESS  | 267  | 3  | 0.8040 | 1 | transcription                                                               |
| GO:0008415 | FUNCTION | 177  | 2  | 0.8056 | 1 | acyltransferase activity                                                    |
| GO:0045860 | PROCESS  | 171  | 3  | 0.8072 | 1 | positive regulation of protein kinase activity                              |
| GO:0004714 | FUNCTION | 64   | 2  | 0.8080 | 1 | transmembrane receptor protein tyrosine kinase activity                     |
| GO:0016023 | CELLULAR | 460  | 8  | 0.8084 | 1 | cytoplasmic membrane-bounded vesicle                                        |
| GO:0033674 | PROCESS  | 172  | 3  | 0.8094 | 1 | positive regulation of kinase activity                                      |
| GO:0006366 | PROCESS  | 175  | 2  | 0.8154 | 1 | transcription from RNA polymerase II promoter                               |
| GO:0016747 | FUNCTION | 179  | 2  | 0.8160 | 1 | transferase activity, transferring acyl groups other than amino-acyl groups |
| GO:0042578 | FUNCTION | 313  | 7  | 0.8198 | 1 | phosphoric ester hydrolase activity                                         |
| GO:0042277 | FUNCTION | 169  | 3  | 0.8200 | 1 | peptide binding                                                             |
| GO:0005743 | CELLULAR | 242  | 2  | 0.8218 | 1 | mitochondrial inner membrane                                                |
| GO:0030659 | CELLULAR | 112  | 2  | 0.8218 | 1 | cytoplasmic vesicle membrane                                                |
| GO:0051345 | PROCESS  | 154  | 2  | 0.8218 | 1 | positive regulation of hydrolase activity                                   |
| GO:0005057 | FUNCTION | 153  | 3  | 0.8226 | 1 | receptor signaling protein activity                                         |
| GO:0016746 | FUNCTION | 187  | 2  | 0.8260 | 1 | transferase activity, transferring acyl groups                              |
| GO:0009966 | PROCESS  | 715  | 14 | 0.8260 | 1 | regulation of signal transduction                                           |
| GO:0030247 | FUNCTION | 130  | 2  | 0.8262 | 1 | polysaccharide binding                                                      |
| GO:0001871 | FUNCTION | 130  | 2  | 0.8262 | 1 | pattern binding                                                             |
| GO:0030334 | PROCESS  | 159  | 3  | 0.8284 | 1 | regulation of cell migration                                                |
| GO:0051347 | PROCESS  | 179  | 3  | 0.8284 | 1 | positive regulation of transferase activity                                 |
| GO:0015630 | CELLULAR | 465  | 7  | 0.8306 | 1 | microtubule cytoskeleton                                                    |
| GO:0006811 | PROCESS  | 689  | 18 | 0.8344 | 1 | ion transport                                                               |
| GO:0043234 | CELLULAR | 2171 | 37 | 0.8370 | 1 | protein complex                                                             |
| GO:0008610 | PROCESS  | 290  | 4  | 0.8372 | 1 | lipid biosynthetic process                                                  |
| GO:0050954 | PROCESS  | 84   | 2  | 0.8374 | 1 | sensory perception of mechanical stimulus                                   |
| GO:0009308 | PROCESS  | 350  | 5  | 0.8378 | 1 | amine metabolic process                                                     |
| GO:0031252 | CELLULAR | 108  | 2  | 0.8478 | 1 | cell leading edge                                                           |
| GO:0050790 | PROCESS  | 710  | 11 | 0.8486 | 1 | regulation of catalytic activity                                            |
| GO:0030135 | CELLULAR | 126  | 2  | 0.8498 | 1 | coated vesicle                                                              |
| GO:0019866 | CELLULAR | 258  | 2  | 0.8504 | 1 | organelle inner membrane                                                    |
| GO:0044429 | CELLULAR | 516  | 5  | 0.8516 | 1 | mitochondrial part                                                          |
| GO:0044085 | PROCESS  | 738  | 10 | 0.8550 | 1 | cellular component biogenesis                                               |
| GO:0032535 | PROCESS  | 184  | 2  | 0.8550 | 1 | regulation of cellular component size                                       |
| GO:0030054 | CELLULAR | 461  | 14 | 0.8584 | 1 | cell junction                                                               |
| GO:0044459 | CELLULAR | 1960 | 51 | 0.8588 | 1 | plasma membrane part                                                        |
| GO:0008284 | PROCESS  | 306  | 4  | 0.8632 | 1 | positive regulation of cell proliferation                                   |
| GO:0022843 | FUNCTION | 134  | 3  | 0.8636 | 1 | voltage-gated cation channel activity                                       |
| GO:0016791 | FUNCTION | 231  | 4  | 0.8676 | 1 | phosphatase activity                                                        |
| GO:0005911 | CELLULAR | 156  | 3  | 0.8678 | 1 | cell-cell junction                                                          |
| GO:0060341 | PROCESS  | 174  | 2  | 0.8698 | 1 | regulation of cellular localization                                         |
| GO:0001525 | PROCESS  | 110  | 2  | 0.8710 | 1 | angiogenesis                                                                |
| GO:0045202 | CELLULAR | 265  | 9  | 0.8726 | 1 | synapse                                                                     |
| GO:0044093 | PROCESS  | 479  | 7  | 0.8728 | 1 | positive regulation of molecular function                                   |
| GO:0032561 | FUNCTION | 340  | 4  | 0.8760 | 1 | guanyl ribonucleotide binding                                               |
| GO:0019001 | FUNCTION | 340  | 4  | 0.8760 | 1 | guanyl nucleotide binding                                                   |
| GO:0006396 | PROCESS  | 504  | 5  | 0.8770 | 1 | RNA processing                                                              |
| GO:0022838 | FUNCTION | 364  | 10 | 0.8788 | 1 | substrate-specific channel activity                                         |
| GO:0019199 | FUNCTION | 80   | 2  | 0.8796 | 1 | transmembrane receptor protein kinase activity                              |
| GO:0008134 | FUNCTION | 450  | 6  | 0.8806 | 1 | transcription factor binding                                                |
| GO:0016070 | PROCESS  | 825  | 9  | 0.8808 | 1 | RNA metabolic process                                                       |
| GO:0051270 | PROCESS  | 175  | 3  | 0.8820 | 1 | regulation of cell motion                                                   |
| GO:0015267 | FUNCTION | 372  | 10 | 0.8830 | 1 | channel activity                                                            |



|            |          |      |    |        |   |                                                                                    |
|------------|----------|------|----|--------|---|------------------------------------------------------------------------------------|
| GO:0022803 | FUNCTION | 372  | 10 | 0.8830 | 1 | passive transmembrane transporter activity                                         |
| GO:0022836 | FUNCTION | 283  | 8  | 0.8836 | 1 | gated channel activity                                                             |
| GO:0008047 | FUNCTION | 302  | 6  | 0.8842 | 1 | enzyme activator activity                                                          |
| GO:0051049 | PROCESS  | 318  | 5  | 0.8880 | 1 | regulation of transport                                                            |
| GO:0005244 | FUNCTION | 177  | 4  | 0.8896 | 1 | voltage-gated ion channel activity                                                 |
| GO:0022832 | FUNCTION | 177  | 4  | 0.8896 | 1 | voltage-gated channel activity                                                     |
| GO:0006351 | PROCESS  | 225  | 2  | 0.8898 | 1 | transcription, DNA-dependent                                                       |
| GO:0048471 | CELLULAR | 220  | 3  | 0.8914 | 1 | perinuclear region of cytoplasm                                                    |
| GO:0032774 | PROCESS  | 229  | 2  | 0.8928 | 1 | RNA biosynthetic process                                                           |
| GO:0005813 | CELLULAR | 191  | 2  | 0.8966 | 1 | centrosome                                                                         |
| GO:0010627 | PROCESS  | 225  | 2  | 0.8980 | 1 | regulation of protein kinase cascade                                               |
| GO:0007155 | PROCESS  | 647  | 19 | 0.9026 | 1 | cell adhesion                                                                      |
| GO:0022610 | PROCESS  | 648  | 19 | 0.9026 | 1 | biological adhesion                                                                |
| GO:0042995 | CELLULAR | 464  | 11 | 0.9034 | 1 | cell projection                                                                    |
| GO:0065009 | PROCESS  | 811  | 12 | 0.9056 | 1 | regulation of molecular function                                                   |
| GO:0004725 | FUNCTION | 92   | 2  | 0.9074 | 1 | protein tyrosine phosphatase activity                                              |
| GO:0044430 | CELLULAR | 795  | 12 | 0.9130 | 1 | cytoskeletal part                                                                  |
| GO:0009898 | CELLULAR | 291  | 4  | 0.9164 | 1 | internal side of plasma membrane                                                   |
| GO:0004175 | FUNCTION | 355  | 4  | 0.9172 | 1 | endopeptidase activity                                                             |
| GO:0008509 | FUNCTION | 131  | 2  | 0.9178 | 1 | anion transmembrane transporter activity                                           |
| GO:0032879 | PROCESS  | 486  | 8  | 0.9190 | 1 | regulation of localization                                                         |
| GO:0030246 | FUNCTION | 301  | 4  | 0.9204 | 1 | carbohydrate binding                                                               |
| GO:0005525 | FUNCTION | 331  | 3  | 0.9224 | 1 | GTP binding                                                                        |
| GO:0006816 | PROCESS  | 112  | 3  | 0.9230 | 1 | calcium ion transport                                                              |
| GO:0009986 | CELLULAR | 247  | 5  | 0.9236 | 1 | cell surface                                                                       |
| GO:0070838 | PROCESS  | 113  | 3  | 0.9238 | 1 | divalent metal ion transport                                                       |
| GO:0005216 | FUNCTION | 354  | 9  | 0.9260 | 1 | ion channel activity                                                               |
| GO:0070011 | FUNCTION | 515  | 7  | 0.9274 | 1 | peptidase activity, acting on L-amino acid peptides                                |
| GO:0005815 | CELLULAR | 213  | 2  | 0.9298 | 1 | microtubule organizing center                                                      |
| GO:0005262 | FUNCTION | 73   | 2  | 0.9320 | 1 | calcium channel activity                                                           |
| GO:0008233 | FUNCTION | 531  | 7  | 0.9337 | 1 | peptidase activity                                                                 |
| GO:0006519 | PROCESS  | 315  | 3  | 0.9409 | 1 | cellular amino acid and derivative metabolic process                               |
| GO:0015674 | PROCESS  | 141  | 3  | 0.9421 | 1 | di-, tri-valent inorganic cation transport                                         |
| GO:0044419 | PROCESS  | 264  | 2  | 0.9427 | 1 | interspecies interaction between organisms                                         |
| GO:0016788 | FUNCTION | 638  | 9  | 0.9443 | 1 | hydrolase activity, acting on ester bonds                                          |
| GO:0005516 | FUNCTION | 129  | 2  | 0.9527 | 1 | calmodulin binding                                                                 |
| GO:0016462 | FUNCTION | 680  | 10 | 0.9545 | 1 | pyrophosphatase activity                                                           |
| GO:0009967 | PROCESS  | 241  | 2  | 0.9549 | 1 | positive regulation of signal transduction                                         |
| GO:0016818 | FUNCTION | 683  | 10 | 0.9567 | 1 | hydrolase activity, acting on acid anhydrides, in phosphorus-containing anhydrides |
| GO:0008237 | FUNCTION | 172  | 2  | 0.9573 | 1 | metallopeptidase activity                                                          |
| GO:0016817 | FUNCTION | 687  | 10 | 0.9583 | 1 | hydrolase activity, acting on acid anhydrides                                      |
| GO:0017111 | FUNCTION | 653  | 9  | 0.9597 | 1 | nucleoside-triphosphatase activity                                                 |
| GO:0007626 | PROCESS  | 216  | 2  | 0.9681 | 1 | locomotory behavior                                                                |
| GO:0010647 | PROCESS  | 253  | 2  | 0.9719 | 1 | positive regulation of cell communication                                          |
| GO:0007610 | PROCESS  | 348  | 4  | 0.9731 | 1 | behavior                                                                           |
| GO:0001501 | PROCESS  | 243  | 2  | 0.9733 | 1 | skeletal system development                                                        |
| GO:0043005 | CELLULAR | 171  | 3  | 0.9767 | 1 | neuron projection                                                                  |
| GO:0051336 | PROCESS  | 287  | 2  | 0.9827 | 1 | regulation of hydrolase activity                                                   |
| GO:0003723 | FUNCTION | 653  | 5  | 0.9845 | 1 | RNA binding                                                                        |
| GO:0016787 | FUNCTION | 2089 | 31 | 0.9905 | 1 | hydrolase activity                                                                 |
| GO:0016337 | PROCESS  | 256  | 4  | 0.9907 | 1 | cell-cell adhesion                                                                 |
