# Supplementary material for: Genetic Evidence Implicates the Immune System and Cholesterol Metabolism in the Aetiology of Alzheimer's Disease
Source: PubMed Central journal article supplement (PMC2981526; doi:10.1371/journal.pone.0013950), 2010-11-15
Supplement: pone.0013950.s005.pdf [file pone.0013950.s005.pdf]

**Table S5 MGI mouse phenotypes identified by ALIGATOR analysis of the AD GWA data of Harold and colleagues (7)**

The 589 genes identified as having GWAS SNP signals  $p < 0.001$  were used: APOE was included in the gene list. In this analysis one SNP was not allowed to add more than one gene to any phenotype.

"Study-wide p-value" is the probability of obtaining by chance at least one mouse phenotype with a phenotype-specific enrichment p-value at least as significant as that observed.

| Phenotype number | total genes in pathway | #genes on list | expected #genes on list | p-value | Study-wide corrected p-value | Function                                                 |
|------------------|------------------------|----------------|-------------------------|---------|------------------------------|----------------------------------------------------------|
| 6084             | 12                     | 6              | 0.53                    | <0.0001 | 0.323                        | abnormal circulating phospholipid level                  |
| 5339             | 11                     | 4              | 0.59                    | 0.0006  | 0.652                        | increased susceptibility to atherosclerosis              |
| 4777             | 25                     | 6              | 1.18                    | 0.0008  | 0.716                        | abnormal phospholipid level                              |
| 3980             | 6                      | 3              | 0.18                    | 0.0010  | 0.763                        | increased circulating phospholipid level                 |
| 6303             | 9                      | 3              | 0.24                    | 0.0010  | 0.763                        | abnormal retinal nerve fiber layer morphology            |
| 5340             | 18                     | 4              | 0.72                    | 0.0012  | 0.802                        | altered susceptibility to atherosclerosis                |
| 3976             | 5                      | 2              | 0.06                    | 0.0012  | 0.802                        | decreased circulating VLDL triglyceride level            |
| 2442             | 777                    | 38             | 23.36                   | 0.0020  | 0.902                        | abnormal leukocyte physiology                            |
| 3009             | 347                    | 19             | 9.4                     | 0.0022  | 0.919                        | abnormal cytokine secretion                              |
| 6207             | 589                    | 30             | 18.19                   | 0.0022  | 0.919                        | embryonic lethality during organogenesis                 |
| 2421             | 794                    | 38             | 23.77                   | 0.0024  | 0.929                        | abnormal cell-mediated immunity                          |
| 2420             | 798                    | 38             | 23.87                   | 0.0024  | 0.929                        | abnormal adaptive immunity                               |
| 1819             | 793                    | 38             | 23.74                   | 0.0024  | 0.929                        | abnormal immune cell physiology                          |
| 5338             | 20                     | 4              | 0.75                    | 0.0024  | 0.929                        | atherosclerotic lesions                                  |
| 8704             | 68                     | 6              | 1.5                     | 0.0032  | 0.964                        | abnormal interleukin-6 secretion                         |
| 3991             | 22                     | 4              | 0.82                    | 0.0034  | 0.971                        | arteriosclerosis                                         |
| 4801             | 7                      | 2              | 0.09                    | 0.0034  | 0.971                        | increased susceptibility to systemic lupus erythematosus |
| 5014             | 95                     | 8              | 2.61                    | 0.0038  | 0.977                        | increased B cell number                                  |
| 8477             | 5                      | 2              | 0.12                    | 0.0038  | 0.977                        | decreased spleen red pulp amount                         |
| 8568             | 213                    | 13             | 5.56                    | 0.0040  | 0.980                        | abnormal interleukin secretion                           |
| 2723             | 553                    | 27             | 15.44                   | 0.0040  | 0.980                        | abnormal immune serum protein physiology                 |
| 2080             | 1262                   | 52             | 37.17                   | 0.0054  | 0.993                        | prenatal lethality                                       |
| 3842             | 4                      | 2              | 0.15                    | 0.0060  | 0.996                        | abnormal metopic suture morphology                       |
| 4810             | 18                     | 3              | 0.45                    | 0.0064  | 0.996                        | decreased hematopoietic stem cell number                 |
| 4808             | 35                     | 4              | 0.76                    | 0.0066  | 0.997                        | abnormal hematopoietic stem cell morphology              |
| 5144             | 32                     | 4              | 0.79                    | 0.0070  | 0.997                        | abnormal circulating VLDL cholesterol level              |
| 4939             | 306                    | 18             | 9.73                    | 0.0078  | 0.998                        | abnormal B cell morphology                               |
| 2452             | 506                    | 25             | 15                      | 0.0080  | 0.998                        | abnormal antigen presenting cell physiology              |
| 180              | 162                    | 12             | 5.67                    | 0.0082  | 0.998                        | abnormal circulating cholesterol level                   |
| 3053             | 5                      | 2              | 0.18                    | 0.0086  | 0.998                        | delayed tooth eruption                                   |
| 5178             | 93                     | 8              | 2.94                    | 0.0088  | 0.999                        | increased circulating cholesterol level                  |
| 4762             | 32                     | 4              | 0.84                    | 0.0088  | 0.999                        | increased anti-double stranded DNA antibody level        |
| 8781             | 17                     | 3              | 0.49                    | 0.0090  | 0.999                        | abnormal B cell apoptosis                                |
| 8246             | 880                    | 39             | 26.63                   | 0.0096  | 0.999                        | abnormal leukocyte morphology                            |
| 1685             | 44                     | 5              | 1.38                    | 0.0096  | 0.999                        | abnormal endoderm development                            |
| 716              | 886                    | 39             | 26.72                   | 0.0098  | 0.999                        | abnormal immune system cell morphology                   |
| 8706             | 36                     | 4              | 0.83                    | 0.0098  | 0.999                        | decreased interleukin-6 secretion                        |
| 2086             | 468                    | 23             | 13.83                   | 0.0104  | 1.000                        | abnormal extraembryonic tissue morphology                |
| 2459             | 322                    | 17             | 9.29                    | 0.0104  | 1.000                        | abnormal B cell physiology                               |
| 1552             | 74                     | 7              | 2.47                    | 0.0104  | 1.000                        | increased circulating triglyceride level                 |
| 5491             | 19                     | 3              | 0.45                    | 0.0104  | 1.000                        | pancreatic islet hyperplasia                             |
| 184              | 64                     | 7              | 2.63                    | 0.0108  | 1.000                        | abnormal circulating HDL cholesterol level               |
| 5145             | 16                     | 3              | 0.48                    | 0.0110  | 1.000                        | increased circulating VLDL cholesterol level             |
| 239              | 15                     | 3              | 0.52                    | 0.0110  | 1.000                        | absent common myeloid progenitor cells                   |
| 4557             | 7                      | 2              | 0.17                    | 0.0110  | 1.000                        | dilated allantois                                        |
| 5317             | 94                     | 8              | 3.05                    | 0.0114  | 1.000                        | increased triglyceride level                             |
| 3945             | 563                    | 26             | 16.39                   | 0.0116  | 1.000                        | abnormal lymphocyte physiology                           |
| 2458             | 237                    | 15             | 8.07                    | 0.0142  | 1.000                        | abnormal B cell number                                   |
| 2415             | 8                      | 2              | 0.19                    | 0.0142  | 1.000                        | abnormal neutrophil differentiation                      |
| 4229             | 18                     | 3              | 0.54                    | 0.0146  | 1.000                        | abnormal embryonic erythropoiesis                        |
| 5006             | 40                     | 5              | 1.57                    | 0.0148  | 1.000                        | abnormal osteoblast physiology                           |
| 5325             | 137                    | 10             | 4.54                    | 0.0152  | 1.000                        | abnormal renal glomerulus morphology                     |
| 3604             | 19                     | 4              | 1.05                    | 0.0156  | 1.000                        | single kidney                                            |
| 2190             | 29                     | 4              | 1.11                    | 0.0156  | 1.000                        | disorganized myocardium                                  |
| 175              | 17                     | 3              | 0.61                    | 0.0162  | 1.000                        | absent bone marrow cell                                  |
| 1289             | 15                     | 3              | 0.56                    | 0.0166  | 1.000                        | persistence of hyaloid capillary system                  |
| 8705             | 30                     | 3              | 0.59                    | 0.0168  | 1.000                        | increased interleukin-6 secretion                        |
| 2743             | 49                     | 5              | 1.5                     | 0.0170  | 1.000                        | glomerulonephritis                                       |
| 4794             | 43                     | 4              | 1.01                    | 0.0170  | 1.000                        | increased anti-nuclear antigen antibody level            |
| 1783             | 57                     | 5              | 1.49                    | 0.0170  | 1.000                        | decreased white adipose tissue amount                    |
| 8907             | 8                      | 2              | 0.22                    | 0.0172  | 1.000                        | decreased total fat pad weight                           |

|      |      |    |       |        |       |                                                                |
|------|------|----|-------|--------|-------|----------------------------------------------------------------|
| 2429 | 1137 | 47 | 34.54 | 0.0176 | 1.000 | abnormal blood cell morphology/development                     |
| 9112 | 20   | 3  | 0.6   | 0.0176 | 1.000 | abnormal pancreatic beta cell mass                             |
| 1802 | 31   | 4  | 1.1   | 0.0180 | 1.000 | arrested B cell differentiation                                |
| 4796 | 10   | 2  | 0.22  | 0.0182 | 1.000 | increased anti-histone antibody level                          |
| 5330 | 50   | 6  | 2.25  | 0.0184 | 1.000 | cardiomyopathy                                                 |
| 1602 | 9    | 2  | 0.24  | 0.0186 | 1.000 | impaired myelopoiesis                                          |
| 183  | 19   | 3  | 0.62  | 0.0188 | 1.000 | decreased circulating LDL cholesterol level                    |
| 8560 | 42   | 4  | 1.02  | 0.0190 | 1.000 | increased tumor necrosis factor secretion                      |
| 2718 | 73   | 5  | 1.52  | 0.0192 | 1.000 | abnormal inner cell mass                                       |
| 8556 | 92   | 7  | 2.79  | 0.0194 | 1.000 | abnormal tumor necrosis factor secretion                       |
| 6208 | 232  | 14 | 7.66  | 0.0202 | 1.000 | lethality throughout fetal growth and development              |
| 3643 | 14   | 3  | 0.84  | 0.0202 | 1.000 | spleen atrophy                                                 |
| 2144 | 220  | 13 | 7.02  | 0.0204 | 1.000 | abnormal B cell differentiation                                |
| 3947 | 175  | 12 | 6.28  | 0.0206 | 1.000 | abnormal cholesterol level                                     |
| 248  | 9    | 2  | 0.24  | 0.0208 | 1.000 | macrocytosis                                                   |
| 9814 | 10   | 2  | 0.25  | 0.0210 | 1.000 | increased prostaglandin level                                  |
| 8209 | 40   | 4  | 1.1   | 0.0212 | 1.000 | decreased pre-B cell number                                    |
| 8762 | 943  | 37 | 26.35 | 0.0218 | 1.000 | embryonic lethality                                            |
| 2451 | 215  | 12 | 6.4   | 0.0218 | 1.000 | abnormal macrophage physiology                                 |
| 1556 | 30   | 4  | 1.09  | 0.0218 | 1.000 | increased circulating HDL cholesterol level                    |
| 8195 | 315  | 17 | 9.97  | 0.0220 | 1.000 | abnormal antigen presenting cell morphology                    |
| 2123 | 1123 | 46 | 34.22 | 0.0222 | 1.000 | abnormal hematopoiesis                                         |
| 5350 | 73   | 5  | 1.64  | 0.0222 | 1.000 | increased susceptibility to autoimmune disorder                |
| 136  | 26   | 3  | 0.62  | 0.0234 | 1.000 | abnormal microglial cell morphology                            |
| 4111 | 15   | 3  | 0.66  | 0.0234 | 1.000 | abnormal coronary artery morphology                            |
| 5278 | 181  | 12 | 6.45  | 0.0236 | 1.000 | abnormal cholesterol homeostasis                               |
| 8813 | 21   | 3  | 0.64  | 0.0238 | 1.000 | decreased common myeloid progenitor cell number                |
| 8247 | 785  | 33 | 23.12 | 0.0246 | 1.000 | abnormal mononuclear leukocyte morphology                      |
| 3884 | 46   | 4  | 1.15  | 0.0250 | 1.000 | decreased macrophage cell number                               |
| 5495 | 39   | 4  | 1.11  | 0.0250 | 1.000 | abnormal macrophage recruitment                                |
| 119  | 23   | 3  | 0.69  | 0.0252 | 1.000 | abnormal tooth eruption                                        |
| 4771 | 12   | 2  | 0.26  | 0.0252 | 1.000 | increased anti-single stranded DNA antibody level              |
| 521  | 162  | 11 | 5.64  | 0.0256 | 1.000 | abnormal kidney cortex                                         |
| 3141 | 74   | 7  | 2.96  | 0.0258 | 1.000 | cardiac fibrosis                                               |
| 3057 | 16   | 3  | 0.74  | 0.0262 | 1.000 | abnormal epicardium morphology                                 |
| 181  | 38   | 4  | 1.17  | 0.0268 | 1.000 | abnormal circulating LDL cholesterol level                     |
| 2465 | 22   | 3  | 0.65  | 0.0268 | 1.000 | abnormal eosinophil physiology                                 |
| 4368 | 8    | 2  | 0.28  | 0.0270 | 1.000 | abnormal stria vascularis vasculature morphology               |
| 3982 | 106  | 8  | 3.56  | 0.0282 | 1.000 | increased cholesterol level                                    |
| 872  | 36   | 6  | 2.52  | 0.0282 | 1.000 | abnormal cerebellum external granule cell layer morphology     |
| 5496 | 26   | 3  | 0.67  | 0.0294 | 1.000 | impaired macrophage recruitment                                |
| 3020 | 4    | 2  | 0.56  | 0.0298 | 1.000 | decreased circulating chloride level                           |
| 1983 | 24   | 4  | 1.31  | 0.0304 | 1.000 | abnormal olfactory system physiology                           |
| 9171 | 27   | 3  | 0.72  | 0.0306 | 1.000 | enlarged pancreatic islets                                     |
| 2414 | 512  | 23 | 15.33 | 0.0308 | 1.000 | abnormal myeloblast morphology/development                     |
| 2620 | 63   | 5  | 1.78  | 0.0310 | 1.000 | abnormal monocyte morphology                                   |
| 576  | 4    | 2  | 0.36  | 0.0318 | 1.000 | clubfoot                                                       |
| 5243 | 6    | 2  | 0.33  | 0.0328 | 1.000 | hemothorax                                                     |
| 9113 | 9    | 2  | 0.29  | 0.0330 | 1.000 | increased pancreatic beta cell mass                            |
| 3949 | 238  | 13 | 7.45  | 0.0332 | 1.000 | abnormal circulating lipid level                               |
| 3725 | 53   | 4  | 1.27  | 0.0332 | 1.000 | increased autoantibody level                                   |
| 2827 | 147  | 10 | 5.18  | 0.0348 | 1.000 | abnormal renal corpuscle morphology                            |
| 1614 | 544  | 27 | 18.84 | 0.0358 | 1.000 | abnormal blood vessel morphology                               |
| 2210 | 310  | 14 | 8.43  | 0.0362 | 1.000 | abnormal sex determination                                     |
| 6135 | 9    | 2  | 0.31  | 0.0364 | 1.000 | arterial stenosis                                              |
| 2837 | 10   | 2  | 0.32  | 0.0364 | 1.000 | dystrophic cardiac calcinosis                                  |
| 3898 | 22   | 4  | 1.41  | 0.0380 | 1.000 | abnormal QRS complex                                           |
| 2887 | 18   | 3  | 0.83  | 0.0380 | 1.000 | decreased susceptibility to pharmacologically induced seizures |
| 1378 | 8    | 2  | 0.35  | 0.0382 | 1.000 | abnormal ejaculation                                           |
| 2425 | 155  | 8  | 3.83  | 0.0388 | 1.000 | altered susceptibility to autoimmune disorder                  |
| 1689 | 36   | 3  | 0.76  | 0.0392 | 1.000 | incomplete somite formation                                    |
| 1360 | 23   | 4  | 1.45  | 0.0394 | 1.000 | abnormal social investigation                                  |
| 6032 | 31   | 4  | 1.42  | 0.0396 | 1.000 | abnormal ureteric bud morphology                               |
| 186  | 36   | 4  | 1.43  | 0.0406 | 1.000 | decreased circulating HDL cholesterol level                    |
| 2818 | 10   | 2  | 0.34  | 0.0408 | 1.000 | abnormal dentin morphology                                     |
| 1354 | 10   | 2  | 0.33  | 0.0414 | 1.000 | increased aggression towards males                             |
| 4985 | 28   | 3  | 0.78  | 0.0416 | 1.000 | decreased osteoclast cell number                               |
| 2191 | 219  | 12 | 6.95  | 0.0420 | 1.000 | abnormal artery morphology                                     |
| 8210 | 46   | 4  | 1.32  | 0.0424 | 1.000 | increased mature B cell number                                 |
| 5387 | 1591 | 60 | 48.49 | 0.0426 | 1.000 | immune system phenotype                                        |
| 6382 | 37   | 4  | 1.4   | 0.0426 | 1.000 | abnormal lung epithelium morphology                            |

|      |      |    |       |        |       |                                                      |
|------|------|----|-------|--------|-------|------------------------------------------------------|
| 2065 | 162  | 13 | 7.89  | 0.0428 | 1.000 | abnormal fear/anxiety-related behavior               |
| 5146 | 17   | 2  | 0.32  | 0.0444 | 1.000 | decreased circulating VLDL cholesterol level         |
| 4957 | 91   | 5  | 2     | 0.0452 | 1.000 | abnormal blastocyst morphology                       |
| 8720 | 31   | 4  | 1.47  | 0.0454 | 1.000 | impaired neutrophil migration                        |
| 2419 | 304  | 15 | 9.39  | 0.0468 | 1.000 | abnormal innate immunity                             |
| 2127 | 890  | 41 | 31.7  | 0.0474 | 1.000 | abnormal cardiovascular system morphology            |
| 6203 | 8    | 2  | 0.38  | 0.0476 | 1.000 | eye hemorrhage                                       |
| 5412 | 13   | 2  | 0.36  | 0.0478 | 1.000 | vascular stenosis                                    |
| 5460 | 501  | 22 | 15.12 | 0.0482 | 1.000 | abnormal leukopoiesis                                |
| 1844 | 190  | 9  | 4.68  | 0.0482 | 1.000 | autoimmune response                                  |
| 4965 | 22   | 2  | 0.35  | 0.0482 | 1.000 | inner cell mass degeneration                         |
| 8782 | 13   | 2  | 0.39  | 0.0488 | 1.000 | increased B cell apoptosis                           |
| 8248 | 226  | 11 | 6.29  | 0.0496 | 1.000 | abnormal mononuclear phagocyte morphology            |
| 1675 | 74   | 5  | 2.01  | 0.0498 | 1.000 | abnormal ectoderm development                        |
| 2333 | 10   | 2  | 0.37  | 0.0498 | 1.000 | abnormal lung compliance                             |
| 2444 | 363  | 16 | 10.3  | 0.0508 | 1.000 | abnormal T cell physiology                           |
| 523  | 72   | 5  | 2.04  | 0.0518 | 1.000 | cortical renal glomerulopathies                      |
| 1711 | 263  | 12 | 7.18  | 0.0520 | 1.000 | abnormal placenta morphology                         |
| 5005 | 191  | 9  | 4.75  | 0.0520 | 1.000 | abnormal self tolerance                              |
| 5000 | 194  | 9  | 4.81  | 0.0538 | 1.000 | abnormal immune tolerance                            |
| 4986 | 56   | 5  | 2.18  | 0.0540 | 1.000 | abnormal osteoblast morphology                       |
| 8181 | 15   | 2  | 0.38  | 0.0540 | 1.000 | increased marginal zone B cell number                |
| 4264 | 15   | 2  | 0.41  | 0.0542 | 1.000 | abnormal extraembryonic tissue physiology            |
| 2396 | 1276 | 49 | 39.36 | 0.0552 | 1.000 | abnormal hematopoietic system morphology/development |
| 9768 | 62   | 4  | 1.44  | 0.0552 | 1.000 | impaired somite development                          |
| 2445 | 471  | 21 | 14.49 | 0.0556 | 1.000 | abnormal mononuclear leukocyte differentiation       |
| 4029 | 16   | 2  | 0.39  | 0.0556 | 1.000 | spontaneous chromosome breakage                      |
| 2461 | 144  | 8  | 4.13  | 0.0564 | 1.000 | increased immunoglobulin level                       |
| 8662 | 22   | 2  | 0.38  | 0.0564 | 1.000 | abnormal interleukin-12 secretion                    |
| 1726 | 59   | 4  | 1.5   | 0.0576 | 1.000 | abnormal allantois morphology                        |
| 8082 | 82   | 6  | 2.76  | 0.0578 | 1.000 | increased single-positive T cell number              |
| 2909 | 19   | 3  | 0.95  | 0.0580 | 1.000 | abnormal adrenal gland physiology                    |
| 2024 | 16   | 2  | 0.41  | 0.0584 | 1.000 | T cell derived lymphoma                              |
| 1698 | 383  | 16 | 10.32 | 0.0590 | 1.000 | decreased embryo size                                |
| 1712 | 136  | 7  | 3.56  | 0.0592 | 1.000 | abnormal placenta development                        |
| 3722 | 10   | 2  | 0.41  | 0.0596 | 1.000 | absent ureter                                        |
| 5397 | 1320 | 50 | 40.52 | 0.0602 | 1.000 | hematopoietic system phenotype                       |
| 3106 | 28   | 4  | 1.58  | 0.0606 | 1.000 | abnormal fear-related response                       |
| 217  | 681  | 29 | 21.57 | 0.0612 | 1.000 | abnormal leukocyte cell number                       |
| 48   | 33   | 4  | 1.56  | 0.0612 | 1.000 | abnormal stria vascularis                            |
| 5069 | 71   | 5  | 2.13  | 0.0614 | 1.000 | abnormal NK cell physiology                          |
| 237  | 494  | 23 | 16.48 | 0.0630 | 1.000 | decreased blood cell number                          |
| 2798 | 8    | 2  | 0.45  | 0.0638 | 1.000 | abnormal active avoidance behavior                   |
| 2403 | 55   | 4  | 1.53  | 0.0638 | 1.000 | abnormal pre-B cell morphology                       |
| 1984 | 19   | 3  | 0.97  | 0.0640 | 1.000 | abnormal olfaction                                   |
| 2490 | 261  | 12 | 7.31  | 0.0646 | 1.000 | abnormal immunoglobulin level                        |
| 8081 | 184  | 10 | 5.74  | 0.0650 | 1.000 | abnormal single-positive T cell number               |
| 5322 | 43   | 4  | 1.52  | 0.0658 | 1.000 | abnormal serotonin level                             |
| 2619 | 669  | 27 | 20.01 | 0.0662 | 1.000 | abnormal lymphocyte morphology                       |
| 8125 | 35   | 3  | 0.96  | 0.0666 | 1.000 | abnormal dendritic cell number                       |
| 5095 | 116  | 7  | 3.57  | 0.0668 | 1.000 | decreased T cell proliferation                       |
| 5179 | 79   | 6  | 3.02  | 0.0676 | 1.000 | decreased circulating cholesterol level              |
| 8482 | 13   | 2  | 0.45  | 0.0680 | 1.000 | decreased spleen germinal center number              |
| 1697 | 388  | 16 | 10.57 | 0.0684 | 1.000 | abnormal embryo size                                 |
| 2118 | 349  | 16 | 10.93 | 0.0688 | 1.000 | abnormal lipid homeostasis                           |
| 8250 | 356  | 15 | 9.93  | 0.0696 | 1.000 | abnormal myeloid leukocyte morphology                |
| 1547 | 312  | 15 | 10.06 | 0.0696 | 1.000 | abnormal lipid level                                 |
| 2462 | 154  | 9  | 5.17  | 0.0696 | 1.000 | abnormal granulocyte physiology                      |
| 2492 | 36   | 3  | 0.96  | 0.0696 | 1.000 | decreased IgE level                                  |
| 8559 | 134  | 7  | 3.63  | 0.0698 | 1.000 | abnormal interferon-gamma secretion                  |
| 1674 | 167  | 8  | 4.36  | 0.0700 | 1.000 | abnormal triploblastic development                   |
| 4057 | 16   | 2  | 0.45  | 0.0704 | 1.000 | thin myocardial compact layer                        |
| 4989 | 17   | 2  | 0.46  | 0.0708 | 1.000 | decreased osteoblast cell number                     |
| 5017 | 189  | 11 | 6.82  | 0.0710 | 1.000 | decreased B cell number                              |
| 2401 | 463  | 20 | 14.14 | 0.0730 | 1.000 | abnormal lymphopoiesis                               |
| 187  | 166  | 9  | 5.24  | 0.0734 | 1.000 | abnormal triglyceride level                          |
| 5584 | 110  | 7  | 3.72  | 0.0734 | 1.000 | abnormal enzyme/coenzyme activity                    |
| 1695 | 171  | 8  | 4.45  | 0.0734 | 1.000 | abnormal gastrulation                                |
| 2275 | 17   | 2  | 0.47  | 0.0740 | 1.000 | abnormal type II pneumocyte morphology               |
| 2736 | 22   | 3  | 1     | 0.0750 | 1.000 | abnormal nociception after inflammation              |
| 1718 | 188  | 10 | 5.97  | 0.0752 | 1.000 | abnormal yolk sac morphology                         |

|      |      |    |       |        |       |                                                  |
|------|------|----|-------|--------|-------|--------------------------------------------------|
| 685  | 1110 | 43 | 34.63 | 0.0754 | 1.000 | abnormal immune system morphology                |
| 5090 | 52   | 4  | 1.61  | 0.0760 | 1.000 | increased double-negative T cell number          |
| 8973 | 20   | 2  | 0.46  | 0.0768 | 1.000 | decreased erythroid progenitor cell number       |
| 1781 | 119  | 6  | 2.95  | 0.0772 | 1.000 | abnormal white adipose tissue amount             |
| 8215 | 68   | 5  | 2.33  | 0.0784 | 1.000 | decreased immature B cell number                 |
| 8469 | 306  | 14 | 9.37  | 0.0788 | 1.000 | abnormal protein level                           |
| 1672 | 1018 | 38 | 30.16 | 0.0794 | 1.000 | abnormal embryogenesis/ development              |
| 9657 | 38   | 3  | 1.01  | 0.0794 | 1.000 | failure of chorioallantoic fusion                |
| 5380 | 1018 | 38 | 30.16 | 0.0794 | 1.000 | embryogenesis phenotype                          |
| 2836 | 36   | 3  | 1.04  | 0.0806 | 1.000 | abnormal chorion morphology                      |
| 4987 | 35   | 3  | 1.04  | 0.0806 | 1.000 | abnormal osteoblast cell number                  |
| 3871 | 31   | 3  | 1.03  | 0.0806 | 1.000 | abnormal myelin sheath morphology                |
| 260  | 218  | 12 | 7.67  | 0.0808 | 1.000 | abnormal angiogenesis                            |
| 249  | 197  | 11 | 7.02  | 0.0814 | 1.000 | abnormal blood vessel physiology                 |
| 8713 | 175  | 8  | 4.6   | 0.0824 | 1.000 | abnormal cytokine level                          |
| 8074 | 51   | 4  | 1.67  | 0.0832 | 1.000 | increased CD4-positive T cell number             |
| 2572 | 252  | 18 | 12.76 | 0.0842 | 1.000 | abnormal emotion/affect behavior                 |
| 4567 | 11   | 2  | 0.54  | 0.0844 | 1.000 | decreased myocardial fiber number                |
| 3137 | 49   | 5  | 2.4   | 0.0848 | 1.000 | abnormal impulse conducting system conduction    |
| 1790 | 1233 | 46 | 37.77 | 0.0850 | 1.000 | abnormal immune system physiology                |
| 3983 | 88   | 6  | 3.18  | 0.0850 | 1.000 | decreased cholesterol level                      |
| 6043 | 51   | 3  | 1.07  | 0.0852 | 1.000 | decreased apoptosis                              |
| 5456 | 35   | 3  | 1.05  | 0.0852 | 1.000 | weight gain                                      |
| 2833 | 60   | 4  | 1.73  | 0.0854 | 1.000 | increased heart weight                           |
| 2211 | 286  | 12 | 7.84  | 0.0860 | 1.000 | abnormal primary sex determination               |
| 1127 | 82   | 5  | 2.47  | 0.0860 | 1.000 | small ovary                                      |
| 2966 | 6    | 2  | 0.67  | 0.0860 | 1.000 | decreased circulating alkaline phosphatase level |
| 8251 | 289  | 12 | 7.74  | 0.0862 | 1.000 | abnormal phagocyte morphology                    |
| 5022 | 93   | 6  | 3.11  | 0.0866 | 1.000 | abnormal immature B cell morphology              |
| 528  | 12   | 2  | 0.53  | 0.0876 | 1.000 | delayed kidney development                       |
| 278  | 110  | 7  | 3.86  | 0.0880 | 1.000 | abnormal myocardial fiber morphology             |
| 3396 | 38   | 3  | 1.08  | 0.0884 | 1.000 | abnormal embryonic hematopoiesis                 |
| 5385 | 1189 | 53 | 44.23 | 0.0888 | 1.000 | cardiovascular system phenotype                  |
| 3461 | 19   | 3  | 1.17  | 0.0888 | 1.000 | abnormal response to novel object                |
| 2652 | 57   | 4  | 1.73  | 0.0892 | 1.000 | thin myocardial wall                             |
| 5646 | 16   | 3  | 1.2   | 0.0892 | 1.000 | abnormal pituitary gland physiology              |
| 221  | 486  | 22 | 16.34 | 0.0894 | 1.000 | decreased leukocyte cell number                  |
| 4951 | 97   | 6  | 3.19  | 0.0894 | 1.000 | abnormal spleen weight                           |
| 5164 | 227  | 11 | 7.07  | 0.0904 | 1.000 | abnormal response to injury                      |
| 8561 | 49   | 4  | 1.78  | 0.0910 | 1.000 | decreased tumor necrosis factor secretion        |
| 8037 | 495  | 20 | 14.61 | 0.0914 | 1.000 | abnormal T cell morphology                       |
| 8217 | 100  | 6  | 3.12  | 0.0916 | 1.000 | abnormal B cell activation                       |
| 8555 | 150  | 7  | 3.85  | 0.0918 | 1.000 | abnormal interferon secretion                    |
| 3191 | 11   | 2  | 0.55  | 0.0922 | 1.000 | abnormal cellular cholesterol metabolism         |
| 2435 | 227  | 11 | 6.97  | 0.0924 | 1.000 | abnormal effector T cell morphology              |
| 2398 | 694  | 27 | 20.77 | 0.0930 | 1.000 | abnormal bone marrow cell morphology/development |
| 3087 | 16   | 2  | 0.54  | 0.0930 | 1.000 | absent allantois                                 |
| 2145 | 332  | 14 | 9.5   | 0.0936 | 1.000 | abnormal T cell differentiation                  |
| 351  | 44   | 3  | 1.08  | 0.0936 | 1.000 | increased cell proliferation                     |
| 2886 | 31   | 4  | 1.83  | 0.0938 | 1.000 | abnormal glutamate-mediated receptor currents    |
| 8484 | 12   | 2  | 0.54  | 0.0938 | 1.000 | decreased spleen germinal center size            |
| 4016 | 45   | 4  | 1.81  | 0.0940 | 1.000 | decreased bone mass                              |
| 8567 | 82   | 5  | 2.42  | 0.0942 | 1.000 | decreased interferon-gamma secretion             |
| 2918 | 34   | 5  | 2.64  | 0.0946 | 1.000 | abnormal paired-pulse facilitation               |
| 223  | 19   | 2  | 0.52  | 0.0952 | 1.000 | decreased monocyte cell number                   |
| 8414 | 25   | 3  | 1.12  | 0.0956 | 1.000 | abnormal spatial reference memory                |
| 3881 | 219  | 12 | 7.94  | 0.0970 | 1.000 | abnormal nephron morphology                      |
| 9593 | 12   | 2  | 0.55  | 0.0970 | 1.000 | absent chorion                                   |
| 1413 | 88   | 9  | 5.63  | 0.0974 | 1.000 | abnormal response to new environment             |
| 1798 | 17   | 2  | 0.54  | 0.0974 | 1.000 | impaired macrophage phagocytosis                 |
| 321  | 26   | 2  | 0.53  | 0.0980 | 1.000 | increased bone marrow cell number                |
| 8208 | 33   | 3  | 1.13  | 0.0982 | 1.000 | decreased pro-B cell number                      |
| 1417 | 54   | 6  | 3.36  | 0.0982 | 1.000 | decreased exploration in new environment         |
| 4952 | 64   | 4  | 1.79  | 0.0992 | 1.000 | increased spleen weight                          |
| 8143 | 22   | 3  | 1.14  | 0.0994 | 1.000 | abnormal dendrite morphology                     |
| 4769 | 18   | 2  | 0.54  | 0.0996 | 1.000 | abnormal synaptic vesicle morphology             |
| 527  | 60   | 5  | 2.53  | 0.1006 | 1.000 | abnormal kidney development                      |
| 2434 | 20   | 2  | 0.55  | 0.1006 | 1.000 | abnormal T-helper 2 cell morphology              |
| 2397 | 22   | 3  | 1.22  | 0.1014 | 1.000 | abnormal bone marrow morphology                  |
| 9698 | 30   | 3  | 1.16  | 0.1014 | 1.000 | heart hemorrhage                                 |
| 5374 | 1733 | 65 | 55.89 | 0.1018 | 1.000 | lethality-prenatal/perinatal                     |

|      |     |    |       |        |       |                                                           |
|------|-----|----|-------|--------|-------|-----------------------------------------------------------|
| 2989 | 90  | 6  | 3.28  | 0.1018 | 1.000 | small kidney                                              |
| 2100 | 103 | 6  | 3.23  | 0.1026 | 1.000 | abnormal tooth morphology                                 |
| 8127 | 24  | 2  | 0.54  | 0.1032 | 1.000 | decreased dendritic cell number                           |
| 5030 | 16  | 2  | 0.56  | 0.1046 | 1.000 | absent amnion                                             |
| 2407 | 79  | 5  | 2.52  | 0.1052 | 1.000 | abnormal double-negative T cell morphology                |
| 3941 | 7   | 2  | 0.58  | 0.1060 | 1.000 | abnormal skin development                                 |
| 5070 | 42  | 3  | 1.17  | 0.1066 | 1.000 | impaired NK cell cytotoxicity                             |
| 4091 | 9   | 2  | 0.61  | 0.1070 | 1.000 | abnormal Z lines                                          |
| 8111 | 23  | 2  | 0.58  | 0.1084 | 1.000 | abnormal granulocyte differentiation                      |
| 2084 | 326 | 13 | 8.8   | 0.1086 | 1.000 | abnormal developmental patterning                         |
| 8552 | 42  | 3  | 1.2   | 0.1088 | 1.000 | abnormal circulating tumor necrosis factor level          |
| 2270 | 125 | 8  | 4.86  | 0.1090 | 1.000 | abnormal respiratory alveoli morphology                   |
| 3179 | 61  | 4  | 1.85  | 0.1092 | 1.000 | decreased platelet cell number                            |
| 2446 | 171 | 8  | 4.84  | 0.1094 | 1.000 | abnormal macrophage morphology                            |
| 6414 | 24  | 2  | 0.57  | 0.1096 | 1.000 | decreased T cell apoptosis                                |
| 3085 | 27  | 2  | 0.57  | 0.1098 | 1.000 | abnormal egg cylinder morphology                          |
| 9748 | 54  | 4  | 1.86  | 0.1098 | 1.000 | abnormal behavioral response to addictive substance       |
| 182  | 20  | 2  | 0.56  | 0.1104 | 1.000 | increased circulating LDL cholesterol level               |
| 4076 | 46  | 4  | 1.86  | 0.1116 | 1.000 | abnormal vitelline vascular remodeling                    |
| 109  | 43  | 4  | 1.93  | 0.1120 | 1.000 | abnormal parietal bone morphology                         |
| 8073 | 128 | 7  | 4.11  | 0.1128 | 1.000 | abnormal CD4-positive T cell number                       |
| 4086 | 11  | 2  | 0.62  | 0.1130 | 1.000 | absent heartbeat                                          |
| 172  | 94  | 5  | 2.58  | 0.1140 | 1.000 | abnormal bone marrow cell number                          |
| 8835 | 179 | 8  | 4.94  | 0.1154 | 1.000 | abnormal intercellular signaling peptide or protein level |
| 5463 | 100 | 5  | 2.62  | 0.1158 | 1.000 | abnormal CD4-positive T cell physiology                   |
| 5015 | 181 | 9  | 5.71  | 0.1176 | 1.000 | increased T cell number                                   |
| 2088 | 527 | 20 | 15.06 | 0.1184 | 1.000 | abnormal embryonic growth/weight/body size                |
| 2953 | 22  | 2  | 0.59  | 0.1184 | 1.000 | thick ventricular wall                                    |
| 1800 | 288 | 12 | 8.22  | 0.1220 | 1.000 | abnormal humoral immune response                          |
| 162  | 22  | 2  | 0.61  | 0.1220 | 1.000 | lordosis                                                  |
| 8701 | 23  | 2  | 0.6   | 0.1224 | 1.000 | abnormal interleukin-5 secretion                          |
| 4321 | 22  | 2  | 0.64  | 0.1234 | 1.000 | short sternum                                             |
| 9085 | 9   | 2  | 0.74  | 0.1244 | 1.000 | abnormal uterine horn morphology                          |
| 2970 | 133 | 6  | 3.4   | 0.1246 | 1.000 | abnormal white adipose tissue morphology                  |
| 333  | 63  | 4  | 1.91  | 0.1246 | 1.000 | decreased bone marrow cell number                         |
| 4853 | 91  | 5  | 2.74  | 0.1256 | 1.000 | abnormal ovary size                                       |
| 5345 | 46  | 3  | 1.26  | 0.1266 | 1.000 | abnormal circulating corticosterone level                 |
| 2328 | 7   | 2  | 0.73  | 0.1268 | 1.000 | abnormal airway resistance                                |
| 717  | 516 | 21 | 16.13 | 0.1270 | 1.000 | abnormal lymphocyte cell number                           |
| 5461 | 47  | 3  | 1.24  | 0.1280 | 1.000 | abnormal dendritic cell morphology                        |
| 3944 | 24  | 2  | 0.64  | 0.1282 | 1.000 | abnormal T cell subpopulation ratio                       |
| 4608 | 26  | 2  | 0.64  | 0.1286 | 1.000 | abnormal cervical axis morphology                         |
| 8698 | 67  | 4  | 1.91  | 0.1294 | 1.000 | abnormal interleukin-4 secretion                          |
| 1942 | 18  | 2  | 0.64  | 0.1294 | 1.000 | abnormal lung capacity                                    |
| 8700 | 37  | 3  | 1.26  | 0.1300 | 1.000 | decreased interleukin-4 secretion                         |
| 3909 | 76  | 4  | 1.95  | 0.1304 | 1.000 | increased eating behavior                                 |
| 3107 | 96  | 9  | 5.98  | 0.1308 | 1.000 | abnormal response to novelty                              |
| 5416 | 243 | 11 | 7.56  | 0.1310 | 1.000 | abnormal circulating protein level                        |
| 2493 | 96  | 5  | 2.71  | 0.1314 | 1.000 | increased IgG level                                       |
| 5448 | 105 | 5  | 2.7   | 0.1316 | 1.000 | abnormal energy balance                                   |
| 2738 | 7   | 2  | 0.68  | 0.1316 | 1.000 | hyperresponsive to tactile stimuli                        |
| 5266 | 307 | 14 | 10.07 | 0.1336 | 1.000 | abnormal metabolism                                       |
| 5007 | 117 | 7  | 4.35  | 0.1336 | 1.000 | abnormal bone density                                     |
| 8554 | 20  | 2  | 0.69  | 0.1340 | 1.000 | decreased circulating tumor necrosis factor level         |
| 5565 | 66  | 5  | 2.82  | 0.1356 | 1.000 | increased blood urea nitrogen level                       |
| 2576 | 20  | 2  | 0.67  | 0.1390 | 1.000 | abnormal enamel morphology                                |
| 2824 | 49  | 3  | 1.28  | 0.1392 | 1.000 | abnormal chorioallantoic fusion                           |
| 298  | 11  | 2  | 0.69  | 0.1392 | 1.000 | absent endocardial cushion                                |
| 8078 | 42  | 3  | 1.31  | 0.1398 | 1.000 | increased CD8-positive T cell number                      |
| 3222 | 21  | 2  | 0.69  | 0.1404 | 1.000 | increased cardiomyocyte apoptosis                         |
| 1634 | 169 | 9  | 5.98  | 0.1408 | 1.000 | internal hemorrhage                                       |
| 3460 | 21  | 3  | 1.39  | 0.1412 | 1.000 | decreased fear-related response                           |
| 2085 | 623 | 23 | 18.25 | 0.1416 | 1.000 | abnormal embryonic tissue morphology                      |
| 1415 | 21  | 3  | 1.4   | 0.1434 | 1.000 | increased exploration in new environment                  |
| 1859 | 85  | 5  | 2.82  | 0.1434 | 1.000 | kidney inflammation                                       |
| 6264 | 22  | 2  | 0.68  | 0.1436 | 1.000 | decreased systolic blood pressure                         |
| 2295 | 46  | 4  | 2.09  | 0.1438 | 1.000 | abnormal pulmonary circulation                            |
| 2885 | 12  | 2  | 0.69  | 0.1440 | 1.000 | abnormal AMPA-mediated synaptic currents                  |
| 5013 | 260 | 11 | 7.69  | 0.1462 | 1.000 | increased lymphocyte cell number                          |
| 8168 | 17  | 2  | 0.67  | 0.1464 | 1.000 | decreased B-1a cell number                                |
| 2432 | 165 | 8  | 5.23  | 0.1472 | 1.000 | abnormal CD4-positive T cell morphology                   |

|      |      |    |       |        |       |                                                          |
|------|------|----|-------|--------|-------|----------------------------------------------------------|
| 2494 | 65   | 4  | 2.08  | 0.1484 | 1.000 | increased IgM level                                      |
| 1745 | 26   | 2  | 0.7   | 0.1486 | 1.000 | increased circulating corticosterone level               |
| 1258 | 106  | 6  | 3.63  | 0.1502 | 1.000 | decreased body length                                    |
| 6354 | 14   | 2  | 0.7   | 0.1506 | 1.000 | abnormal fourth branchial arch artery morphology         |
| 3942 | 70   | 5  | 2.86  | 0.1512 | 1.000 | abnormal urinary system development                      |
| 9811 | 21   | 2  | 0.73  | 0.1512 | 1.000 | abnormal prostaglandin level                             |
| 3018 | 10   | 2  | 0.81  | 0.1516 | 1.000 | abnormal circulating chloride level                      |
| 2699 | 31   | 3  | 1.39  | 0.1518 | 1.000 | abnormal vitreous body                                   |
| 6340 | 15   | 2  | 0.71  | 0.1530 | 1.000 | abnormal fourth branchial arch morphology                |
| 2286 | 23   | 2  | 0.71  | 0.1534 | 1.000 | cryptorchism                                             |
| 1353 | 20   | 2  | 0.71  | 0.1536 | 1.000 | increased aggression towards mice                        |
| 4890 | 28   | 2  | 0.7   | 0.1540 | 1.000 | decreased energy expenditure                             |
| 3229 | 132  | 7  | 4.42  | 0.1546 | 1.000 | abnormal vitelline vasculature                           |
| 4917 | 19   | 2  | 0.69  | 0.1546 | 1.000 | abnormal T cell selection                                |
| 8719 | 36   | 3  | 1.42  | 0.1566 | 1.000 | impaired neutrophil recruitment                          |
| 8752 | 66   | 4  | 2.16  | 0.1568 | 1.000 | abnormal tumor necrosis factor level                     |
| 6387 | 365  | 15 | 11.34 | 0.1584 | 1.000 | abnormal T cell number                                   |
| 255  | 29   | 2  | 0.72  | 0.1586 | 1.000 | vasculature congestion                                   |
| 8288 | 25   | 2  | 0.71  | 0.1600 | 1.000 | abnormal adrenal cortex morphology                       |
| 4720 | 98   | 5  | 2.88  | 0.1600 | 1.000 | abnormal platelet morphology                             |
| 1691 | 24   | 2  | 0.72  | 0.1612 | 1.000 | abnormal somite shape                                    |
| 1077 | 76   | 6  | 3.71  | 0.1622 | 1.000 | abnormal spinal nerve morphology                         |
| 564  | 49   | 4  | 2.15  | 0.1622 | 1.000 | syndactyly                                               |
| 3690 | 28   | 2  | 0.73  | 0.1634 | 1.000 | abnormal glial cell physiology                           |
| 1544 | 795  | 36 | 30.55 | 0.1656 | 1.000 | abnormal cardiovascular system physiology                |
| 3894 | 6    | 2  | 0.76  | 0.1656 | 1.000 | abnormal Purkinje cell innervation                       |
| 228  | 100  | 5  | 2.92  | 0.1664 | 1.000 | abnormal thrombopoiesis                                  |
| 222  | 40   | 2  | 0.72  | 0.1668 | 1.000 | decreased neutrophil cell number                         |
| 5025 | 332  | 12 | 8.82  | 0.1672 | 1.000 | abnormal response to infection                           |
| 6204 | 106  | 4  | 2.17  | 0.1682 | 1.000 | embryonic lethality before implantation                  |
| 5634 | 7    | 2  | 0.84  | 0.1682 | 1.000 | decreased circulating sodium level                       |
| 3484 | 21   | 3  | 1.45  | 0.1698 | 1.000 | abnormal channel response                                |
| 3408 | 25   | 2  | 0.75  | 0.1698 | 1.000 | increased width of hypertrophic chondrocyte zone         |
| 2022 | 87   | 5  | 3.11  | 0.1702 | 1.000 | lymphoma                                                 |
| 1899 | 18   | 3  | 1.49  | 0.1712 | 1.000 | absent long term depression                              |
| 1722 | 56   | 3  | 1.42  | 0.1718 | 1.000 | pale yolk sac                                            |
| 218  | 395  | 15 | 11.5  | 0.1724 | 1.000 | increased leukocyte cell number                          |
| 2151 | 308  | 12 | 8.83  | 0.1732 | 1.000 | abnormal neural tube morphology/development              |
| 5166 | 58   | 3  | 1.45  | 0.1732 | 1.000 | decreased susceptibility to injury                       |
| 8172 | 26   | 2  | 0.75  | 0.1750 | 1.000 | abnormal follicular B cell morphology                    |
| 3221 | 27   | 2  | 0.78  | 0.1756 | 1.000 | abnormal cardiomyocyte apoptosis                         |
| 2799 | 29   | 3  | 1.5   | 0.1760 | 1.000 | abnormal passive avoidance behavior                      |
| 2063 | 320  | 22 | 18.05 | 0.1780 | 1.000 | abnormal learning/memory/conditioning                    |
| 2828 | 26   | 2  | 0.77  | 0.1784 | 1.000 | abnormal renal glomerular capsule                        |
| 8866 | 56   | 3  | 1.5   | 0.1790 | 1.000 | chromosomal instability                                  |
| 2439 | 33   | 2  | 0.77  | 0.1798 | 1.000 | abnormal plasma cell morphology                          |
| 5294 | 298  | 15 | 11.69 | 0.1808 | 1.000 | abnormal heart ventricle morphology                      |
| 4978 | 35   | 3  | 1.48  | 0.1812 | 1.000 | decreased B-1 B cell number                              |
| 3974 | 19   | 2  | 0.79  | 0.1812 | 1.000 | abnormal endocardium morphology                          |
| 1980 | 22   | 2  | 0.78  | 0.1814 | 1.000 | abnormal chemically-elicited antinociception             |
| 8722 | 26   | 2  | 0.77  | 0.1814 | 1.000 | abnormal chemokine secretion                             |
| 3963 | 51   | 3  | 1.46  | 0.1818 | 1.000 | abnormal corticosterone level                            |
| 520  | 39   | 4  | 2.3   | 0.1832 | 1.000 | absent kidney                                            |
| 1764 | 1713 | 63 | 56.59 | 0.1838 | 1.000 | abnormal homeostasis                                     |
| 5016 | 408  | 17 | 13.41 | 0.1848 | 1.000 | decreased lymphocyte cell number                         |
| 5018 | 286  | 12 | 9.06  | 0.1850 | 1.000 | decreased T cell number                                  |
| 5265 | 77   | 5  | 3.1   | 0.1860 | 1.000 | abnormal blood urea nitrogen level                       |
| 8588 | 88   | 4  | 2.26  | 0.1862 | 1.000 | abnormal circulating interleukin level                   |
| 2412 | 152  | 6  | 3.89  | 0.1862 | 1.000 | increased susceptibility to bacterial infection          |
| 2687 | 123  | 6  | 3.89  | 0.1864 | 1.000 | oligozoospermia                                          |
| 133  | 25   | 2  | 0.8   | 0.1866 | 1.000 | abnormal long bone metaphysis morphology                 |
| 5587 | 27   | 2  | 0.78  | 0.1870 | 1.000 | abnormal Meckel's cartilage morphology                   |
| 3355 | 21   | 2  | 0.8   | 0.1870 | 1.000 | decreased ovulation frequency                            |
| 5264 | 23   | 2  | 0.81  | 0.1878 | 1.000 | glomerulosclerosis                                       |
| 3930 | 25   | 2  | 0.8   | 0.1884 | 1.000 | abnormal tooth hard tissue morphology                    |
| 929  | 126  | 6  | 3.9   | 0.1888 | 1.000 | open neural tube                                         |
| 2273 | 24   | 2  | 0.8   | 0.1890 | 1.000 | abnormal respiratory alveolar epithelial cell morphology |
| 9170 | 48   | 3  | 1.54  | 0.1898 | 1.000 | abnormal pancreatic islet size                           |
| 4856 | 22   | 2  | 0.81  | 0.1906 | 1.000 | decreased ovary weight                                   |
| 8164 | 21   | 2  | 0.8   | 0.1914 | 1.000 | abnormal B-1a B cell morphology                          |
| 3956 | 1322 | 58 | 51.81 | 0.1918 | 1.000 | abnormal body size                                       |

|      |      |    |       |        |       |                                                               |
|------|------|----|-------|--------|-------|---------------------------------------------------------------|
| 6410 | 50   | 3  | 1.52  | 0.1932 | 1.000 | abnormal common myeloid progenitor cell morphology            |
| 1286 | 129  | 6  | 3.93  | 0.1938 | 1.000 | abnormal eye development                                      |
| 6009 | 57   | 5  | 3.11  | 0.1938 | 1.000 | abnormal neuronal migration                                   |
| 5329 | 238  | 12 | 9.18  | 0.1960 | 1.000 | abnormal cardiac muscle morphology                            |
| 5394 | 60   | 4  | 2.33  | 0.1974 | 1.000 | taste/olfaction phenotype                                     |
| 9858 | 34   | 2  | 0.82  | 0.1978 | 1.000 | abnormal cellular extravasation                               |
| 4056 | 25   | 2  | 0.83  | 0.1984 | 1.000 | abnormal myocardial compact layer morphology                  |
| 8854 | 7    | 2  | 0.84  | 0.2026 | 1.000 | bleb                                                          |
| 4854 | 25   | 2  | 0.84  | 0.2038 | 1.000 | abnormal ovary weight                                         |
| 691  | 223  | 10 | 7.41  | 0.2038 | 1.000 | enlarged spleen                                               |
| 2182 | 52   | 3  | 1.58  | 0.2040 | 1.000 | abnormal astrocyte morphology                                 |
| 5376 | 2005 | 73 | 66.6  | 0.2054 | 1.000 | homeostasis/metabolism phenotype                              |
| 5608 | 24   | 2  | 0.86  | 0.2056 | 1.000 | cardiac interstitial fibrosis                                 |
| 1625 | 89   | 6  | 4.02  | 0.2060 | 1.000 | cardiac hypertrophy                                           |
| 1489 | 37   | 5  | 3.25  | 0.2064 | 1.000 | decreased startle reflex                                      |
| 3795 | 261  | 12 | 9.21  | 0.2076 | 1.000 | abnormal bone structure                                       |
| 259  | 267  | 12 | 9.18  | 0.2080 | 1.000 | abnormal vascular development                                 |
| 2792 | 45   | 3  | 1.6   | 0.2080 | 1.000 | abnormal retinal vasculature morphology                       |
| 2148 | 101  | 4  | 2.4   | 0.2088 | 1.000 | hypersensitivity                                              |
| 1256 | 120  | 6  | 4.01  | 0.2092 | 1.000 | abnormal body length                                          |
| 9749 | 27   | 2  | 0.86  | 0.2094 | 1.000 | enhanced behavioral response to addictive substance           |
| 1739 | 15   | 2  | 0.87  | 0.2114 | 1.000 | abnormal adrenal gland secretion                              |
| 2919 | 17   | 3  | 1.74  | 0.2116 | 1.000 | enhanced paired-pulse facilitation                            |
| 1116 | 275  | 10 | 7.48  | 0.2136 | 1.000 | small gonad                                                   |
| 8515 | 47   | 3  | 1.61  | 0.2136 | 1.000 | thin retinal outer nuclear layer                              |
| 702  | 79   | 4  | 2.39  | 0.2158 | 1.000 | enlarged lymph nodes                                          |
| 715  | 83   | 4  | 2.38  | 0.2162 | 1.000 | decreased thymocyte number                                    |
| 5154 | 32   | 2  | 0.87  | 0.2164 | 1.000 | increased B cell proliferation                                |
| 8688 | 38   | 3  | 1.61  | 0.2168 | 1.000 | decreased interleukin-2 secretion                             |
| 3674 | 31   | 2  | 0.89  | 0.2190 | 1.000 | oxidative stress                                              |
| 445  | 66   | 4  | 2.43  | 0.2214 | 1.000 | short snout                                                   |
| 5238 | 18   | 2  | 0.95  | 0.2214 | 1.000 | increased brain size                                          |
| 4983 | 53   | 3  | 1.67  | 0.2258 | 1.000 | abnormal osteoclast cell number                               |
| 4180 | 33   | 2  | 0.92  | 0.2272 | 1.000 | failure of initiation of embryo turning                       |
| 3059 | 54   | 3  | 1.66  | 0.2292 | 1.000 | decreased insulin secretion                                   |
| 1449 | 269  | 18 | 14.94 | 0.2296 | 1.000 | abnormal learning/ memory                                     |
| 1719 | 51   | 3  | 1.66  | 0.2304 | 1.000 | absent vitelline blood vessels                                |
| 2314 | 42   | 3  | 1.69  | 0.2308 | 1.000 | abnormal respiratory mechanics                                |
| 5094 | 187  | 7  | 5     | 0.2324 | 1.000 | abnormal T cell proliferation                                 |
| 5079 | 27   | 2  | 0.9   | 0.2326 | 1.000 | defective cytotoxic T cell cytolysis                          |
| 2972 | 113  | 7  | 5.03  | 0.2346 | 1.000 | abnormal cardiac muscle contractility                         |
| 2835 | 34   | 2  | 0.92  | 0.2346 | 1.000 | abnormal cranial suture morphology                            |
| 343  | 45   | 3  | 1.7   | 0.2350 | 1.000 | altered response to myocardial infarction                     |
| 2998 | 90   | 5  | 3.34  | 0.2354 | 1.000 | abnormal bone remodeling                                      |
| 4509 | 33   | 3  | 1.7   | 0.2368 | 1.000 | abnormal pelvic girdle bone morphology                        |
| 5092 | 78   | 4  | 2.51  | 0.2370 | 1.000 | decreased double-positive T cell number                       |
| 4883 | 35   | 2  | 0.93  | 0.2414 | 1.000 | abnormal blood vessel healing                                 |
| 1314 | 26   | 2  | 0.97  | 0.2418 | 1.000 | corneal opacity                                               |
| 4787 | 54   | 3  | 1.71  | 0.2436 | 1.000 | abnormal dorsal aorta morphology                              |
| 62   | 34   | 2  | 0.95  | 0.2438 | 1.000 | increased bone density                                        |
| 5466 | 37   | 2  | 0.96  | 0.2448 | 1.000 | abnormal T-helper 2 physiology                                |
| 2406 | 257  | 9  | 6.91  | 0.2468 | 1.000 | increased susceptibility to infection                         |
| 5293 | 113  | 6  | 4.23  | 0.2470 | 1.000 | impaired glucose tolerance                                    |
| 1869 | 42   | 2  | 0.95  | 0.2478 | 1.000 | pancreas inflammation                                         |
| 149  | 24   | 2  | 0.96  | 0.2494 | 1.000 | abnormal scapula morphology                                   |
| 1601 | 59   | 3  | 1.73  | 0.2504 | 1.000 | abnormal myelopoiesis                                         |
| 5450 | 99   | 4  | 2.55  | 0.2506 | 1.000 | abnormal energy expenditure                                   |
| 2169 | 1089 | 39 | 34.97 | 0.2514 | 1.000 | no abnormal phenotype detected                                |
| 3131 | 21   | 2  | 1     | 0.2514 | 1.000 | increased erythrocyte cell number                             |
| 1462 | 50   | 4  | 2.59  | 0.2516 | 1.000 | abnormal avoidance learning behavior                          |
| 8750 | 49   | 2  | 0.94  | 0.2520 | 1.000 | abnormal interferon level                                     |
| 1636 | 32   | 3  | 1.79  | 0.2520 | 1.000 | irregular heartbeat                                           |
| 790  | 17   | 2  | 1     | 0.2522 | 1.000 | abnormal stratification in cerebral cortex                    |
| 5358 | 57   | 3  | 1.73  | 0.2530 | 1.000 | abnormal incisor morphology                                   |
| 5616 | 42   | 2  | 0.96  | 0.2530 | 1.000 | decreased susceptibility to type IV hypersensitivity reaction |
| 1957 | 16   | 2  | 0.99  | 0.2552 | 1.000 | apnea                                                         |
| 4196 | 634  | 21 | 17.85 | 0.2588 | 1.000 | abnormal prenatal growth/weight/body size                     |
| 2463 | 104  | 5  | 3.48  | 0.2588 | 1.000 | abnormal neutrophil physiology                                |
| 266  | 631  | 26 | 22.69 | 0.2592 | 1.000 | abnormal heart morphology                                     |
| 8472 | 60   | 3  | 1.77  | 0.2604 | 1.000 | abnormal spleen secondary B follicle morphology               |
| 8488 | 27   | 2  | 0.99  | 0.2604 | 1.000 | abnormal semicircular canal ampulla morphology                |

|      |      |    |       |        |       |                                               |
|------|------|----|-------|--------|-------|-----------------------------------------------|
| 8171 | 137  | 7  | 5.17  | 0.2612 | 1.000 | abnormal mature B cell morphology             |
| 2224 | 344  | 14 | 11.52 | 0.2612 | 1.000 | abnormal spleen size                          |
| 1486 | 85   | 8  | 6.2   | 0.2616 | 1.000 | abnormal startle reflex                       |
| 3075 | 39   | 2  | 1     | 0.2616 | 1.000 | altered response to CNS ischemic injury       |
| 4976 | 45   | 3  | 1.79  | 0.2628 | 1.000 | abnormal B-1 B cell number                    |
| 4940 | 45   | 3  | 1.79  | 0.2628 | 1.000 | abnormal B-1 B cell morphology                |
| 9357 | 106  | 8  | 6.14  | 0.2630 | 1.000 | abnormal seizure response to inducing agent   |
| 1716 | 110  | 5  | 3.46  | 0.2636 | 1.000 | abnormal placenta labyrinth morphology        |
| 516  | 428  | 19 | 16.26 | 0.2640 | 1.000 | abnormal urinary system morphology            |
| 8076 | 34   | 2  | 1.01  | 0.2640 | 1.000 | abnormal CD4-positive T cell differentiation  |
| 63   | 84   | 5  | 3.52  | 0.2642 | 1.000 | decreased bone density                        |
| 2427 | 38   | 3  | 1.81  | 0.2652 | 1.000 | disproportionate dwarf                        |
| 3186 | 38   | 2  | 1.02  | 0.2660 | 1.000 | abnormal redox activity                       |
| 5407 | 30   | 3  | 1.8   | 0.2664 | 1.000 | hyperalgesia                                  |
| 1265 | 1208 | 53 | 48.61 | 0.2670 | 1.000 | decreased body size                           |
| 501  | 26   | 2  | 1.01  | 0.2672 | 1.000 | abnormal digestive secretion                  |
| 1828 | 199  | 7  | 5.28  | 0.2678 | 1.000 | abnormal T cell activation                    |
| 3911 | 49   | 3  | 1.79  | 0.2680 | 1.000 | increased drinking behavior                   |
| 2062 | 157  | 11 | 8.9   | 0.2684 | 1.000 | abnormal conditioning behavior                |
| 2873 | 1093 | 39 | 35.25 | 0.2688 | 1.000 | normal phenotype                              |
| 5244 | 26   | 2  | 1.01  | 0.2688 | 1.000 | hemopericardium                               |
| 8788 | 14   | 2  | 1.02  | 0.2688 | 1.000 | abnormal fetal cardiomyocyte morphology       |
| 3410 | 80   | 4  | 2.63  | 0.2698 | 1.000 | abnormal artery development                   |
| 2531 | 37   | 2  | 1.01  | 0.2710 | 1.000 | type I hypersensitivity reaction              |
| 4046 | 49   | 2  | 1.01  | 0.2716 | 1.000 | abnormal mitosis                              |
| 3231 | 81   | 4  | 2.64  | 0.2740 | 1.000 | abnormal placenta vasculature                 |
| 8188 | 24   | 2  | 1.04  | 0.2742 | 1.000 | abnormal transitional stage B cell morphology |
| 3809 | 30   | 2  | 1.03  | 0.2746 | 1.000 | abnormal hair shaft morphology                |
| 4956 | 22   | 2  | 1.08  | 0.2748 | 1.000 | decreased thymus weight                       |
| 5465 | 37   | 2  | 1.04  | 0.2750 | 1.000 | abnormal T-helper 1 physiology                |
| 738  | 128  | 8  | 6.25  | 0.2752 | 1.000 | impaired muscle contractility                 |
| 2327 | 54   | 4  | 2.72  | 0.2752 | 1.000 | abnormal respiratory function                 |
| 5432 | 52   | 3  | 1.82  | 0.2770 | 1.000 | abnormal pro-B cell morphology                |
| 639  | 67   | 4  | 2.68  | 0.2784 | 1.000 | abnormal adrenal gland morphology             |
| 952  | 109  | 5  | 3.56  | 0.2790 | 1.000 | abnormal CNS glial cell morphology            |
| 854  | 68   | 7  | 5.37  | 0.2792 | 1.000 | abnormal cerebellum development               |
| 1488 | 25   | 2  | 1.06  | 0.2802 | 1.000 | increased startle reflex                      |
| 2135 | 399  | 18 | 15.46 | 0.2806 | 1.000 | abnormal kidney morphology                    |
| 5667 | 106  | 4  | 2.69  | 0.2818 | 1.000 | abnormal circulating leptin level             |
| 1496 | 9    | 2  | 1.09  | 0.2830 | 1.000 | audiogenic seizures                           |
| 8500 | 41   | 2  | 1.04  | 0.2836 | 1.000 | increased IgG2a level                         |
| 2633 | 31   | 3  | 1.87  | 0.2856 | 1.000 | persistent truncus arteriosus                 |
| 5150 | 69   | 5  | 3.57  | 0.2856 | 1.000 | cachexia                                      |
| 4000 | 13   | 2  | 1.07  | 0.2860 | 1.000 | impaired passive avoidance behavior           |
| 3446 | 27   | 2  | 1.07  | 0.2872 | 1.000 | renal hypoplasia                              |
| 1146 | 345  | 12 | 9.99  | 0.2880 | 1.000 | abnormal testis morphology                    |
| 1208 | 20   | 2  | 1.06  | 0.2894 | 1.000 | blistering                                    |
| 709  | 37   | 2  | 1.08  | 0.2898 | 1.000 | enlarged thymus                               |
| 948  | 23   | 2  | 1.07  | 0.2904 | 1.000 | nonconvulsive seizures                        |
| 6104 | 26   | 2  | 1.09  | 0.2904 | 1.000 | abnormal tectum morphology                    |
| 6103 | 26   | 2  | 1.09  | 0.2904 | 1.000 | abnormal midbrain roof plate morphology       |
| 899  | 26   | 2  | 1.09  | 0.2904 | 1.000 | abnormal corpora quadrigemina morphology      |
| 3921 | 107  | 6  | 4.49  | 0.2910 | 1.000 | abnormal heart left ventricle morphology      |
| 8595 | 46   | 2  | 1.07  | 0.2912 | 1.000 | abnormal circulating interleukin-6 level      |
| 1219 | 43   | 2  | 1.1   | 0.2922 | 1.000 | thickened epidermis                           |
| 3054 | 38   | 2  | 1.06  | 0.2934 | 1.000 | spina bifida                                  |
| 2417 | 120  | 5  | 3.62  | 0.2960 | 1.000 | abnormal megakaryocyte morphology             |
| 5655 | 22   | 2  | 1.1   | 0.2970 | 1.000 | increased aggression                          |
| 4090 | 23   | 2  | 1.1   | 0.2978 | 1.000 | abnormal sarcomere morphology                 |
| 4392 | 65   | 3  | 1.94  | 0.2990 | 1.000 | abnormal CD8-positive T cell physiology       |
| 2557 | 180  | 10 | 8.18  | 0.2994 | 1.000 | abnormal social/conspecific interaction       |
| 5602 | 45   | 2  | 1.11  | 0.3004 | 1.000 | decreased angiogenesis                        |
| 5140 | 87   | 5  | 3.64  | 0.3008 | 1.000 | decreased cardiac muscle contractility        |
| 1688 | 136  | 5  | 3.67  | 0.3018 | 1.000 | abnormal somite development                   |
| 6361 | 64   | 3  | 1.94  | 0.3020 | 1.000 | abnormal female germ cell morphology          |
| 1125 | 64   | 3  | 1.94  | 0.3020 | 1.000 | abnormal oocyte morphology                    |
| 5165 | 48   | 3  | 1.92  | 0.3034 | 1.000 | increased susceptibility to injury            |
| 1362 | 140  | 8  | 6.43  | 0.3034 | 1.000 | abnormal anxiety-related response             |
| 116  | 37   | 2  | 1.1   | 0.3034 | 1.000 | abnormal tooth development                    |
| 1410 | 28   | 3  | 1.91  | 0.3036 | 1.000 | head bobbing                                  |
| 1730 | 170  | 6  | 4.56  | 0.3062 | 1.000 | embryonic growth arrest                       |



|      |      |    |       |        |       |                                                   |
|------|------|----|-------|--------|-------|---------------------------------------------------|
| 4936 | 22   | 2  | 1.11  | 0.3068 | 1.000 | abnormal ureteric bud branching morphogenesis     |
| 5010 | 136  | 6  | 4.6   | 0.3076 | 1.000 | abnormal CD8-positive T cell morphology           |
| 565  | 23   | 2  | 1.11  | 0.3080 | 1.000 | oligodactyly                                      |
| 4028 | 44   | 2  | 1.12  | 0.3090 | 1.000 | chromosome breakage                               |
| 2673 | 213  | 7  | 5.51  | 0.3092 | 1.000 | abnormal sperm number                             |
| 3733 | 37   | 3  | 1.97  | 0.3096 | 1.000 | abnormal retinal inner nuclear layer morphology   |
| 272  | 140  | 6  | 4.59  | 0.3100 | 1.000 | abnormal aorta morphology                         |
| 3049 | 54   | 2  | 1.12  | 0.3104 | 1.000 | abnormal lumbar vertebrae morphology              |
| 1700 | 106  | 4  | 2.85  | 0.3144 | 1.000 | abnormal embryo turning                           |
| 4874 | 37   | 2  | 1.14  | 0.3156 | 1.000 | abnormal timing of postnatal eyelid opening       |
| 8801 | 42   | 2  | 1.12  | 0.3176 | 1.000 | abnormal erythroid progenitor cell morphology     |
| 2183 | 60   | 3  | 1.98  | 0.3184 | 1.000 | gliosis                                           |
| 6138 | 34   | 2  | 1.14  | 0.3198 | 1.000 | congestive heart failure                          |
| 2644 | 65   | 3  | 2     | 0.3200 | 1.000 | decreased circulating triglyceride level          |
| 3720 | 176  | 7  | 5.59  | 0.3212 | 1.000 | abnormal neural tube closure                      |
| 5379 | 935  | 31 | 28.46 | 0.3226 | 1.000 | endocrine/exocrine gland phenotype                |
| 4231 | 52   | 3  | 2     | 0.3226 | 1.000 | abnormal calcium ion homeostasis                  |
| 350  | 225  | 7  | 5.55  | 0.3244 | 1.000 | abnormal cell proliferation                       |
| 8770 | 119  | 6  | 4.69  | 0.3258 | 1.000 | decreased survivor rate                           |
| 8497 | 35   | 2  | 1.17  | 0.3262 | 1.000 | decreased IgG2b level                             |
| 5378 | 1961 | 74 | 70.24 | 0.3270 | 1.000 | growth/size phenotype                             |
| 2413 | 124  | 5  | 3.77  | 0.3274 | 1.000 | abnormal megakaryocyte progenitor cell morphology |
| 4816 | 33   | 2  | 1.17  | 0.3276 | 1.000 | abnormal class switch recombination               |
| 8572 | 22   | 3  | 2.02  | 0.3282 | 1.000 | abnormal Purkinje cell dendrite morphology        |
| 245  | 310  | 12 | 10.25 | 0.3284 | 1.000 | abnormal erythropoiesis                           |
| 2423 | 33   | 2  | 1.17  | 0.3292 | 1.000 | abnormal mast cell physiology                     |
| 2212 | 49   | 2  | 1.17  | 0.3292 | 1.000 | abnormal secondary sex determination              |
| 1683 | 49   | 2  | 1.19  | 0.3300 | 1.000 | absent mesoderm                                   |
| 9644 | 82   | 5  | 3.79  | 0.3314 | 1.000 | uremia                                            |
| 5153 | 90   | 4  | 2.9   | 0.3314 | 1.000 | abnormal B cell proliferation                     |
| 2499 | 40   | 2  | 1.18  | 0.3314 | 1.000 | chronic inflammation                              |
| 4508 | 34   | 2  | 1.18  | 0.3316 | 1.000 | abnormal pectoral girdle morphology               |
| 2064 | 211  | 12 | 10.3  | 0.3318 | 1.000 | seizures                                          |
| 2497 | 45   | 2  | 1.18  | 0.3326 | 1.000 | increased IgE level                               |
| 5431 | 39   | 2  | 1.21  | 0.3338 | 1.000 | decreased oocyte cell number                      |
| 2124 | 280  | 11 | 9.4   | 0.3358 | 1.000 | abnormal red blood cell                           |
| 3634 | 159  | 7  | 5.68  | 0.3368 | 1.000 | abnormal glial cell morphology                    |
| 2441 | 201  | 7  | 5.69  | 0.3390 | 1.000 | abnormal granulocyte morphology                   |
| 8751 | 120  | 4  | 2.94  | 0.3398 | 1.000 | abnormal interleukin level                        |
| 288  | 177  | 8  | 6.59  | 0.3398 | 1.000 | abnormal pericardium morphology                   |
| 3984 | 287  | 10 | 8.44  | 0.3422 | 1.000 | embryonic growth retardation                      |
| 5217 | 64   | 3  | 2.08  | 0.3424 | 1.000 | abnormal pancreatic beta cell morphology          |
| 9745 | 175  | 10 | 8.63  | 0.3426 | 1.000 | abnormal behavioral response to xenobiotic        |
| 1212 | 48   | 2  | 1.21  | 0.3430 | 1.000 | skin lesions                                      |
| 2230 | 43   | 2  | 1.24  | 0.3474 | 1.000 | abnormal primitive streak formation               |
| 2625 | 36   | 3  | 2.08  | 0.3482 | 1.000 | heart left ventricle hypertrophy                  |
| 8043 | 47   | 2  | 1.23  | 0.3494 | 1.000 | abnormal NK cell number                           |
| 3675 | 57   | 4  | 3     | 0.3500 | 1.000 | kidney cysts                                      |
| 76   | 130  | 6  | 4.8   | 0.3504 | 1.000 | abnormal calvaria morphology                      |
| 689  | 473  | 17 | 15.21 | 0.3508 | 1.000 | abnormal spleen morphology                        |
| 8077 | 117  | 5  | 3.89  | 0.3510 | 1.000 | abnormal CD8-positive T cell number               |
| 220  | 39   | 2  | 1.23  | 0.3512 | 1.000 | increased monocyte cell number                    |
| 5184 | 30   | 2  | 1.22  | 0.3524 | 1.000 | abnormal circulating progesterone level           |
| 1845 | 553  | 18 | 16.2  | 0.3532 | 1.000 | abnormal inflammatory response                    |
| 274  | 187  | 9  | 7.66  | 0.3534 | 1.000 | enlarged heart                                    |
| 8071 | 34   | 2  | 1.22  | 0.3540 | 1.000 | absent B cells                                    |
| 2795 | 30   | 2  | 1.23  | 0.3552 | 1.000 | dilated cardiomyopathy                            |
| 3149 | 25   | 2  | 1.25  | 0.3554 | 1.000 | abnormal tectorial membrane morphology            |
| 8874 | 96   | 5  | 3.95  | 0.3566 | 1.000 | decreased physiological sensitivity to xenobiotic |
| 4945 | 25   | 2  | 1.25  | 0.3570 | 1.000 | abnormal bone resorption                          |
| 2534 | 57   | 2  | 1.24  | 0.3582 | 1.000 | type IV hypersensitivity reaction                 |
| 1906 | 21   | 2  | 1.27  | 0.3612 | 1.000 | increased dopamine level                          |
| 2061 | 48   | 3  | 2.14  | 0.3640 | 1.000 | abnormal aggression-related behavior              |
| 3731 | 66   | 3  | 2.16  | 0.3642 | 1.000 | abnormal retinal outer nuclear layer morphology   |
| 653  | 462  | 15 | 13.4  | 0.3648 | 1.000 | abnormal sex gland morphology                     |
| 2672 | 33   | 2  | 1.27  | 0.3654 | 1.000 | abnormal branchial arch artery morphology         |
| 8415 | 118  | 6  | 4.91  | 0.3656 | 1.000 | abnormal neurite morphology                       |
| 432  | 397  | 15 | 13.5  | 0.3658 | 1.000 | abnormal head morphology                          |
| 4007 | 28   | 2  | 1.27  | 0.3658 | 1.000 | abnormal lung vasculature morphology              |
| 5277 | 24   | 2  | 1.26  | 0.3658 | 1.000 | abnormal brainstem morphology                     |
| 1242 | 48   | 2  | 1.25  | 0.3660 | 1.000 | hyperkeratosis                                    |

|      |      |    |       |        |       |                                                    |
|------|------|----|-------|--------|-------|----------------------------------------------------|
| 1898 | 47   | 4  | 3.06  | 0.3670 | 1.000 | abnormal long term depression                      |
| 3743 | 306  | 12 | 10.62 | 0.3682 | 1.000 | abnormal facial morphology                         |
| 9642 | 1171 | 40 | 37.76 | 0.3726 | 1.000 | abnormal blood homeostasis                         |
| 2651 | 27   | 2  | 1.27  | 0.3732 | 1.000 | abnormal sciatic nerve                             |
| 1776 | 17   | 2  | 1.29  | 0.3738 | 1.000 | abnormal circulating sodium level                  |
| 692  | 136  | 6  | 4.97  | 0.3744 | 1.000 | small spleen                                       |
| 5319 | 132  | 6  | 4.98  | 0.3776 | 1.000 | abnormal enzyme/ coenzyme level                    |
| 5029 | 40   | 2  | 1.29  | 0.3786 | 1.000 | abnormal amnion morphology                         |
| 5377 | 420  | 22 | 20.34 | 0.3792 | 1.000 | hearing/vestibular/ear phenotype                   |
| 3953 | 503  | 19 | 17.5  | 0.3796 | 1.000 | abnormal hormone level                             |
| 1147 | 247  | 8  | 6.88  | 0.3806 | 1.000 | small testis                                       |
| 334  | 81   | 3  | 2.24  | 0.3818 | 1.000 | decreased granulocyte number                       |
| 6319 | 42   | 2  | 1.32  | 0.3822 | 1.000 | abnormal epididymal fat pad morphology             |
| 6395 | 113  | 5  | 4.05  | 0.3830 | 1.000 | abnormal epiphyseal plate morphology               |
| 2602 | 55   | 2  | 1.31  | 0.3832 | 1.000 | abnormal eosinophil cell number                    |
| 2447 | 148  | 6  | 4.99  | 0.3832 | 1.000 | abnormal erythrocyte morphology                    |
| 4857 | 87   | 4  | 3.16  | 0.3836 | 1.000 | abnormal heart weight                              |
| 5620 | 172  | 10 | 8.8   | 0.3838 | 1.000 | abnormal muscle contractility                      |
| 5599 | 21   | 2  | 1.3   | 0.3860 | 1.000 | increased cardiac muscle contractility             |
| 5591 | 17   | 2  | 1.3   | 0.3866 | 1.000 | decreased vasodilation                             |
| 2164 | 307  | 12 | 10.76 | 0.3868 | 1.000 | abnormal gland physiology                          |
| 1363 | 93   | 5  | 4.12  | 0.3870 | 1.000 | increased anxiety-related response                 |
| 5384 | 990  | 31 | 29.16 | 0.3874 | 1.000 | cellular phenotype                                 |
| 1293 | 40   | 2  | 1.33  | 0.3882 | 1.000 | anophthalmia                                       |
| 2089 | 1522 | 60 | 57.69 | 0.3902 | 1.000 | abnormal postnatal growth/weight/body size         |
| 950  | 81   | 5  | 4.07  | 0.3904 | 1.000 | abnormal seizure response to pharmacological agent |
| 3140 | 35   | 2  | 1.34  | 0.3942 | 1.000 | dilated atria                                      |
| 9746 | 39   | 2  | 1.35  | 0.3946 | 1.000 | enhanced behavioral response to xenobiotic         |
| 1765 | 100  | 5  | 4.13  | 0.3946 | 1.000 | abnormal ion homeostasis                           |
| 2757 | 61   | 3  | 2.23  | 0.3946 | 1.000 | decreased vertical activity                        |
| 8566 | 59   | 2  | 1.35  | 0.3950 | 1.000 | increased interferon-gamma secretion               |
| 2356 | 59   | 3  | 2.25  | 0.3962 | 1.000 | abnormal spleen red pulp morphology                |
| 1778 | 47   | 2  | 1.36  | 0.3972 | 1.000 | abnormal brown adipose tissue amount               |
| 5382 | 562  | 21 | 19.54 | 0.3984 | 1.000 | craniofacial phenotype                             |
| 428  | 562  | 21 | 19.54 | 0.3984 | 1.000 | abnormal craniofacial morphology                   |
| 1364 | 48   | 3  | 2.27  | 0.3984 | 1.000 | decreased anxiety-related response                 |
| 208  | 91   | 4  | 3.2   | 0.3986 | 1.000 | decreased hematocrit                               |
| 1259 | 1030 | 43 | 41.15 | 0.3998 | 1.000 | abnormal body weight                               |
| 726  | 62   | 3  | 2.28  | 0.3998 | 1.000 | absent lymphocyte                                  |
| 4901 | 221  | 7  | 6.03  | 0.4008 | 1.000 | decreased male germ cell number                    |
| 2221 | 454  | 16 | 14.77 | 0.4020 | 1.000 | abnormal lymph organ size                          |
| 5031 | 87   | 3  | 2.26  | 0.4034 | 1.000 | abnormal trophoblast layer morphology              |
| 358  | 200  | 6  | 5.1   | 0.4050 | 1.000 | abnormal cell content/ morphology                  |
| 443  | 89   | 4  | 3.23  | 0.4058 | 1.000 | abnormal nose/snout morphology                     |
| 5404 | 93   | 4  | 3.22  | 0.4068 | 1.000 | abnormal axon morphology                           |
| 1260 | 164  | 6  | 5.14  | 0.4076 | 1.000 | increased body weight                              |
| 8686 | 68   | 3  | 2.32  | 0.4086 | 1.000 | abnormal interleukin-2 secretion                   |
| 4322 | 37   | 2  | 1.36  | 0.4098 | 1.000 | abnormal sternebra morphology                      |
| 3564 | 74   | 3  | 2.3   | 0.4102 | 1.000 | abnormal insulin secretion                         |
| 5674 | 39   | 3  | 2.32  | 0.4112 | 1.000 | abnormal outflow tract septation                   |
| 1126 | 188  | 7  | 6.13  | 0.4128 | 1.000 | abnormal ovary morphology                          |
| 2416 | 67   | 3  | 2.32  | 0.4130 | 1.000 | abnormal proerythroblast morphology                |
| 5291 | 178  | 7  | 6.13  | 0.4146 | 1.000 | abnormal glucose tolerance                         |
| 752  | 20   | 2  | 1.39  | 0.4152 | 1.000 | dystrophic muscle                                  |
| 1928 | 56   | 3  | 2.32  | 0.4174 | 1.000 | abnormal ovulation                                 |
| 3796 | 55   | 3  | 2.34  | 0.4178 | 1.000 | abnormal cortical bone morphology                  |
| 2706 | 141  | 6  | 5.2   | 0.4190 | 1.000 | abnormal kidney size                               |
| 5087 | 59   | 2  | 1.42  | 0.4192 | 1.000 | decreased acute inflammation                       |
| 5659 | 56   | 2  | 1.43  | 0.4196 | 1.000 | increased resistance to diet-induced obesity       |
| 3938 | 67   | 3  | 2.34  | 0.4200 | 1.000 | abnormal ear development                           |
| 5241 | 50   | 3  | 2.33  | 0.4206 | 1.000 | abnormal retinal ganglion layer morphology         |
| 5331 | 72   | 3  | 2.32  | 0.4208 | 1.000 | insulin resistance                                 |
| 5464 | 80   | 3  | 2.37  | 0.4218 | 1.000 | abnormal platelet physiology                       |
| 1793 | 306  | 9  | 8.09  | 0.4220 | 1.000 | altered susceptibility to infection                |
| 2408 | 104  | 4  | 3.34  | 0.4226 | 1.000 | abnormal double-positive T cell morphology         |
| 9358 | 13   | 2  | 1.42  | 0.4228 | 1.000 | environmentally induced seizures                   |
| 1932 | 50   | 2  | 1.44  | 0.4230 | 1.000 | abnormal spermiogenesis                            |
| 8428 | 20   | 2  | 1.41  | 0.4232 | 1.000 | abnormal spatial working memory                    |
| 8947 | 44   | 2  | 1.42  | 0.4242 | 1.000 | increased neuron number                            |
| 4953 | 36   | 2  | 1.42  | 0.4250 | 1.000 | decreased spleen weight                            |
| 3797 | 58   | 3  | 2.37  | 0.4252 | 1.000 | abnormal compact bone morphology                   |

|      |     |    |       |        |       |                                                                |
|------|-----|----|-------|--------|-------|----------------------------------------------------------------|
| 5312 | 42  | 2  | 1.44  | 0.4258 | 1.000 | pericardial effusion                                           |
| 4272 | 25  | 2  | 1.46  | 0.4260 | 1.000 | abnormal basement membrane morphology                          |
| 4889 | 58  | 2  | 1.45  | 0.4262 | 1.000 | increased energy expenditure                                   |
| 1264 | 167 | 6  | 5.25  | 0.4264 | 1.000 | increased body size                                            |
| 165  | 70  | 3  | 2.4   | 0.4264 | 1.000 | abnormal long bone hypertrophic chondrocyte zone               |
| 192  | 124 | 5  | 4.26  | 0.4284 | 1.000 | abnormal mineral level                                         |
| 5061 | 61  | 2  | 1.45  | 0.4294 | 1.000 | abnormal eosinophil morphology                                 |
| 5668 | 54  | 2  | 1.47  | 0.4302 | 1.000 | decreased circulating leptin level                             |
| 2925 | 432 | 17 | 15.98 | 0.4318 | 1.000 | abnormal cardiovascular development                            |
| 1119 | 322 | 12 | 11.05 | 0.4324 | 1.000 | abnormal female reproductive system morphology                 |
| 2081 | 721 | 28 | 26.9  | 0.4348 | 1.000 | perinatal lethality                                            |
| 4201 | 54  | 2  | 1.46  | 0.4348 | 1.000 | fetal growth retardation                                       |
| 3866 | 35  | 2  | 1.46  | 0.4352 | 1.000 | abnormal defecation                                            |
| 2668 | 22  | 2  | 1.44  | 0.4352 | 1.000 | abnormal circulating potassium level                           |
| 5669 | 55  | 2  | 1.47  | 0.4360 | 1.000 | increased circulating leptin level                             |
| 2804 | 19  | 2  | 1.44  | 0.4360 | 1.000 | abnormal motor learning                                        |
| 4859 | 27  | 2  | 1.47  | 0.4360 | 1.000 | abnormal synaptic plasticity                                   |
| 202  | 28  | 2  | 1.45  | 0.4370 | 1.000 | abnormal circulating alkaline phosphatase level                |
| 694  | 78  | 3  | 2.41  | 0.4374 | 1.000 | spleen hypoplasia                                              |
| 4954 | 34  | 2  | 1.46  | 0.4382 | 1.000 | abnormal thymus weight                                         |
| 3935 | 210 | 8  | 7.18  | 0.4384 | 1.000 | abnormal craniofacial development                              |
| 1322 | 44  | 2  | 1.48  | 0.4384 | 1.000 | abnormal iris morphology                                       |
| 1577 | 186 | 7  | 6.31  | 0.4390 | 1.000 | anemia                                                         |
| 3008 | 35  | 3  | 2.42  | 0.4390 | 1.000 | enhanced long term potentiation                                |
| 2111 | 164 | 6  | 5.33  | 0.4392 | 1.000 | abnormal tail morphology                                       |
| 2693 | 142 | 5  | 4.32  | 0.4398 | 1.000 | abnormal pancreas physiology                                   |
| 2906 | 63  | 4  | 3.36  | 0.4410 | 1.000 | increased susceptibility to pharmacologically induced seizures |
| 5621 | 890 | 28 | 26.96 | 0.4424 | 1.000 | abnormal cell physiology                                       |
| 2207 | 128 | 8  | 7.31  | 0.4446 | 1.000 | abnormal long term potentiation                                |
| 322  | 123 | 4  | 3.41  | 0.4458 | 1.000 | increased granulocyte number                                   |
| 9764 | 48  | 2  | 1.5   | 0.4498 | 1.000 | decreased sensitivity to induced morbidity/mortality           |
| 2753 | 52  | 2  | 1.49  | 0.4500 | 1.000 | dilated heart left ventricle                                   |
| 6357 | 89  | 4  | 3.44  | 0.4506 | 1.000 | abnormal circulating mineral level                             |
| 1502 | 50  | 2  | 1.5   | 0.4510 | 1.000 | abnormal circadian rhythm                                      |
| 2110 | 143 | 6  | 5.4   | 0.4516 | 1.000 | abnormal digit morphology                                      |
| 1182 | 30  | 2  | 1.48  | 0.4526 | 1.000 | lung hemorrhage                                                |
| 9205 | 392 | 12 | 11.23 | 0.4532 | 1.000 | abnormal internal male genitalia morphology                    |
| 8180 | 45  | 2  | 1.54  | 0.4538 | 1.000 | abnormal marginal zone B cell morphology                       |
| 5068 | 59  | 2  | 1.52  | 0.4540 | 1.000 | abnormal NK cell morphology                                    |
| 2069 | 365 | 14 | 13.27 | 0.4590 | 1.000 | abnormal eating/drinking behavior                              |
| 8496 | 47  | 2  | 1.52  | 0.4596 | 1.000 | decreased IgG2a level                                          |
| 1072 | 17  | 2  | 1.52  | 0.4598 | 1.000 | abnormal vestibulocochlear nerve morphology                    |
| 5351 | 96  | 3  | 2.52  | 0.4604 | 1.000 | decreased susceptibility to autoimmune disorder                |
| 1431 | 312 | 12 | 11.36 | 0.4620 | 1.000 | abnormal eating behavior                                       |
| 2703 | 120 | 5  | 4.46  | 0.4620 | 1.000 | abnormal renal tubule morphology                               |
| 5333 | 57  | 4  | 3.48  | 0.4632 | 1.000 | decreased heart rate                                           |
| 8211 | 110 | 5  | 4.44  | 0.4642 | 1.000 | decreased mature B cell number                                 |
| 1405 | 203 | 13 | 12.26 | 0.4654 | 1.000 | impaired coordination                                          |
| 440  | 44  | 2  | 1.55  | 0.4656 | 1.000 | domed skull                                                    |
| 5636 | 131 | 5  | 4.46  | 0.4666 | 1.000 | abnormal mineral homeostasis                                   |
| 2784 | 39  | 2  | 1.55  | 0.4668 | 1.000 | abnormal Sertoli cell morphology                               |
| 4200 | 100 | 3  | 2.53  | 0.4670 | 1.000 | decreased fetal size                                           |
| 1243 | 58  | 2  | 1.56  | 0.4670 | 1.000 | abnormal dermal layer morphology                               |
| 3111 | 75  | 2  | 1.55  | 0.4672 | 1.000 | abnormal nucleus morphology                                    |
| 9209 | 248 | 9  | 8.37  | 0.4676 | 1.000 | abnormal internal female genitalia morphology                  |
| 934  | 70  | 3  | 2.53  | 0.4678 | 1.000 | abnormal telencephalon development                             |
| 1216 | 153 | 5  | 4.49  | 0.4682 | 1.000 | abnormal epidermal layer morphology                            |
| 4994 | 32  | 2  | 1.58  | 0.4682 | 1.000 | abnormal brain wave pattern                                    |
| 2073 | 134 | 6  | 5.45  | 0.4688 | 1.000 | abnormal hair growth                                           |
| 1968 | 161 | 8  | 7.41  | 0.4694 | 1.000 | abnormal touch/ nociception                                    |
| 130  | 105 | 4  | 3.52  | 0.4694 | 1.000 | abnormal cancellous bone morphology                            |
| 8083 | 139 | 5  | 4.49  | 0.4700 | 1.000 | decreased single-positive T cell number                        |
| 88   | 44  | 2  | 1.56  | 0.4700 | 1.000 | short mandible                                                 |
| 3156 | 55  | 2  | 1.56  | 0.4708 | 1.000 | abnormal leukocyte migration                                   |
| 1806 | 56  | 2  | 1.58  | 0.4716 | 1.000 | decreased IgM level                                            |
| 5194 | 48  | 2  | 1.58  | 0.4728 | 1.000 | abnormal anterior uvea morphology                              |
| 701  | 116 | 4  | 3.49  | 0.4732 | 1.000 | abnormal lymph node size                                       |
| 2023 | 26  | 2  | 1.47  | 0.4736 | 1.000 | B cell derived lymphoma                                        |
| 3562 | 82  | 3  | 2.55  | 0.4762 | 1.000 | abnormal pancreatic beta cell physiology                       |
| 2269 | 65  | 3  | 2.57  | 0.4768 | 1.000 | muscular atrophy                                               |
| 2059 | 61  | 2  | 1.59  | 0.4770 | 1.000 | abnormal seminal vesicle morphology                            |

|      |     |    |       |        |       |                                                     |
|------|-----|----|-------|--------|-------|-----------------------------------------------------|
| 4271 | 174 | 7  | 6.54  | 0.4770 | 1.000 | abnormal paw/hand/foot morphology                   |
| 1297 | 88  | 3  | 2.55  | 0.4772 | 1.000 | microphthalmia                                      |
| 2551 | 153 | 5  | 4.54  | 0.4790 | 1.000 | abnormal blood coagulation                          |
| 9676 | 153 | 5  | 4.54  | 0.4790 | 1.000 | abnormal hemostasis                                 |
| 1876 | 56  | 2  | 1.59  | 0.4796 | 1.000 | decreased inflammatory response                     |
| 1648 | 268 | 8  | 7.53  | 0.4800 | 1.000 | abnormal apoptosis                                  |
| 74   | 164 | 7  | 6.52  | 0.4814 | 1.000 | abnormal neurocranium morphology                    |
| 6412 | 52  | 2  | 1.6   | 0.4816 | 1.000 | abnormal T cell apoptosis                           |
| 1183 | 30  | 2  | 1.58  | 0.4824 | 1.000 | overexpanded respiratory alveoli                    |
| 3651 | 32  | 2  | 1.61  | 0.4824 | 1.000 | abnormal axon outgrowth                             |
| 2694 | 84  | 3  | 2.57  | 0.4826 | 1.000 | abnormal pancreas secretion                         |
| 1663 | 406 | 15 | 14.48 | 0.4842 | 1.000 | abnormal digestive system physiology                |
| 1926 | 183 | 6  | 5.51  | 0.4844 | 1.000 | female infertility                                  |
| 8535 | 32  | 2  | 1.6   | 0.4854 | 1.000 | enlarged lateral ventricles                         |
| 609  | 201 | 6  | 5.6   | 0.4866 | 1.000 | abnormal liver physiology                           |
| 1931 | 84  | 3  | 2.59  | 0.4866 | 1.000 | abnormal oogenesis                                  |
| 3    | 350 | 12 | 11.52 | 0.4872 | 1.000 | abnormal adipose tissue morphology                  |
| 5375 | 352 | 12 | 11.54 | 0.4886 | 1.000 | adipose tissue phenotype                            |
| 2746 | 37  | 2  | 1.63  | 0.4902 | 1.000 | abnormal semilunar valve morphology                 |
| 1422 | 78  | 3  | 2.6   | 0.4906 | 1.000 | abnormal drinking behavior                          |
| 2460 | 166 | 5  | 4.62  | 0.4912 | 1.000 | decreased immunoglobulin level                      |
| 9198 | 405 | 12 | 11.53 | 0.4920 | 1.000 | abnormal male genitalia morphology                  |
| 1145 | 405 | 12 | 11.53 | 0.4920 | 1.000 | abnormal male reproductive system morphology        |
| 778  | 92  | 5  | 4.58  | 0.4920 | 1.000 | abnormal tract                                      |
| 3077 | 136 | 3  | 2.64  | 0.4924 | 1.000 | abnormal cell cycle                                 |
| 9208 | 253 | 9  | 8.53  | 0.4930 | 1.000 | abnormal female genitalia morphology                |
| 2115 | 270 | 10 | 9.63  | 0.4940 | 1.000 | abnormal skeleton extremities morphology            |
| 4849 | 264 | 8  | 7.6   | 0.4950 | 1.000 | abnormal testis size                                |
| 5318 | 86  | 3  | 2.65  | 0.4956 | 1.000 | decreased triglyceride level                        |
| 9538 | 62  | 3  | 2.6   | 0.4958 | 1.000 | abnormal synapse morphology                         |
| 2082 | 774 | 32 | 31.6  | 0.4960 | 1.000 | postnatal lethality                                 |
| 2357 | 149 | 5  | 4.62  | 0.4962 | 1.000 | abnormal spleen white pulp morphology               |
| 8470 | 81  | 3  | 2.62  | 0.4968 | 1.000 | abnormal spleen B cell follicle morphology          |
| 3711 | 40  | 2  | 1.63  | 0.4992 | 1.000 | pathological neovascularization                     |
| 1262 | 907 | 38 | 37.53 | 0.4994 | 1.000 | decreased body weight                               |
| 5332 | 58  | 2  | 1.67  | 0.5010 | 1.000 | abnormal amino acid level                           |
| 4982 | 82  | 3  | 2.67  | 0.5032 | 1.000 | abnormal osteoclast morphology                      |
| 857  | 43  | 5  | 4.6   | 0.5034 | 1.000 | abnormal cerebellar foliation                       |
| 1680 | 107 | 3  | 2.68  | 0.5060 | 1.000 | abnormal mesoderm development                       |
| 2745 | 34  | 2  | 1.67  | 0.5064 | 1.000 | abnormal atrioventricular valve morphology          |
| 1065 | 27  | 2  | 1.64  | 0.5094 | 1.000 | abnormal trigeminal nerve morphology                |
| 4198 | 107 | 3  | 2.71  | 0.5130 | 1.000 | abnormal fetal size                                 |
| 9964 | 45  | 5  | 4.65  | 0.5138 | 1.000 | abnormal cerebellum lobule morphology               |
| 1570 | 92  | 4  | 3.72  | 0.5176 | 1.000 | abnormal circulating enzyme level                   |
| 8056 | 32  | 2  | 1.67  | 0.5186 | 1.000 | abnormal retinal ganglion cell morphology           |
| 2697 | 91  | 3  | 2.72  | 0.5190 | 1.000 | abnormal eye size                                   |
| 2102 | 285 | 12 | 11.76 | 0.5198 | 1.000 | abnormal ear morphology                             |
| 830  | 174 | 6  | 5.76  | 0.5202 | 1.000 | abnormal diencephalon morphology                    |
| 5078 | 53  | 2  | 1.7   | 0.5202 | 1.000 | abnormal cytotoxic T cell physiology                |
| 2566 | 61  | 3  | 2.73  | 0.5254 | 1.000 | abnormal sexual interaction                         |
| 2362 | 58  | 2  | 1.75  | 0.5260 | 1.000 | abnormal spleen marginal zone morphology            |
| 3878 | 290 | 16 | 15.95 | 0.5266 | 1.000 | abnormal ear physiology                             |
| 1124 | 255 | 7  | 6.81  | 0.5266 | 1.000 | abnormal gametes                                    |
| 5023 | 57  | 2  | 1.73  | 0.5274 | 1.000 | abnormal wound healing                              |
| 2596 | 107 | 4  | 3.77  | 0.5280 | 1.000 | abnormal hematocrit                                 |
| 2209 | 252 | 7  | 6.81  | 0.5284 | 1.000 | decreased germ cell number                          |
| 8075 | 86  | 3  | 2.76  | 0.5286 | 1.000 | decreased CD4-positive T cell number                |
| 5334 | 128 | 4  | 3.78  | 0.5288 | 1.000 | abnormal fat pad morphology                         |
| 703  | 237 | 9  | 8.83  | 0.5302 | 1.000 | abnormal thymus morphology                          |
| 2359 | 58  | 2  | 1.73  | 0.5316 | 1.000 | abnormal spleen germinal center morphology          |
| 313  | 422 | 12 | 11.92 | 0.5318 | 1.000 | abnormal cell death                                 |
| 1429 | 58  | 2  | 1.74  | 0.5334 | 1.000 | dehydration                                         |
| 137  | 230 | 8  | 7.79  | 0.5342 | 1.000 | abnormal vertebrae morphology                       |
| 458  | 93  | 3  | 2.8   | 0.5352 | 1.000 | abnormal mandible morphology                        |
| 5169 | 88  | 2  | 1.78  | 0.5354 | 1.000 | abnormal male meiosis                               |
| 1915 | 56  | 2  | 1.77  | 0.5360 | 1.000 | intracranial hemorrhage                             |
| 9250 | 283 | 10 | 9.93  | 0.5368 | 1.000 | abnormal appendicular skeleton morphology           |
| 281  | 127 | 5  | 4.82  | 0.5372 | 1.000 | abnormal ventricular septum morphology              |
| 1545 | 152 | 5  | 4.85  | 0.5372 | 1.000 | abnormal hematopoietic system physiology            |
| 8803 | 57  | 2  | 1.76  | 0.5384 | 1.000 | abnormal placental labyrinth vasculature morphology |
| 34   | 62  | 3  | 2.8   | 0.5394 | 1.000 | abnormal vestibule morphology                       |

|      |     |    |       |        |       |                                                |
|------|-----|----|-------|--------|-------|------------------------------------------------|
| 2168 | 81  | 4  | 3.82  | 0.5430 | 1.000 | other aberrant phenotype                       |
| 1153 | 51  | 2  | 1.74  | 0.5432 | 1.000 | small seminiferous tubules                     |
| 5065 | 111 | 3  | 2.84  | 0.5436 | 1.000 | abnormal neutrophil morphology                 |
| 2136 | 250 | 8  | 7.97  | 0.5440 | 1.000 | abnormal kidney physiology                     |
| 693  | 59  | 2  | 1.8   | 0.5448 | 1.000 | spleen hyperplasia                             |
| 267  | 254 | 10 | 9.94  | 0.5454 | 1.000 | abnormal heart development                     |
| 3055 | 105 | 4  | 3.84  | 0.5474 | 1.000 | abnormal long bone epiphyseal plate morphology |
| 1515 | 64  | 3  | 2.84  | 0.5476 | 1.000 | abnormal grip strength                         |
| 3048 | 87  | 3  | 2.8   | 0.5478 | 1.000 | abnormal cervical vertebrae morphology         |
| 5502 | 330 | 11 | 11.06 | 0.5480 | 1.000 | abnormal urinary system physiology             |
| 1586 | 100 | 4  | 3.85  | 0.5484 | 1.000 | abnormal erythrocyte cell number               |
| 8284 | 25  | 2  | 1.77  | 0.5486 | 1.000 | abnormal hippocampus pyramidal cell layer      |
| 2199 | 79  | 4  | 3.87  | 0.5488 | 1.000 | abnormal brain commissure morphology           |
| 1051 | 59  | 3  | 2.83  | 0.5510 | 1.000 | abnormal somatic motor system morphology       |
| 6307 | 52  | 2  | 1.77  | 0.5530 | 1.000 | abnormal seminiferous tubule size              |
| 2722 | 625 | 20 | 20.18 | 0.5534 | 1.000 | abnormal immune system organ morphology        |
| 1846 | 426 | 13 | 13.08 | 0.5542 | 1.000 | increased inflammatory response                |
| 545  | 465 | 16 | 16.18 | 0.5548 | 1.000 | abnormal limbs/digits/tail morphology          |
| 5371 | 465 | 16 | 16.18 | 0.5548 | 1.000 | limbs/digits/tail phenotype                    |
| 1053 | 42  | 2  | 1.8   | 0.5558 | 1.000 | abnormal neuromuscular synapse morphology      |
| 2428 | 48  | 2  | 1.82  | 0.5560 | 1.000 | abnormal semicircular canal                    |
| 812  | 41  | 2  | 1.8   | 0.5560 | 1.000 | abnormal dentate gyrus morphology              |
| 352  | 163 | 4  | 3.96  | 0.5564 | 1.000 | decreased cell proliferation                   |
| 2364 | 177 | 6  | 6     | 0.5592 | 1.000 | abnormal thymus size                           |
| 4087 | 195 | 8  | 8.02  | 0.5592 | 1.000 | abnormal muscle fiber morphology               |
| 5606 | 58  | 2  | 1.84  | 0.5602 | 1.000 | increased bleeding time                        |
| 2160 | 705 | 21 | 21.25 | 0.5620 | 1.000 | abnormal reproductive system morphology        |
| 788  | 140 | 6  | 5.99  | 0.5636 | 1.000 | abnormal cerebral cortex morphology            |
| 5392 | 212 | 9  | 9.1   | 0.5640 | 1.000 | touch/vibrissae phenotype                      |
| 5373 | 804 | 32 | 32.48 | 0.5640 | 1.000 | lethality-postnatal                            |
| 102  | 42  | 2  | 1.83  | 0.5642 | 1.000 | abnormal nasal bone morphology                 |
| 9937 | 147 | 6  | 6.02  | 0.5646 | 1.000 | abnormal neuron differentiation                |
| 706  | 141 | 5  | 4.99  | 0.5648 | 1.000 | small thymus                                   |
| 5369 | 748 | 29 | 29.43 | 0.5656 | 1.000 | muscle phenotype                               |
| 1523 | 66  | 4  | 3.87  | 0.5666 | 1.000 | impaired righting response                     |
| 3169 | 141 | 7  | 7.04  | 0.5668 | 1.000 | abnormal scala media morphology                |
| 3936 | 137 | 5  | 4.97  | 0.5668 | 1.000 | abnormal reproductive system development       |
| 2675 | 99  | 3  | 2.94  | 0.5678 | 1.000 | asthenozoospermia                              |
| 5598 | 45  | 2  | 1.85  | 0.5688 | 1.000 | decreased ventricle muscle contractility       |
| 1914 | 298 | 10 | 10.22 | 0.5694 | 1.000 | hemorrhage                                     |
| 5425 | 60  | 2  | 1.88  | 0.5696 | 1.000 | increased macrophage cell number               |
| 1925 | 322 | 10 | 10.15 | 0.5702 | 1.000 | male infertility                               |
| 2108 | 497 | 18 | 18.42 | 0.5712 | 1.000 | abnormal muscle morphology                     |
| 1463 | 122 | 7  | 7.05  | 0.5716 | 1.000 | abnormal spatial learning                      |
| 1402 | 183 | 7  | 7.08  | 0.5716 | 1.000 | hypoactivity                                   |
| 6205 | 241 | 6  | 6.1   | 0.5752 | 1.000 | embryonic lethality before somite formation    |
| 5418 | 438 | 14 | 14.31 | 0.5752 | 1.000 | abnormal circulating hormone level             |
| 134  | 41  | 2  | 1.86  | 0.5768 | 1.000 | abnormal cortical bone thickness               |
| 2189 | 93  | 4  | 4     | 0.5774 | 1.000 | abnormal myocardial trabeculae morphology      |
| 1240 | 69  | 2  | 1.89  | 0.5778 | 1.000 | abnormal epidermis stratum corneum morphology  |
| 534  | 42  | 2  | 1.87  | 0.5780 | 1.000 | abnormal ureter morphology                     |
| 2971 | 64  | 2  | 1.93  | 0.5788 | 1.000 | abnormal brown adipose tissue morphology       |
| 4408 | 31  | 2  | 1.88  | 0.5788 | 1.000 | decreased cochlear hair cell number            |
| 2729 | 51  | 2  | 1.89  | 0.5804 | 1.000 | abnormal inner ear canal morphology            |
| 2139 | 221 | 6  | 6.2   | 0.5814 | 1.000 | abnormal liver/biliary system physiology       |
| 2797 | 24  | 2  | 1.84  | 0.5828 | 1.000 | increased thigmotaxis                          |
| 5578 | 100 | 3  | 3.01  | 0.5846 | 1.000 | teratozoospermia                               |
| 2106 | 466 | 19 | 19.53 | 0.5880 | 1.000 | abnormal muscle physiology                     |
| 2083 | 602 | 25 | 25.52 | 0.5884 | 1.000 | premature death                                |
| 2339 | 178 | 5  | 5.11  | 0.5900 | 1.000 | abnormal lymph node morphology                 |
| 1613 | 44  | 2  | 1.92  | 0.5914 | 1.000 | abnormal vasodilation                          |
| 1326 | 56  | 2  | 1.94  | 0.5916 | 1.000 | retinal degeneration                           |
| 1386 | 80  | 4  | 4.06  | 0.5926 | 1.000 | abnormal maternal nurturing                    |
| 3861 | 610 | 23 | 23.71 | 0.5958 | 1.000 | abnormal nervous system development            |
| 9939 | 29  | 2  | 1.91  | 0.5968 | 1.000 | abnormal hippocampus neuron morphology         |
| 240  | 74  | 2  | 1.99  | 0.5978 | 1.000 | extramedullary hematopoiesis                   |
| 4197 | 150 | 4  | 4.12  | 0.5984 | 1.000 | abnormal fetal growth/weight/body size         |
| 3920 | 102 | 4  | 4.09  | 0.5990 | 1.000 | abnormal heart right ventricle morphology      |
| 1923 | 168 | 7  | 7.29  | 0.6008 | 1.000 | reduced female fertility                       |
| 875  | 102 | 6  | 6.22  | 0.6020 | 1.000 | abnormal cerebellar Purkinje cell layer        |
| 5306 | 48  | 2  | 1.98  | 0.6036 | 1.000 | abnormal phalanx morphology                    |

|      |     |    |       |        |       |                                                           |
|------|-----|----|-------|--------|-------|-----------------------------------------------------------|
| 780  | 59  | 3  | 3.05  | 0.6040 | 1.000 | abnormal corpus callosum morphology                       |
| 60   | 71  | 2  | 2.01  | 0.6052 | 1.000 | delayed bone ossification                                 |
| 2843 | 57  | 2  | 2.03  | 0.6068 | 1.000 | decreased blood pressure                                  |
| 8495 | 67  | 2  | 2.02  | 0.6072 | 1.000 | decreased IgG1 level                                      |
| 4599 | 61  | 2  | 1.99  | 0.6082 | 1.000 | abnormal vertebral arch morphology                        |
| 6113 | 137 | 5  | 5.2   | 0.6112 | 1.000 | abnormal heart septum morphology                          |
| 6206 | 93  | 2  | 2.07  | 0.6120 | 1.000 | embryonic lethality before turning of embryo              |
| 1436 | 84  | 3  | 3.1   | 0.6128 | 1.000 | abnormal suckling behavior                                |
| 8892 | 57  | 2  | 2.01  | 0.6132 | 1.000 | abnormal sperm flagellum morphology                       |
| 4937 | 107 | 4  | 4.16  | 0.6138 | 1.000 | dilated heart                                             |
| 2113 | 338 | 12 | 12.59 | 0.6148 | 1.000 | abnormal skeleton development                             |
| 6004 | 64  | 3  | 3.06  | 0.6170 | 1.000 | abnormal interneuron morphology                           |
| 8219 | 62  | 3  | 3.11  | 0.6178 | 1.000 | abnormal dorsal telencephalic commissure morphology       |
| 26   | 183 | 8  | 8.44  | 0.6196 | 1.000 | abnormal inner ear morphology                             |
| 740  | 22  | 2  | 1.93  | 0.6210 | 1.000 | impaired smooth muscle contractility                      |
| 4686 | 112 | 4  | 4.21  | 0.6226 | 1.000 | decreased length of long bones                            |
| 1588 | 96  | 3  | 3.12  | 0.6226 | 1.000 | abnormal hemoglobin                                       |
| 1823 | 98  | 3  | 3.19  | 0.6230 | 1.000 | thymus hypoplasia                                         |
| 913  | 381 | 14 | 14.74 | 0.6230 | 1.000 | abnormal brain development                                |
| 1575 | 140 | 5  | 5.28  | 0.6246 | 1.000 | cyanosis                                                  |
| 2128 | 377 | 13 | 13.72 | 0.6248 | 1.000 | abnormal blood circulation                                |
| 5201 | 58  | 2  | 2.06  | 0.6264 | 1.000 | abnormal retinal pigment epithelium morphology            |
| 4852 | 127 | 3  | 3.2   | 0.6286 | 1.000 | decreased testis weight                                   |
| 885  | 18  | 2  | 1.97  | 0.6318 | 1.000 | ectopic Purkinje cell                                     |
| 31   | 154 | 7  | 7.49  | 0.6320 | 1.000 | abnormal cochlea morphology                               |
| 2884 | 93  | 3  | 3.19  | 0.6322 | 1.000 | abnormal branchial arch morphology                        |
| 2912 | 48  | 3  | 3.17  | 0.6336 | 1.000 | abnormal excitatory postsynaptic potential                |
| 2409 | 93  | 2  | 2.14  | 0.6346 | 1.000 | decreased susceptibility to infection                     |
| 2376 | 84  | 2  | 2.15  | 0.6370 | 1.000 | abnormal dendritic cell physiology                        |
| 8779 | 84  | 4  | 4.29  | 0.6388 | 1.000 | abnormal maternal behavior                                |
| 5449 | 217 | 7  | 7.58  | 0.6392 | 1.000 | abnormal food intake                                      |
| 5316 | 52  | 3  | 3.2   | 0.6398 | 1.000 | abnormal response to tactile stimuli                      |
| 2915 | 57  | 4  | 4.22  | 0.6402 | 1.000 | abnormal synaptic depression                              |
| 1756 | 70  | 3  | 3.19  | 0.6420 | 1.000 | abnormal urination                                        |
| 2855 | 68  | 3  | 3.23  | 0.6424 | 1.000 | abnormal cochlear ganglion morphology                     |
| 628  | 82  | 3  | 3.24  | 0.6438 | 1.000 | abnormal mammary gland development                        |
| 5367 | 570 | 20 | 21.25 | 0.6448 | 1.000 | renal/urinary system phenotype                            |
| 1664 | 68  | 3  | 3.23  | 0.6478 | 1.000 | abnormal digestion                                        |
| 2862 | 76  | 4  | 4.29  | 0.6480 | 1.000 | altered righting response                                 |
| 5215 | 99  | 3  | 3.27  | 0.6480 | 1.000 | abnormal pancreatic islet morphology                      |
| 1943 | 320 | 13 | 13.83 | 0.6504 | 1.000 | abnormal respiration                                      |
| 9165 | 100 | 3  | 3.29  | 0.6526 | 1.000 | abnormal endocrine pancreas morphology                    |
| 1944 | 141 | 4  | 4.4   | 0.6530 | 1.000 | abnormal pancreas morphology                              |
| 3635 | 351 | 21 | 22.22 | 0.6544 | 1.000 | abnormal synaptic transmission                            |
| 1951 | 169 | 7  | 7.59  | 0.6566 | 1.000 | abnormal breathing                                        |
| 3699 | 420 | 14 | 15    | 0.6576 | 1.000 | abnormal female reproductive system physiology            |
| 9674 | 46  | 2  | 2.15  | 0.6582 | 1.000 | decreased birth weight                                    |
| 5200 | 64  | 2  | 2.17  | 0.6586 | 1.000 | abnormal pigment epithelium of the eye                    |
| 819  | 73  | 3  | 3.29  | 0.6588 | 1.000 | abnormal olfactory bulb morphology                        |
| 9850 | 312 | 7  | 7.73  | 0.6592 | 1.000 | embryonic lethality between implantation and placentation |
| 5406 | 257 | 9  | 9.81  | 0.6608 | 1.000 | abnormal heart size                                       |
| 2628 | 104 | 3  | 3.36  | 0.6626 | 1.000 | hepatic steatosis                                         |
| 4406 | 44  | 2  | 2.18  | 0.6630 | 1.000 | abnormal cochlear hair cell number                        |
| 6069 | 158 | 6  | 6.63  | 0.6636 | 1.000 | abnormal retinal neuronal layer morphology                |
| 5452 | 277 | 8  | 8.83  | 0.6652 | 1.000 | abnormal adipose tissue amount                            |
| 2231 | 79  | 2  | 2.22  | 0.6658 | 1.000 | abnormal primitive streak morphology                      |
| 2315 | 173 | 7  | 7.69  | 0.6682 | 1.000 | abnormal respiratory signs/symptoms                       |
| 9819 | 48  | 2  | 2.17  | 0.6700 | 1.000 | abnormal circulating androgen level                       |
| 5180 | 48  | 2  | 2.17  | 0.6700 | 1.000 | abnormal circulating testosterone level                   |
| 2109 | 310 | 10 | 11.06 | 0.6702 | 1.000 | abnormal limb morphology                                  |
| 2498 | 99  | 2  | 2.29  | 0.6714 | 1.000 | abnormal acute inflammation                               |
| 9672 | 47  | 2  | 2.22  | 0.6726 | 1.000 | abnormal birth weight                                     |
| 3744 | 251 | 8  | 8.84  | 0.6728 | 1.000 | abnormal orofacial morphology                             |
| 1177 | 50  | 2  | 2.23  | 0.6736 | 1.000 | atelectasis                                               |
| 1120 | 107 | 4  | 4.48  | 0.6740 | 1.000 | abnormal uterus morphology                                |
| 1312 | 79  | 2  | 2.27  | 0.6748 | 1.000 | abnormal cornea morphology                                |
| 849  | 186 | 9  | 9.93  | 0.6760 | 1.000 | abnormal cerebellum morphology                            |
| 1930 | 101 | 2  | 2.31  | 0.6774 | 1.000 | abnormal meiosis                                          |
| 2058 | 507 | 18 | 19.43 | 0.6776 | 1.000 | neonatal lethality                                        |
| 3115 | 76  | 3  | 3.38  | 0.6792 | 1.000 | abnormal respiratory system development                   |
| 9944 | 78  | 3  | 3.41  | 0.6794 | 1.000 | abnormal olfactory lobe morphology                        |

|      |      |    |       |        |       |                                               |
|------|------|----|-------|--------|-------|-----------------------------------------------|
| 2980 | 82   | 4  | 4.46  | 0.6798 | 1.000 | abnormal postural reflex                      |
| 2945 | 40   | 2  | 2.21  | 0.6814 | 1.000 | abnormal inhibitory postsynaptic currents     |
| 5370 | 597  | 16 | 17.5  | 0.6816 | 1.000 | liver/biliary system phenotype                |
| 6325 | 113  | 5  | 5.63  | 0.6830 | 1.000 | impaired hearing                              |
| 8026 | 99   | 4  | 4.57  | 0.6840 | 1.000 | abnormal brain white matter morphology        |
| 592  | 61   | 2  | 2.25  | 0.6840 | 1.000 | short tail                                    |
| 436  | 67   | 3  | 3.44  | 0.6846 | 1.000 | abnormal head movements                       |
| 2272 | 172  | 9  | 10.03 | 0.6854 | 1.000 | abnormal nervous system electrophysiology     |
| 1175 | 272  | 9  | 10.09 | 0.6868 | 1.000 | abnormal lung morphology                      |
| 2371 | 34   | 2  | 2.23  | 0.6870 | 1.000 | abnormal thymus cortex morphology             |
| 1970 | 131  | 5  | 5.67  | 0.6884 | 1.000 | abnormal pain threshold                       |
| 1340 | 133  | 4  | 4.62  | 0.6890 | 1.000 | abnormal eyelid morphology                    |
| 8872 | 254  | 10 | 11.08 | 0.6898 | 1.000 | abnormal physiological response to xenobiotic |
| 847  | 190  | 9  | 10.08 | 0.6904 | 1.000 | abnormal metencephalon morphology             |
| 1967 | 75   | 3  | 3.49  | 0.6906 | 1.000 | deafness                                      |
| 5595 | 75   | 3  | 3.44  | 0.6908 | 1.000 | abnormal vascular smooth muscle physiology    |
| 3723 | 212  | 7  | 7.92  | 0.6910 | 1.000 | abnormal long bone morphology                 |
| 1330 | 50   | 2  | 2.29  | 0.6930 | 1.000 | abnormal optic nerve morphology               |
| 2068 | 90   | 4  | 4.59  | 0.6936 | 1.000 | abnormal parental behavior                    |
| 3633 | 975  | 44 | 46.7  | 0.6948 | 1.000 | abnormal nervous system physiology            |
| 5395 | 116  | 4  | 4.67  | 0.6950 | 1.000 | other phenotype                               |
| 4811 | 136  | 7  | 7.9   | 0.6954 | 1.000 | abnormal neuron physiology                    |
| 599  | 107  | 3  | 3.51  | 0.6956 | 1.000 | enlarged liver                                |
| 1533 | 218  | 7  | 7.92  | 0.6962 | 1.000 | abnormal skeleton physiology                  |
| 627  | 94   | 3  | 3.5   | 0.6966 | 1.000 | abnormal mammary gland morphology             |
| 9931 | 267  | 7  | 8.02  | 0.6966 | 1.000 | abnormal skin appearance                      |
| 1905 | 49   | 2  | 2.29  | 0.6978 | 1.000 | abnormal dopamine level                       |
| 3232 | 102  | 3  | 3.5   | 0.6984 | 1.000 | abnormal forebrain development                |
| 4425 | 51   | 2  | 2.32  | 0.6992 | 1.000 | abnormal otolith organ                        |
| 5563 | 81   | 2  | 2.36  | 0.6992 | 1.000 | abnormal hemoglobin content                   |
| 807  | 145  | 7  | 7.92  | 0.7010 | 1.000 | abnormal hippocampus morphology               |
| 4848 | 213  | 6  | 6.9   | 0.7012 | 1.000 | abnormal liver size                           |
| 2734 | 62   | 3  | 3.51  | 0.7034 | 1.000 | abnormal mechanical nociception               |
| 5202 | 66   | 2  | 2.4   | 0.7042 | 1.000 | lethargy                                      |
| 2674 | 112  | 3  | 3.55  | 0.7056 | 1.000 | abnormal sperm motility                       |
| 877  | 93   | 5  | 5.75  | 0.7066 | 1.000 | abnormal Purkinje cell morphology             |
| 6126 | 81   | 3  | 3.6   | 0.7090 | 1.000 | abnormal outflow tract development            |
| 163  | 203  | 7  | 8.06  | 0.7098 | 1.000 | abnormal cartilage morphology                 |
| 920  | 92   | 3  | 3.56  | 0.7100 | 1.000 | abnormal myelination                          |
| 2896 | 77   | 3  | 3.52  | 0.7106 | 1.000 | abnormal bone mineralization                  |
| 601  | 111  | 3  | 3.57  | 0.7118 | 1.000 | small liver                                   |
| 9956 | 122  | 6  | 6.91  | 0.7132 | 1.000 | abnormal cerebellar layer morphology          |
| 4036 | 31   | 2  | 2.23  | 0.7134 | 1.000 | abnormal muscle relaxation                    |
| 1454 | 48   | 3  | 3.5   | 0.7154 | 1.000 | abnormal cued conditioning behavior           |
| 2891 | 77   | 2  | 2.45  | 0.7176 | 1.000 | increased insulin sensitivity                 |
| 897  | 77   | 3  | 3.51  | 0.7188 | 1.000 | abnormal midbrain morphology                  |
| 4085 | 129  | 5  | 5.91  | 0.7196 | 1.000 | abnormal heartbeat                            |
| 280  | 63   | 2  | 2.42  | 0.7212 | 1.000 | thin ventricular wall                         |
| 1176 | 60   | 2  | 2.46  | 0.7226 | 1.000 | abnormal lung development                     |
| 1963 | 181  | 8  | 9.23  | 0.7240 | 1.000 | abnormal hearing physiology                   |
| 3631 | 1762 | 69 | 73.16 | 0.7256 | 1.000 | nervous system phenotype                      |
| 813  | 32   | 2  | 2.38  | 0.7256 | 1.000 | abnormal hippocampus layer morphology         |
| 9661 | 88   | 3  | 3.63  | 0.7260 | 1.000 | abnormal pregnancy                            |
| 1924 | 465  | 13 | 14.79 | 0.7268 | 1.000 | infertility                                   |
| 5559 | 113  | 3  | 3.74  | 0.7290 | 1.000 | increased circulating glucose level           |
| 4021 | 48   | 2  | 2.45  | 0.7290 | 1.000 | abnormal rod electrophysiology                |
| 771  | 104  | 4  | 4.83  | 0.7308 | 1.000 | abnormal brain size                           |
| 297  | 44   | 2  | 2.42  | 0.7314 | 1.000 | abnormal endocardial cushion morphology       |
| 1574 | 158  | 5  | 5.95  | 0.7318 | 1.000 | abnormal oxygen level                         |
| 2910 | 48   | 4  | 4.69  | 0.7318 | 1.000 | abnormal excitatory postsynaptic currents     |
| 3105 | 106  | 4  | 4.87  | 0.7324 | 1.000 | abnormal heart atrium morphology              |
| 8489 | 74   | 2  | 2.54  | 0.7330 | 1.000 | postnatal slow weight gain                    |
| 1805 | 134  | 3  | 3.77  | 0.7332 | 1.000 | decreased IgG level                           |
| 6362 | 302  | 7  | 8.33  | 0.7338 | 1.000 | abnormal male germ cell morphology            |
| 5389 | 1078 | 33 | 35.94 | 0.7344 | 1.000 | reproductive system phenotype                 |
| 556  | 140  | 4  | 4.93  | 0.7348 | 1.000 | abnormal hindlimb morphology                  |
| 889  | 32   | 2  | 2.5   | 0.7372 | 1.000 | abnormal cerebellar molecular layer           |
| 961  | 73   | 2  | 2.55  | 0.7374 | 1.000 | abnormal dorsal root ganglion morphology      |
| 633  | 76   | 2  | 2.53  | 0.7400 | 1.000 | abnormal pituitary gland morphology           |
| 5274 | 178  | 5  | 6.05  | 0.7406 | 1.000 | abnormal viscerocranium morphology            |
| 5197 | 74   | 2  | 2.58  | 0.7412 | 1.000 | abnormal uvea morphology                      |

|      |      |    |       |        |       |                                                    |
|------|------|----|-------|--------|-------|----------------------------------------------------|
| 1510 | 108  | 3  | 3.78  | 0.7416 | 1.000 | abnormal coat appearance                           |
| 2208 | 347  | 8  | 9.54  | 0.7416 | 1.000 | abnormal germ cell morphology                      |
| 801  | 150  | 7  | 8.27  | 0.7444 | 1.000 | abnormal temporal lobe morphology                  |
| 2078 | 382  | 11 | 12.87 | 0.7478 | 1.000 | abnormal glucose homeostasis                       |
| 2177 | 75   | 2  | 2.64  | 0.7490 | 1.000 | abnormal outer ear morphology                      |
| 4850 | 137  | 3  | 3.82  | 0.7524 | 1.000 | abnormal testis weight                             |
| 1473 | 69   | 3  | 3.81  | 0.7526 | 1.000 | reduced long term potentiation                     |
| 2163 | 816  | 22 | 24.57 | 0.7564 | 1.000 | abnormal gland morphology                          |
| 4097 | 143  | 7  | 8.4   | 0.7566 | 1.000 | abnormal cerebellar cortex morphology              |
| 947  | 89   | 4  | 5     | 0.7608 | 1.000 | convulsive seizures                                |
| 285  | 69   | 2  | 2.72  | 0.7608 | 1.000 | abnormal cardiac valve morphology                  |
| 2705 | 55   | 2  | 2.61  | 0.7614 | 1.000 | dilated renal tubules                              |
| 1388 | 111  | 5  | 6.16  | 0.7626 | 1.000 | abnormal stationary movement                       |
| 2206 | 296  | 17 | 19.36 | 0.7650 | 1.000 | abnormal CNS synaptic transmission                 |
| 2133 | 459  | 16 | 18.4  | 0.7652 | 1.000 | abnormal respiratory system physiology             |
| 4543 | 130  | 3  | 3.94  | 0.7654 | 1.000 | abnormal sperm physiology                          |
| 823  | 69   | 2  | 2.67  | 0.7658 | 1.000 | abnormal lateral ventricle morphology              |
| 189  | 64   | 2  | 2.64  | 0.7684 | 1.000 | hypoglycemia                                       |
| 8022 | 73   | 2  | 2.68  | 0.7690 | 1.000 | dilated heart ventricles                           |
| 960  | 155  | 5  | 6.29  | 0.7714 | 1.000 | abnormal sensory ganglion morphology               |
| 631  | 81   | 2  | 2.73  | 0.7790 | 1.000 | abnormal neuroendocrine gland morphology           |
| 2200 | 149  | 4  | 5.26  | 0.7818 | 1.000 | abnormal brain ventricle/choroid plexus morphology |
| 1324 | 83   | 2  | 2.78  | 0.7860 | 1.000 | abnormal eye pigmentation                          |
| 5508 | 772  | 24 | 27.41 | 0.7866 | 1.000 | abnormal skeleton morphology                       |
| 452  | 246  | 7  | 8.7   | 0.7882 | 1.000 | abnormal mouth morphology                          |
| 5386 | 1478 | 57 | 62.02 | 0.7886 | 1.000 | behavior/neurological phenotype                    |
| 4924 | 1478 | 57 | 62.02 | 0.7886 | 1.000 | abnormal behavior                                  |
| 1469 | 68   | 3  | 4.02  | 0.7902 | 1.000 | abnormal contextual conditioning behavior          |
| 8079 | 84   | 2  | 2.87  | 0.7914 | 1.000 | decreased CD8-positive T cell number               |
| 5195 | 293  | 10 | 12.16 | 0.7916 | 1.000 | abnormal posterior eye segment morphology          |
| 1629 | 104  | 4  | 5.29  | 0.7920 | 1.000 | abnormal heart rate                                |
| 558  | 72   | 2  | 2.9   | 0.7968 | 1.000 | abnormal tibia morphology                          |
| 6042 | 163  | 4  | 5.24  | 0.7972 | 1.000 | increased apoptosis                                |
| 4847 | 88   | 2  | 2.87  | 0.7992 | 1.000 | abnormal liver weight                              |
| 3727 | 189  | 6  | 7.74  | 0.7996 | 1.000 | abnormal retinal layer morphology                  |
| 5372 | 892  | 31 | 34.94 | 0.8012 | 1.000 | life span-post-weaning/aging                       |
| 4166 | 176  | 7  | 8.82  | 0.8026 | 1.000 | abnormal limbic system morphology                  |
| 1263 | 184  | 6  | 7.68  | 0.8034 | 1.000 | weight loss                                        |
| 6335 | 142  | 6  | 7.72  | 0.8046 | 1.000 | abnormal hearing electrophysiology                 |
| 9389 | 87   | 2  | 2.9   | 0.8056 | 1.000 | abnormal extracutaneous pigmentation               |
| 2405 | 102  | 2  | 2.97  | 0.8058 | 1.000 | respiratory system inflammation                    |
| 559  | 80   | 2  | 2.98  | 0.8068 | 1.000 | abnormal femur morphology                          |
| 5390 | 824  | 25 | 28.82 | 0.8070 | 1.000 | skeleton phenotype                                 |
| 3698 | 469  | 13 | 15.62 | 0.8096 | 1.000 | abnormal male reproductive system physiology       |
| 841  | 232  | 10 | 12.39 | 0.8124 | 1.000 | abnormal hindbrain morphology                      |
| 438  | 295  | 9  | 11.28 | 0.8148 | 1.000 | abnormal skull morphology                          |
| 2067 | 415  | 19 | 22.32 | 0.8152 | 1.000 | abnormal sensory capabilities/reflexes/nociception |
| 188  | 241  | 6  | 7.95  | 0.8168 | 1.000 | abnormal circulating glucose level                 |
| 5442 | 46   | 2  | 2.85  | 0.8178 | 1.000 | abnormal pyramidal neuron morphology               |
| 4262 | 123  | 4  | 5.51  | 0.8182 | 1.000 | abnormal physical strength                         |
| 1468 | 76   | 3  | 4.25  | 0.8196 | 1.000 | abnormal temporal memory                           |
| 1961 | 265  | 13 | 15.66 | 0.8200 | 1.000 | abnormal reflex                                    |
| 1408 | 101  | 4  | 5.41  | 0.8230 | 1.000 | stereotypic behavior                               |
| 1056 | 126  | 5  | 6.63  | 0.8240 | 1.000 | abnormal cranial nerve morphology                  |
| 1156 | 339  | 7  | 9.24  | 0.8260 | 1.000 | abnormal spermatogenesis                           |
| 5560 | 130  | 3  | 4.34  | 0.8286 | 1.000 | decreased circulating glucose level                |
| 1522 | 52   | 3  | 4.09  | 0.8304 | 1.000 | impaired swimming                                  |
| 1407 | 26   | 2  | 2.68  | 0.8304 | 1.000 | short stride length                                |
| 2367 | 48   | 2  | 2.94  | 0.8316 | 1.000 | abnormal thymus lobule morphology                  |
| 164  | 101  | 3  | 4.33  | 0.8322 | 1.000 | abnormal cartilage development                     |
| 1399 | 163  | 7  | 9.18  | 0.8328 | 1.000 | hyperactivity                                      |
| 2727 | 112  | 2  | 3.17  | 0.8338 | 1.000 | decreased circulating insulin level                |
| 1657 | 268  | 7  | 9.28  | 0.8346 | 1.000 | abnormal induced morbidity/mortality               |
| 3632 | 1399 | 50 | 56.06 | 0.8360 | 1.000 | abnormal nervous system morphology                 |
| 2116 | 306  | 9  | 11.55 | 0.8360 | 1.000 | abnormal craniofacial bone morphology              |
| 414  | 64   | 2  | 2.94  | 0.8412 | 1.000 | alopecia                                           |
| 3313 | 476  | 17 | 20.71 | 0.8422 | 1.000 | abnormal locomotor activation                      |
| 5454 | 92   | 2  | 3.19  | 0.8430 | 1.000 | decreased adipose tissue amount                    |
| 454  | 139  | 3  | 4.54  | 0.8480 | 1.000 | abnormal jaw morphology                            |
| 787  | 376  | 13 | 16.27 | 0.8486 | 1.000 | abnormal telencephalon morphology                  |
| 1784 | 306  | 7  | 9.59  | 0.8510 | 1.000 | abnormal fluid regulation                          |



|      |     |    |       |        |       |                                                      |
|------|-----|----|-------|--------|-------|------------------------------------------------------|
| 2132 | 371 | 10 | 13.12 | 0.8532 | 1.000 | abnormal respiratory system morphology               |
| 4765 | 97  | 3  | 4.61  | 0.8536 | 1.000 | decreased brainstem auditory evoked potential        |
| 1560 | 201 | 4  | 5.93  | 0.8540 | 1.000 | abnormal circulating insulin level                   |
| 8873 | 117 | 3  | 4.53  | 0.8558 | 1.000 | increased physiological sensitivity to xenobiotic    |
| 550  | 90  | 2  | 3.34  | 0.8584 | 1.000 | abnormal forelimb morphology                         |
| 5388 | 644 | 20 | 24.44 | 0.8598 | 1.000 | respiratory system phenotype                         |
| 157  | 126 | 3  | 4.66  | 0.8608 | 1.000 | abnormal sternum morphology                          |
| 1325 | 265 | 8  | 10.8  | 0.8624 | 1.000 | abnormal retina morphology                           |
| 2060 | 451 | 10 | 13.39 | 0.8632 | 1.000 | abnormal skin morphology                             |
| 774  | 82  | 2  | 3.33  | 0.8638 | 1.000 | decreased brain size                                 |
| 783  | 499 | 16 | 20.15 | 0.8682 | 1.000 | abnormal forebrain morphology                        |
| 4742 | 105 | 4  | 5.89  | 0.8688 | 1.000 | abnormal vestibular system physiology                |
| 5391 | 650 | 19 | 23.49 | 0.8722 | 1.000 | vision/eye phenotype                                 |
| 966  | 100 | 3  | 4.77  | 0.8726 | 1.000 | decreased sensory neuron number                      |
| 5273 | 91  | 2  | 3.43  | 0.8752 | 1.000 | abnormal cranial base morphology                     |
| 9643 | 203 | 4  | 6.15  | 0.8760 | 1.000 | abnormal urine homeostasis                           |
| 2216 | 192 | 4  | 6.15  | 0.8764 | 1.000 | abnormal seminiferous tubule morphology              |
| 2092 | 594 | 17 | 21.37 | 0.8778 | 1.000 | abnormal eye morphology                              |
| 5551 | 123 | 4  | 6.04  | 0.8784 | 1.000 | abnormal eye electrophysiology                       |
| 2864 | 272 | 8  | 11.03 | 0.8786 | 1.000 | abnormal ocular fundus morphology                    |
| 9765 | 78  | 2  | 3.42  | 0.8794 | 1.000 | abnormal xenobiotic induced morbidity/mortality      |
| 9763 | 204 | 5  | 7.4   | 0.8796 | 1.000 | increased sensitivity to induced morbidity/mortality |
| 5253 | 219 | 6  | 8.75  | 0.8812 | 1.000 | abnormal eye physiology                              |
| 914  | 122 | 2  | 3.57  | 0.8820 | 1.000 | exencephaly                                          |
| 2152 | 820 | 28 | 33.67 | 0.8828 | 1.000 | abnormal brain morphology                            |
| 4738 | 127 | 4  | 6.24  | 0.8830 | 1.000 | abnormal brainstem auditory evoked potential         |
| 2979 | 93  | 3  | 4.73  | 0.8836 | 1.000 | abnormal vestibular response                         |
| 2733 | 80  | 2  | 3.53  | 0.8848 | 1.000 | abnormal thermal nociception                         |
| 1929 | 414 | 8  | 11.35 | 0.8852 | 1.000 | abnormal gametogenesis                               |
| 3492 | 360 | 15 | 19.05 | 0.8854 | 1.000 | abnormal involuntary movement                        |
| 5193 | 195 | 4  | 6.35  | 0.8882 | 1.000 | abnormal anterior eye segment morphology             |
| 3308 | 120 | 4  | 6.22  | 0.8898 | 1.000 | abnormal cochlear sensory epithelium morphology      |
| 1731 | 500 | 14 | 18.21 | 0.8900 | 1.000 | abnormal postnatal growth                            |
| 1732 | 485 | 13 | 17.15 | 0.8906 | 1.000 | postnatal growth retardation                         |
| 1954 | 128 | 4  | 6.24  | 0.8908 | 1.000 | respiratory distress                                 |
| 3717 | 124 | 2  | 3.7   | 0.8914 | 1.000 | pallor                                               |
| 886  | 49  | 2  | 3.53  | 0.8918 | 1.000 | abnormal cerebellar granule layer                    |
| 42   | 121 | 4  | 6.26  | 0.8922 | 1.000 | abnormal organ of Corti                              |
| 1303 | 108 | 2  | 3.76  | 0.8960 | 1.000 | abnormal lens morphology                             |
| 45   | 123 | 4  | 6.36  | 0.8980 | 1.000 | abnormal hair cell morphology                        |
| 4703 | 326 | 9  | 12.55 | 0.8980 | 1.000 | abnormal vertebral column                            |
| 852  | 64  | 3  | 4.96  | 0.9004 | 1.000 | small cerebellum                                     |
| 1935 | 195 | 4  | 6.32  | 0.9012 | 1.000 | decreased litter size                                |
| 5501 | 137 | 2  | 3.81  | 0.9040 | 1.000 | abnormal skin physiology                             |
| 1081 | 111 | 3  | 5.08  | 0.9086 | 1.000 | abnormal cranial ganglia morphology                  |
| 1785 | 211 | 4  | 6.74  | 0.9094 | 1.000 | edema                                                |
| 937  | 92  | 2  | 3.8   | 0.9100 | 1.000 | abnormal motor neuron morphology                     |
| 1933 | 203 | 4  | 6.55  | 0.9142 | 1.000 | abnormal litter size                                 |
| 1919 | 893 | 24 | 30.22 | 0.9144 | 1.000 | abnormal reproductive system physiology              |
| 5535 | 104 | 2  | 3.9   | 0.9194 | 1.000 | abnormal body temperature                            |
| 9703 | 85  | 2  | 3.94  | 0.9196 | 1.000 | decreased birth body size                            |
| 1516 | 445 | 18 | 23.32 | 0.9204 | 1.000 | abnormal motor coordination/ balance                 |
| 8540 | 262 | 9  | 12.94 | 0.9220 | 1.000 | abnormal cerebrum morphology                         |
| 4174 | 145 | 4  | 6.79  | 0.9234 | 1.000 | abnormal spine curvature                             |
| 822  | 111 | 2  | 4.06  | 0.9240 | 1.000 | abnormal brain ventricle morphology                  |
| 972  | 136 | 4  | 6.84  | 0.9260 | 1.000 | abnormal mechanoreceptor morphology                  |
| 2020 | 267 | 5  | 8.2   | 0.9276 | 1.000 | increased tumor incidence                            |
| 9701 | 87  | 2  | 4.09  | 0.9284 | 1.000 | abnormal birth body size                             |
| 367  | 297 | 7  | 10.86 | 0.9310 | 1.000 | abnormal coat/ hair morphology                       |
| 1131 | 125 | 2  | 4.13  | 0.9316 | 1.000 | abnormal ovarian follicle morphology                 |
| 598  | 476 | 10 | 14.85 | 0.9320 | 1.000 | abnormal liver morphology                            |
| 5402 | 68  | 2  | 4.05  | 0.9320 | 1.000 | abnormal action potential                            |
| 1394 | 70  | 2  | 3.88  | 0.9330 | 1.000 | circling                                             |
| 57   | 156 | 3  | 5.66  | 0.9357 | 1.000 | abnormal osteogenesis                                |
| 2114 | 525 | 14 | 19.39 | 0.9365 | 1.000 | abnormal axial skeleton morphology                   |
| 8503 | 115 | 2  | 4.31  | 0.9367 | 1.000 | abnormal spinal cord grey matter morphology          |
| 4624 | 213 | 4  | 7.28  | 0.9381 | 1.000 | abnormal thoracic cage                               |
| 2184 | 148 | 5  | 8.36  | 0.9389 | 1.000 | abnormal innervation                                 |
| 3948 | 245 | 5  | 8.41  | 0.9397 | 1.000 | abnormal gas homeostasis                             |
| 2138 | 491 | 10 | 15.17 | 0.9415 | 1.000 | abnormal liver/biliary system morphology             |
| 8271 | 127 | 2  | 4.39  | 0.9441 | 1.000 | abnormal bone ossification                           |

|      |     |    |       |        |       |                                                   |
|------|-----|----|-------|--------|-------|---------------------------------------------------|
| 2166 | 344 | 6  | 10    | 0.9447 | 1.000 | altered tumor susceptibility                      |
| 2006 | 344 | 6  | 10    | 0.9447 | 1.000 | tumorigenesis                                     |
| 1392 | 684 | 24 | 31.18 | 0.9449 | 1.000 | abnormal locomotor activity                       |
| 1186 | 185 | 3  | 5.81  | 0.9453 | 1.000 | pigmentation phenotype                            |
| 1513 | 85  | 3  | 5.81  | 0.9493 | 1.000 | limb grasping                                     |
| 2161 | 788 | 20 | 27.27 | 0.9523 | 1.000 | abnormal fertility/fecundity                      |
| 8946 | 170 | 4  | 7.53  | 0.9541 | 1.000 | abnormal neuron number                            |
| 2019 | 302 | 5  | 8.97  | 0.9563 | 1.000 | abnormal tumor incidence                          |
| 745  | 147 | 4  | 7.45  | 0.9567 | 1.000 | tremors                                           |
| 5555 | 143 | 2  | 4.8   | 0.9575 | 1.000 | abnormal kidney excretion                         |
| 2622 | 116 | 3  | 6.12  | 0.9579 | 1.000 | abnormal cochlear hair cell morphology            |
| 1921 | 353 | 9  | 14.39 | 0.9591 | 1.000 | reduced fertility                                 |
| 160  | 100 | 2  | 4.61  | 0.9603 | 1.000 | kyphosis                                          |
| 2066 | 970 | 34 | 43.38 | 0.9609 | 1.000 | abnormal motor capabilities/coordination/movement |
| 2752 | 509 | 15 | 21.69 | 0.9609 | 1.000 | abnormal somatic nervous system morphology        |
| 5381 | 784 | 19 | 26.68 | 0.9635 | 1.000 | digestive/alimentary phenotype                    |
| 150  | 158 | 2  | 4.83  | 0.9649 | 1.000 | abnormal rib morphology                           |
| 5552 | 132 | 2  | 4.91  | 0.9649 | 1.000 | abnormal orbital bone morphology                  |
| 8948 | 142 | 3  | 6.46  | 0.9657 | 1.000 | decreased neuron number                           |
| 2882 | 768 | 24 | 32.68 | 0.9683 | 1.000 | abnormal neuron morphology                        |
| 1525 | 143 | 4  | 7.81  | 0.9689 | 1.000 | impaired balance                                  |
| 3491 | 737 | 24 | 32.65 | 0.9691 | 1.000 | abnormal voluntary movement                       |
| 1953 | 108 | 2  | 4.9   | 0.9691 | 1.000 | respiratory failure                               |
| 4399 | 91  | 2  | 5.06  | 0.9705 | 1.000 | abnormal cochlear outer hair cell morphology      |
| 1393 | 152 | 5  | 9.36  | 0.9741 | 1.000 | ataxia                                            |
| 955  | 175 | 3  | 6.86  | 0.9761 | 1.000 | abnormal spinal cord morphology                   |
| 5393 | 631 | 13 | 20.45 | 0.9771 | 1.000 | skin/coat/nails phenotype                         |
| 3312 | 327 | 11 | 18.46 | 0.9867 | 1.000 | abnormal locomotor coordination                   |
| 230  | 137 | 2  | 5.81  | 0.9889 | 1.000 | abnormal blood pressure                           |
| 1922 | 145 | 2  | 6.3   | 0.9919 | 1.000 | reduced male fertility                            |
| 1406 | 181 | 5  | 11.31 | 0.9923 | 1.000 | abnormal gait                                     |
| 959  | 378 | 8  | 15.42 | 0.9925 | 1.000 | abnormal somatic sensory system morphology        |
| 477  | 220 | 2  | 7.27  | 0.9963 | 1.000 | abnormal intestine morphology                     |
| 965  | 299 | 6  | 13.77 | 0.9967 | 1.000 | abnormal sensory neuron morphology                |
| 759  | 196 | 2  | 7.69  | 0.9979 | 1.000 | abnormal skeletal muscle morphology               |
| 462  | 572 | 8  | 19.23 | 0.9995 | 1.000 | abnormal digestive system morphology              |
| 3224 | 186 | 2  | 9.51  | 0.9997 | 1.000 | neuron degeneration                               |
| 2229 | 224 | 2  | 10.59 | 0.9999 | 1.000 | neurodegeneration                                 |
