# Supplementary material for: Genetic Evidence Implicates the Immune System and Cholesterol Metabolism in the Aetiology of Alzheimer's Disease
Source: PubMed Central journal article supplement (PMC2981526; doi:10.1371/journal.pone.0013950), 2010-11-15
Supplement: pone.0013950.s007.pdf [file pone.0013950.s007.pdf]

**Table S7 All genes in the immune-related categories in Table 6**

“Best p (corrected)” is the significance of the best single-SNP p-value corrected for testing multiple SNPs in a gene (allowing for LD between SNPs). “Set based p” refers to a test of whether the average single-SNP chi-squared (allelic) association statistic is significantly high (again allowing for LD between SNPs).

| Gene ID number | Gene Symbol | No. of SNPs (Harold <sup>1</sup> ) | Most Sig Assoc p-value (Harold <sup>1</sup> ) | No. of SNPs (Lambert <sup>2</sup> ) | Most Sig Assoc p-value (Lambert <sup>2</sup> ) | Corrected best p (Harold <sup>1</sup> ) | Set-based p (Harold <sup>1</sup> ) | Simes-corrected p (Lambert) |
|----------------|-------------|------------------------------------|-----------------------------------------------|-------------------------------------|------------------------------------------------|-----------------------------------------|------------------------------------|-----------------------------|
| 602            | BCL3        | 6                                  | <1.00E-10                                     | 6                                   | 1.90E-09                                       | <0.0001                                 | <0.0001                            | <0.0001                     |
| 1191           | CLU         | 15                                 | 1.40E-09                                      | 14                                  | 5.19E-08                                       | <0.0001                                 | 0.0001                             | <0.0001                     |
| 1378           | CR1         | 29                                 | 8.32E-06                                      | 29                                  | 1.03E-06                                       | 0.0002                                  | 0.0003                             | <0.0001                     |
| 3556           | IL1RAP      | 50                                 | 1.26E-05                                      | 49                                  | 9.41E-03                                       | 0.0006                                  | 0.3207                             | 0.4613                      |
| 2206           | MS4A2       | 11                                 | 5.74E-05                                      | 10                                  | 4.52E-02                                       | 0.0006                                  | 0.0010                             | 0.2109                      |
| 3123           | HLA-DRB1    | 18                                 | 1.55E-04                                      | 12                                  | 1.29E-04                                       | 0.0028                                  | 0.0010                             | 0.0011                      |
| 116449         | MIST        | 62                                 | 2.72E-04                                      | 55                                  | 8.72E-02                                       | 0.0167                                  | 0.4525                             | 0.9470                      |
| 151888         | BTLA        | 12                                 | 3.67E-04                                      | 11                                  | 6.85E-02                                       | 0.0044                                  | 0.0010                             | 0.5064                      |
| 3122           | HLA-DRA     | 50                                 | 3.92E-04                                      | 45                                  | 4.63E-04                                       | 0.0190                                  | 0.0420                             | 0.0208                      |
| 8807           | IL18RAP     | 15                                 | 3.94E-04                                      | 15                                  | 1.61E-02                                       | 0.0037                                  | 0.0004                             | 0.1480                      |
| 6318           | SERPINB4    | 5                                  | 5.05E-04                                      | 5                                   | 6.44E-01                                       | 0.0025                                  | 0.0939                             | 0.9348                      |
| 1380           | CR2         | 21                                 | 5.22E-04                                      | 21                                  | 2.10E-04                                       | 0.0083                                  | 0.0114                             | 0.0044                      |
| 8809           | IL18R1      | 16                                 | 5.42E-04                                      | 16                                  | 1.74E-02                                       | 0.0048                                  | 0.0005                             | 0.2787                      |
| 9934           | P2RY14      | 14                                 | 5.47E-04                                      | 13                                  | 1.16E-01                                       | 0.0076                                  | 0.0040                             | 0.7665                      |
| 3112           | HLA-DOB     | 75                                 | 5.64E-04                                      | 64                                  | 2.03E-03                                       | 0.0210                                  | 0.1399                             | 0.1299                      |
| 6891           | TAP2        | 97                                 | 5.64E-04                                      | 83                                  | 6.50E-03                                       | 0.0380                                  | 0.0709                             | 0.2606                      |
| 3426           | CFI         | 18                                 | 5.85E-04                                      | 18                                  | 1.01E-01                                       | 0.0105                                  | 0.0370                             | 0.8677                      |
| 9156           | EXO1        | 16                                 | 6.52E-04                                      | 19                                  | 9.65E-02                                       | 0.0104                                  | 0.0400                             | 0.7243                      |
| 11314          | CD300A      | 14                                 | 7.23E-04                                      | 13                                  | 2.20E-01                                       | 0.0080                                  | 0.0040                             | 0.9508                      |
| 6387           | CXCL12      | 18                                 | 7.41E-04                                      | 17                                  | 7.51E-03                                       | 0.0090                                  | 0.0030                             | 0.1120                      |
| 735            | C9          | 28                                 | 7.53E-04                                      | 27                                  | 3.38E-02                                       | 0.0170                                  | 0.0929                             | 0.4701                      |
| 2590           | GALNT2      | 83                                 | 7.60E-04                                      | 79                                  | 1.02E-02                                       | 0.0440                                  | 0.3516                             | 0.7473                      |
| 337            | APOA4       | 4                                  | 7.62E-04                                      | 3                                   | 3.00E-01                                       | 0.0030                                  | 0.0140                             | 0.4672                      |
| 23308          | ICOSLG      | 21                                 | 8.36E-04                                      | 19                                  | 2.21E-01                                       | 0.0174                                  | 0.0050                             | 0.8863                      |
| 9173           | IL1RL1      | 22                                 | 9.02E-04                                      | 22                                  | 1.74E-02                                       | 0.0133                                  | 0.0070                             | 0.2551                      |
| 3117           | HLA-DQA1    | 24                                 | 9.32E-04                                      | 14                                  | 6.62E-03                                       | 0.0150                                  | 0.0669                             | 0.0927                      |
| 716            | C1S         | 6                                  | 9.73E-04                                      | 6                                   | 4.55E-03                                       | 0.0051                                  | 0.0074                             | 0.0195                      |
| 23705          | CADM1       | 71                                 | 1.01E-03                                      | 69                                  | 7.10E-02                                       | 0.0691                                  | 0.4875                             | 0.7522                      |
| 10060          | ABCC9       | 75                                 | 1.05E-03                                      | 72                                  | 1.82E-02                                       | 0.0330                                  | 0.1249                             | 0.3879                      |
| 976            | CD97        | 13                                 | 1.06E-03                                      | 11                                  | 6.25E-02                                       | 0.0137                                  | 0.1568                             | 0.6873                      |
| 708            | C1QBP       | 8                                  | 1.29E-03                                      | 8                                   | 5.28E-03                                       | 0.0060                                  | 0.0330                             | 0.0422                      |
| 353514         | LILRA5      | 12                                 | 1.37E-03                                      | 11                                  | 8.09E-03                                       | 0.0110                                  | 0.0090                             | 0.0890                      |
| 11026          | LILRA3      | 10                                 | 1.37E-03                                      | 9                                   | 2.53E-02                                       | 0.0110                                  | 0.0080                             | 0.2279                      |
| 6868           | ADAM17      | 11                                 | 1.44E-03                                      | 11                                  | 3.73E-02                                       | 0.0100                                  | 0.1009                             | 0.4099                      |
| 4851           | NOTCH1      | 16                                 | 1.48E-03                                      | 14                                  | 1.41E-01                                       | 0.0233                                  | 0.0170                             | 0.9652                      |
| 8942           | KYNU        | 41                                 | 1.71E-03                                      | 40                                  | 6.91E-02                                       | 0.0679                                  | 0.5445                             | 0.6268                      |
| 356            | FASLG       | 10                                 | 1.90E-03                                      | 10                                  | 2.83E-01                                       | 0.0170                                  | 0.0060                             | 0.9338                      |
| 27159          | CHIA        | 33                                 | 1.92E-03                                      | 32                                  | 8.98E-03                                       | 0.0459                                  | 0.0380                             | 0.2307                      |
| 1604           | CD55        | 4                                  | 1.97E-03                                      | 4                                   | 4.28E-02                                       | 0.0079                                  | 0.0729                             | 0.1285                      |
| 10225          | CD96        | 18                                 | 2.01E-03                                      | 17                                  | 5.67E-02                                       | 0.0356                                  | 0.2827                             | 0.6884                      |
| 5336           | PLCG2       | 103                                | 2.03E-03                                      | 100                                 | 3.68E-03                                       | 0.1718                                  | 0.0390                             | 0.1937                      |
| 9567           | GTPBP1      | 6                                  | 2.03E-03                                      | 6                                   | 4.72E-01                                       | 0.0080                                  | 0.0190                             | 0.9761                      |
| 3981           | LIG4        | 11                                 | 2.10E-03                                      | 11                                  | 2.03E-02                                       | 0.0228                                  | 0.0250                             | 0.2055                      |
| 55824          | PAG1        | 57                                 | 2.41E-03                                      | 56                                  | 7.20E-04                                       | 0.1286                                  | 0.5295                             | 0.0403                      |
| 1394           | CRHR1       | 18                                 | 2.46E-03                                      | 17                                  | 1.87E-02                                       | 0.0430                                  | 0.0659                             | 0.1917                      |
| 730            | C7          | 40                                 | 2.47E-03                                      | 42                                  | 2.68E-03                                       | 0.0759                                  | 0.6993                             | 0.1126                      |
| 6368           | CCL23       | 10                                 | 2.64E-03                                      | 9                                   | 4.64E-03                                       | 0.0170                                  | 0.0130                             | 0.0417                      |
| 929            | CD14        | 14                                 | 2.79E-03                                      | 14                                  | 6.11E-02                                       | 0.0220                                  | 0.0260                             | 0.3346                      |
| 3550           | IK          | 13                                 | 2.79E-03                                      | 13                                  | 9.28E-02                                       | 0.0250                                  | 0.0140                             | 0.6215                      |
| 29760          | BLNK        | 25                                 | 2.88E-03                                      | 27                                  | 1.35E-02                                       | 0.0549                                  | 0.1289                             | 0.3638                      |
| 5818           | PVRL1       | 23                                 | 3.15E-03                                      | 24                                  | 1.64E-01                                       | 0.0440                                  | 0.1838                             | 0.9887                      |
| 3119           | HLA-DQB1    | 19                                 | 3.20E-03                                      | 12                                  | 6.11E-03                                       | 0.0400                                  | 0.0190                             | 0.0733                      |

|                      |     |          |     |          |        |        |        |
|----------------------|-----|----------|-----|----------|--------|--------|--------|
| 4091 SMAD6           | 34  | 3.23E-03 | 37  | 2.44E-01 | 0.1042 | 0.1768 | 0.8997 |
| 715 C1R              | 13  | 3.56E-03 | 13  | 4.55E-03 | 0.0453 | 0.0949 | 0.0591 |
| 282618 IL29          | 7   | 4.10E-03 | 6   | 1.24E-01 | 0.0240 | 0.0430 | 0.5366 |
| 340061 TMEM173       | 3   | 4.24E-03 | 3   | 2.91E-01 | 0.0120 | 0.0110 | 0.8744 |
| 596 BCL2             | 74  | 4.48E-03 | 72  | 3.09E-03 | 0.2058 | 0.2208 | 0.2222 |
| 868 CBLB             | 48  | 4.54E-03 | 46  | 2.78E-02 | 0.0929 | 0.0769 | 0.9005 |
| 55904 MLL5           | 13  | 4.69E-03 | 12  | 2.64E-02 | 0.0593 | 0.0729 | 0.1176 |
| 5788 PTPRC           | 23  | 4.99E-03 | 22  | 1.03E-02 | 0.0709 | 0.0190 | 0.2264 |
| 5971 RELB            | 6   | 5.06E-03 | 6   | 1.06E-02 | 0.0310 | 0.1069 | 0.0635 |
| 3111 HLA-DOA         | 68  | 5.18E-03 | 67  | 9.73E-04 | 0.1858 | 0.5375 | 0.0362 |
| 6957 TRB@            | 141 | 5.28E-03 | 134 | 2.74E-02 | 0.5258 | 0.5964 | 0.9445 |
| 8477 GPR65           | 11  | 5.53E-03 | 11  | 9.08E-02 | 0.0350 | 0.0270 | 0.5357 |
| 27178 IL1F7          | 13  | 5.91E-03 | 12  | 1.40E-01 | 0.0742 | 0.4366 | 0.6671 |
| 157869 RPESP         | 14  | 5.97E-03 | 13  | 2.16E-01 | 0.0804 | 0.0869 | 0.9920 |
| 4155 MBP             | 90  | 6.06E-03 | 88  | 6.37E-03 | 0.3137 | 0.1199 | 0.2534 |
| 1667 DEFA1           | 10  | 6.14E-03 | 9   | 2.12E-01 | 0.0450 | 0.0170 | 0.9314 |
| 10859 LILRB1         | 15  | 6.25E-03 | 13  | 3.98E-02 | 0.0819 | 0.1239 | 0.1864 |
| 1147 CHUK            | 8   | 6.46E-03 | 7   | 9.00E-05 | 0.0499 | 0.0979 | 0.0006 |
| 10563 CXCL13         | 18  | 6.68E-03 | 17  | 4.43E-02 | 0.1136 | 0.0899 | 0.3731 |
| 51279 C1RL           | 15  | 6.93E-03 | 15  | 4.42E-02 | 0.0991 | 0.1489 | 0.2037 |
| 3635 INPP5D          | 57  | 6.93E-03 | 51  | 2.63E-02 | 0.2488 | 0.0609 | 0.4253 |
| 10344 CCL26          | 8   | 7.10E-03 | 8   | 2.64E-01 | 0.0479 | 0.2757 | 0.5946 |
| 6369 CCL24           | 6   | 7.10E-03 | 6   | 2.47E-01 | 0.0390 | 0.0360 | 0.7441 |
| 23495 TNFRSF13B      | 25  | 7.15E-03 | 19  | 2.10E-03 | 0.1249 | 0.2867 | 0.0399 |
| 4065 LY75            | 28  | 7.16E-03 | 28  | 2.07E-02 | 0.1329 | 0.0849 | 0.2488 |
| 3394 IRF8            | 39  | 7.22E-03 | 38  | 8.94E-04 | 0.2461 | 0.1888 | 0.0271 |
| 729 C6               | 26  | 7.74E-03 | 26  | 2.19E-01 | 0.1518 | 0.3546 | 0.9445 |
| 56259 CTNBNB1        | 21  | 7.79E-03 | 21  | 1.84E-01 | 0.0759 | 0.0669 | 0.9296 |
| 100128009 LOC100128C | 36  | 7.81E-03 | 33  | 2.82E-02 | 0.5295 | 0.2947 | 0.3230 |
| 440786 LOC440786     | 22  | 7.81E-03 | 20  | 2.94E-02 | 0.1585 | 0.1988 | 0.2936 |
| 84659 RNASE7         | 18  | 7.82E-03 | 18  | 4.30E-02 | 0.1318 | 0.7702 | 0.5291 |
| 3108 HLA-DMA         | 42  | 7.97E-03 | 39  | 1.99E-02 | 0.2008 | 0.4006 | 0.7752 |
| 5698 PSMB9           | 62  | 8.05E-03 | 55  | 6.50E-03 | 0.2967 | 0.0829 | 0.1539 |
| 5696 PSMB8           | 81  | 8.05E-03 | 71  | 6.50E-03 | 0.3716 | 0.0559 | 0.2129 |
| 6890 TAP1            | 83  | 8.05E-03 | 71  | 6.50E-03 | 0.3606 | 0.0520 | 0.1987 |
| 10695 CNPY3          | 11  | 8.05E-03 | 11  | 1.78E-02 | 0.0659 | 0.0450 | 0.1732 |
| 56477 CCL28          | 9   | 8.17E-03 | 9   | 6.60E-02 | 0.0679 | 0.1698 | 0.4306 |
| 56253 CRTAM          | 21  | 8.22E-03 | 21  | 1.41E-01 | 0.1099 | 0.2667 | 0.7140 |
| 170482 CLEC4C        | 13  | 8.36E-03 | 12  | 5.72E-02 | 0.0809 | 0.1499 | 0.2608 |
| 311 ANXA11           | 24  | 8.38E-03 | 23  | 7.45E-02 | 0.1239 | 0.0639 | 1.0000 |
| 8876 VNN1            | 26  | 8.42E-03 | 25  | 9.31E-03 | 0.1973 | 0.2757 | 0.2328 |
| 3566 IL4R            | 28  | 8.44E-03 | 27  | 9.65E-02 | 0.1309 | 0.1049 | 0.8491 |
| 8600 TNFSF11         | 17  | 8.62E-03 | 18  | 5.41E-02 | 0.0919 | 0.1389 | 0.5119 |
| 10346 TRIM22         | 30  | 8.66E-03 | 28  | 3.55E-02 | 0.2297 | 0.1548 | 0.3222 |
| 10321 CRISP3         | 12  | 8.92E-03 | 11  | 6.50E-02 | 0.0699 | 0.0220 | 0.3419 |
| 9547 CXCL14          | 9   | 9.07E-03 | 9   | 2.89E-01 | 0.0788 | 0.0859 | 0.6731 |
| 5763 PTMS            | 12  | 9.18E-03 | 12  | 1.06E-01 | 0.1047 | 0.4066 | 0.9556 |
| 3574 IL7             | 19  | 9.27E-03 | 18  | 3.91E-02 | 0.0999 | 0.1329 | 0.7035 |
| 27179 IL1F6          | 7   | 9.45E-03 | 7   | 3.05E-02 | 0.0643 | 0.4196 | 0.1450 |
| 27177 IL1F8          | 14  | 9.45E-03 | 14  | 6.22E-02 | 0.1245 | 0.6044 | 0.4343 |
| 326 AIRE             | 18  | 9.52E-03 | 15  | 4.27E-03 | 0.1359 | 0.2118 | 0.0401 |
| 8878 SQSTM1          | 11  | 9.67E-03 | 12  | 2.17E-01 | 0.0859 | 0.3746 | 0.8212 |
| 2533 FYB             | 35  | 9.69E-03 | 35  | 2.64E-02 | 0.1788 | 0.2937 | 0.5339 |
| 22904 SBNO2          | 17  | 1.01E-02 | 13  | 7.51E-02 | 0.1289 | 0.0929 | 0.5525 |
| 79679 VTCN1          | 24  | 1.02E-02 | 22  | 6.38E-02 | 0.1588 | 0.5804 | 0.8000 |
| 54900 LAX1           | 7   | 1.02E-02 | 7   | 2.06E-02 | 0.0499 | 0.1139 | 0.1047 |
| 926 CD8B             | 8   | 1.04E-02 | 6   | 4.56E-01 | 0.0599 | 0.0320 | 0.7079 |
| 353376 TICAM2        | 15  | 1.06E-02 | 14  | 1.01E-02 | 0.0889 | 0.0759 | 0.1414 |
| 7409 VAV1            | 35  | 1.14E-02 | 34  | 5.67E-02 | 0.3308 | 0.2058 | 0.8857 |
| 1672 DEFB1           | 34  | 1.19E-02 | 32  | 1.88E-01 | 0.2278 | 0.0230 | 0.9570 |
| 93978 CLEC6A         | 5   | 1.21E-02 | 4   | 1.61E-01 | 0.0588 | 0.7672 | 0.2823 |
| 4437 MSH3            | 51  | 1.22E-02 | 49  | 1.34E-02 | 0.2567 | 0.3666 | 0.4369 |

|        |          |     |          |     |          |        |        |        |
|--------|----------|-----|----------|-----|----------|--------|--------|--------|
| 1521   | CTSW     | 4   | 1.23E-02 | 3   | 2.84E-01 | 0.0484 | 0.2867 | 0.4517 |
| 5079   | PAX5     | 100 | 1.23E-02 | 101 | 2.89E-02 | 0.5674 | 0.5155 | 0.8226 |
| 7157   | TP53     | 8   | 1.27E-02 | 8   | 8.99E-02 | 0.0759 | 0.3746 | 0.4565 |
| 7099   | TLR4     | 14  | 1.28E-02 | 13  | 1.62E-02 | 0.1129 | 0.4166 | 0.2109 |
| 10241  | CALCOCO2 | 15  | 1.30E-02 | 15  | 6.26E-02 | 0.0949 | 0.0470 | 0.2536 |
| 149233 | IL23R    | 32  | 1.30E-02 | 32  | 3.94E-02 | 0.1968 | 0.0559 | 0.3865 |
| 3605   | IL17A    | 21  | 1.32E-02 | 21  | 5.55E-04 | 0.1578 | 0.1369 | 0.0116 |
| 1520   | CTSS     | 4   | 1.33E-02 | 4   | 1.04E-01 | 0.0360 | 0.0649 | 0.4151 |
| 710    | SERPING1 | 13  | 1.34E-02 | 12  | 5.92E-02 | 0.1069 | 0.0490 | 0.6632 |
| 8174   | MADCAM1  | 7   | 1.36E-02 | 7   | 2.94E-02 | 0.0849 | 0.1169 | 0.1455 |
| 28454  | IGHV2-70 | 8   | 1.36E-02 | 9   | 3.25E-02 | 0.0699 | 0.0599 | 0.2929 |
| 220972 | MARCH_8  | 24  | 1.39E-02 | 23  | 4.29E-02 | 0.2078 | 0.0929 | 0.4579 |
| 58191  | CXCL16   | 17  | 1.40E-02 | 18  | 1.30E-01 | 0.2127 | 0.2517 | 0.9789 |
| 920    | CD4      | 29  | 1.41E-02 | 28  | 9.53E-02 | 0.2547 | 0.3986 | 0.8686 |
| 23547  | LILRA4   | 26  | 1.44E-02 | 24  | 2.36E-03 | 0.2208 | 0.2657 | 0.0565 |
| 3493   | IGHA1    | 1   | 1.44E-02 | 0   | N/A      | 0.0140 | 0.0140 | N/A    |
| 3500   | IGHG1    | 1   | 1.44E-02 | 0   | N/A      | 0.0140 | 0.0140 | N/A    |
| 1755   | DMBT1    | 8   | 1.46E-02 | 7   | 1.59E-01 | 0.0959 | 0.1538 | 0.6570 |
| 608    | TNFRSF17 | 10  | 1.47E-02 | 10  | 1.47E-01 | 0.1374 | 0.2178 | 0.6789 |
| 10410  | IFITM3   | 7   | 1.48E-02 | 6   | 8.65E-02 | 0.0990 | 0.4426 | 0.2755 |
| 57379  | AICDA    | 8   | 1.50E-02 | 7   | 2.11E-01 | 0.1139 | 0.0599 | 0.9563 |
| 3105   | HLA-A    | 35  | 1.58E-02 | 27  | 5.96E-02 | 0.3506 | 0.7253 | 0.6613 |
| 3075   | CFH      | 17  | 1.59E-02 | 13  | 2.31E-03 | 0.2068 | 0.2048 | 0.0300 |
| 942    | CD86     | 24  | 1.59E-02 | 23  | 5.43E-02 | 0.2587 | 0.3077 | 0.5917 |
| 64127  | NOD2     | 12  | 1.61E-02 | 12  | 1.09E-02 | 0.1768 | 0.2997 | 0.0834 |
| 3569   | IL6      | 17  | 1.61E-02 | 17  | 3.57E-02 | 0.1768 | 0.2048 | 0.3321 |
| 1511   | CTSG     | 7   | 1.64E-02 | 7   | 1.16E-01 | 0.1094 | 0.0999 | 0.8100 |
| 8698   | EDG6     | 8   | 1.64E-02 | 8   | 5.67E-02 | 0.1089 | 0.1009 | 0.3386 |
| 79465  | ULBP3    | 19  | 1.67E-02 | 17  | 2.84E-02 | 0.1958 | 0.1019 | 0.1276 |
| 3134   | HLA-F    | 34  | 1.68E-02 | 31  | 1.19E-02 | 0.4385 | 0.7203 | 0.1548 |
| 974    | CD79B    | 8   | 1.70E-02 | 8   | 2.42E-01 | 0.1089 | 0.3267 | 0.7322 |
| 1075   | CTSC     | 24  | 1.70E-02 | 24  | 1.64E-01 | 0.2418 | 0.0829 | 0.9465 |
| 3606   | IL18     | 10  | 1.71E-02 | 10  | 4.30E-03 | 0.1129 | 0.0899 | 0.0298 |
| 23601  | CLEC5A   | 7   | 1.72E-02 | 7   | 5.92E-01 | 0.1146 | 0.1898 | 0.9805 |
| 5450   | POU2AF1  | 14  | 1.73E-02 | 17  | 1.56E-01 | 0.1868 | 0.2448 | 1.0000 |
| 4277   | MICB     | 76  | 1.74E-02 | 59  | 6.88E-03 | 0.6693 | 0.3187 | 0.2075 |
| 721    | C4B      | 16  | 1.74E-02 | 16  | 2.73E-02 | 0.2455 | 0.7113 | 0.2953 |
| 717    | C2       | 35  | 1.74E-02 | 32  | 1.01E-02 | 0.2455 | 0.8861 | 0.3227 |
| 629    | CFB      | 32  | 1.74E-02 | 31  | 1.01E-02 | 0.4307 | 0.8282 | 0.3126 |
| 1880   | EBI2     | 10  | 1.77E-02 | 9   | 7.46E-02 | 0.1633 | 0.8162 | 0.4135 |
| 7518   | XRCC4    | 26  | 1.77E-02 | 29  | 4.11E-02 | 0.2647 | 0.1119 | 0.5366 |
| 5806   | PTX3     | 13  | 1.77E-02 | 13  | 1.90E-01 | 0.2073 | 0.3337 | 0.7754 |
| 366    | AQP9     | 32  | 1.82E-02 | 32  | 8.34E-02 | 0.3546 | 0.1249 | 0.7510 |
| 7097   | TLR2     | 14  | 1.83E-02 | 14  | 1.15E-01 | 0.2148 | 0.1958 | 0.9777 |
| 7049   | TGFBR3   | 78  | 1.85E-02 | 76  | 9.27E-03 | 0.7666 | 0.7882 | 0.3373 |
| 11006  | LILRB4   | 22  | 1.87E-02 | 21  | 2.82E-04 | 0.3397 | 0.2488 | 0.0041 |
| 6364   | CCL20    | 11  | 1.88E-02 | 11  | 9.36E-02 | 0.1883 | 0.1419 | 0.6239 |
| 2920   | CXCL2    | 3   | 1.89E-02 | 3   | 4.24E-01 | 0.0557 | 0.6404 | 0.4985 |
| 5648   | MASP1    | 50  | 1.90E-02 | 50  | 5.05E-02 | 0.4386 | 0.4006 | 0.9385 |
| 940    | CD28     | 10  | 1.93E-02 | 10  | 4.27E-01 | 0.1079 | 0.0540 | 0.8937 |
| 6348   | CCL3     | 14  | 1.94E-02 | 13  | 9.30E-02 | 0.1439 | 0.0599 | 0.4860 |
| 6351   | CCL4     | 10  | 1.94E-02 | 11  | 9.30E-02 | 0.1429 | 0.1319 | 0.5874 |
| 3683   | ITGAL    | 14  | 1.94E-02 | 14  | 9.13E-03 | 0.2278 | 0.4046 | 0.1279 |
| 57115  | PGLYRP4  | 15  | 1.97E-02 | 14  | 1.53E-01 | 0.1688 | 0.1768 | 0.8157 |
| 3480   | IGF1R    | 106 | 1.97E-02 | 105 | 8.82E-03 | 0.8252 | 0.1718 | 0.4619 |
| 6932   | TCF7     | 13  | 1.98E-02 | 12  | 9.73E-02 | 0.2284 | 0.2747 | 0.4900 |
| 148022 | TICAM1   | 7   | 2.02E-02 | 7   | 5.98E-02 | 0.1329 | 0.3227 | 0.4183 |
| 9450   | LY86     | 50  | 2.02E-02 | 49  | 3.07E-02 | 0.4845 | 0.4755 | 0.5672 |
| 3586   | IL10     | 18  | 2.04E-02 | 17  | 5.43E-02 | 0.2567 | 0.2627 | 0.4084 |
| 4542   | MYO1F    | 15  | 2.06E-02 | 15  | 1.33E-02 | 0.2678 | 0.2218 | 0.1706 |
| 3118   | HLA-DQA2 | 45  | 2.06E-02 | 39  | 9.01E-02 | 0.2977 | 0.1439 | 0.9681 |
| 3140   | MR1      | 13  | 2.09E-02 | 15  | 6.32E-02 | 0.2397 | 0.4795 | 0.9096 |

|        |          |     |          |     |          |        |        |        |
|--------|----------|-----|----------|-----|----------|--------|--------|--------|
| 665    | BNIP3L   | 17  | 2.11E-02 | 18  | 8.11E-02 | 0.3036 | 0.9950 | 0.5937 |
| 2113   | ETS1     | 39  | 2.14E-02 | 39  | 6.39E-03 | 0.3906 | 0.5604 | 0.2493 |
| 29949  | IL19     | 24  | 2.15E-02 | 24  | 5.01E-02 | 0.4063 | 0.3896 | 0.4547 |
| 3127   | HLA-DRB5 | 6   | 2.19E-02 | 1   | 3.76E-01 | 0.0919 | 0.1159 | 0.3760 |
| 8518   | IKBKAP   | 34  | 2.20E-02 | 34  | 9.76E-03 | 0.3367 | 0.5854 | 0.2789 |
| 6672   | SP100    | 50  | 2.21E-02 | 48  | 5.23E-03 | 0.4835 | 0.0879 | 0.1427 |
| 7293   | TNFRSF4  | 2   | 2.22E-02 | 4   | 2.15E-01 | 0.0400 | 0.0170 | 0.7624 |
| 10462  | CLEC10A  | 13  | 2.23E-02 | 13  | 4.39E-01 | 0.2168 | 0.1648 | 0.9887 |
| 720    | C4A      | 8   | 2.30E-02 | 7   | 2.52E-03 | 0.1399 | 0.2597 | 0.0177 |
| 6360   | CCL16    | 14  | 2.31E-02 | 13  | 1.57E-03 | 0.2138 | 0.0699 | 0.0204 |
| 6358   | CCL14    | 12  | 2.31E-02 | 11  | 1.57E-03 | 0.1828 | 0.0540 | 0.0173 |
| 3274   | HRH2     | 10  | 2.34E-02 | 9   | 1.77E-03 | 0.1518 | 0.2777 | 0.0159 |
| 1238   | CCBP2    | 16  | 2.37E-02 | 15  | 1.23E-02 | 0.2118 | 0.4675 | 0.1847 |
| 4261   | CIITA    | 10  | 2.39E-02 | 9   | 7.94E-03 | 0.2150 | 0.8811 | 0.0715 |
| 1233   | CCR4     | 6   | 2.41E-02 | 6   | 7.97E-02 | 0.1079 | 0.0939 | 0.3654 |
| 6359   | CCL15    | 9   | 2.41E-02 | 8   | 1.57E-03 | 0.1369 | 0.0669 | 0.0126 |
| 8808   | IL1RL2   | 33  | 2.41E-02 | 34  | 1.14E-01 | 0.5535 | 0.4515 | 0.7122 |
| 4939   | OAS2     | 20  | 2.42E-02 | 19  | 1.88E-02 | 0.3868 | 0.5664 | 0.2118 |
| 6846   | XCL2     | 11  | 2.43E-02 | 10  | 2.63E-02 | 0.2369 | 0.9880 | 0.1151 |
| 3578   | IL9      | 20  | 2.45E-02 | 21  | 9.15E-03 | 0.3447 | 0.3816 | 0.1922 |
| 3106   | HLA-B    | 49  | 2.49E-02 | 35  | 1.26E-02 | 0.5135 | 0.5025 | 0.3970 |
| 567    | B2M      | 6   | 2.49E-02 | 6   | 3.65E-02 | 0.1189 | 0.1359 | 0.2190 |
| 114771 | PGLYRP3  | 8   | 2.50E-02 | 7   | 5.04E-01 | 0.1299 | 0.1289 | 0.9606 |
| 3600   | IL15     | 14  | 2.50E-02 | 12  | 1.62E-01 | 0.2827 | 0.1788 | 0.6036 |
| 7852   | CXCR4    | 8   | 2.51E-02 | 8   | 1.17E-01 | 0.1648 | 0.1469 | 0.7892 |
| 8631   | SKAP1    | 32  | 2.52E-02 | 33  | 3.41E-01 | 0.3337 | 0.0719 | 0.9774 |
| 7942   | TFEB     | 22  | 2.53E-02 | 23  | 7.27E-02 | 0.3417 | 0.4116 | 0.8683 |
| 5008   | OSM      | 14  | 2.55E-02 | 13  | 2.30E-03 | 0.3035 | 0.9251 | 0.0168 |
| 8530   | CST7     | 6   | 2.57E-02 | 6   | 2.23E-01 | 0.1447 | 0.8292 | 0.9652 |
| 8915   | BCL10    | 16  | 2.58E-02 | 16  | 8.83E-02 | 0.2298 | 0.1409 | 0.5790 |
| 4860   | NP       | 13  | 2.59E-02 | 13  | 1.14E-01 | 0.2597 | 0.5075 | 0.8349 |
| 7098   | TLR3     | 15  | 2.60E-02 | 16  | 1.39E-01 | 0.2587 | 0.3137 | 0.8794 |
| 563    | AZGP1    | 6   | 2.62E-02 | 6   | 5.94E-02 | 0.1473 | 0.2398 | 0.1803 |
| 909    | CD1A     | 3   | 2.65E-02 | 4   | 5.50E-01 | 0.0775 | 0.5105 | 0.7124 |
| 83417  | FCRL4    | 11  | 2.68E-02 | 11  | 2.24E-01 | 0.1489 | 0.1169 | 0.9388 |
| 718    | C3       | 20  | 2.71E-02 | 21  | 6.13E-02 | 0.4233 | 0.9670 | 0.8712 |
| 3848   | KRT1     | 17  | 2.76E-02 | 19  | 1.79E-01 | 0.3696 | 0.7712 | 0.9920 |
| 5996   | RGS1     | 20  | 2.79E-02 | 19  | 1.66E-01 | 0.4316 | 0.3976 | 0.9535 |
| 56241  | SUSD2    | 4   | 2.80E-02 | 3   | 2.97E-01 | 0.1074 | 0.2657 | 0.5185 |
| 386653 | IL31     | 9   | 2.80E-02 | 9   | 2.82E-01 | 0.1748 | 0.2827 | 0.8273 |
| 11027  | LILRA2   | 8   | 2.81E-02 | 9   | 8.13E-05 | 0.2038 | 0.4436 | 0.0007 |
| 3553   | IL1B     | 11  | 2.86E-02 | 10  | 1.42E-01 | 0.2368 | 0.3896 | 0.9601 |
| 10417  | SPON2    | 7   | 2.88E-02 | 5   | 9.15E-02 | 0.1850 | 0.4296 | 0.2630 |
| 2634   | GBP2     | 13  | 2.90E-02 | 11  | 5.99E-01 | 0.3180 | 0.5055 | 0.9822 |
| 4973   | OLR1     | 17  | 2.93E-02 | 16  | 1.70E-01 | 0.2637 | 0.2687 | 0.8573 |
| 84876  | ORAI1    | 7   | 2.93E-02 | 6   | 1.93E-01 | 0.1059 | 0.2757 | 0.6339 |
| 81035  | COLEC12  | 109 | 2.94E-02 | 105 | 1.75E-02 | 0.9041 | 0.9321 | 0.5783 |
| 2669   | GEM      | 17  | 2.96E-02 | 17  | 9.31E-02 | 0.4004 | 0.3157 | 0.8828 |
| 9755   | TBKBP1   | 6   | 3.01E-02 | 6   | 2.17E-02 | 0.1349 | 0.0410 | 0.0790 |
| 3567   | IL5      | 7   | 3.10E-02 | 7   | 3.13E-01 | 0.1419 | 0.1658 | 0.7352 |
| 8764   | TNFRSF14 | 7   | 3.11E-02 | 6   | 2.96E-02 | 0.1329 | 0.1379 | 0.1081 |
| 8542   | APOL1    | 19  | 3.12E-02 | 19  | 1.17E-01 | 0.3576 | 0.6583 | 0.4540 |
| 27343  | POLL     | 5   | 3.13E-02 | 5   | 4.25E-02 | 0.1469 | 0.2917 | 0.2126 |
| 6357   | CCL13    | 9   | 3.14E-02 | 8   | 9.72E-02 | 0.1918 | 0.3297 | 0.7192 |
| 6346   | CCL1     | 11  | 3.14E-02 | 10  | 9.72E-02 | 0.2338 | 0.4256 | 0.7684 |
| 3559   | IL2RA    | 55  | 3.15E-02 | 57  | 2.79E-02 | 0.6723 | 0.3457 | 0.5878 |
| 7441   | VPREB1   | 12  | 3.16E-02 | 11  | 1.56E-01 | 0.2058 | 0.3976 | 0.7868 |
| 10814  | CPLX2    | 48  | 3.18E-02 | 45  | 4.39E-04 | 0.5524 | 0.6134 | 0.0109 |
| 2213   | FCGR2B   | 9   | 3.18E-02 | 9   | 1.89E-01 | 0.2524 | 0.3616 | 0.7577 |
| 1401   | CRP      | 6   | 3.22E-02 | 6   | 2.14E-01 | 0.1449 | 0.1049 | 0.6561 |
| 55122  | C6orf166 | 18  | 3.23E-02 | 20  | 3.58E-03 | 0.4466 | 0.7353 | 0.0610 |
| 64421  | DCLRE1C  | 12  | 3.24E-02 | 11  | 2.79E-01 | 0.2118 | 0.1049 | 0.6509 |

|        |          |    |          |    |          |        |        |        |
|--------|----------|----|----------|----|----------|--------|--------|--------|
| 3109   | HLA-DMB  | 42 | 3.25E-02 | 39 | 1.99E-02 | 0.7502 | 0.7373 | 0.7752 |
| 924    | CD7      | 4  | 3.32E-02 | 5  | 4.54E-02 | 0.1039 | 0.1668 | 0.2270 |
| 54     | ACP5     | 8  | 3.42E-02 | 8  | 9.15E-02 | 0.2431 | 0.3457 | 0.4344 |
| 939    | CD27     | 17 | 3.53E-02 | 18 | 1.04E-01 | 0.3866 | 0.7173 | 0.9822 |
| 1584   | CYP11B1  | 9  | 3.55E-02 | 8  | 1.31E-01 | 0.2774 | 0.6673 | 0.2675 |
| 84955  | NUDCD1   | 7  | 3.55E-02 | 5  | 2.51E-02 | 0.2236 | 0.6813 | 0.1257 |
| 91543  | RSAD2    | 10 | 3.57E-02 | 9  | 1.30E-01 | 0.3046 | 0.1489 | 0.9522 |
| 3636   | INPPL1   | 8  | 3.59E-02 | 6  | 1.73E-02 | 0.1908 | 0.2038 | 0.1036 |
| 6355   | CCL8     | 15 | 3.61E-02 | 16 | 1.27E-01 | 0.2727 | 0.1888 | 0.7911 |
| 6356   | CCL11    | 13 | 3.61E-02 | 14 | 1.18E-01 | 0.2498 | 0.1109 | 0.9057 |
| 10333  | TLR6     | 4  | 3.62E-02 | 6  | 5.16E-01 | 0.1039 | 0.0599 | 0.7712 |
| 6668   | SP2      | 8  | 3.64E-02 | 8  | 4.44E-01 | 0.1888 | 0.2048 | 0.7868 |
| 3001   | GZMA     | 13 | 3.67E-02 | 11 | 3.27E-01 | 0.3853 | 0.5854 | 0.8810 |
| 56300  | IL1F9    | 9  | 3.68E-02 | 8  | 3.05E-02 | 0.2863 | 0.5345 | 0.1736 |
| 1535   | CYBA     | 9  | 3.70E-02 | 10 | 4.39E-02 | 0.2737 | 0.2038 | 0.2728 |
| 2204   | FCAR     | 8  | 3.71E-02 | 9  | 6.25E-01 | 0.1958 | 0.4376 | 0.9528 |
| 657    | BMPR1A   | 26 | 3.72E-02 | 28 | 5.01E-02 | 0.3846 | 0.3896 | 0.4195 |
| 127544 | RNF19B   | 11 | 3.74E-02 | 10 | 1.84E-01 | 0.3422 | 0.9560 | 0.4911 |
| 50852  | TRAT1    | 20 | 3.75E-02 | 20 | 2.17E-01 | 0.4346 | 0.6793 | 0.9439 |
| 26253  | CLEC4E   | 15 | 3.76E-02 | 15 | 3.77E-02 | 0.4370 | 0.2947 | 0.5660 |
| 10332  | CLEC4M   | 21 | 3.77E-02 | 19 | 1.76E-03 | 0.5536 | 0.7752 | 0.0334 |
| 7040   | TGFB1    | 8  | 3.78E-02 | 8  | 1.10E-01 | 0.2547 | 0.6004 | 0.4499 |
| 8741   | TNFSF13  | 11 | 3.82E-02 | 11 | 2.58E-01 | 0.2198 | 0.0889 | 0.9617 |
| 8742   | TNFSF12  | 10 | 3.82E-02 | 10 | 5.35E-02 | 0.2048 | 0.1059 | 0.5349 |
| 1493   | CTLA4    | 7  | 3.84E-02 | 7  | 3.11E-01 | 0.1908 | 0.3247 | 0.7491 |
| 5393   | EXOSC9   | 8  | 3.88E-02 | 7  | 4.87E-01 | 0.2328 | 0.3536 | 0.8734 |
| 3588   | IL10RB   | 18 | 3.89E-02 | 18 | 5.26E-02 | 0.4426 | 0.6763 | 0.6722 |
| 6480   | ST6GAL1  | 66 | 3.91E-02 | 67 | 9.56E-03 | 0.8052 | 0.8262 | 0.3834 |
| 51752  | ERAP1    | 38 | 3.95E-02 | 38 | 2.90E-02 | 0.7840 | 0.9820 | 0.8533 |
| 80380  | PDCD1LG2 | 26 | 3.95E-02 | 25 | 2.02E-02 | 0.5005 | 0.8691 | 0.1755 |
| 353091 | RAET1G   | 8  | 3.98E-02 | 7  | 1.98E-02 | 0.2773 | 0.1149 | 0.1389 |
| 80328  | ULBP2    | 7  | 3.98E-02 | 8  | 1.98E-02 | 0.2468 | 0.4206 | 0.1588 |
| 28577  | TRBV12-3 | 12 | 4.00E-02 | 12 | 4.82E-02 | 0.3870 | 0.5175 | 0.5779 |
| 3681   | ITGAD    | 9  | 4.00E-02 | 9  | 1.20E-01 | 0.2028 | 0.1728 | 0.9157 |
| 2643   | GCH1     | 10 | 4.00E-02 | 10 | 1.47E-02 | 0.2637 | 0.1439 | 0.1471 |
| 8993   | PGLYRP1  | 12 | 4.03E-02 | 10 | 1.65E-01 | 0.3337 | 0.5435 | 0.6088 |
| 3576   | IL8      | 4  | 4.09E-02 | 4  | 4.05E-01 | 0.1539 | 0.2537 | 0.7883 |
| 60489  | APOBEC3G | 7  | 4.16E-02 | 6  | 6.59E-02 | 0.2572 | 0.6643 | 0.3955 |
| 683    | BST1     | 31 | 4.17E-02 | 31 | 7.15E-02 | 0.7328 | 0.5724 | 0.9106 |
| 6938   | TCF12    | 52 | 4.22E-02 | 45 | 2.84E-03 | 0.5245 | 0.2817 | 0.1278 |
| 4843   | NOS2A    | 21 | 4.23E-02 | 19 | 1.17E-02 | 0.5967 | 0.4765 | 0.2218 |
| 54878  | DPP8     | 10 | 4.24E-02 | 7  | 1.74E-01 | 0.2488 | 0.2018 | 0.7287 |
| 6814   | STXBP3   | 19 | 4.25E-02 | 19 | 2.20E-03 | 0.3596 | 0.1698 | 0.0250 |
| 6370   | CCL25    | 19 | 4.28E-02 | 17 | 1.50E-02 | 0.4006 | 0.6833 | 0.2558 |
| 1241   | LTB4R    | 12 | 4.30E-02 | 13 | 6.55E-03 | 0.3596 | 0.4995 | 0.0852 |
| 5468   | PPARG    | 35 | 4.40E-02 | 34 | 6.12E-03 | 0.5385 | 0.8851 | 0.2080 |
| 6935   | ZEB1     | 13 | 4.45E-02 | 16 | 1.02E-01 | 0.3177 | 0.1089 | 0.7613 |
| 5553   | PRG2     | 7  | 4.49E-02 | 8  | 5.77E-03 | 0.1978 | 0.1558 | 0.0215 |
| 10394  | PRG3     | 8  | 4.49E-02 | 9  | 7.47E-03 | 0.2198 | 0.1678 | 0.0363 |
| 6354   | CCL7     | 12 | 4.50E-02 | 12 | 1.18E-01 | 0.3017 | 0.1928 | 0.8225 |
| 4282   | MIF      | 18 | 4.54E-02 | 18 | 3.17E-01 | 0.4056 | 0.8302 | 0.8947 |
| 6362   | CCL18    | 12 | 4.56E-02 | 11 | 8.99E-02 | 0.2747 | 0.0619 | 0.3564 |
| 944    | TNFSF8   | 20 | 4.57E-02 | 18 | 2.30E-01 | 0.6072 | 0.7303 | 0.7482 |
| 3903   | LAIR1    | 24 | 4.59E-02 | 21 | 2.36E-03 | 0.5744 | 0.6284 | 0.0495 |
| 50856  | CLEC4A   | 14 | 4.64E-02 | 14 | 8.57E-03 | 0.3027 | 0.3686 | 0.1200 |
| 10512  | SEMA3C   | 37 | 4.65E-02 | 38 | 1.48E-02 | 0.6394 | 0.3896 | 0.2850 |
| 10164  | CHST4    | 13 | 4.70E-02 | 12 | 3.02E-04 | 0.3976 | 0.5475 | 0.0036 |
| 3603   | IL16     | 29 | 4.71E-02 | 27 | 8.47E-02 | 0.5425 | 0.3566 | 0.8219 |
| 159296 | NKX2-3   | 5  | 4.71E-02 | 5  | 1.72E-01 | 0.2144 | 0.5654 | 0.3533 |
| 6363   | CCL19    | 7  | 4.80E-02 | 7  | 2.28E-01 | 0.2567 | 0.2108 | 0.9761 |
| 6366   | CCL21    | 6  | 4.80E-02 | 6  | 3.26E-02 | 0.2188 | 0.2218 | 0.1956 |
| 6965   | TRG@     | 57 | 4.82E-02 | 57 | 4.34E-02 | 0.8332 | 0.9131 | 1.0000 |

|                 |    |          |    |          |        |        |        |
|-----------------|----|----------|----|----------|--------|--------|--------|
| 2207 FCER1G     | 16 | 4.88E-02 | 16 | 1.24E-02 | 0.4086 | 0.3906 | 0.1981 |
| 6347 CCL2       | 9  | 4.96E-02 | 9  | 1.97E-01 | 0.2777 | 0.2478 | 0.8225 |
| 27040 LAT       | 8  | 5.02E-02 | 11 | 1.43E-01 | NS     | NS     | 0.7661 |
| 4179 CD46       | 10 | 5.04E-02 | 9  | 3.11E-01 | NS     | NS     | 0.7575 |
| 3077 HFE        | 16 | 5.06E-02 | 17 | 3.19E-01 | NS     | NS     | 0.9552 |
| 28639 TRBC1     | 8  | 5.06E-02 | 8  | 3.09E-01 | NS     | NS     | 0.7662 |
| 3557 IL1RN      | 11 | 5.06E-02 | 10 | 3.11E-01 | NS     | NS     | 0.7483 |
| 1675 CFD        | 11 | 5.23E-02 | 9  | 3.99E-02 | NS     | NS     | 0.3592 |
| 387357 C6orf190 | 49 | 5.26E-02 | 45 | 2.67E-02 | NS     | NS     | 0.6446 |
| 2537 IFI6       | 5  | 5.27E-02 | 5  | 3.54E-01 | NS     | NS     | 0.8818 |
| 135250 RAET1E   | 7  | 5.34E-02 | 7  | 3.03E-01 | NS     | NS     | 0.7088 |
| 27240 SIT1      | 11 | 5.34E-02 | 11 | 6.25E-03 | NS     | NS     | 0.0687 |
| 731 C8A         | 21 | 5.35E-02 | 21 | 2.59E-01 | NS     | NS     | 0.8884 |
| 201294 UNC13D   | 8  | 5.39E-02 | 7  | 2.08E-01 | NS     | NS     | 0.5564 |
| 57506 VISA      | 16 | 5.43E-02 | 16 | 7.29E-02 | NS     | NS     | 0.5537 |
| 6375 XCL1       | 13 | 5.47E-02 | 9  | 3.17E-01 | NS     | NS     | 0.9805 |
| 4057 LTF        | 10 | 5.56E-02 | 10 | 2.25E-01 | NS     | NS     | 0.5083 |
| 10288 LILRB2    | 9  | 5.60E-02 | 7  | 2.75E-01 | NS     | NS     | 0.6971 |
| 2219 FCN1       | 17 | 5.61E-02 | 16 | 1.95E-02 | NS     | NS     | 0.1573 |
| 7100 TLR5       | 5  | 5.65E-02 | 5  | 3.29E-01 | NS     | NS     | 0.6300 |
| 1240 CMKLR1     | 21 | 5.66E-02 | 23 | 2.10E-03 | NS     | NS     | 0.0298 |
| 722 C4BPA       | 13 | 5.69E-02 | 13 | 8.46E-02 | NS     | NS     | 0.5627 |
| 11151 CORO1A    | 1  | 5.72E-02 | 1  | 7.35E-01 | NS     | NS     | 0.7347 |
| 6441 SFTPD      | 18 | 5.72E-02 | 17 | 1.43E-01 | NS     | NS     | 0.5823 |
| 4049 LTA        | 31 | 5.75E-02 | 32 | 2.82E-03 | NS     | NS     | 0.0901 |
| 7124 TNF        | 30 | 5.75E-02 | 30 | 1.44E-02 | NS     | NS     | 0.3325 |
| 4783 NFIL3      | 13 | 5.83E-02 | 13 | 3.21E-02 | NS     | NS     | 0.4169 |
| 2956 MSH6       | 14 | 5.83E-02 | 14 | 6.99E-02 | NS     | NS     | 0.3649 |
| 10148 EBI3      | 8  | 5.84E-02 | 7  | 3.39E-01 | NS     | NS     | 0.9920 |
| 8909 P11        | 9  | 5.87E-02 | 9  | 1.09E-01 | NS     | NS     | 0.8428 |
| 23075 SWAP70    | 17 | 6.02E-02 | 17 | 7.79E-02 | NS     | NS     | 0.5102 |
| 3113 HLA-DPA1   | 45 | 6.03E-02 | 41 | 6.57E-04 | NS     | NS     | 0.0264 |
| 8995 TNFSF18    | 3  | 6.07E-02 | 3  | 2.19E-01 | NS     | NS     | 0.5092 |
| 7837 PXDN       | 41 | 6.13E-02 | 40 | 4.41E-03 | NS     | NS     | 0.1764 |
| 2921 CXCL3      | 3  | 6.16E-02 | 3  | 4.42E-01 | NS     | NS     | 0.8423 |
| 5167 ENPP1      | 30 | 6.21E-02 | 30 | 1.37E-02 | NS     | NS     | 0.4105 |
| 2220 FCN2       | 20 | 6.26E-02 | 19 | 1.95E-02 | NS     | NS     | 0.3698 |
| 3929 LBP        | 17 | 6.36E-02 | 19 | 2.21E-02 | NS     | NS     | 0.4198 |
| 10261 IGSF6     | 6  | 6.53E-02 | 5  | 4.36E-02 | NS     | NS     | 0.1034 |
| 1235 CCR6       | 38 | 6.53E-02 | 36 | 6.94E-02 | NS     | NS     | 0.5929 |
| 5724 PTAFR      | 7  | 6.57E-02 | 7  | 3.12E-01 | NS     | NS     | 0.6586 |
| 4683 NBN        | 15 | 6.68E-02 | 15 | 1.42E-01 | NS     | NS     | 0.7060 |
| 725 C4BPB       | 11 | 6.70E-02 | 11 | 8.46E-02 | NS     | NS     | 0.4761 |
| 154064 RAET1L   | 7  | 6.75E-02 | 6  | 1.98E-02 | NS     | NS     | 0.1186 |
| 2821 GPI        | 4  | 6.76E-02 | 4  | 1.12E-01 | NS     | NS     | 0.1757 |
| 3494 IGHA2      | 7  | 6.79E-02 | 4  | 3.16E-01 | NS     | NS     | 0.7010 |
| 3497 IGHE       | 5  | 6.79E-02 | 4  | 3.16E-01 | NS     | NS     | 0.7010 |
| 654 BMP6        | 54 | 6.90E-02 | 54 | 6.75E-02 | NS     | NS     | 0.7881 |
| 3592 IL12A      | 18 | 6.95E-02 | 17 | 6.63E-02 | NS     | NS     | 0.6174 |
| 5169 ENPP3      | 25 | 6.95E-02 | 27 | 1.15E-02 | NS     | NS     | 0.2571 |
| 25939 SAMHD1    | 14 | 7.04E-02 | 13 | 8.78E-02 | NS     | NS     | 0.8518 |
| 4688 NCF2       | 10 | 7.06E-02 | 10 | 1.39E-02 | NS     | NS     | 0.1338 |
| 733 C8G         | 5  | 7.08E-02 | 4  | 3.05E-01 | NS     | NS     | 0.6544 |
| 7292 TNFSF4     | 12 | 7.11E-02 | 12 | 5.05E-02 | NS     | NS     | 0.6061 |
| 84639 IL1F10    | 25 | 7.14E-02 | 24 | 1.21E-02 | NS     | NS     | 0.2903 |
| 7433 VIPR1      | 14 | 7.16E-02 | 16 | 1.39E-01 | NS     | NS     | 0.9620 |
| 9966 TNFSF15    | 11 | 7.18E-02 | 10 | 1.06E-01 | NS     | NS     | 0.9691 |
| 3554 IL1R1      | 43 | 7.19E-02 | 43 | 2.89E-02 | NS     | NS     | 0.4956 |
| 9235 IL32       | 10 | 7.19E-02 | 7  | 3.20E-01 | NS     | NS     | 0.7758 |
| 727 C5          | 32 | 7.25E-02 | 29 | 1.13E-02 | NS     | NS     | 0.2459 |
| 355 FAS         | 25 | 7.28E-02 | 24 | 2.69E-01 | NS     | NS     | 0.8927 |
| 2635 GBP3       | 14 | 7.40E-02 | 14 | 4.46E-01 | NS     | NS     | 0.9652 |

|           |            |    |          |    |          |    |    |        |
|-----------|------------|----|----------|----|----------|----|----|--------|
| 4938      | OAS1       | 10 | 7.44E-02 | 9  | 5.60E-02 | NS | NS | 0.2880 |
| 3107      | HLA-C      | 57 | 7.46E-02 | 44 | 6.39E-02 | NS | NS | 0.9013 |
| 6278      | S100A7     | 9  | 7.57E-02 | 9  | 3.60E-01 | NS | NS | 0.9502 |
| 3503      | IGHG4      | 2  | 7.60E-02 | 2  | 4.91E-01 | NS | NS | 0.5312 |
| 64581     | CLEC7A     | 15 | 7.64E-02 | 15 | 1.01E-01 | NS | NS | 0.5499 |
| 4940      | OAS3       | 15 | 7.67E-02 | 15 | 5.60E-02 | NS | NS | 0.3385 |
| 3543      | IGLL1      | 15 | 7.74E-02 | 14 | 1.49E-01 | NS | NS | 0.6412 |
| 54941     | RNF125     | 18 | 7.75E-02 | 15 | 2.93E-02 | NS | NS | 0.3877 |
| 8740      | TNFSF14    | 11 | 7.80E-02 | 11 | 6.13E-02 | NS | NS | 0.6744 |
| 2161      | F12        | 4  | 7.88E-02 | 4  | 5.85E-02 | NS | NS | 0.2340 |
| 10673     | TNFSF13B   | 13 | 7.98E-02 | 14 | 2.20E-01 | NS | NS | 0.9887 |
| 6372      | CXCL6      | 3  | 8.09E-02 | 3  | 1.43E-01 | NS | NS | 0.4303 |
| 5197      | PF4V1      | 8  | 8.09E-02 | 8  | 2.86E-02 | NS | NS | 0.2274 |
| 2919      | CXCL1      | 12 | 8.09E-02 | 12 | 2.86E-02 | NS | NS | 0.2274 |
| 2633      | GBP1       | 13 | 8.15E-02 | 13 | 4.26E-01 | NS | NS | 0.9652 |
| 83953     | FCAMR      | 10 | 8.20E-02 | 10 | 1.74E-01 | NS | NS | 0.7324 |
| 26525     | IL1F5      | 21 | 8.23E-02 | 21 | 1.21E-02 | NS | NS | 0.2540 |
| 5196      | PF4        | 6  | 8.58E-02 | 5  | 5.34E-02 | NS | NS | 0.2159 |
| 5473      | PPBP       | 7  | 8.58E-02 | 6  | 2.72E-03 | NS | NS | 0.0163 |
| 3329      | HSPD1      | 3  | 8.64E-02 | 3  | 3.84E-01 | NS | NS | 0.6804 |
| 1230      | CCR1       | 4  | 8.65E-02 | 6  | 1.39E-01 | NS | NS | 0.6415 |
| 931       | MS4A1      | 24 | 8.65E-02 | 23 | 1.22E-01 | NS | NS | 0.8264 |
| 338339    | CLEC4D     | 11 | 8.66E-02 | 11 | 3.77E-02 | NS | NS | 0.4151 |
| 3937      | LCP2       | 19 | 8.66E-02 | 20 | 1.54E-01 | NS | NS | 0.9056 |
| 1118      | CHIT1      | 25 | 8.70E-02 | 25 | 6.37E-02 | NS | NS | 0.8251 |
| 359710    | C20orf185  | 18 | 8.76E-02 | 18 | 8.15E-02 | NS | NS | 0.7996 |
| 100       | ADA        | 12 | 8.78E-02 | 10 | 2.73E-02 | NS | NS | 0.2729 |
| 732       | C8B        | 13 | 8.88E-02 | 13 | 1.58E-01 | NS | NS | 0.5897 |
| 10964     | IFI44L     | 10 | 8.95E-02 | 10 | 1.03E-01 | NS | NS | 0.4552 |
| 9308      | CD83       | 12 | 9.02E-02 | 11 | 9.43E-02 | NS | NS | 0.6732 |
| 10544     | PROCR      | 6  | 9.02E-02 | 5  | 1.88E-01 | NS | NS | 0.3384 |
| 10803     | CCR9       | 13 | 9.05E-02 | 13 | 1.19E-01 | NS | NS | 0.7823 |
| 342510    | CD300E     | 15 | 9.08E-02 | 15 | 9.82E-02 | NS | NS | 0.8057 |
| 5319      | PLA2G1B    | 7  | 9.14E-02 | 7  | 1.85E-01 | NS | NS | 0.4581 |
| 345611    | IRGM       | 7  | 9.17E-02 | 8  | 1.37E-01 | NS | NS | 0.3791 |
| 10087     | COL4A3BP   | 10 | 9.22E-02 | 9  | 2.20E-01 | NS | NS | 0.7694 |
| 259197    | NCR3       | 27 | 9.34E-02 | 26 | 1.44E-02 | NS | NS | 0.3106 |
| 4050      | LTB        | 31 | 9.34E-02 | 30 | 1.44E-02 | NS | NS | 0.3325 |
| 7940      | LST1       | 28 | 9.34E-02 | 27 | 1.44E-02 | NS | NS | 0.3225 |
| 203068    | TUBB       | 33 | 9.39E-02 | 37 | 3.57E-02 | NS | NS | 1.0000 |
| 29126     | CD274      | 23 | 9.47E-02 | 21 | 6.60E-02 | NS | NS | 0.9453 |
| 54210     | TREM1      | 12 | 9.52E-02 | 13 | 1.69E-02 | NS | NS | 0.1380 |
| 4689      | NCF4       | 26 | 9.52E-02 | 25 | 3.71E-02 | NS | NS | 0.9267 |
| 3593      | IL12B      | 13 | 9.58E-02 | 13 | 1.18E-01 | NS | NS | 0.6010 |
| 64167     | ERAP2      | 16 | 9.61E-02 | 16 | 2.01E-01 | NS | NS | 0.9311 |
| 11251     | GPR44      | 8  | 9.75E-02 | 8  | 1.40E-01 | NS | NS | 0.5455 |
| 6622      | SNCA       | 27 | 9.75E-02 | 23 | 4.79E-02 | NS | NS | 0.5530 |
| 114770    | PGLYRP2    | 7  | 9.78E-02 | 7  | 6.42E-02 | NS | NS | 0.4496 |
| 29110     | TBK1       | 12 | 9.82E-02 | 11 | 3.67E-01 | NS | NS | 0.9242 |
| 913       | CD1E       | 7  | 9.87E-02 | 6  | 3.30E-01 | NS | NS | 0.8234 |
| 7850      | IL1R2      | 59 | 1.00E-01 | 56 | 2.03E-01 | NS | NS | 0.6313 |
| 10747     | MASP2      | 7  | 1.01E-01 | 7  | 8.65E-02 | NS | NS | 0.5419 |
| 81494     | CFHR5      | 7  | 1.01E-01 | 6  | 1.48E-01 | NS | NS | 0.5609 |
| 23545     | ATP6V0A2   | 13 | 1.01E-01 | 12 | 3.94E-01 | NS | NS | 1.0000 |
| 10850     | CCL27      | 7  | 1.02E-01 | 7  | 4.68E-01 | NS | NS | 0.9188 |
| 3570      | IL6R       | 11 | 1.02E-01 | 11 | 3.44E-01 | NS | NS | 0.9805 |
| 3135      | HLA-G      | 55 | 1.04E-01 | 53 | 1.74E-02 | NS | NS | 0.6223 |
| 2152      | F3         | 10 | 1.05E-01 | 10 | 2.61E-01 | NS | NS | 0.9662 |
| 51297     | PLUNC      | 7  | 1.05E-01 | 8  | 1.27E-01 | NS | NS | 0.9521 |
| 8638      | OASL       | 16 | 1.05E-01 | 16 | 1.43E-01 | NS | NS | 0.8213 |
| 100131439 | LOC1001314 | 16 | 1.05E-01 | 16 | 9.82E-02 | NS | NS | 0.5449 |
| 6374      | CXCL5      | 8  | 1.05E-01 | 7  | 2.72E-03 | NS | NS | 0.0191 |

|        |          |    |          |    |          |    |    |        |
|--------|----------|----|----------|----|----------|----|----|--------|
| 970    | CD70     | 12 | 1.06E-01 | 12 | 1.10E-01 | NS | NS | 0.7738 |
| 1051   | CEBPB    | 4  | 1.08E-01 | 4  | 3.36E-01 | NS | NS | 0.7966 |
| 81793  | TLR10    | 14 | 1.08E-01 | 15 | 1.66E-01 | NS | NS | 1.0000 |
| 54472  | TOLLIP   | 10 | 1.09E-01 | 10 | 9.73E-02 | NS | NS | 0.8812 |
| 4985   | OPRD1    | 15 | 1.11E-01 | 15 | 4.46E-03 | NS | NS | 0.0669 |
| 79168  | LILRA6   | 8  | 1.12E-01 | 11 | 3.18E-01 | NS | NS | 0.8678 |
| 7535   | ZAP70    | 16 | 1.12E-01 | 15 | 9.78E-02 | NS | NS | 0.5872 |
| 11025  | LILRB3   | 6  | 1.12E-01 | 11 | 1.22E-01 | NS | NS | 0.9321 |
| 114609 | TIRAP    | 13 | 1.13E-01 | 13 | 3.50E-03 | NS | NS | 0.0455 |
| 57823  | SLAMF7   | 6  | 1.13E-01 | 6  | 8.30E-03 | NS | NS | 0.0498 |
| 9641   | IKBKE    | 16 | 1.13E-01 | 14 | 1.20E-01 | NS | NS | 0.7326 |
| 11024  | LILRA1   | 8  | 1.14E-01 | 9  | 8.13E-05 | NS | NS | 0.0007 |
| 5897   | RAG2     | 5  | 1.15E-01 | 5  | 1.15E-02 | NS | NS | 0.0575 |
| 163351 | GBP6     | 14 | 1.15E-01 | 12 | 1.33E-01 | NS | NS | 0.6179 |
| 29851  | ICOS     | 10 | 1.15E-01 | 12 | 1.57E-01 | NS | NS | 0.9748 |
| 54923  | LIME1    | 7  | 1.16E-01 | 4  | 5.42E-01 | NS | NS | 0.9117 |
| 146894 | CD300LG  | 4  | 1.16E-01 | 4  | 3.56E-01 | NS | NS | 0.6393 |
| 59307  | SIGIRR   | 10 | 1.16E-01 | 4  | 6.53E-01 | NS | NS | 1.0000 |
| 51441  | YTHDF2   | 7  | 1.17E-01 | 6  | 1.94E-02 | NS | NS | 0.1164 |
| 3115   | HLA-DPB1 | 46 | 1.19E-01 | 45 | 9.17E-02 | NS | NS | 0.9528 |
| 133396 | IL31RA   | 20 | 1.20E-01 | 21 | 1.57E-01 | NS | NS | 0.8489 |
| 51295  | ECSIT    | 5  | 1.20E-01 | 5  | 1.78E-01 | NS | NS | 0.6308 |
| 6813   | STXBP2   | 4  | 1.20E-01 | 3  | 6.04E-02 | NS | NS | 0.1811 |
| 4063   | LY9      | 12 | 1.23E-01 | 12 | 1.30E-02 | NS | NS | 0.0668 |
| 6376   | CX3CL1   | 11 | 1.25E-01 | 11 | 1.65E-01 | NS | NS | 0.7096 |
| 6367   | CCL22    | 11 | 1.25E-01 | 12 | 1.65E-01 | NS | NS | 0.6429 |
| 3764   | KCNJ8    | 1  | 1.25E-01 | 1  | 3.79E-02 | NS | NS | 0.0379 |
| 6398   | SECTM1   | 4  | 1.25E-01 | 5  | 6.39E-01 | NS | NS | 0.8731 |
| 6892   | TAPBP    | 9  | 1.26E-01 | 9  | 7.64E-02 | NS | NS | 0.6874 |
| 23643  | LY96     | 11 | 1.29E-01 | 11 | 3.08E-02 | NS | NS | 0.2139 |
| 8482   | SEMA7A   | 13 | 1.32E-01 | 12 | 2.21E-02 | NS | NS | 0.2500 |
| 9466   | IL27RA   | 4  | 1.35E-01 | 4  | 5.82E-01 | NS | NS | 0.8824 |
| 8547   | FCN3     | 6  | 1.36E-01 | 6  | 6.68E-01 | NS | NS | 0.9283 |
| 4064   | CD180    | 10 | 1.37E-01 | 12 | 2.73E-01 | NS | NS | 0.9403 |
| 23586  | DDX58    | 23 | 1.38E-01 | 20 | 1.47E-02 | NS | NS | 0.2943 |
| 3495   | IGHD     | 1  | 1.39E-01 | 0  | N/A      | NS | NS | N/A    |
| 3507   | IGHM     | 1  | 1.39E-01 | 0  | N/A      | NS | NS | N/A    |
| 1088   | CEACAM8  | 1  | 1.42E-01 | 1  | 3.12E-01 | NS | NS | 0.3118 |
| 3627   | CXCL10   | 8  | 1.44E-01 | 7  | 4.15E-03 | NS | NS | 0.0103 |
| 4283   | CXCL9    | 6  | 1.44E-01 | 5  | 6.35E-01 | NS | NS | 0.9248 |
| 8744   | TNFSF9   | 8  | 1.44E-01 | 7  | 1.61E-01 | NS | NS | 0.5918 |
| 2794   | GNL1     | 20 | 1.46E-01 | 25 | 1.84E-03 | NS | NS | 0.0113 |
| 51371  | POMP     | 13 | 1.47E-01 | 13 | 6.30E-02 | NS | NS | 0.6798 |
| 1594   | CYP27B1  | 8  | 1.48E-01 | 7  | 6.61E-01 | NS | NS | 0.9283 |
| 353219 | KAAG1    | 8  | 1.49E-01 | 8  | 3.21E-01 | NS | NS | 0.9571 |
| 200316 | APOBEC3F | 5  | 1.54E-01 | 4  | 1.57E-01 | NS | NS | 0.2608 |
| 54106  | TLR9     | 7  | 1.54E-01 | 7  | 2.38E-01 | NS | NS | 0.6024 |
| 3383   | ICAM1    | 11 | 1.55E-01 | 13 | 1.53E-01 | NS | NS | 0.8141 |
| 79671  | NLRX1    | 10 | 1.55E-01 | 10 | 5.20E-02 | NS | NS | 0.3651 |
| 57817  | HAMP     | 7  | 1.56E-01 | 7  | 6.27E-02 | NS | NS | 0.4389 |
| 115362 | GBP5     | 9  | 1.60E-01 | 9  | 5.92E-02 | NS | NS | 0.3383 |
| 3804   | KIR2DL3  | 2  | 1.62E-01 | 1  | 2.04E-01 | NS | NS | 0.2042 |
| 8743   | TNFSF10  | 19 | 1.63E-01 | 18 | 1.56E-02 | NS | NS | 0.1494 |
| 30835  | CD209    | 18 | 1.63E-01 | 16 | 1.76E-03 | NS | NS | 0.0282 |
| 3575   | IL7R     | 14 | 1.64E-01 | 11 | 2.30E-01 | NS | NS | 0.8440 |
| 3078   | CFHR1    | 2  | 1.64E-01 | 1  | 6.49E-01 | NS | NS | 0.6487 |
| 146722 | CD300LF  | 7  | 1.69E-01 | 7  | 5.34E-01 | NS | NS | 0.9372 |
| 10990  | LILRB5   | 7  | 1.69E-01 | 8  | 3.18E-01 | NS | NS | 0.8889 |
| 972    | CD74     | 7  | 1.70E-01 | 7  | 2.06E-01 | NS | NS | 0.4098 |
| 124599 | CD300LB  | 10 | 1.71E-01 | 10 | 7.14E-01 | NS | NS | 1.0000 |
| 911    | CD1C     | 3  | 1.71E-01 | 3  | 6.46E-01 | NS | NS | 0.8040 |
| 3133   | HLA-E    | 20 | 1.74E-01 | 18 | 3.23E-03 | NS | NS | 0.0581 |



|        |          |    |          |    |          |    |    |        |
|--------|----------|----|----------|----|----------|----|----|--------|
| 397    | ARHGDI2  | 20 | 1.77E-01 | 21 | 1.44E-02 | NS | NS | 0.1865 |
| 27166  | PRELID1  | 5  | 1.77E-01 | 5  | 1.08E-01 | NS | NS | 0.5385 |
| 10175  | CNIH     | 9  | 1.78E-01 | 8  | 4.19E-02 | NS | NS | 0.3352 |
| 1054   | CEBPG    | 13 | 1.78E-01 | 11 | 1.42E-03 | NS | NS | 0.0157 |
| 3552   | IL1A     | 11 | 1.80E-01 | 11 | 2.95E-01 | NS | NS | 1.0000 |
| 1440   | CSF3     | 5  | 1.82E-01 | 4  | 9.77E-02 | NS | NS | 0.3909 |
| 7096   | TLR1     | 7  | 1.84E-01 | 10 | 4.60E-01 | NS | NS | 0.9887 |
| 3539   | IGLC3    | 9  | 1.84E-01 | 9  | 7.26E-02 | NS | NS | 0.5451 |
| 684    | BST2     | 7  | 1.86E-01 | 7  | 5.22E-01 | NS | NS | 0.9920 |
| 23098  | SARM1    | 10 | 1.87E-01 | 10 | 9.10E-02 | NS | NS | 0.5922 |
| 4986   | OPRK1    | 25 | 1.90E-01 | 25 | 6.44E-03 | NS | NS | 0.1610 |
| 9447   | AIM2     | 2  | 1.93E-01 | 2  | 2.33E-01 | NS | NS | 0.4655 |
| 1673   | DEFB4    | 1  | 1.95E-01 | 0  | N/A      | NS | NS | N/A    |
| 1130   | LYST     | 18 | 1.98E-01 | 16 | 3.14E-01 | NS | NS | 0.9586 |
| 140850 | DEFB127  | 10 | 1.98E-01 | 10 | 1.08E-01 | NS | NS | 1.0000 |
| 1437   | CSF2     | 6  | 2.02E-01 | 6  | 5.04E-01 | NS | NS | 0.9761 |
| 3562   | IL3      | 4  | 2.02E-01 | 4  | 5.04E-01 | NS | NS | 0.9761 |
| 10581  | IFITM2   | 6  | 2.03E-01 | 4  | 9.18E-02 | NS | NS | 0.3674 |
| 54795  | TRPM4    | 15 | 2.04E-01 | 15 | 8.91E-02 | NS | NS | 0.6078 |
| 5871   | MAP4K2   | 6  | 2.04E-01 | 5  | 1.20E-01 | NS | NS | 0.3017 |
| 728    | C5AR1    | 3  | 2.06E-01 | 3  | 7.22E-02 | NS | NS | 0.1200 |
| 10507  | SEMA4D   | 26 | 2.06E-01 | 26 | 1.59E-03 | NS | NS | 0.0413 |
| 1234   | CCR5     | 2  | 2.08E-01 | 2  | 4.49E-01 | NS | NS | 0.5831 |
| 3976   | LIF      | 9  | 2.09E-01 | 8  | 2.30E-03 | NS | NS | 0.0103 |
| 7126   | TNFAIP1  | 8  | 2.13E-01 | 8  | 2.46E-01 | NS | NS | 0.8444 |
| 10871  | CD300C   | 10 | 2.19E-01 | 10 | 6.67E-01 | NS | NS | 1.0000 |
| 7448   | VTN      | 4  | 2.21E-01 | 4  | 2.46E-01 | NS | NS | 0.5392 |
| 3512   | IGJ      | 7  | 2.24E-01 | 8  | 4.32E-01 | NS | NS | 0.8219 |
| 973    | CD79A    | 4  | 2.30E-01 | 4  | 5.08E-01 | NS | NS | 0.9150 |
| 28776  | IGLV7-43 | 11 | 2.30E-01 | 11 | 1.73E-01 | NS | NS | 0.7184 |
| 57824  | HMHB1    | 13 | 2.32E-01 | 13 | 1.71E-01 | NS | NS | 0.7254 |
| 4436   | MSH2     | 19 | 2.40E-01 | 17 | 2.27E-03 | NS | NS | 0.0387 |
| 64135  | IFIH1    | 6  | 2.42E-01 | 4  | 5.25E-01 | NS | NS | 0.8092 |
| 388646 | GBP7     | 9  | 2.49E-01 | 9  | 4.27E-01 | NS | NS | 0.9774 |
| 8575   | PRKRA    | 7  | 2.52E-01 | 7  | 3.31E-01 | NS | NS | 0.7709 |
| 3110   | MNX1     | 2  | 2.57E-01 | 3  | 2.05E-01 | NS | NS | 0.6143 |
| 115361 | GBP4     | 9  | 2.61E-01 | 9  | 4.27E-01 | NS | NS | 0.9774 |
| 9214   | FAIM3    | 7  | 2.67E-01 | 5  | 4.27E-01 | NS | NS | 0.7884 |
| 925    | CD8A     | 5  | 2.70E-01 | 6  | 5.29E-01 | NS | NS | 0.6926 |
| 57105  | CYSLTR2  | 6  | 2.72E-01 | 6  | 9.93E-03 | NS | NS | 0.0596 |
| 117285 | DEFB118  | 5  | 2.73E-01 | 5  | 5.85E-05 | NS | NS | 0.0003 |
| 7462   | LAT2     | 2  | 2.75E-01 | 2  | 1.36E-01 | NS | NS | 0.2628 |
| 2495   | FTH1     | 12 | 2.79E-01 | 12 | 8.39E-02 | NS | NS | 0.6827 |
| 84174  | SLA2     | 6  | 2.81E-01 | 6  | 3.11E-01 | NS | NS | 0.8712 |
| 712    | C1QA     | 7  | 2.87E-01 | 6  | 1.12E-01 | NS | NS | 0.6742 |
| 714    | C1QC     | 9  | 2.87E-01 | 8  | 1.12E-01 | NS | NS | 0.8990 |
| 910    | CD1B     | 3  | 2.90E-01 | 2  | 3.35E-01 | NS | NS | 0.6144 |
| 2217   | FCGRT    | 4  | 2.94E-01 | 5  | 4.16E-02 | NS | NS | 0.2081 |
| 6976   | TRGV3    | 7  | 2.98E-01 | 7  | 2.90E-01 | NS | NS | 0.9176 |
| 55611  | OTUB1    | 4  | 3.04E-01 | 5  | 6.29E-02 | NS | NS | 0.1556 |
| 7057   | THBS1    | 9  | 3.05E-01 | 7  | 4.46E-01 | NS | NS | 0.9671 |
| 8763   | CD164    | 6  | 3.15E-01 | 5  | 5.17E-02 | NS | NS | 0.1824 |
| 4153   | MBL2     | 28 | 3.24E-01 | 27 | 6.05E-02 | NS | NS | 0.9020 |
| 27190  | IL17B    | 4  | 3.29E-01 | 4  | 5.58E-02 | NS | NS | 0.1347 |
| 3565   | IL4      | 8  | 3.33E-01 | 8  | 1.80E-01 | NS | NS | 0.8975 |
| 3596   | IL13     | 6  | 3.33E-01 | 6  | 1.80E-01 | NS | NS | 0.8732 |
| 4791   | NFKB2    | 6  | 3.36E-01 | 6  | 2.64E-01 | NS | NS | 0.4837 |
| 664    | BNIP3    | 4  | 3.44E-01 | 3  | 9.29E-03 | NS | NS | 0.0279 |
| 2215   | FCGR3B   | 2  | 3.46E-01 | 3  | 5.29E-02 | NS | NS | 0.1588 |
| 2214   | FCGR3A   | 5  | 3.46E-01 | 4  | 5.29E-02 | NS | NS | 0.2117 |
| 713    | C1QB     | 9  | 3.51E-01 | 8  | 2.36E-01 | NS | NS | 0.8632 |
| 6352   | CCL5     | 3  | 3.53E-01 | 3  | 7.64E-01 | NS | NS | 0.9211 |

|        |           |    |          |    |          |    |    |        |
|--------|-----------|----|----------|----|----------|----|----|--------|
| 28988  | DBNL      | 4  | 3.70E-01 | 4  | 4.83E-01 | NS | NS | 0.7452 |
| 51561  | IL23A     | 2  | 3.71E-01 | 2  | 6.67E-02 | NS | NS | 0.0747 |
| 3430   | IFI35     | 3  | 3.76E-01 | 3  | 2.80E-01 | NS | NS | 0.8393 |
| 80329  | ULBP1     | 5  | 3.81E-01 | 8  | 2.68E-01 | NS | NS | 0.8803 |
| 340205 | TREML1    | 3  | 3.85E-01 | 3  | 3.08E-01 | NS | NS | 0.9238 |
| 54209  | TREM2     | 4  | 3.85E-01 | 4  | 1.68E-01 | NS | NS | 0.4612 |
| 5699   | PSMB10    | 2  | 3.85E-01 | 2  | 1.81E-01 | NS | NS | 0.3629 |
| 79626  | TNFAIP8L2 | 6  | 3.91E-01 | 6  | 5.56E-01 | NS | NS | 0.9748 |
| 6361   | CCL17     | 10 | 4.13E-01 | 12 | 1.52E-01 | NS | NS | 0.9234 |
| 28442  | IGHV3-23  | 1  | 4.14E-01 | 0  | N/A      | NS | NS | N/A    |
| 3811   | KIR3DL1   | 3  | 4.16E-01 | 3  | 8.75E-01 | NS | NS | 0.9287 |
| 79132  | DHX58     | 5  | 4.17E-01 | 3  | 3.96E-01 | NS | NS | 0.7905 |
| 2302   | FOXJ1     | 4  | 4.26E-01 | 4  | 4.84E-01 | NS | NS | 0.7269 |
| 7494   | XBP1      | 4  | 4.30E-01 | 4  | 9.80E-02 | NS | NS | 0.1921 |
| 246778 | IL27      | 3  | 4.54E-01 | 3  | 1.27E-03 | NS | NS | 0.0038 |
| 51554  | CCRL1     | 1  | 4.63E-01 | 1  | 8.55E-01 | NS | NS | 0.8552 |
| 5452   | POU2F2    | 4  | 4.84E-01 | 5  | 2.83E-01 | NS | NS | 0.7142 |
| 4615   | MYD88     | 5  | 4.86E-01 | 5  | 1.91E-01 | NS | NS | 0.4291 |
| 10437  | IFI30     | 5  | 5.13E-01 | 5  | 1.55E-01 | NS | NS | 0.7762 |
| 5970   | RELA      | 6  | 5.20E-01 | 6  | 4.74E-01 | NS | NS | 0.7798 |
| 3558   | IL2       | 3  | 5.33E-01 | 3  | 1.91E-02 | NS | NS | 0.0574 |
| 5734   | PTGER4    | 3  | 5.39E-01 | 3  | 9.63E-02 | NS | NS | 0.2889 |
| 260434 | PYDC1     | 1  | 5.46E-01 | 1  | 1.47E-01 | NS | NS | 0.1470 |
| 6373   | CXCL11    | 4  | 5.62E-01 | 4  | 4.15E-03 | NS | NS | 0.0059 |
| 5989   | RFX1      | 3  | 5.81E-01 | 3  | 3.70E-01 | NS | NS | 0.7378 |
| 729230 | FLJ78302  | 1  | 6.07E-01 | 1  | 4.49E-01 | NS | NS | 0.4493 |
| 10068  | IL18BP    | 2  | 6.18E-01 | 2  | 2.23E-01 | NS | NS | 0.4451 |
| 3514   | IGKC      | 1  | 6.50E-01 | 0  | N/A      | NS | NS | N/A    |
| 1510   | CTSE      | 1  | 6.75E-01 | 1  | 2.35E-01 | NS | NS | 0.2348 |
| 1237   | CCR8      | 2  | 6.77E-01 | 5  | 7.38E-02 | NS | NS | 0.1394 |
| 5896   | RAG1      | 4  | 7.33E-01 | 4  | 3.92E-02 | NS | NS | 0.1570 |
| 28912  | IGKV3-20  | 1  | 7.84E-01 | 0  | N/A      | NS | NS | N/A    |
| 10383  | TUBB2C    | 1  | 9.90E-01 | 1  | 4.70E-01 | NS | NS | 0.4703 |
