# Supplementary material for: Genetic Evidence Implicates the Immune System and Cholesterol Metabolism in the Aetiology of Alzheimer's Disease
Source: PLoS One. 2010 Nov 15;5(11):e13950. doi: 10.1371/journal.pone.0013950 (PMC2981526; doi:10.1371/journal.pone.0013950)
Supplement: Table S3 — List of KEGG categories significantly (p<0.05) enriched in both GWAS. “Joint p” is the probability of observing by chance at least one category among the entire set of categories tested with joint enrichment (defined as the product of enrichment p-values from the two GWAS) at least as extreme as that observed in the real data. This corrects for the multiple non-independent GO categories being tested. (0.00 MB PDF) [file pone.0013950.s003.pdf]

**Table S3 List of KEGG categories significantly ( $p < 0.05$ ) enriched in both GWAS**

| KEGG pathway | p-val (Harold) | p-val (Lambert) | Joint p | Function                   |
|--------------|----------------|-----------------|---------|----------------------------|
| 5310         | 0.0010         | 0.0026          | 0.0016  | Asthma                     |
| 4640         | 0.0060         | 0.0044          | 0.0068  | Hematopoietic cell lineage |
| 5332         | 0.0074         | 0.0106          | 0.0158  | Graft-versus-host disease  |
| 5330         | 0.0078         | 0.0126          | 0.0189  | Allograft rejection        |
| 5320         | 0.0246         | 0.0042          | 0.0197  | Autoimmune thyroid disease |
| 4940         | 0.0304         | 0.0072          | 0.0319  | Type I diabetes mellitus   |

“Joint p” is the probability of observing by chance at least one category among the entire set of categories tested with joint enrichment (defined as the product of enrichment p-values from the two GWAS) at least as extreme as that observed in the real data. This corrects for the multiple non-independent GO categories being tested.
